# Supplementary material for: Bridging solvent molecules mediate RNase A – Ligand binding
Source: PubMed Central journal article supplement (PMC6808499; doi:10.1371/journal.pone.0224271), 2019-10-23

**A**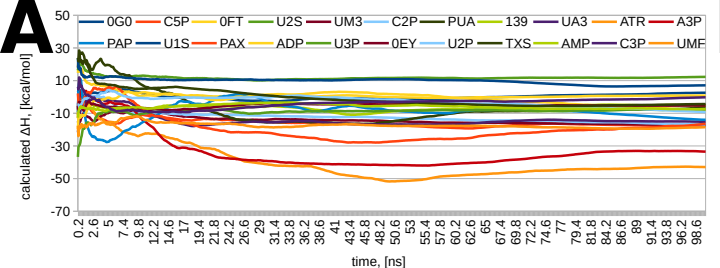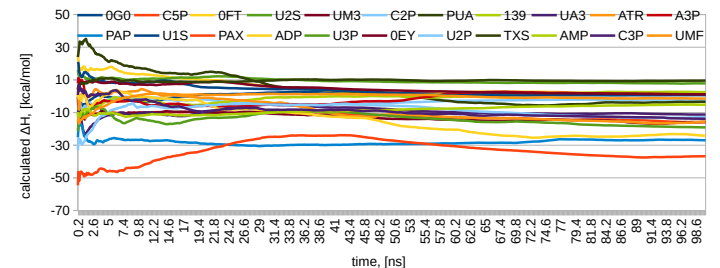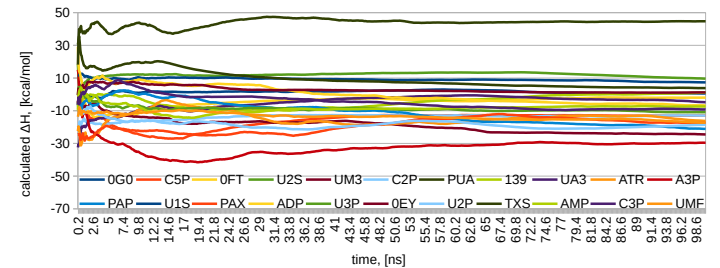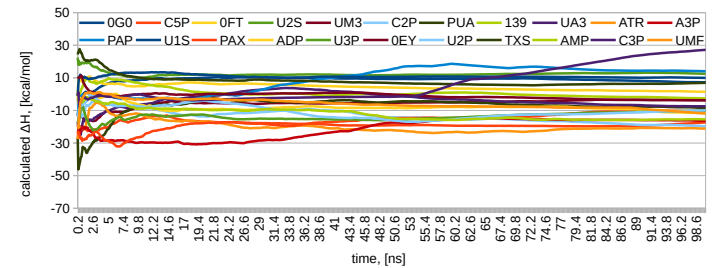**B**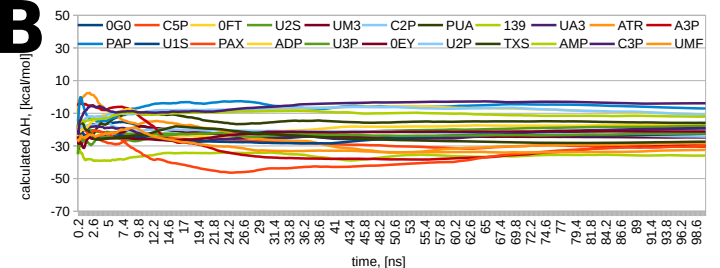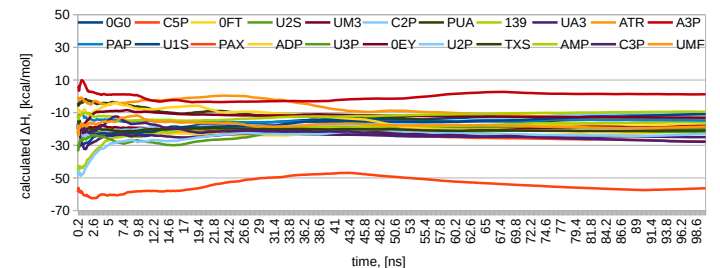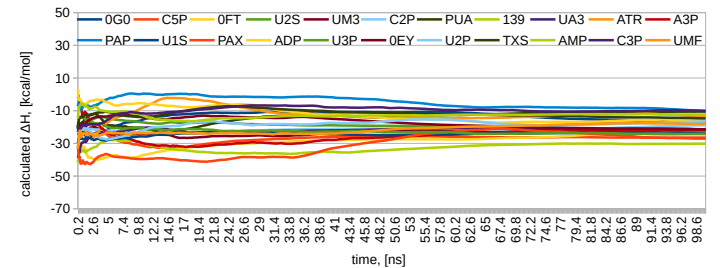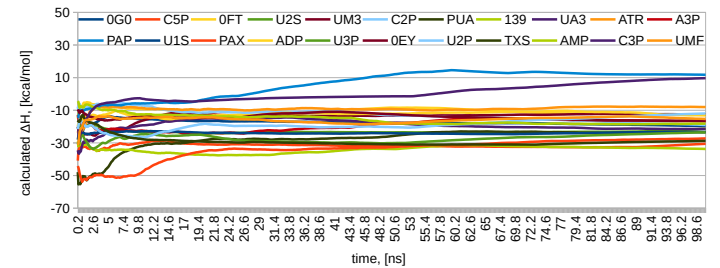

Supplement: pone.0224271.s004.pdf [file pone.0224271.s004.pdf]
