# Supplementary material for: Bridging solvent molecules mediate RNase A – Ligand binding
Source: PLoS One. 2019 Oct 23;14(10):e0224271. doi: 10.1371/journal.pone.0224271 (PMC6808499; doi:10.1371/journal.pone.0224271)
Supplement: S1 File — Sheet 1 contains the experimental affinity data between RNase A and the 22 ligands, expressed as pKi values, and the computed enthalpies from the four replicas. Sheet 2 contains the average Cα RMSD values; sheet 3 –the Cα RMSFs; sheet 4 –the ligand heavy atom RMSDs; sheet 5 –the convergence of the MM-PBSA and MM-GBSA values without bridging solvent; sheet 6 –the convergence of the MM-PBSA and MM-GBSA values with bridging solvent; sheet 7 –the average number of bridging waters and ions across the four replicas for every compound and the corresponding standard deviation, followed by the average number of bridges and the standard deviations; sheet 8 –the radial distribution functions for bridging water and bridging sodium ions around the ligands calculated from the four replicas. (XLSX) [file pone.0224271.s007.xlsx]

## Sheet: CORRELATIONS
			ΔH VALUES IN THE COLUMNS BELOW ARE GIVEN IN KCAL/MOL																			ΔH VALUES IN THE COLUMNS BELOW ARE GIVEN IN KCAL/MOL											ΔH VALUES IN THE COLUMNS BELOW ARE GIVEN IN KCAL/MOL
RESULTS WITH STANDARD AMBER PARAMETERS FROM THE ENTIRE PRODUCTION RUNS (0 – 100 ns)																						RESULTS WITH STANDARD AMBER PARAMETERS FROM THE ENTIRE PRODUCTION RUNS (0 – 100 ns)								RESULTS WITH STANDARD AMBER PARAMETERS FROM THE LATTER HALVES OF THE PRODUCTION RUNS (50 – 100 ns)
											Bridging solvent is treated as part of the protein											Bridging solvent is treated as part of the ligand																			Bridging solvent is treated as part of the protein
“pb no wat” are MM-PBSA results without bridging solvent; “gb no wat” are MM-GBSA results without bridging solvent; “pb wat” are MM-PBSA results with bridging solvent; “gb wat” are MM-GBSA results with bridging solvent																														“pb no wat” are MM-PBSA results without bridging solvent; “gb no wat” are MM-GBSA results without bridging solvent; “pb wat” are MM-PBSA results with bridging solvent; “gb wat” are MM-GBSA results with bridging solvent
ligand name	pKi	PDB ID	gb no wat rep1	pb no wat rep1	gb no wat rep2	pb no wat rep2	gb no wat rep3	pb no wat rep3	gb no wat rep4	pb no wat rep4	gb wat rep1	pb wat rep1	gb wat rep2	pb wat rep 2	gb wat rep3	pb wat rep3	gb wat rep4	pb wat rep4	ligand name	pKi	PDB ID	gb wat rep1	pb wat rep1	gb wat rep2	pb wat rep2	gb wat rep3	pb wat rep3	gb wat rep4	pb wat rep4	ligand name	pKi	PDB ID	gb rep1	pb rep1	gb rep2	pb rep2	gb rep3	pb rep3	gb rep4	pb rep4	gb wat rep1	pb wat rep1	gb wat rep2	pb wat rep 2	gb wat rep3	pb wat rep3	gb wat rep4	pb wat rep4
0G0	4.51	4g90	-19.2105	2.58216	-10.9117	1.40881	-16.4146	0.557783	-19.4815	7.30259	-22.4614	-3.4738	-12.5962	-3.49259	-18.3837	-4.19492	-30.413	-14.1957	0G0	4.51	4g90	36.3714	23.5551	36.414	18.1483	52.1892	34.208	12.7733	0.658224	0G0	4.51	4g90	-13.8446	6.08526	-7.86316	0.74424	-21.8482	-1.23326	-21.2433	5.30885	-16.5402	0.296544	-7.59884	-1.24159	-23.9018	-6.29484	-31.4183	-14.9642
C5P	3.07	1rnm	-30.5262	-17.5358	-27.6188	-15.9143	-26.4405	-12.9323	-30.5278	-17.3079	-59.7267	-57.4698	-54.3562	-57.1886	-47.5167	-35.3466	-55.908	-51.8095	C5P	3.07	1rnm	21.9272	-9.00152	18.8753	-7.6951	44.2511	16.6403	17.3628	-13.3657	C5P	3.07	1rnm	-30.9606	-17.7913	-31.7366	-20.133	-27.4239	-13.0797	-29.1993	-15.5417	-62.5101	-59.0304	-60.6742	-62.1012	-47.1779	-33.0355	-53.5389	-47.9946
0FT	4.59	4g8y	-17.2739	0.81069	-17.7592	1.27649	-23.5462	-1.97635	-12.9087	1.48034	-20.9518	-7.15628	-21.2033	-6.90569	-26.6151	-8.03084	-15.3166	-4.98765	0FT	4.59	4g8y	38.5333	27.1444	25.7818	14.7894	37.793	27.8883	33.7841	17.6387	0FT	4.59	4g8y	1.77029	1.77029	-13.3176	1.1857	-19.6662	-1.06181	-17.4401	-1.14968	-21.6221	-9.6344	-15.5074	-4.48773	-22.3007	-6.53706	-19.8062	-6.84443
U2S	3.75	3d6p	-17.7111	12.285	-19.5688	7.84781	-17.3335	9.62245	-21.2441	12.4739	-26.7642	-7.46285	-27.3204	-8.03455	-23.7247	-6.02484	-31.4325	-13.3002	U2S	3.75	3d6p	33.8852	26.941	11.7212	6.62626	26.3189	17.283	23.0098	16.8586	U2S	3.75	3d6p	-14.7726	12.9474	-20.2217	6.88049	-15.4056	6.23215	-18.9552	13.2847	-23.1039	-3.97117	-27.9551	-8.22016	-19.9202	-5.37747	-28.2419	-11.3058
UM3	4.74	1w4p	-24.7733	-17.1415	-18.061	-15.7178	-13.4398	-1.43646	-12.5582	-3.64972	-59.5066	-55.1991	-63.2118	-65.5086	-59.4624	-59.3987	-31.8177	-37.5341	UM3	4.74	1w4p	34.3799	0.798756	44.0427	12.4195	40.5007	2.24343	59.8602	37.1077	UM3	4.74	1w4p	-25.3818	-19.3427	-12.7486	-17.6044	-12.8216	-3.80779	-11.8525	-1.96875	-60.059	-54.3663	-61.9498	-65.916	-63.0359	-68.6522	-30.5201	-37.6486
C2P	5.15	1jvu	-24.2823	-16.9107	-10.1815	-2.54957	-18.8613	-12.9845	-19.0404	-19.7888	-52.168	-48.0237	-29.6327	-27.26	-56.3326	-52.1581	-43.7347	-44.3845	C2P	5.15	1jvu	30.6143	5.42243	45.3958	14.9744	53.1819	26.4773	56.1237	16.7635	C2P	5.15	1jvu	-27.2955	-21.0997	-3.7622	-0.915958	-16.6876	-13.0485	-25.0792	-25.4068	-52.3452	-47.9096	-9.25957	-10.2714	-52.0111	-46.9226	-43.7347	-44.3845
PUA	7.57	1qhc	-15.8698	-6.27652	-14.5467	-3.36153	-10.5105	44.7294	-23.4132	-8.66158	-124.959	-152.051	-93.0357	-101.698	-136.114	-151.469	-91.3117	-86.3339	PUA	7.57	1qhc	32.2327	10.861	38.1802	12.6696	19.5659	7.04473	32.7558	14.7105	PUA	7.57	1qhc	-16.1285	2.4933	-16.1858	-8.41554	-7.46799	44.5569	-20.9494	-12.5728	-136.706	-162.939	-92.1565	-105.75	-128.858	-140.343	-93.1447	-96.915
139	4.95	1jn4	-35.8796	-5.0758	-15.9767	2.51964	-30.1563	1.04313	-33.7113	-2.59885	-66.297	-33.8971	-37.039	-19.5632	-61.3034	-30.8498	-64.7181	-33.919	139	4.95	1jn4	25.0336	12.7017	56.611	33.8653	25.2261	4.39855	22.5134	14.0958	139	4.95	1jn4	-35.3472	-1.30174	-13.6389	5.05052	-26.3607	8.2438	-33.6785	-4.80692	-66.1881	-32.901	-39.8864	-21.6804	-58.283	-27.6043	-64.1341	-38.0563
UA3	5.22	1w4o	-19.0927	-15.2075	-25.0345	-11.2831	-21.3687	-4.8041	-21.4173	-7.43505	-44.9375	-45.5138	-63.1007	-56.4422	-64.9685	-52.9993	-61.5118	-55.6684	UA3	5.22	1w4o	53.1361	21.97	42.2207	15.3318	44.0872	15.5754	52.4978	24.0156	UA3	5.22	1w4o	-12.4646	-13.6222	-25.9119	-14.5565	-21.5156	-7.86348	-24.7817	-14.1202	-33.1439	-41.5936	-64.565	-61.9984	-60.4001	-50.7486	-60.8774	-52.6647
ATR	6.28	1afl	-28.6109	-42.9085	-13.7905	-15.484	-13.523	-16.2477	-8.02447	-21.1114	-89.1285	-129.066	-127.881	-190.801	-99.1879	-152.64	-95.6489	-142.715	ATR	6.28	1afl	34.2916	-8.17444	35.5962	20.4845	46.4657	15.6239	38.0171	2.54784	ATR	6.28	1afl	-23.1883	-34.164	-18.8162	-19.9048	-12.8132	-14.3046	-6.82093	-20.1752	-56.1996	-86.4301	-143.831	-208.231	-95.7463	-150.188	-91.0974	-136.511
A3P	5.3	1o0f	-30.0062	-33.5019	1.26222	1.1205	-21.8021	-29.6104	-16.7494	-16.3999	-82.6039	-103.723	-37.8906	-59.901	-80.9917	-98.7165	-51.8709	-63.8654	A3P	5.3	1o0f	34.6685	-4.70141	69.5484	29.3759	38.7646	-8.16037	62.8822	23.6331	A3P	5.3	1o0f	-21.7619	-25.2427	3.9499	5.23755	-17.6101	-26.8976	-15.7294	-15.3566	-77.5161	-104.161	-40.1654	-69.1198	-80.3701	-104.073	-46.6823	-64.8663
PAP	6.62	1afk	-7.05767	-13.9918	-14.8052	-26.9638	-9.96583	-21.0959	11.7644	14.0341	-87.578	-151.624	-98.6191	-133.862	-74.4235	-106.604	-65.732	-143.303	PAP	6.62	1afk	39.0301	-2.49688	26.186	-13.3272	47.0964	-2.21808	68.2473	33.2783	PAP	6.62	1afk	-8.13134	-19.6795	-14.0057	-24.6912	-15.8724	-31.4299	11.7541	12.8112	-52.5837	-108.054	-96.2266	-131.398	-71.6651	-96.8924	-58.9516	-137.231
U1S	4.11	3d6o	-22.5393	7.11138	-10.7662	0.691249	-23.8784	7.31616	-23.3258	9.99645	-28.892	-9.08546	-11.8	-2.61246	-31.842	-9.24062	-32.9984	-13.5175	U1S	4.11	3d6o	13.9138	14.7207	14.7714	8.20081	26.5927	21.7107	19.345	16.5834	U1S	4.11	3d6o	-19.7401	3.40936	-6.10544	-0.644536	-22.8005	5.81103	-22.5952	9.38979	-23.9671	-8.57662	-5.62842	-0.997288	-30.969	-10.3666	-32.1795	-12.8109
PAX	7.8	1u1b	-30.0262	-16.4831	-56.3192	-36.7415	-27.0766	-17.4648	-27.233	-10.2051	-128.611	-138.501	-164.402	-164.4	-123.431	-131.817	-104.587	-103.136	PAX	7.8	1u1b	9.76502	-18.417	-23.5825	-45.4079	12.8678	-12.797	22.4896	0.780431	PAX	7.8	1u1b	-18.5346	-5.67005	-63.4577	-46.4156	-26.5825	-17.2383	-21.8939	-5.5946	-131.639	-148.763	-174.752	-162.912	-139.093	-150.455	-106.134	-107.084
ADP	5.92	1o0h	-10.7593	-8.18423	-22.6764	-24.2484	-15.5081	-6.78599	-13.0303	-11.7263	-30.8164	-35.1621	-50.5737	-54.3593	-39.8586	-38.1178	-35.0195	-35.6191	ADP	5.92	1o0h	63.7822	25.5166	56.9537	20.5281	59.9562	22.8713	71.0114	30.2241	ADP	5.92	1o0h	-15.7026	-18.1113	-27.9812	-31.5432	-15.9782	-11.6232	-13.9809	-14.9658	-34.1307	-38.2664	-58.4457	-64.2044	-40.4551	-37.7213	-33.8378	-35.7122
U3P	4.09	1o0n	-22.4201	-7.77166	-21.8943	-19.0593	-24.2745	-10.8775	-23.5176	-10.0831	-47.8976	-33.2205	-53.6848	-51.684	-53.9896	-39.7217	-52.9429	-49.1679	U3P	4.09	1o0n	56.6363	34.1298	36.1385	-1.64485	55.1554	32.4761	51.5385	29.987	U3P	4.09	1o0n	-21.1538	-7.06022	-22.9823	-26.0802	-25.3891	-12.6473	-16.9159	-4.41844	-45.9245	-30.1104	-55.9348	-56.2336	-56.5058	-43.0348	-45.4932	-46.9146
0EY	5.8	4g8v	-21.1634	-5.25742	-13.0497	1.12292	-21.367	1.23103	-16.4001	-3.73937	-22.4176	-8.61503	-14.4951	-2.86591	-24.93	-6.86597	-17.8386	-7.34739	0EY	5.8	4g8v	27.0315	16.375	48.3791	32.8483	40.3532	30.2368	49.2592	31.0592	0EY	5.8	4g8v	-20.8521	-5.97848	-14.2963	-1.32683	-25.6469	0.0919204	-20.3963	-7.3263	-21.5551	-8.21493	-14.3928	-3.05025	-29.9724	-8.99822	-21.8656	-10.5066
U2P	5.15	1o0m	-10.8731	-9.23124	-22.9887	-12.7412	-16.5796	-18.5532	-11.9444	-9.94334	-34.0306	-33.8657	-48.9499	-37.6363	-31.3748	-34.6336	-31.1641	-31.8765	U2P	5.15	1o0m	52.7024	19.424	26.3372	-1.98909	44.3195	7.35555	40.7674	7.81834	U2P	5.15	1o0m	-15.5484	-16.8592	-24.421	-19.7661	-16.9365	-19.6244	-3.56548	-3.90743	-34.9904	-37.4383	-42.4864	-35.0241	-27.3648	-30.1962	-12.7239	-17.5079
TXS	3.37	3d8z	-27.4267	-4.36156	-20.9008	9.58608	-14.6792	3.84285	-28.7373	6.92683	-32.1694	-12.2351	-30.2745	-10.2055	-16.4057	-0.864622	-39.0183	-12.5663	TXS	3.37	3d8z	4.05554	5.24137	2.49584	3.79434	14.5516	8.24288	12.1221	13.059	TXS	3.37	3d8z	-28.5967	-5.69104	-21.6979	9.06502	-18.0001	0.173844	-26.6009	7.01916	-32.8476	-12.8627	-30.2972	-9.06314	-18.2758	-2.06318	-37.7746	-11.1987
AMP	4.34	1z6s	-12.0462	-7.41197	-9.46178	-5.23649	-12.3176	-7.42617	-18.1952	-15.4185	-30.022	-31.0231	-22.9804	-21.3528	-27.0828	-22.4268	-43.4286	-40.7251	AMP	4.34	1z6s	50.4494	18.1726	54.7187	22.7099	49.5933	12.6797	44.9779	4.53897	AMP	4.34	1z6s	-14.1685	-9.43714	-7.20011	-2.09007	-11.8357	-6.14274	-18.6201	-16.228	-37.8056	-38.0782	-15.831	-14.1829	-25.4231	-21.1742	-42.5316	-37.5494
C3P	3.99	1rpf	-3.8509	-0.222549	-27.8469	-13.7875	-10.2253	-9.22089	9.69293	27.2037	-13.7744	-18.1662	-53.6605	-40.7273	-32.0995	-32.1576	-19.627	-31.6152	C3P	3.99	1rpf	58.6577	28.2782	43.4483	12.8478	52.8662	18.3536	44.975	10.8954	C3P	3.99	1rpf	-4.35467	2.55479	-33.0922	-18.0105	-12.0614	-12.8946	20.8225	56.0028	-12.9755	-14.0516	-61.7844	-46.2615	-39.5527	-38.1943	-38.434	-59.2652
UMF	5.26	1w4q	-32.4108	-18.4908	-13.4398	-1.43646	-18.1945	-17.2996	-15.3062	-11.8902	-79.6156	-66.8995	-30.8905	-20.3338	-46.4672	-46.1765	-36.6909	-37.8487	UMF	5.26	1w4q	22.99	0.565075	57.9682	29.8886	52.115	18.2665	50.7065	20.7253	UMF	5.26	1w4q	-31.0002	-19.2531	-12.8216	-3.80779	-14.9391	-21.2423	-12.4796	-17.0137	-76.0698	-66.0524	-26.0691	-17.9144	-45.5206	-53.996	-32.6336	-43.872
																									REVS
RESULTS FROM THE ENTIRE PRODUCTION RUNS (0 – 100 ns) WITH NBFIX CORRECTIONS							NBFIX															RESULTS FROM THE ENTIRE PRODUCTION RUNS (0 – 100 ns) WITH NBFIX CORRECTIONS
											Bridging solvent is treated as part of the protein											Bridging solvent is treated as part of the ligand
			gb rep1	pb rep1	gb rep2	pb rep2	gb rep3	pb rep3	gb rep4	pb rep4	gb wat rep1	pb wat rep1	gb wat rep2	pb wat rep 2	gb wat rep3	pb wat rep3	gb wat rep4	pb wat rep4	ligand name	pKi	PDB ID	gb wat rep1	pb wat rep1	gb wat rep2	pb wat rep2	gb wat rep3	pb wat rep3	gb wat rep4	pb wat rep4
0G0	4.51	4g90	-17.7537	2.40992	-10.1683	0.0668421	-20.0919	6.38421	-19.8364	-1.01151	-22.1918	-5.48627	-10.3999	-2.65794	-25.2948	-6.6495	-22.2221	-7.30901	0G0	4.51	4g90	28.7079	12.0148	42.0436	26.8449	18.1185	11.1712	36.7122	21.1179
C5P	3.07	1rnm	-13.9643	3.85906	-5.39028	4.63406	-11.7898	4.05985	-12.1428	5.03819	-35.2332	-23.5207	-13.1567	-7.43828	-30.2383	-18.3714	-31.8495	-20.0369	C5P	3.07	1rnm	59.9513	30.0728	70.195	39.5756	66.1182	36.0477	64.8349	37.7812
0FT	4.59	4g8y	-14.0661	-3.51073	-11.8511	-0.455023	-15.7053	-0.0570605	-18.1515	-1.29811	-20.0107	-14.227	-12.6742	-4.07406	-18.3539	-5.73674	-20.8138	-5.964	0FT	4.59	4g8y	33.9322	14.6213	44.9376	26.4051	28.2253	15.4411	21.831	11.1621
U2S	3.75	3d6p	-20.531	11.0668	-13.8974	4.35218	-20.5471	8.93789	-17.7533	6.58232	-30.3742	-10.9956	-16.6069	-3.0008	-28.3281	-9.04369	-22.9643	-5.65283	U2S	3.75	3d6p	29.3146	16.1797	25.9876	19.6004	23.2879	14.7232	28.1413	20.5638
UM3	4.74	1w4p	-7.78286	7.07553	-9.08497	15.7351	-8.71943	3.71303	-6.03946	2.97208	-27.103	-18.9051	-47.0595	-32.0884	-24.5139	-14.215	-16.1395	-12.6676	UM3	4.74	1w4p	59.9222	24.8403	54.4706	23.353	76.6426	45.8839	75.793	43.8332
C2P	5.15	1jvu	-1.41582	2.44146	-4.48899	5.21648	-2.521	2.38582	-3.59089	2.38181	-6.60183	-5.42201	-19.4135	-11.9601	-6.77	-4.8609	-9.30915	-5.02657	C2P	5.15	1jvu	64.2512	31.8641	64.1124	24.9729	72.0672	40.0972	74.7722	41.5813
PUA	7.57	1qhc	-18.7024	6.47318	-9.61224	7.68763	-6.62207	16.2887	-2.55739	15.8671	-71.1405	-38.989	-58.3193	-40.3503	-64.7546	-54.9483	-64.863	-60.3421	PUA	7.57	1qhc	43.4427	33.3486	50.5125	30.6201	64.9853	40.1099	67.1697	41.3967
139	4.95	1jn4	-19.7399	4.98268	-18.5018	12.4812	-9.60537	5.03848	-8.78989	10.4419	-33.3102	-10.8387	-56.9863	-26.5587	-18.6312	-5.86142	-26.4613	-6.59549	139	4.95	1jn4	59.4329	31.6778	43.3839	25.071	74.0215	51.0135	80.1374	61.8277
UA3	5.22	1w4o	-7.06142	9.6937	-9.54934	8.90676	-6.44551	24.0975	-3.59306	3.84492	-39.8975	-28.6099	-41.6289	-30.4174	-54.6074	-45.0674	-12.9215	-8.49859	UA3	5.22	1w4o	78.0419	48.3304	68.9872	40.4299	65.4564	29.9832	89.6105	59.1691
ATR	6.28	1afl	1.43263	0.17227	3.5464	3.25923	3.072	0.378922	3.42513	2.76295	-13.3561	-31.4259	-20.581	-40.057	2.83514	-5.94045	-13.3689	-23.6787	ATR	6.28	1afl	91.0472	52.4681	97.0592	58.9679	89.2653	46.1	91.2963	50.4638
A3P	5.3	1o0f	0.31162	0.740872	-0.169335	-1.53365	0.994576	4.5491	0.559086	-0.781538	-10.5548	-17.5566	-7.03	-12.1817	-9.48094	-15.7311	-12.6379	-19.4864	A3P	5.3	1o0f	72.346	29.8702	76.2145	37.1529	80.6687	40.7178	87.2787	42.6768
PAP	6.62	1afk	1.19603	-0.855036	-0.308692	-2.50309	3.60503	1.55942	-2.64563	-7.20329	-34.5612	-46.6643	-2.08482	-15.6491	1.30609	-7.78236	-12.5702	-21.6	PAP	6.62	1afk	87.583	51.5114	84.9775	48.108	86.8423	44.3457	87.3206	37.4195
U1S	4.11	3d6o	-23.8033	11.4762	-20.4257	12.9804	-18.0931	2.82304	-8.83496	4.36546	-34.6203	-16.2853	-29.6153	-9.83066	-21.5398	-6.38879	-11.1441	-2.38895	U1S	4.11	3d6o	13.302	7.7506	19.9246	10.3106	20.822	17.024	34.8372	22.7873
PAX	7.8	1u1b	-7.54713	12.2203	-13.3871	13.4242	-1.66428	23.4273	-7.95209	12.461	-69.5427	-49.785	-70.179	-52.6357	-76.4223	-52.3761	-65.4627	-48.7929	PAX	7.8	1u1b	51.2038	28.8037	57.9539	48.1946	51.8454	36.2778	53.3474	31.8428
ADP	5.92	1o0h	-5.8628	-0.525902	-2.6594	2.58291	-4.22179	-0.129838	-1.1361	2.46144	-8.69127	-7.28931	-9.95418	-8.50116	-8.86489	-7.95138	-1.95622	-2.46095	ADP	5.92	1o0h	74.6954	40.5872	89.9423	53.3447	86.4266	55.2457	69.5658	37.4688
U3P	4.09	1o0n	-16.2087	-2.37922	-0.412556	0.839614	-11.1991	5.62003	-6.02599	3.13521	-34.9168	-22.2769	-2.06293	-3.21637	-31.929	-18.0747	-23.7883	-18.3663	U3P	4.09	1o0n	61.8828	34.5938	46.5403	23.4352	73.3104	46.0339	73.1039	36.0782
0EY	5.8	4g8v	-19.5432	-0.837604	-18.2994	-0.97382	-16.8322	-1.89886	-14.4707	0.665851	-21.7302	-5.18552	-19.768	-4.39166	-18.5009	-5.3446	-18.3735	-6.80515	0EY	5.8	4g8v	24.1093	11.8776	35.8669	26.9264	15.6624	4.77519	40.9231	26.7089
U2P	5.15	1o0m	-4.67309	2.82351	-3.35926	2.0517	-12.1823	-2.19035	-5.21552	3.05944	-10.4662	-6.28395	-9.19673	-6.52759	-28.5824	-20.3406	-11.6477	-6.31795	U2P	5.15	1o0m	67.1248	35.7426	73.852	42.5516	62.6124	30.0154	71.5416	38.0582
TXS	3.37	3d8z	-28.5913	8.05033	-19.7288	6.72303	-10.8314	7.53963	-24.5083	7.93782	-36.4049	-9.75039	-23.6176	-3.11877	-15.4227	-3.07624	-29.8668	-4.9044	TXS	3.37	3d8z	18.81	14.4568	18.4545	15.8981	23.8696	15.5911	18.2643	17.6845
AMP	4.34	1z6s	-7.2492	-0.433938	-5.75473	1.25832	-5.44252	4.04515	-6.81909	1.21447	-10.7297	-6.49253	-9.9152	-4.568	-12.6692	-4.98206	-12.3837	-6.49451	AMP	4.34	1z6s	61.7802	30.1621	69.3414	38.5628	75.7681	40.5939	68.2524	31.0116
C3P	3.99	1rpf	-2.78292	1.95985	-5.93705	-0.881532	-0.341415	1.20377	-3.42843	2.7024	-12.9037	-10.5256	-9.99194	-7.99811	-0.784243	-1.16687	-10.0428	-6.19061	C3P	3.99	1rpf	70.9527	38.0646	71.4372	38.7278	35.5457	15.4489	52.4922	22.0518
UMF	5.26	1w4q	-4.09939	-1.18803	0.0054166	0.670531	-11.3782	3.24292	-5.43468	4.69413	-5.06953	-5.31463	-0.366786	-2.31582	-29.7354	-18.1803	-20.5923	-12.1337	UMF	5.26	1w4q	52.573	20.9523	36.0926	17.867	65.9852	33.7675	88.5258	56.8632

## Sheet: RMSDs
REPLICA 1; RMSD VALUES ARE GIVEN IN ANGSTROM
Time, [ns]	0G0	C5P	0FT	U2S	UM3	C2P	PUA	139	UA3	ATR	A3P	PAP	U1S	PAX	ADP	U3P	0EY	U2P	TXS	AMP	C3P	UMF
0.1	0.9879	1.0992	1.003	0.9989	0.9307	0.7841	1.1638	1.1159	0.7774	0.8914	1.1167	0.8991	1.4036	0.7259	0.9573	1.351	0.8694	0.9229	0.855	1.1598	1.0039	1.2614
0.2	0.9903	1.2698	1.2673	0.9793	0.9017	0.878	0.9589	1.1247	0.7783	1.1434	0.9432	1.0085	1.2008	0.6084	0.9053	1.431	0.8783	0.8937	0.9737	1.1808	0.8236	1.1519
0.3	0.7139	1.4805	1.3315	0.9267	0.9924	1.0676	1.1614	1.1598	0.7136	1.0642	0.9527	0.7499	1.3354	0.9356	0.7398	1.3093	0.9351	1.0223	0.9586	1.1821	1.0174	1.0982
0.4	0.9123	1.4618	1.1466	0.9745	1.2049	0.8292	0.9891	1.2126	0.662	0.8283	1.0108	0.8181	1.2032	1.041	1.1959	1.5296	0.7297	1.1062	0.9159	1.2752	1.2059	1.2151
0.5	0.7212	1.5113	1.0895	0.8719	0.9762	0.8604	1.0186	0.8554	0.8141	0.9118	1.0476	1.0079	1.3719	0.9357	0.7891	1.326	0.8621	1.3268	1.0201	1.366	1.4074	1.1288
0.6	0.8006	1.4718	0.9703	0.8499	0.9204	0.7296	1.1924	1.1486	0.7043	0.8845	1.1164	1.0375	1.2648	1.0275	0.8843	1.0199	0.7579	1.0012	0.9886	1.2314	1.1618	1.2177
0.7	1.1137	1.264	1.0825	1.038	0.8003	0.7319	1.1506	0.9488	0.728	0.7726	1.2676	1.013	1.3617	1.0904	1.0302	1.2651	0.938	0.9163	0.8689	1.1462	1.2215	1.0986
0.8	1.1996	1.2565	1.0799	1.0545	0.8837	0.6992	1.1738	0.9693	0.69	0.8881	1.1789	0.8162	1.1608	0.95	1.054	0.7988	0.8545	1.0867	0.8792	1.2946	1.4223	1.2647
0.9	1.0412	1.3795	1.0961	0.914	0.8813	0.784	1.1856	0.7672	0.7104	0.8532	0.9843	1.152	1.4065	1.0011	0.8985	1.0377	1.0318	1.0109	1.0873	1.1007	1.1971	1.4237
1	1.1494	1.5061	1.0078	1.1701	0.8565	0.7201	1.1584	1.0009	0.762	0.9188	1.264	0.9612	0.9976	1.0664	0.79	1.0186	0.9951	1.1637	0.9872	1.29	1.1062	1.0987
1.1	1.2216	1.2629	1.1049	1.0049	0.8923	1.0013	1.2468	0.8734	0.7853	0.9197	1.162	0.9538	1.3488	1.2327	1.026	1.2987	1.1168	1.2076	0.9675	1.3199	1.1313	1.2124
1.2	1.1146	1.3446	1.1536	1.3491	0.8942	1.0808	1.2467	0.8717	0.5822	1.006	1.4121	1.0641	1.2881	1.1404	1.0121	1.1239	1.0371	1.2336	1.1226	1.3451	1.2851	1.1379
1.3	1.2529	1.3526	1.1248	1.4198	1.0826	1.0956	1.2595	1.0305	0.7717	1.149	1.153	0.9182	1.4173	1.0355	0.9687	0.9492	0.8065	1.2793	0.9103	1.3246	0.9959	1.3759
1.4	1.2056	1.2909	1.1804	1.1907	0.9146	1.0989	1.1259	0.9594	0.785	1.3215	1.2612	0.9902	1.3634	0.9179	0.8942	0.8557	0.9528	1.1158	0.8286	1.263	1.0912	1.202
1.5	1.0766	1.3588	1.1874	1.0923	1.1217	1.0448	1.1354	0.7992	0.8869	1.1695	1.0339	0.8387	1.3699	1.1138	0.8439	1.1677	1.2536	1.0918	1.0639	1.2147	1.1699	1.2366
1.6	1.1278	1.3519	0.9186	1.113	1.0698	1.0656	1.1209	0.8195	0.7377	1.4173	1.2561	0.9099	1.277	1.0694	1.0449	0.719	1.2078	1.1221	0.9164	1.1453	1.1287	1.2887
1.7	1.1943	1.4852	1.0844	1.2649	0.9137	1.0748	1.227	1.1027	0.7763	1.3245	1.5671	0.958	0.9825	1.2613	0.8709	1.1492	1.0856	1.1663	0.8371	1.3529	1.4459	1.0721
1.8	1.0509	1.1555	1.0512	1.6042	1.1963	1.0223	1.0175	0.8762	0.7307	1.1688	1.4864	0.9794	1.1194	1.2142	1.0046	1.0008	1.2954	1.2029	0.8819	1.399	1.1824	0.9984
1.9	1.1188	1.5626	1.3254	1.8859	1.1785	0.9218	0.9181	0.9834	0.7858	1.4938	1.2431	0.945	1.4718	1.2278	0.9818	1.0188	1.4787	1.1957	0.9602	1.3033	1.1349	1.2409
2	1.1039	1.4433	1.115	1.4274	1.1842	1.0872	1.0635	0.9409	0.8333	1.3493	1.5882	0.9089	1.3756	1.2233	1.0761	0.9176	1.3581	1.3665	1.0392	1.1232	1.0051	1.0452
2.1	1.1082	1.2087	1.05	1.541	1.308	1.0297	1.0122	1.084	0.9037	1.195	1.393	1.0763	1.3092	0.9814	1.1358	1.1199	1.2895	1.3872	0.8256	1.349	1.082	0.9148
2.2	0.9538	0.9525	1.0953	1.4132	1.4458	1.0528	1.1811	1.1992	0.8346	1.3338	1.4097	1.1973	1.3519	1.1459	0.9799	0.9671	1.2496	1.2465	0.9238	1.3892	1.1838	1.1372
2.3	1.0033	1.2452	1.2556	1.1158	1.329	1.2556	1.1026	1.0959	0.7651	1.2056	1.1068	1.008	1.4661	1.1404	1.1475	0.9257	1.1906	1.4761	1.2103	1.2534	1.1563	1.0994
2.4	1.1166	1.2164	1.1016	1.358	1.2807	1.1612	1.0666	1.1748	0.8624	1.1118	1.3825	0.9551	1.3553	1.2445	0.9048	0.8265	1.4844	1.2192	0.9804	1.3316	0.99	0.9768
2.5	1.1803	1.2566	1.0141	1.6272	1.3029	1.076	1.4598	1.048	1.0276	1.1782	1.179	1.0698	1.1285	1.44	1.1072	0.929	1.275	1.2387	0.9242	1.3882	1.1773	1.0706
2.6	1.037	1.3408	0.9757	1.4074	1.3143	1.0062	1.559	1.0697	0.7518	1.2137	1.4028	1.0365	1.3643	1.2136	1.0065	0.8268	1.424	1.3106	0.8395	1.2925	1.0652	0.932
2.7	1.232	1.3406	1.0205	1.3293	1.3465	1.0269	1.5645	1.2054	0.8929	1.2935	1.3379	0.9073	1.2432	1.3004	0.9653	1.0718	1.3395	1.3886	0.8679	1.4272	1.0547	1.1913
2.8	1.0505	1.3319	1.0899	1.2467	1.2494	1.0662	1.7898	0.9371	0.907	0.7037	1.3034	1.0094	1.4229	1.2181	0.9082	1.111	1.2068	1.3878	1.0638	1.2996	1.3312	0.9002
2.9	1.0796	1.2138	1.443	1.186	1.2435	1.1747	1.99	1.1397	0.9022	1.0458	1.4171	0.8629	1.3742	1.2792	0.9152	0.9806	1.2092	1.0627	0.9292	1.3412	1.213	1.1454
3	1.1132	1.34	1.2056	1.3443	1.216	1.3478	2.1676	1.0861	0.872	1.1112	1.1761	1.0592	1.3058	1.3198	1.0953	0.9989	0.9778	1.0061	1.0283	1.3777	1.2268	1.0856
3.1	1.2183	1.291	1.3129	1.4025	1.2905	1.0916	2.054	1.2869	0.889	1.2091	1.3628	0.9868	1.5518	1.6597	0.8449	0.9769	1.085	0.9111	1.0226	1.3395	1.3126	1.2088
3.2	1.0262	1.2345	1.2176	1.1933	1.2603	1.2592	1.837	1.0608	1.0105	1.1396	1.1882	0.8093	1.3387	1.551	0.9251	0.744	1.1223	1.1841	1.0483	1.5373	1.2616	1.1452
3.3	0.9635	1.4057	1.3302	1.4906	1.3018	1.1275	1.7337	0.9533	0.8961	1.2543	1.0779	0.8813	1.4092	1.5707	0.8359	0.9906	1.2642	1.0364	1.0335	1.4996	1.3093	1.2519
3.4	1.3181	1.1071	1.4727	1.5713	1.1756	1.2066	1.691	0.7821	0.792	1.0432	1.2221	0.856	1.4104	1.3382	1.0995	1.0707	1.3182	1.5115	1.0308	1.5941	1.2848	1.2585
3.5	1.1358	1.1852	1.2571	1.5413	1.3052	1.1158	1.5785	1.1546	1.1062	0.891	1.4032	0.9427	1.3749	1.3346	1.2366	1.049	1.1876	1.1113	1.0964	1.5811	1.4245	1.2402
3.6	1.1486	1.2467	1.5981	1.1015	1.4598	1.1962	1.4378	1.0487	1.1464	1.0533	1.2336	0.9644	1.4664	1.4262	0.8561	1.1493	1.1961	1.1641	1.2328	1.5082	1.2575	1.2146
3.7	1.0987	1.3248	1.5324	1.7685	1.3708	1.0551	1.5009	1.0859	0.8849	1.2573	1.305	0.9979	1.2855	1.3669	0.9651	1.0025	1.3552	1.2243	1.1317	1.645	1.2175	1.259
3.8	1.0645	1.3491	1.3135	1.5372	1.2914	1.4163	1.7034	0.9165	1.0437	1.1501	1.322	1.0943	1.3889	1.4071	1.0293	1.0554	1.3448	1.3462	1.0717	1.5563	1.1773	1.0836
3.9	1.3359	1.4955	1.4895	1.4482	1.3767	1.1396	1.4511	0.8913	0.8571	1.2029	1.3637	1.1257	1.5775	1.4185	0.8356	1.0236	1.4494	1.2534	1.0975	1.3639	1.2348	1.2448
4	1.3803	1.4521	1.4288	1.2084	1.3989	1.2887	1.3415	0.9012	0.8775	1.0935	1.4403	1.0635	1.3285	1.5445	0.8015	0.9547	1.2419	1.1872	1.0145	1.6167	1.2089	1.03
4.1	1.5453	1.573	1.339	1.3793	1.5501	1.194	1.4854	1.1524	0.8672	0.9848	1.257	0.9158	1.4998	1.7295	0.8717	0.7847	1.3449	1.2263	1.0413	1.2915	1.2157	1.2815
4.2	1.3819	1.6997	1.3404	1.4444	1.3477	1.2872	1.3494	1.0287	0.8703	1.0784	1.2563	1.1522	1.3745	1.5066	0.8296	0.9152	1.3344	1.2798	1.1735	1.5525	1.019	1.0909
4.3	1.3797	1.7139	1.2224	1.7677	1.4609	1.2301	1.5971	1.0954	0.7664	0.9172	1.2654	0.8952	1.2661	1.7198	0.9447	1.2673	1.5022	1.1866	0.9524	1.5175	1.131	0.9823
4.4	1.1315	1.5098	1.3814	1.6803	1.4618	1.3748	1.7817	1.0357	0.6227	1.0365	1.2033	0.8791	1.3175	1.401	0.6658	1.0807	1.3203	1.2237	0.9964	1.4212	1.3007	1.38
4.5	1.2522	1.6284	1.6376	1.6531	1.3896	1.2577	1.5725	1.0761	0.9556	1.0755	1.2437	0.964	1.1874	1.3592	1.0559	1.1596	1.2108	1.0356	0.9558	1.5136	1.2967	1.3927
4.6	1.327	1.4254	1.456	1.6821	1.5146	1.3008	1.5491	1.187	0.9085	0.9047	1.1962	0.9134	1.1589	1.0855	1.3254	1.1947	1.299	1.4823	0.919	1.4008	1.2387	1.226
4.7	1.2306	1.472	1.4439	1.592	1.6572	1.3334	1.4789	0.9183	0.8406	0.8523	1.015	0.929	1.3429	1.2697	1.0757	1.2135	1.3403	1.5155	0.99	1.658	1.2339	1.0752
4.8	1.3301	1.8461	1.2675	1.8114	1.3169	1.3659	1.2232	0.8165	1.0308	1.0196	1.1172	1.0803	1.2088	1.3629	0.8034	1.3206	1.2667	1.4865	1.1282	1.6297	1.2327	1.237
4.9	1.4914	1.4791	1.3998	1.8224	1.4079	1.1397	1.4857	0.9743	0.7654	0.9058	1.0135	0.97	1.2082	1.2976	1.0045	1.1691	1.4354	1.5569	0.9494	1.3378	1.322	1.0755
5	1.4221	1.3497	1.2295	1.5991	1.4782	1.2911	1.3613	0.9292	0.7283	0.9617	1.1071	1.1202	1.3797	1.3873	0.8981	1.1654	1.4008	1.7655	1.1381	1.0926	1.3986	1.3639
5.1	1.2723	1.4516	1.2672	1.6087	1.5331	1.4685	1.4117	0.8575	0.7528	0.9778	1.0497	1.167	1.2142	1.7322	1.0033	1.2444	1.446	1.4135	0.9701	1.0764	1.3622	1.4499
5.2	1.2664	1.6099	1.5164	1.7187	1.6522	1.7874	1.4774	1.0565	0.8245	1.0843	1.4917	1.0187	1.609	1.2287	0.9033	1.0977	1.6332	1.6518	0.9976	1.3816	1.4079	1.3393
5.3	1.5004	1.7192	1.0793	1.897	1.8885	1.4126	1.3211	1.1042	0.7284	1.0965	1.3939	0.9003	1.7046	1.1551	0.9318	1.3225	1.4608	1.2821	1.2751	1.2461	1.2507	1.3809
5.4	1.4677	1.8595	1.3531	1.9342	1.7049	1.3014	1.4111	1.1038	0.8092	1.1141	1.2302	1.0555	1.4382	1.3152	1.0406	1.3186	1.2567	1.2574	1.0108	1.239	1.2461	1.1799
5.5	1.4061	1.6705	1.2712	1.9667	1.5741	1.2884	1.5481	0.9304	0.733	1.1703	1.1438	0.9078	1.517	1.2854	0.9604	1.2749	1.4906	1.123	1.1164	1.2127	1.4927	1.2793
5.6	1.4458	1.5568	1.2519	1.5004	1.5364	1.2137	1.2445	1.0292	0.8518	1.1523	1.0348	0.9027	1.3839	1.3477	1.0471	1.2201	1.4728	1.4862	1.2095	1.4953	1.4544	1.2912
5.7	1.2508	1.5856	1.5127	1.9749	1.5452	1.3894	1.5339	0.7706	0.8861	1.1566	1.0146	0.9554	1.3773	1.2552	1.1445	1.0067	1.3168	1.6596	0.9772	1.3212	1.3731	1.1676
5.8	1.447	1.7567	1.2891	1.8673	1.6246	1.2252	1.3122	1.0411	0.954	1.194	0.9722	0.9493	1.3173	1.2923	1.2372	1.1237	1.2265	1.5279	1.3245	1.2716	1.3033	1.2445
5.9	1.3777	1.5115	1.2574	2.0129	1.8046	1.419	1.3084	1.0342	0.7484	1.3394	1.0184	0.987	1.2674	1.3752	1.161	1.096	1.4946	1.4857	1.271	1.334	1.3415	1.153
6	1.555	1.7082	1.5378	1.7282	1.7132	1.3084	1.6604	1.0481	0.8949	1.2557	0.9042	1.0676	1.3017	1.1293	1.1948	1.111	1.3629	1.619	1.6662	1.6535	1.1704	1.1468
6.1	1.4531	1.7315	1.4774	1.7152	1.6167	1.503	1.6766	1.1907	0.7915	1.2591	1.0148	0.8922	1.2687	1.3341	1.188	1.0348	1.4235	1.4635	1.4639	1.6654	1.2019	0.9727
6.2	1.5291	1.5362	1.5236	1.6092	1.6886	1.1573	1.4198	1.1516	0.9368	1.318	1.0783	1.0524	1.3072	1.2813	1.2177	1.0836	1.4797	1.5383	1.2623	1.4555	1.2038	1.0125
6.3	1.6647	1.7055	1.3889	1.9606	1.7803	1.4327	1.4431	1.1169	0.8598	1.4117	1.2425	1.1323	1.3303	1.2825	0.9299	1.1384	1.6299	1.5003	1.5179	1.4161	1.0891	1.4239
6.4	1.4186	1.7761	1.5141	1.8853	1.6534	1.2654	1.244	1.047	1.0803	1.2445	1.1211	1.1983	1.7282	1.436	1.0505	1.1819	1.3815	1.5761	1.5912	1.4633	1.2213	1.2049
6.5	1.3303	1.6448	1.2535	1.8044	1.7878	1.5548	1.3513	1.4058	0.8994	1.435	1.4887	0.9867	1.4375	1.4422	1.04	1.0366	1.4482	1.4631	1.5447	1.6162	1.4914	1.4666
6.6	1.5433	1.5377	1.3683	1.739	1.6598	1.1912	1.3318	1.1984	0.8798	1.1718	1.2506	0.9368	1.7363	1.4774	1.1252	1.1328	1.4949	1.6357	1.5824	1.3783	1.3476	1.4946
6.7	1.4941	1.4308	1.1349	1.9439	1.5386	1.3618	1.189	0.988	0.848	1.4497	1.3031	0.9907	1.5652	1.416	1.0632	1.1102	1.3832	1.5937	1.4441	1.4863	1.5704	1.4105
6.8	1.4094	1.6938	1.1523	1.6613	1.8547	1.2219	1.4662	1.2989	1.0013	1.2339	1.3332	1.2422	1.5411	1.3231	0.9587	1.0413	1.3422	1.5175	1.5843	1.4971	1.3199	1.1711
6.9	1.2466	1.3801	1.2871	1.5567	1.8481	1.1968	1.2727	1.3073	0.8875	1.2597	1.2062	1.0713	1.5915	1.1921	1.0568	1.1104	1.3911	1.3694	1.3444	1.6482	1.4102	1.137
7	1.3303	1.3845	1.2082	1.6919	1.7074	1.4574	1.3223	1.3135	0.8983	1.3357	1.1139	0.8685	1.5498	1.2866	1.1133	1.0572	1.7107	1.4791	1.2916	1.2302	1.4886	1.1242
7.1	1.5355	1.1299	1.2557	1.8419	2.034	1.6869	1.628	1.2154	1.0595	1.2979	1.338	0.9038	1.6213	1.312	0.8743	1.0859	1.4275	1.4964	1.3143	1.2427	1.3785	0.9687
7.2	1.4792	1.2776	1.2839	1.6966	1.6703	1.5714	1.5442	1.0458	0.9797	1.2997	1.2272	0.8586	1.5188	1.2063	0.9802	0.9572	1.3568	1.2458	1.4387	1.6637	1.2229	1.0435
7.3	1.3465	1.3623	1.2824	1.6118	1.7775	1.3411	1.5755	1.2104	1.02	1.2747	0.9504	0.8362	1.5329	1.282	0.9454	1.0083	1.146	1.4855	1.445	1.4216	1.3256	1.1739
7.4	1.4292	1.123	1.2682	1.6494	1.7198	1.3849	1.3705	1.4672	1.0082	1.2755	1.1012	1.0426	1.3447	1.1994	1.05	1.0446	1.2967	1.6416	1.5601	1.3183	1.1768	1.1334
7.5	1.2539	1.3116	1.3796	1.5979	1.647	1.2359	1.4065	1.2067	1.0228	1.4149	1.0518	1.1179	1.2312	1.2614	1.0035	1.0799	1.0952	1.4799	1.2489	1.4128	1.2779	1.3652
7.6	1.2391	1.2289	1.3571	1.8371	1.7608	1.2219	1.3056	1.2611	0.9606	1.1306	1.0888	1.2403	1.4191	1.4065	1.1361	1.0624	1.1227	1.5824	1.2964	1.1706	1.4347	1.2555
7.7	1.2288	1.3812	1.3996	1.9161	2.148	1.2493	1.3169	1.209	0.9783	1.1505	1.1542	1.0251	1.4228	1.453	1.0424	1.1811	1.3654	1.6898	1.3831	1.1972	1.1752	1.0005
7.8	1.3045	1.3424	1.2305	1.827	1.6846	1.3719	1.42	1.1136	0.8853	1.2448	1.0269	0.9834	1.3729	1.5443	1.1442	1.2182	0.9722	1.4041	1.3976	1.3724	1.3328	1.0431
7.9	1.365	1.1611	1.3525	1.8656	1.6889	1.5299	1.3559	1.1905	1.1052	1.1401	1.1445	0.9693	1.3397	1.3288	1.17	1.2937	1.1039	1.5135	1.3247	1.0885	1.1721	1.0827
8	1.3535	1.415	1.473	1.8385	1.4762	1.6484	1.2842	1.1431	0.9733	1.2804	1.0823	0.9189	1.3719	1.2876	1.2506	1.2409	1.2896	1.6075	1.2893	1.0956	1.161	1.1335
8.1	1.2493	1.2593	1.35	1.9202	1.5438	1.4877	1.3344	1.094	1.0465	1.1774	1.2671	0.973	1.2222	1.2824	1.0835	1.0918	1.261	1.4903	1.5275	1.2354	1.2357	1.152
8.2	1.2753	1.6846	1.2532	2.1144	1.4866	1.8859	1.3383	1.0617	1.0827	1.5018	1.2973	0.918	1.3975	1.2419	1.2269	1.3423	1.2096	1.1208	1.3509	1.4454	1.2347	1.2171
8.3	1.2515	1.3871	1.2831	1.6518	1.6924	1.6674	1.5086	1.1963	0.9613	1.2919	1.2612	0.9374	1.3825	1.1896	1.2909	1.3597	1.1724	1.4491	1.5791	1.2537	1.333	1.0496
8.4	1.374	1.4828	1.3718	1.693	1.5794	1.4888	1.5018	1.3138	1.1863	1.3793	1.2306	1.1201	1.4444	1.218	1.0677	1.2257	1.3603	1.602	1.3471	1.3534	1.2977	1.1357
8.5	1.2489	1.5941	1.3164	1.8054	1.5966	1.365	1.4821	1.1733	0.9953	1.3485	1.2547	1.3147	1.4561	1.4099	1.2023	1.1647	1.2202	1.4939	1.1144	1.1807	1.3824	1.0645
8.6	1.4774	1.2308	1.2494	1.7036	1.507	1.5731	1.3716	1.3168	1.0573	1.5073	1.1298	1.3915	1.4578	1.2221	1.0548	1.249	1.0886	1.4339	1.3814	1.1956	1.2845	1.2238
8.7	1.2653	1.5912	1.2857	1.9537	1.694	1.5972	1.5067	1.3202	1.0559	1.2338	1.2481	0.9722	1.2184	1.3374	1.1727	1.3977	1.2803	1.6787	1.409	1.2645	1.2006	1.0818
8.8	1.4133	1.4377	1.2775	1.8293	1.7122	1.4551	1.4653	1.2671	0.9833	1.2324	1.0629	1.1191	1.2507	1.234	1.2478	1.2776	1.2928	1.5373	1.2706	1.2326	1.3767	1.1643
8.9	1.3942	1.3938	1.2393	1.832	1.7845	1.8234	1.5498	1.2489	1.039	1.391	1.4385	1.0342	1.4403	1.3694	0.9923	1.3045	1.5332	1.257	1.4001	1.4401	1.3503	1.0362
9	1.2091	1.2862	1.2599	2.0133	1.7056	1.4334	1.4331	1.2577	1.0729	1.347	1.2646	1.0226	1.194	1.3381	1.2765	1.2508	1.3679	1.3793	1.6126	1.4375	1.4952	1.062
9.1	1.4728	1.2421	1.3269	1.9295	1.8997	1.3065	1.3662	1.2107	1.3357	1.4531	1.2969	1.3883	1.3835	1.1817	1.3584	1.2213	1.3069	1.2589	1.5491	1.4865	1.3868	1.1045
9.2	1.2875	1.348	1.3022	1.7777	1.7041	1.4624	1.3806	1.3706	1.023	1.2659	1.3329	1.1061	1.2621	1.1645	1.3757	1.1369	1.2192	1.2453	1.2925	1.4227	1.767	1.1027
9.3	1.3439	1.3859	1.5505	2.0453	2.0459	1.3013	1.4293	1.2681	0.8804	1.1898	1.0807	1.0757	1.5974	1.1966	1.2067	1.2715	1.2541	0.9976	1.8329	1.8395	1.2378	1.1222
9.4	1.2755	1.2424	1.358	2.0995	1.6797	1.2451	1.3128	1.2502	0.8638	1.3892	1.2248	1.0093	1.1853	1.3299	1.3457	1.307	1.3025	1.0544	1.4366	1.5846	1.2018	1.1123
9.5	1.4039	1.1486	1.3958	2.1639	1.7011	1.4111	1.5047	1.3102	1.0173	1.3098	1.3224	1.0383	1.3124	1.2539	1.2084	1.2558	1.3233	1.0203	1.5554	1.4439	1.4035	1.1592
9.6	1.4721	1.171	1.4651	1.9417	1.7466	1.3099	1.4383	1.2935	0.8934	1.2907	1.2161	1.2713	1.45	1.3752	1.3747	1.1981	1.2085	1.0705	1.3841	1.508	1.3403	1.0038
9.7	1.6091	1.226	1.3657	1.8587	1.8181	1.2863	1.4001	1.2037	0.9161	1.3731	1.2219	1.0203	1.3197	1.2392	1.0803	1.0838	1.157	1.3019	1.2186	1.6498	1.1854	1.2047
9.8	1.535	1.1161	1.333	1.7715	1.5234	1.3301	1.613	1.1762	0.9589	1.2468	1.1353	1.3281	1.526	1.4615	1.0271	1.168	1.2655	1.3075	1.6948	1.6255	1.3061	1.3686
9.9	1.6319	1.2211	1.4287	1.8752	1.5217	1.1046	1.4595	1.386	0.8578	1.1895	1.3508	1.1011	1.6411	1.2823	1.1589	1.1089	1.2436	1.4808	1.632	1.5942	1.1406	1.364
10	1.4884	1.2607	1.3005	1.8101	2.0132	1.0238	1.7265	1.4814	0.9516	1.5652	1.3927	1.0173	1.3739	1.4051	1.1726	1.1999	1.3305	1.6565	1.6007	1.5006	1.3815	1.4925
10.1	1.2535	1.3147	1.2513	1.9888	1.567	1.2555	1.7122	1.2726	1.0444	1.3	1.1954	0.9738	1.3965	1.2219	1.2619	1.2421	1.1734	1.2567	1.5047	1.8966	1.1581	1.4384
10.2	1.4121	1.4561	1.2408	2.1468	1.7502	1.2684	1.6036	1.2186	1.107	1.3966	1.2544	0.9803	1.2603	1.2885	1.2831	1.1272	1.2465	1.2827	1.6292	1.7257	1.1001	1.3146
10.3	1.4082	1.3142	1.208	1.9976	1.6189	1.1532	1.9204	1.3571	1.0795	1.0976	1.1743	1.2193	1.5618	1.5483	1.025	1.1534	1.2816	1.5913	1.4141	1.7719	1.1994	1.2131
10.4	1.3966	1.3108	1.2451	1.9911	1.7337	1.2211	1.6743	1.4097	1.0613	1.3406	1.343	1.0343	1.388	1.308	1.3725	1.1302	1.3676	1.257	1.5488	1.8277	1.4303	1.2711
10.5	1.425	1.5107	1.0829	1.8771	1.6797	1.225	1.4761	1.3372	1.0488	1.4772	1.3366	1.0612	1.337	1.257	1.0496	1.1337	1.1232	1.2836	1.4948	1.8212	1.1811	1.0554
10.6	1.3106	1.3019	1.1711	1.7036	1.6745	1.1962	1.5588	1.3604	1.282	1.2173	1.1253	1.0519	1.575	1.3402	1.2244	1.1782	1.2748	1.4413	1.4244	1.6613	1.3271	1.3817
10.7	1.2589	1.6132	1.2692	1.5776	1.539	1.384	1.4605	1.4241	1.1824	1.221	1.1424	0.9589	1.6259	1.2452	1.2148	1.2307	1.3916	1.7964	1.7593	1.3066	1.1522	1.2882
10.8	1.1909	1.3783	1.3129	1.9801	1.5515	1.168	1.4152	1.4468	1.1218	1.2934	1.2749	1.0992	1.5543	1.4108	1.2445	1.1811	1.2325	1.3897	1.8921	1.6505	0.9919	1.1958
10.9	1.2099	1.2598	1.4937	1.8752	1.5003	1.3056	1.356	1.4208	1.2494	1.2121	1.055	1.2215	1.3753	1.2915	1.1803	1.1725	1.5928	1.6239	1.8189	1.4247	1.0872	1.1466
11	1.3341	1.4533	1.2843	1.9699	1.5556	1.2132	1.3826	1.3343	1.4508	1.2947	1.1665	1.5308	1.8049	1.1625	1.096	1.0191	1.2174	1.54	1.761	1.5447	1.0251	1.2209
11.1	1.3507	1.4381	1.3131	2.2453	1.4875	1.2197	1.3851	1.1801	1.2402	1.2702	1.0819	1.3592	1.6037	1.2153	1.1937	1.077	1.2364	1.6862	1.7345	1.5605	1.0651	1.2549
11.2	1.3974	1.5445	1.6113	2.0401	1.4811	1.1897	1.5455	1.4315	1.0571	1.4156	1.1997	1.3793	1.5056	1.2937	1.0145	1.0478	1.1969	1.3955	1.7144	1.7247	1.1232	1.3288
11.3	1.3259	1.4727	1.3806	2.2993	1.3683	1.1771	1.2897	1.5309	0.8793	1.2252	1.2032	1.5624	1.3716	1.2795	1.2653	1.1974	1.0726	1.5788	1.6969	1.7078	1.1237	1.4126
11.4	1.4495	1.3618	1.4375	2.2818	1.3901	1.2064	1.4026	1.5098	1.4078	1.3784	1.2364	1.3514	1.4999	1.3818	1.2941	1.3736	1.1745	1.5889	1.5335	1.4571	1.2169	1.4019
11.5	1.584	1.5024	1.4029	2.3563	1.5047	1.2733	1.4448	1.6699	1.2304	1.2859	1.2525	1.2754	1.3795	1.4294	1.1605	1.2357	1.4706	1.809	1.3923	1.5657	1.281	1.1887
11.6	1.4965	1.5909	1.5495	2.0079	1.7513	1.2612	1.3208	1.5438	1.1635	1.2671	1.1157	1.2893	1.4347	1.3815	1.2419	1.15	1.1518	1.6755	1.3719	1.7288	1.1272	1.2871
11.7	1.2889	1.4934	1.5035	2.1327	1.5484	1.3203	1.504	1.528	1.1549	1.3329	1.2509	1.4283	1.7065	1.5156	1.0931	1.0488	1.3045	1.8962	1.4239	1.7199	1.2843	1.4593
11.8	1.1038	1.3948	1.4204	1.9245	1.8312	1.2478	1.4977	1.7186	0.9047	1.0621	1.3758	1.2752	1.3986	1.3823	1.4019	1.2499	1.4379	1.4917	1.4328	1.738	1.211	1.3381
11.9	1.2143	1.491	1.3572	2.6112	1.5832	1.3038	1.3968	1.5086	1.1177	1.288	1.2917	1.112	1.3751	1.2613	1.3165	1.31	1.442	1.4435	1.2544	1.6332	1.0086	1.2858
12	1.1355	1.8306	1.4181	2.5309	1.5779	1.2903	1.602	1.3901	1.1161	1.4462	1.3446	1.1433	1.4836	1.2859	1.0999	1.0935	1.4003	1.0807	1.4195	1.6021	1.2089	1.3738
12.1	1.1202	1.8477	1.4027	2.0663	1.7088	1.3693	1.6264	1.3454	1.403	1.4005	1.1138	1.5188	1.3878	1.4834	1.4593	1.2283	1.2849	1.4195	1.4081	1.8842	1.1713	1.3283
12.2	1.3119	1.8378	1.4692	2.1568	1.6065	1.2356	1.4409	1.2723	1.0333	1.257	1.1722	1.4857	1.7861	1.5684	1.3026	1.1609	1.2371	1.3903	1.3623	1.9256	1.2228	1.2753
12.3	1.3135	1.6427	1.4415	2.144	1.7836	1.1888	1.5086	1.3435	1.1194	1.3921	1.2885	1.2138	1.7302	1.4044	1.3214	1.2422	1.3334	1.3943	1.465	1.8831	1.2867	1.3469
12.4	1.4132	1.4515	1.1513	2.2869	1.7403	1.2158	1.506	1.2673	1.0644	1.1713	1.1412	1.1556	1.7733	1.4601	1.1392	1.1532	1.3348	1.6907	1.3803	1.8079	1.1811	1.2898
12.5	1.1054	1.7669	1.3777	1.8596	1.6675	1.4109	1.6455	1.184	0.9297	1.3862	1.2132	1.4311	1.6022	1.5276	1.2081	1.2426	1.7263	1.5915	1.728	1.8643	0.9854	1.3253
12.6	1.0454	1.6416	1.2392	2.4533	1.5192	1.2107	1.5281	1.36	1.2554	1.1844	1.2597	1.1889	1.5287	1.6268	1.5891	1.4146	1.3804	1.3988	1.7924	1.9404	1.1672	1.3064
12.7	1.1367	1.7311	1.2664	2.8025	1.5103	1.2053	1.5645	1.1978	0.909	1.2818	1.1239	1.2411	1.4415	1.6045	1.1661	1.4208	1.1719	1.6312	1.7404	2.0269	1.1933	1.3123
12.8	1.2224	1.6502	1.6046	2.8492	1.4202	1.2618	1.4939	1.2897	1.1584	1.2781	1.1888	1.3052	1.805	1.5773	1.0818	1.1295	1.5523	1.3975	1.4651	1.999	0.9476	1.3643
12.9	1.2813	1.7886	1.5631	2.5719	1.7678	1.3019	1.5163	1.5873	0.9677	1.1287	1.1848	1.2056	1.6614	1.6083	1.4756	1.1703	1.7387	1.3155	1.6251	2.1262	1.106	1.1555
13	1.3524	1.7778	1.3751	3.1064	1.712	1.2178	1.597	1.4618	0.8731	1.2663	1.1925	1.3019	1.6883	1.4153	1.1967	1.2242	1.2977	0.998	1.286	1.9652	0.9421	1.2555
13.1	1.2028	1.587	1.4041	2.7025	1.4667	1.3391	1.528	1.3415	0.7812	1.1444	1.2044	1.3049	1.701	1.395	1.3124	1.1705	1.2274	1.1224	1.2294	1.8977	1.2044	1.3038
13.2	1.2264	1.5381	1.4813	2.92	1.4455	1.2945	1.5889	1.5807	1.0385	1.2195	1.1237	1.4281	1.6482	1.6728	1.3912	1.1026	1.2921	1.0203	1.616	1.8997	1.0894	1.3737
13.3	1.267	1.4015	1.2743	2.5597	1.5264	1.2105	1.6261	1.5516	0.9159	1.1404	1.2609	1.3869	1.4809	1.3687	1.3148	1.2619	1.2607	1.0198	1.4437	2.0256	1.0322	1.2517
13.4	1.3439	1.3365	1.4545	2.6298	1.4891	1.1002	1.5721	1.2764	0.804	1.3218	1.2749	1.2367	1.3843	1.5023	1.2655	1.1051	1.4476	1.0969	1.0885	1.9159	1.3462	1.3071
13.5	1.3822	1.7063	1.5009	2.4208	1.4643	1.206	1.4858	1.4393	0.8192	1.3327	1.2179	1.3678	1.5443	1.5898	1.1196	1.1456	1.3914	1.0429	1.6322	1.7708	0.8879	1.2741
13.6	1.3193	1.5181	1.5224	2.541	1.49	1.1381	1.6186	1.5403	1.1527	1.2776	1.2336	1.4709	1.4115	1.5521	1.1356	1.0358	1.3332	1.107	1.5159	1.7261	1.042	1.1903
13.7	1.1907	1.952	1.5167	2.718	1.4714	1.161	1.6359	1.2782	0.9292	1.2357	1.2089	1.3688	1.5421	1.4701	1.2129	1.0812	1.3177	1.1428	1.2221	1.8195	1.2221	1.2187
13.8	1.2676	1.7681	1.5882	2.9149	1.5383	1.295	1.6807	1.3867	0.9485	1.3656	1.2116	1.4959	1.4954	1.4945	1.2017	1.1395	1.4045	1.043	1.5263	1.7753	1.169	1.2093
13.9	1.0874	1.3845	1.3067	2.9086	1.5679	1.2455	1.6212	1.4917	0.9094	1.2603	1.2534	1.6122	1.1513	1.4037	1.3798	1.0237	1.323	1.3512	1.5724	1.9131	1.1288	1.2418
14	1.2591	1.7061	1.4607	2.9479	1.5326	1.1042	1.6458	1.4793	1.1998	1.2249	1.1375	1.3801	1.3574	1.6627	1.3042	1.2395	1.5538	1.2879	1.2556	1.8836	1.0741	1.095
14.1	1.1736	1.7358	1.5978	2.9028	1.4436	1.4125	1.5672	1.5591	1.0904	1.237	1.0403	1.4793	1.3181	1.4526	1.6587	1.2346	1.4981	1.3444	1.7468	2.089	1.2328	1.2311
14.2	1.1874	1.8385	1.4736	2.5813	1.4788	1.1448	1.5667	1.2761	1.1808	1.2829	1.2774	1.5756	1.5276	1.233	1.6138	1.155	1.6951	1.2636	1.4831	1.877	1.4632	1.2133
14.3	1.3592	1.9477	1.543	2.7886	1.647	1.334	1.5701	1.5192	0.9713	1.3637	1.1057	1.5869	1.3941	1.2921	1.8522	1.2148	1.6934	1.2309	1.6584	1.8231	1.4666	1.3788
14.4	1.3859	1.8153	1.4503	2.9246	1.637	1.261	1.6154	1.4925	0.9917	1.3286	1.1938	1.4008	1.2247	1.3763	1.6975	1.0931	1.5014	1.1296	1.3986	1.6936	1.2939	1.5305
14.5	1.3975	1.7649	1.6661	3.1442	1.3889	1.2262	1.7502	1.3753	0.8044	1.1152	1.1867	1.4323	1.4157	1.2759	1.9906	1.0652	1.7899	1.1713	1.3121	1.6959	1.4254	1.2286
14.6	1.3861	1.6473	1.4771	2.9057	1.4153	1.2118	1.8297	1.2946	1.0195	1.06	1.0373	1.4059	1.6253	1.3924	1.8139	1.1324	1.4288	1.1468	1.1784	1.6327	1.2348	1.1904
14.7	1.432	1.7056	1.2828	2.9079	1.4552	1.2419	1.8144	1.3321	0.9689	1.2284	1.2438	1.3954	1.3825	1.4226	1.8561	1.0689	1.6431	1.4502	1.4056	1.85	1.3187	1.1838
14.8	1.2175	1.9121	1.2636	2.6391	1.4846	1.2473	1.809	1.4613	0.9075	1.2039	1.0704	1.6169	1.5022	1.5042	2.08	1.1972	2.0134	1.1939	1.2408	1.867	1.3901	1.2591
14.9	1.2626	1.8234	1.2985	2.7606	1.3289	1.1094	1.6794	1.2627	0.9271	1.3022	1.0576	1.4506	1.2882	1.4704	1.3708	1.1522	1.7799	1.1078	1.2957	1.8194	1.576	1.3099
15	1.1001	1.8252	1.5036	2.7742	1.4578	1.227	1.706	1.3542	0.9165	1.1446	1.1153	1.6972	1.5964	1.4146	1.4861	1.137	1.8783	1.2349	1.2265	1.9353	1.0965	1.3362
15.1	1.3074	1.8813	1.3468	2.9568	1.6415	1.3961	1.7595	1.1337	0.9964	1.1512	0.9843	1.5925	1.5631	1.4115	1.758	1.2508	1.9609	1.0358	1.2385	1.9664	0.9855	1.3021
15.2	1.2859	2.1343	1.2387	2.7346	1.5261	1.2293	1.6113	1.3104	0.9673	1.1896	1.0543	1.6178	1.5986	1.2332	1.4923	1.2841	1.9493	0.9987	1.4343	1.8899	1.0999	1.33
15.3	1.2717	1.6328	1.2754	2.7804	1.5663	1.1332	1.5622	1.4137	0.996	1.2136	1.1343	1.6938	1.7761	1.2087	1.827	1.2885	1.9909	0.9936	1.3518	1.9826	1.2771	1.3021
15.4	1.1556	1.7753	1.2241	2.9135	1.4117	1.2047	1.6325	1.2811	1.1026	1.1992	1.1449	1.4817	1.8514	1.3461	1.7845	1.2059	1.9617	0.9331	1.187	1.8705	1.2052	1.5609
15.5	1.3281	1.5859	1.5027	2.8514	1.5975	1.1451	1.6247	1.221	0.9172	1.2366	1.3551	1.6301	1.4456	1.3105	1.568	1.1476	1.7139	1.1557	1.0597	2.05	1.07	1.4574
15.6	1.2085	1.7187	1.228	2.6804	1.4543	1.3291	1.6036	1.3178	0.9178	1.2538	1.2912	1.7774	1.4572	1.2416	1.3989	1.1026	1.5716	1.1886	1.1419	2.2087	1.1164	1.4159
15.7	1.2866	1.7593	1.5013	2.5451	1.3333	1.4374	1.4579	1.0805	0.9152	1.0349	1.2724	1.5903	1.3507	1.4481	1.4774	1.3999	1.6474	1.1777	1.3173	2.1672	1.1375	1.366
15.8	1.098	1.277	1.3893	2.8111	1.4201	1.4157	1.8086	1.3557	0.9956	1.1479	1.1547	1.928	1.303	1.5405	1.8475	1.3046	1.5462	1.2508	1.2197	2.1382	1.1023	1.3782
15.9	1.1745	1.5777	1.4908	2.7802	1.4205	1.2517	1.6119	1.2138	0.9108	1.1001	1.2645	1.7466	1.3107	1.5818	1.6015	1.2366	1.4527	1.0809	1.619	2.2061	1.1447	1.278
16	1.2718	1.4499	1.3733	2.9037	1.4597	1.2941	1.633	1.4461	0.9392	1.4205	1.148	1.5283	1.602	1.4911	1.8398	1.4933	1.6662	1.1291	1.6153	2.0466	1.1017	1.3405
16.1	1.4055	1.7069	1.2405	2.8779	1.5852	1.5081	1.6715	1.3383	0.8857	1.397	1.4322	1.8573	1.415	1.5378	1.6481	1.2378	1.6818	1.1439	1.2733	2.0308	1.1264	1.269
16.2	1.3316	1.5659	1.3552	2.794	1.3821	1.5129	1.5565	1.1832	0.9245	1.2506	1.7013	1.9659	1.2377	1.5787	1.3474	1.1388	1.547	1.11	1.5358	2.1528	1.2129	1.2116
16.3	1.3099	1.5505	1.3013	2.5298	1.4871	1.2419	1.6378	1.3164	0.955	1.1884	1.5786	1.6142	1.5058	1.6311	1.717	1.3041	1.4452	1.0423	1.2801	2.1396	1.0604	1.3611
16.4	1.2622	1.5585	1.3584	2.8569	1.4027	1.251	1.6189	1.2499	0.9788	1.3355	1.6018	1.6355	1.5304	1.5846	1.6843	1.1047	1.6302	1.029	1.3044	2.0431	1.1437	1.3631
16.5	1.368	1.3189	1.3678	2.8923	1.5879	1.2991	1.6324	1.2472	0.7952	1.1575	1.5549	1.7703	1.4499	1.4306	1.7887	1.2292	1.6979	1.1593	1.1732	2.1119	1.0555	1.2414
16.6	1.2414	1.2691	1.4509	2.7978	1.3654	1.2443	1.6106	1.159	0.8883	1.293	1.4862	1.6162	1.5735	1.5506	1.407	1.0838	1.7184	1.0714	1.6174	2.0245	1.1592	1.2879
16.7	1.2619	1.1015	1.4967	2.7836	1.4283	1.5782	1.7726	1.4832	0.8922	1.1686	1.3829	1.4685	1.5181	1.3348	1.4987	1.0511	1.7623	0.9529	1.3273	1.9901	1.3429	1.0339
16.8	1.4511	1.2424	1.4814	3.0382	1.6468	1.5653	1.6862	1.2164	0.8788	1.1894	1.213	1.4236	1.7742	1.4275	1.853	1.2035	1.8746	1.2869	1.3656	2.2498	1.1003	1.2066
16.9	1.3612	1.5246	1.5274	2.5192	1.5917	1.3469	1.6249	1.171	0.9198	1.0869	1.2684	1.4361	1.2975	1.4077	1.6469	1.3429	1.8524	1.1045	1.5045	2.1892	1.1603	1.3383
17	1.4487	1.5298	1.4346	2.4759	1.4895	1.3411	1.7711	1.2626	0.9025	1.2198	1.4851	1.4987	1.724	1.5173	1.595	1.2182	1.9162	1.0044	1.4027	2.1905	1.3787	1.2184
17.1	1.522	1.3392	1.4373	2.6837	1.5516	1.3638	1.6322	1.3353	0.918	1.2233	1.3222	1.5063	1.5224	1.2961	1.8403	1.3223	1.9084	1.105	1.3576	2.1387	1.2973	1.381
17.2	1.6106	1.2741	1.3982	2.4965	1.6842	1.3784	1.6893	1.2328	0.8043	1.1148	1.5834	1.3996	1.4669	1.4145	1.4296	1.329	1.7767	1.2133	1.4121	2.1152	1.3145	1.3368
17.3	1.4098	1.605	1.5853	2.6107	1.642	1.3829	1.6112	1.1355	0.9317	1.2648	1.3391	1.6857	1.4316	1.2181	1.8435	1.208	1.8487	1.0296	1.198	2.3279	1.4506	1.367
17.4	1.5577	1.63	1.5277	2.9138	1.5729	1.284	1.8323	1.1635	0.8965	1.2749	1.1265	1.5718	1.5787	1.4521	1.8839	1.1846	1.8902	1.0858	1.1737	2.0688	1.3919	1.3123
17.5	1.4143	1.949	1.3556	2.8432	1.5097	1.3158	1.7385	1.286	0.8618	1.2514	1.7357	1.5319	1.7699	1.5151	1.5043	1.1128	1.6072	1.1713	1.2	2.096	1.3929	1.2459
17.6	1.7157	1.5156	1.4725	2.8853	1.5313	1.4604	1.7012	1.2193	0.8194	1.2617	1.1238	1.5002	1.4047	1.4659	1.4615	1.0766	1.6999	1.0998	1.324	2.0211	1.4521	1.3492
17.7	1.5809	1.7104	1.4007	2.7981	1.5291	1.3788	1.7217	1.3019	0.9801	1.2008	1.5507	1.7222	1.438	1.3566	1.3699	1.2718	1.6844	1.1029	1.3428	2.1942	1.3843	1.3685
17.8	1.6356	2.1333	1.4774	2.6343	1.4038	1.387	1.5118	1.0048	0.8944	1.1556	1.319	1.687	1.662	1.4057	1.3016	1.1913	1.5803	1.1904	1.3006	1.9399	1.2848	1.299
17.9	1.5833	1.85	1.6372	2.5423	1.5328	1.44	1.6771	1.0868	0.8518	1.2473	1.4862	1.5164	1.4702	1.6246	1.5304	1.1993	1.564	1.1424	1.3512	2.2505	1.1644	1.2454
18	1.5434	1.6647	1.3762	2.4755	1.6516	1.2512	1.8776	0.977	1.0242	1.1419	1.7107	1.3541	1.3668	1.4801	1.8362	1.2327	1.6587	1.0374	1.2459	2.0739	1.1715	1.2138
18.1	1.485	1.9357	1.2893	2.8783	1.5646	1.2486	1.7001	1.2227	0.8715	1.065	1.3175	1.6275	1.4615	1.477	1.397	1.1393	1.7651	1.1459	1.306	2.1421	1.1345	1.41
18.2	1.6894	1.5952	1.3774	2.9615	1.5248	1.0819	1.6079	1.1886	0.7778	1.0397	1.6252	1.5693	1.4924	1.4798	1.5753	1.2239	1.8381	1.1983	1.2029	2.1716	1.0175	1.3621
18.3	1.6312	1.6569	1.3878	2.8268	1.6145	1.3398	1.5042	1	1.3899	1.1002	1.4864	1.5176	1.7301	1.4479	1.3044	1.1445	1.6712	1.1556	1.2507	2.1596	1.663	1.5146
18.4	1.5061	1.6781	1.3732	2.2618	1.4612	1.2082	1.6656	0.9134	0.9941	1.1529	1.5901	1.6187	1.4294	1.5242	1.4722	1.1409	1.4946	1.0067	1.36	2.2463	1.5461	1.3156
18.5	1.3593	1.3986	1.3971	2.5619	1.3641	1.2768	1.5798	1.1787	1.0484	0.9685	1.2096	1.5357	1.4222	1.3144	1.4835	1.1395	1.6991	0.9768	1.1887	2.2128	1.3524	1.284
18.6	1.4422	1.7372	1.4495	2.8792	1.4633	1.2596	1.6542	1.177	1.2116	1.026	1.2135	1.6657	1.3811	1.4093	1.282	1.2457	1.754	1.0605	1.2835	2.0543	1.575	1.2077
18.7	1.4767	1.5997	1.3876	2.5585	1.3879	1.3261	1.4341	1.1896	1.0375	1.1512	1.5069	1.6677	1.5208	1.5226	1.4586	1.5329	1.622	1.1038	1.6075	2.274	1.3313	1.35
18.8	1.3965	1.8123	1.1873	2.681	1.3422	1.1834	1.6115	1.0741	1.0598	1.0672	1.3421	1.7409	1.4778	1.3602	1.4854	1.2603	1.6668	0.8553	1.3264	2.4123	1.395	1.3476
18.9	1.4244	1.731	1.3247	3.3124	1.6748	1.3709	1.5171	1.1154	1.4423	1.0884	1.3951	1.5998	1.3892	1.3072	1.5141	1.2539	1.743	1.0576	1.0454	2.1158	1.4062	1.2428
19	1.2768	1.7554	1.2923	2.7875	1.5471	1.194	1.4766	1.1601	1.4786	1.1587	1.3659	1.6208	1.4934	1.2875	1.2658	1.4288	1.7647	0.9581	1.1584	2.2408	1.3606	1.1445
19.1	1.1761	1.9177	1.1112	2.825	1.382	1.212	1.594	1.2413	1.065	1.0261	1.3995	1.5537	1.5971	1.3248	1.2191	1.0872	1.4886	1.1187	1.0762	1.9619	1.4449	1.1425
19.2	1.193	1.7959	1.2297	2.9725	1.422	1.1342	1.4449	1.2196	1.0417	1.0158	1.0345	1.7081	1.4247	1.296	0.992	1.181	1.4926	1.0843	1.2134	2.1961	1.316	1.548
19.3	1.2317	1.92	1.5114	2.8411	1.6928	1.4491	1.504	1.1256	1.0015	1.1048	1.2553	1.5692	1.2896	1.3185	1.1078	1.119	1.698	1.0229	0.9656	2.0137	1.4887	1.3528
19.4	1.2124	1.9935	1.2842	3.1282	1.4186	0.8583	1.1036	0.9958	1.0496	0.8996	1.1554	0.8577	1.1598	1.0604	0.7639	1.0625	1.0471	1.1073	0.9541	0.8889	1.0116	1.2837	0.8967	1.3511	1.2455	0.8755	1.2889
19.5	1.2956	1.9338	1.1646	2.9164	1.4207	0.7548	1.3336	1.1007	0.8459	0.8369	0.9707	0.8611	0.851	1.2016	0.7701	1.0574	0.9667	0.9991	0.9055	1.0994	0.9313	1.4298	0.9	1.2668	1.011	0.8705	0.8663
19.6	1.3171	1.7526	1.3277	2.6927	1.5358	0.9771	0.9647	1.0605	1.2209	0.8158	0.995	0.9559	0.8965	0.8666	0.7062	1.2001	1.0557	1.1269	0.7679	1.0559	0.9238	1.1042	1.0333	1.1927	1.1032	0.874	1.1214
19.7	1.2121	1.8628	1.099	2.7665	1.6453	0.8187	1.2696	1.1608	1.314	1.0368	1.0703	0.8605	1.089	0.8906	0.6872	0.9568	0.9748	1.1881	0.9906	1.038	0.985	1.0875	0.9494	1.4067	1.3672	0.9425	1.0329
19.8	1.2062	1.7553	1.1589	3.1001	1.403	0.8915	1.3829	1.3815	1.1029	0.6467	1.1735	0.869	0.8404	0.9274	0.8669	0.9482	1.02	1.3812	0.9127	0.8974	1.2182	1.1573	0.9949	1.3182	1.4054	1.136	0.8852
19.9	1.2512	1.7249	1.249	3.0845	1.5829	0.9601	1.2445	1.3708	1.4353	0.8497	1.0683	0.883	0.9863	0.9994	0.7512	1.5699	1.0811	1.0997	0.9735	0.9313	1.033	1.3429	0.788	1.2025	1.5506	1.0627	0.9122
20	1.1546	1.8469	1.1515	2.7914	1.6068	1.0309	1.4198	1.4157	1.133	0.9272	1.0035	0.9748	0.8941	1.1446	0.8687	1.2958	0.9662	1.3266	1.2386	0.97	0.965	1.3127	0.8257	1.2381	1.1695	1.3505	1.1834
20.1	1.2447	1.9082	1.3374	2.7678	1.3847	0.9625	1.3457	1.2681	0.9728	0.8413	1.3128	0.7927	0.8954	0.9161	0.827	1.499	1.0521	1.2862	1.0249	0.977	0.9973	1.2963	0.801	1.1429	1.0452	1.1351	0.9972
20.2	1.205	1.9065	1.4295	2.7722	1.4186	0.961	1.0503	1.3281	1.0987	0.9956	1.1455	0.8488	0.9845	0.8334	0.874	1.502	1.2704	1.0845	0.9142	0.8859	0.878	1.3836	0.7605	1.1239	1.1697	1.3273	1.1633
20.3	1.228	1.7771	1.3607	2.9403	1.3773	0.9954	1.0484	1.0805	1.1763	0.8934	1.3283	0.8554	1.0021	1.0343	1.1659	1.2241	1.0783	1.5844	0.9443	1.0518	0.9418	1.0891	0.9301	1.222	1.3303	1.2544	1.1487
20.4	1.2076	1.7387	1.2492	3.0847	1.449	1.0739	0.9647	1.2057	1.1292	0.8827	1.5694	0.8395	0.9523	1.1071	1.093	1.3691	1.1155	1.1986	0.8242	1.0554	0.9251	0.9894	0.8711	1.2136	1.3926	1.2314	1.3112
20.5	1.1025	1.8836	1.3504	2.6117	1.3986	1.1364	1.075	1.1677	1.3322	0.9246	1.2301	0.8593	0.8951	1.0587	1.0969	1.2876	1.1479	1.2912	1.1767	0.9006	0.7856	1.223	0.8196	1.1141	1.5372	1.1091	1.5568
20.6	1.1326	1.6521	1.1645	2.791	1.3416	1.063	1.3777	1.3206	1.3853	0.8903	1.4674	1.0071	1.0611	1.0623	0.7724	1.0507	1.0341	1.3856	1.26	1.0089	0.8969	1.1332	0.886	1.1691	1.2182	1.0195	1.4109
20.7	1.034	1.8712	1.3193	2.7067	1.429	1.2106	1.3532	1.262	1.3789	1.074	1.2561	0.8792	0.9702	1.0398	0.9764	1.0777	1.1401	1.3726	0.9848	1.0668	1.0832	1.3529	1.0695	0.96	1.2358	1.0777	1.581
20.8	1.1659	1.877	1.2739	2.959	1.2668	0.9905	1.6294	1.0676	1.2758	0.8713	1.0993	0.8198	1.0589	0.9967	1.19	0.8981	1.1669	1.2999	1.0743	1.1604	1.2005	1.2222	0.9343	1.1678	1.3327	1.0316	1.3741
20.9	1.0638	1.8411	1.3388	3.0238	1.4013	1.1481	1.3767	1.3333	1.142	0.9276	1.356	0.8452	0.9428	0.918	0.9682	0.8714	1.0184	1.219	1.0209	0.8967	1.0326	1.0734	0.9121	1.3919	1.3199	0.8965	1.4336
21	1.0465	1.9294	1.3588	3.009	1.4381	1.0466	1.3809	1.2399	1.2785	0.8603	1.1212	0.9012	0.8244	0.8733	1.0839	0.9589	1.0845	1.2266	1.0817	1.0054	1.1091	1.0773	1.0586	1.4955	1.2044	1.2423	1.4232
21.1	1.1201	1.789	1.3403	2.9627	1.4249	1.1537	1.4047	1.2579	1.4842	0.8626	1.3106	1.09	0.8105	0.8541	1.2121	0.7838	1.0783	1.4186	1.1036	0.8543	1.1886	1.361	1.0163	1.5056	1.1494	1.1213	1.5727
21.2	1.0911	1.8595	1.339	3.212	1.3976	1.3026	1.489	1.0862	1.0029	0.9682	1.2301	0.8988	0.8149	0.8892	1.1441	0.9097	0.9832	1.211	1.1588	0.8188	1.1094	1.3676	1.0197	1.5963	1.1789	1.4954	1.6459
21.3	1.2531	2.2436	1.5104	2.8754	1.568	1.3782	1.6721	1.0832	1.2239	1.1948	1.2448	0.9504	0.9751	0.8932	1.102	0.894	1.1191	1.0354	1.1219	0.845	0.9365	1.225	0.953	1.5205	1.2807	1.1826	1.6718
21.4	1.2839	1.9743	1.4042	3.1175	1.3994	1.3326	1.5723	1.1596	1.1544	0.9683	0.9579	0.8834	0.9316	0.7596	1.2122	0.8608	1.1594	1.0081	0.8561	1.0122	1.0344	1.2816	1.4744	1.4948	1.2379	1.2814	1.8352
21.5	1.1463	1.9125	1.4227	2.844	1.3685	1.0156	1.5436	1.1998	1.2424	1.1211	1.0763	0.8632	0.8639	0.8168	1.1235	0.9154	1.1504	1.0779	1.0228	1.0633	1.0851	1.2852	1.3261	1.2493	1.1586	1.1888	1.7047
21.6	1.1725	1.8155	1.3081	2.6588	1.6237	1.064	1.5875	1.3908	1.0749	0.9359	1.0352	0.736	0.7892	0.882	1.239	0.9139	1.1074	1.0015	1.1186	0.7979	1.016	1.4045	1.5449	1.4545	1.288	1.1508	1.6023
21.7	1.1442	1.4676	1.2438	2.6296	1.2836	1.3922	1.5568	1.416	1.0364	0.8963	1.0784	0.8017	0.8213	1.0556	1.3083	1.2581	1.027	1.1623	1.1995	0.9844	1.2365	1.2461	1.3856	1.317	0.9888	1.1712	1.4102
21.8	1.4325	1.6233	1.448	3.347	1.1217	1.1379	1.6686	1.2918	0.7936	0.9492	1.0082	0.9494	0.8402	0.979	1.1175	0.8489	1.2317	0.9271	0.9194	1.0231	1.2622	1.1558	1.2622	1.4791	0.8951	1.1635	1.4756
21.9	1.1163	1.4603	1.4358	3.1423	1.2356	0.829	1.5566	1.3103	1.2269	0.9471	1.1822	0.8159	0.896	1.1526	1.2132	0.9595	1.169	0.8756	0.7352	0.9249	1.3011	1.2426	1.2731	1.4716	1.0013	1.5238	1.6652
22	1.2533	1.4752	1.4542	3.0901	1.2716	1.329	1.8524	1.3472	0.9863	0.8923	1.0881	0.8438	0.9351	0.7389	1.0593	0.9011	1.1614	0.9836	0.9616	0.9183	1.1407	1.0586	1.3934	1.6247	1.1881	1.3138	1.5433
22.1	1.3096	1.7083	1.1769	2.9763	1.334	1.2408	1.5908	1.3307	1.3626	1.0282	1.0369	0.9357	0.9519	0.9064	0.9654	0.9759	1.3795	0.993	0.9388	1.069	1.1542	1.2699	1.2014	1.4419	1.1153	1.3952	1.4575
22.2	1.4634	1.9864	1.2172	2.7182	1.1923	1.2241	1.645	1.4864	1.3177	0.9605	1.1064	0.9148	0.9881	1.0237	0.9413	0.9472	1.3426	1.1437	1.2519	1.0264	0.9495	1.3175	1.4869	1.3779	1.0756	1.2863	1.5546
22.3	1.4014	2.0632	1.285	2.6407	1.2594	0.9553	1.5156	1.3072	1.4043	0.8828	1.1343	1.08	1.0095	1.1124	0.8715	0.9637	1.16	1.3386	1.1533	1.1326	1.2503	1.2704	1.4983	1.3976	1.0788	1.3948	1.6559
22.4	1.5999	2.0146	1.2459	2.7563	1.2902	1.1267	1.7204	1.4955	1.1384	0.8999	1.331	1.0266	0.8493	0.9286	0.7625	1.0712	1.4936	1.1839	1.4917	1.0124	1.2441	1.1473	1.3985	1.416	1.0306	1.427	1.5939
22.5	1.2537	2.0799	1.2538	2.5768	1.51	1.194	1.6689	1.5394	1.2344	0.9263	1.3106	1.0501	0.8889	0.9452	0.9925	0.8983	1.5473	1.2541	1.6915	0.9751	1.0002	1.4374	1.6639	1.4195	0.98	1.1267	1.5855
22.6	1.387	1.6698	1.248	3.0304	1.4594	1.0133	1.6746	1.4826	1.0693	0.8458	1.363	0.9818	0.7374	0.9772	1.1066	0.9877	1.2555	1.1366	1.505	0.9775	1.0518	1.3558	1.4155	1.4718	1.0237	1.2969	1.5309
22.7	1.5842	1.7809	1.3095	3.1148	1.4674	1.2338	1.6624	1.3986	1.359	0.8729	1.4316	0.9972	0.8099	0.9823	1.25	0.9553	1.303	1.2172	1.6259	0.8937	1.3419	1.2785	1.4198	1.3103	1.143	1.3208	1.5018
22.8	1.4012	1.8325	1.3568	2.9952	1.4495	1.1318	1.6617	1.1236	1.3934	0.9004	1.1939	0.9683	0.8168	0.8889	1.146	0.965	1.3352	1.2255	1.6123	1.1741	0.9484	1.3534	1.3622	1.2694	1.05	1.4236	1.5485
22.9	1.4777	2.1206	1.3256	2.6761	1.3218	1.3834	1.3667	1.1828	1.021	0.8251	1.0858	0.9491	0.8154	0.829	1.0395	0.9207	1.4632	1.3689	1.4373	1.1634	0.9791	1.4219	1.1885	1.2079	1.0074	1.4304	1.2217
23	1.6174	1.8567	1.2738	2.6854	1.5517	1.4654	1.2483	1.5567	1.4331	0.8066	1.1787	0.954	0.9497	0.8919	1.272	1.0128	1.1963	1.2916	1.3882	1.0249	1.0435	1.5655	1.0466	1.648	1.1932	1.2197	1.3129
23.1	1.5348	2.037	1.4281	2.845	1.5165	1.5728	1.2186	1.001	1.1267	0.9907	1.1841	0.8441	0.8444	1.0652	1.178	0.8668	1.0826	1.2567	1.616	1.108	1.0177	1.3354	1.0513	1.8283	1.0843	1.3579	1.2329
23.2	1.488	1.8672	1.1781	2.7859	1.6303	1.4177	1.1473	1.3351	1.4046	0.8687	1.0952	0.8292	0.7978	0.8868	1.2109	0.9915	1.3137	1.4428	1.5977	0.9838	1.1539	1.1809	1.2072	1.3596	1.3287	1.5076	1.3184
23.3	1.5782	2.0434	1.4925	2.6561	1.4412	1.3376	1.3483	1.4998	1.4907	1.042	1.1607	1.0642	0.8467	0.8932	1.2262	1.2725	1.4505	1.2562	1.6476	1.0891	1.1213	1.2233	1.3102	1.3472	1.1717	1.2619	1.1478
23.4	1.4717	1.7709	1.13	2.5587	1.583	1.409	1.2396	1.4751	1.3086	0.8894	0.996	1.016	0.8029	0.8407	0.9648	1.1758	1.2648	1.5264	1.3725	0.8815	1.2142	1.2697	1.2305	1.4151	1.1331	1.3394	1.4098
23.5	1.3822	2.0406	1.2489	2.6153	1.5893	1.7372	1.3083	1.5794	1.2858	0.9286	1.2932	1.1858	0.8549	0.8923	1.0819	1.2167	1.3331	1.4471	1.5071	0.889	1.3226	1.3607	1.0522	1.6164	1.0827	1.2206	1.796
23.6	1.4867	2.3195	1.1397	2.8873	1.7424	1.5234	1.4383	1.5592	1.2687	0.9245	1.1167	1.0057	0.8409	1.0173	0.9912	1.1732	1.3934	1.4967	1.5142	0.9398	1.3488	1.5064	1.0823	1.3725	1.1204	1.1661	1.4421
23.7	1.2291	2.1675	1.2396	2.9312	1.5865	1.5874	1.4468	1.3521	1.3098	0.8745	1.3957	0.8513	0.8383	1.0202	1.0139	1.1649	1.2326	1.5501	1.6355	0.9928	1.1457	1.2494	1.0918	1.6514	1.0038	1.1179	1.4841
23.8	1.2967	1.8264	1.3457	2.9342	1.6296	1.5977	1.5458	1.4838	1.1033	0.9211	1.1611	1.0123	0.856	1.1871	0.9985	1.4752	0.9542	1.5363	1.6107	0.8727	1.1446	1.1637	1.1301	1.5594	0.8532	1.1375	1.3999
23.9	1.3807	1.7982	1.1924	3.169	1.7042	1.3319	1.7098	1.2684	1.2169	1.0613	1.1056	0.7729	0.9576	1.1387	0.8178	1.1621	1.0286	1.4151	1.4336	0.9946	1.1487	1.1859	1.2568	1.3412	0.9525	1.1362	1.4625
24	1.3838	1.9839	1.2331	2.9244	1.5188	1.4381	1.5577	1.4126	1.3402	1.0773	1.3684	0.8947	0.7723	1.365	0.9687	1.3046	1.3031	1.2512	1.8835	1.0927	1.2272	1.1926	1.1226	1.3741	1.1965	1.2133	1.428
24.1	1.3237	2.0422	1.0666	3.23	1.6475	1.5708	1.5444	1.4306	1.2453	1.0068	1.2517	0.7551	0.7732	0.9944	0.821	1.3997	1.1803	1.2042	1.6326	0.9813	1.2803	1.2881	1.1887	1.5975	0.959	1.1828	1.5066
24.2	1.4309	2.0612	1.295	2.7467	1.6753	1.391	1.4672	1.3735	1.4695	0.8483	1.274	0.7589	0.8671	1.075	0.9034	1.2824	1.1058	1.2382	1.6273	1.0978	0.9656	1.3966	1.1236	1.4705	1.0921	0.873	1.361
24.3	1.6184	1.9888	1.1353	2.6699	1.9478	1.2916	1.5833	1.47	1.2345	0.9832	1.1834	0.8769	0.9067	1.0882	0.9143	1.3747	1.178	1.1174	1.5864	1.1279	1.1201	1.418	1.1781	1.5874	1.0132	1.5244	1.4533
24.4	1.4817	2.116	1.3686	2.8831	1.6434	1.426	1.4349	1.3668	1.2732	0.9562	1.0888	1.0783	0.7765	1.0652	1.2535	1.3398	1.4495	1.2345	1.6618	0.861	1.0735	1.2303	1.3221	1.4667	0.9684	1.2039	1.4349
24.5	1.3963	2.0937	1.2716	2.8959	1.756	1.4331	1.4373	1.5557	1.6534	0.9623	1.1339	0.8653	0.9909	1.2515	1.3297	1.3392	1.4339	1.3676	1.379	1.5011	1.1704	1.3993	1.3929	1.4922	1.0494	1.5002	1.4319
24.6	1.4297	1.9947	1.2307	3.175	1.6881	1.3455	1.2908	1.447	1.5884	1.1454	1.2423	0.8091	0.7748	0.9406	0.9283	1.2631	1.4518	1.1471	1.3162	1.245	1.2541	1.3696	0.975	1.3572	1.1048	1.313	1.4772
24.7	1.4616	2.0086	1.0448	3.029	1.8062	1.4161	1.453	1.5744	1.2622	1.2233	1.1347	0.8675	0.8436	1.0921	1.0338	1.168	1.2109	1.2584	1.4813	1.308	1.1014	1.6686	1.0852	1.3445	1.231	1.1987	1.3878
24.8	1.2797	1.9176	1.4352	2.9715	1.8251	1.4947	1.372	1.3965	1.1206	1.0439	1.2357	1.0079	0.883	0.7807	1.1057	1.2913	1.6465	1.3178	1.3428	1.1507	1.1456	1.3974	1.0798	1.3354	0.933	1.1642	1.4287
24.9	1.2763	2.0114	1.2278	2.8272	1.8091	1.351	1.4872	1.2584	1.1413	0.9752	1.0758	1.109	1.051	0.8497	1.2593	1.5096	1.4231	1.2202	1.2241	1.0062	1.2866	1.3863	1.0879	1.3574	1.0636	1.3475	1.306
25	1.4593	2.0671	1.4146	2.7248	1.6442	1.3812	1.7176	1.3774	1.3435	1.2461	1.0563	1.1054	0.7883	0.8965	1.101	1.3314	1.3697	1.4228	1.3811	1.1259	0.9362	1.5488	1.2047	1.4289	1.0639	0.9268	1.2839
25.1	1.4804	1.9031	1.3432	2.8199	1.5218	1.3325	1.8255	1.3676	1.0398	1.0623	1.1198	0.8016	0.8044	0.9436	0.8421	1.152	1.4056	1.2605	1.2645	1.0011	1.1065	1.5399	1.2821	1.3642	1.0649	1.2194	1.2586
25.2	1.4946	1.8978	1.3089	2.9279	1.5687	1.3586	1.8099	1.6069	1.0648	1.2414	1.1476	0.9469	0.8235	0.7713	1.0977	1.2181	1.4908	1.39	1.5767	0.9629	1.2202	1.5334	1.1829	1.4666	1.1594	1.1485	1.2657
25.3	1.5791	1.7312	1.3637	2.972	1.4181	1.3516	1.5638	1.8051	1.022	1.1852	1.19	0.8851	0.9141	1.004	1.1826	1.2819	1.5697	1.3886	1.4907	0.976	0.9413	1.4605	1.1144	1.6112	1.26	1.4548	1.2887
25.4	1.4157	1.8157	1.506	3.0545	1.6207	1.3439	1.4569	1.7205	1.0994	1.0117	1.0975	1.0811	0.9143	1.0968	1.1471	1.0872	1.732	1.4006	1.6619	0.8921	0.9087	1.2711	1.1495	1.2945	1.1241	1.2161	1.2612
25.5	1.4283	1.9065	1.273	3.3893	1.5689	1.3742	1.378	1.7137	1.2671	1.1123	1.1046	1.0226	0.8519	0.7743	0.989	1.2865	1.4695	1.2791	1.7562	0.8842	1.1533	1.3511	1.1498	1.5137	1.1486	1.2531	1.3531
25.6	1.3643	2.0243	1.3915	2.7523	1.5009	1.4474	1.3723	1.5518	1.4379	1.0939	1.2176	0.8626	0.762	0.9172	0.8568	1.1908	1.692	1.2239	1.431	0.9176	1.2262	1.342	1.5458	1.4498	1.3224	1.0494	1.536
25.7	1.4744	2.0825	1.3424	2.9396	1.489	1.3301	1.4614	1.5705	1.3418	1.075	1.129	0.877	0.7637	1.0151	0.9984	1.1351	1.6376	1.3145	1.3981	1.0541	1.1083	1.322	1.373	1.5836	1.1052	1.1378	1.5019
25.8	1.5327	1.7539	1.4072	2.7026	1.5524	1.2733	1.335	1.4865	0.9294	1.0986	1.1486	0.7674	0.9658	1.1559	0.6933	1.4298	1.724	1.4762	1.303	0.938	1.1102	1.1739	1.1999	1.6012	1.2011	1.1326	1.5158
25.9	1.4054	1.8967	1.2707	2.7468	1.3834	1.4286	1.5568	1.5357	1.3311	1.0933	1.2616	0.8194	0.8584	1.1342	1.1117	1.4951	1.8795	1.3686	1.5434	0.9986	1.1572	1.4195	1.6268	1.4751	1.1232	1.2889	1.1991
26	1.467	1.9424	1.5532	2.8063	1.3109	1.3597	1.6426	1.4966	1.4775	1.2742	1.1412	0.8438	0.9605	1.046	1.2377	1.4185	1.6669	1.4961	1.1536	1.1068	1.0481	1.1055	1.6967	1.4702	1.1973	1.0755	1.5291
26.1	1.4994	1.8278	1.741	2.7457	1.3952	1.2236	1.4072	1.6868	1.2988	1.2086	1.2507	0.8439	0.9009	0.9414	1.0204	1.4275	1.5702	1.3633	1.3969	0.9058	0.8584	1.2531	1.5227	1.4098	1.0906	1.4569	1.4022
26.2	1.3472	1.8387	1.5594	2.5702	1.3946	1.0865	1.6761	1.6674	1.3197	1.0126	1.1671	0.7855	1.0031	1.0513	0.9683	1.4635	1.3424	1.5172	1.487	1.1726	1.1517	1.353	1.5843	1.3312	0.9917	1.3493	1.4348
26.3	1.5492	2.0049	1.5976	2.4892	1.4014	1.1402	1.7297	1.5216	1.3044	1.1321	1.1718	0.8488	0.8955	1.0965	1.1678	1.4121	1.3424	1.4676	1.344	1.0724	1.2178	1.2198	1.6488	1.4112	1.1141	1.0058	1.1982
26.4	1.4825	1.8774	1.4304	2.7623	1.3653	1.0788	1.4875	1.5799	1.2367	0.9453	1.1742	0.9678	0.7709	0.9474	1.0452	1.3927	1.4131	1.4288	1.5898	0.9556	1.0895	1.1951	1.4829	1.4553	1.2139	1.1326	1.4123
26.5	1.3799	1.96	1.6135	2.8846	1.4651	1.1792	1.8079	1.7175	1.3111	1.0702	1.1124	0.9844	0.8489	0.8521	1.0862	1.1255	1.4217	1.4574	1.2899	1.0627	1.2362	1.1988	1.6367	1.5216	1.1127	1.1176	1.3255
26.6	1.5306	2.1143	1.5465	2.7302	1.2696	1.1695	1.6748	1.6909	1.2707	1.0677	1.1845	1.1251	0.8943	1.0859	1.2105	1.2168	1.3799	1.5968	1.4467	1.1077	1.2753	1.2172	1.8145	1.5159	1.0981	1.2631	1.4288
26.7	1.4015	1.8779	1.3668	2.763	1.4111	1.2902	1.5327	1.4841	1.3057	1.0363	1.1653	1.1775	0.7436	0.9202	1.2358	1.5012	1.5447	1.6166	1.4202	0.9791	1.136	1.2742	1.5674	1.7593	1.0225	1.3435	1.5733
26.8	1.3922	1.8569	1.4869	2.6422	1.3439	1.0872	1.6328	1.5541	1.3724	1.0275	1.1671	1.1138	0.8744	0.9672	1.0007	1.2758	1.2425	1.2047	1.2562	0.9267	1.2616	1.3856	1.6078	1.6066	1.2856	1.2361	1.4622
26.9	1.3297	2.0485	1.6049	2.5822	1.3986	1.223	1.6068	1.4845	1.3724	1.1806	1.2462	1.1753	0.955	1.1452	1.0314	1.2182	1.2924	1.4756	1.2041	0.8759	1.1868	1.4161	1.4062	1.701	1.1646	1.2698	1.2679
27	1.279	2.0084	1.7075	2.4891	1.4621	1.1633	1.8076	1.693	1.2487	1.2372	1.2802	1.0334	0.9108	1.2552	1.073	1.2425	1.3303	1.3665	1.5888	0.9943	1.1918	1.475	1.4276	1.5006	1.1277	1.3678	1.3115
27.1	1.439	1.9314	1.4615	2.5302	1.4543	1.2948	1.7701	1.6552	1.0605	1.1565	1.221	1.0545	0.9489	1.2726	0.909	1.3969	1.3611	1.3848	1.6383	0.9317	1.2173	1.5144	1.5269	1.6197	1.2071	1.2597	1.2758
27.2	1.433	1.927	1.5231	2.7991	1.4908	1.4347	1.7683	1.3194	1.3629	1.0601	1.2807	0.9381	0.9259	0.9686	1.3668	1.4879	1.3075	1.4218	1.5038	0.9192	1.2368	1.4133	1.5203	1.3088	1.2859	1.3888	1.1797
27.3	1.3176	1.9388	1.4698	2.7263	1.3163	1.4255	1.5429	1.3557	1.0847	0.9896	1.2925	0.9848	0.7427	1.1523	1.2391	1.2651	1.633	1.532	1.5579	1.0771	1.2639	1.5	1.2899	1.3301	1.2671	1.4324	1.2605
27.4	1.5639	2.0263	1.5356	2.4728	1.3724	1.3785	1.7396	1.2634	1.446	1.0528	1.3256	0.8144	1.0182	1.1257	1.0925	1.4783	1.4675	1.4192	1.5002	1.1949	1.0359	1.1693	1.1374	1.5293	1.0301	1.1554	1.2828
27.5	1.6839	2.0743	1.436	2.6701	1.3721	1.5907	1.624	1.2142	1.2643	1.0717	1.3387	1.0944	0.874	1.0919	1.1761	1.3194	1.3824	1.3868	1.3859	1.2032	1.1449	1.4031	1.4914	1.0504	0.9491	1.3432	1.1668
27.6	1.4335	2.4482	1.5308	2.5908	1.3903	1.5847	1.562	1.2828	1.4067	1.1347	1.3193	1.0488	0.7442	0.8732	1.2092	1.2611	1.5129	1.1537	1.6768	1.4628	1.1252	1.4494	1.4616	1.3371	1.1068	1.4766	1.1974
27.7	1.2386	1.9981	1.3888	2.8376	1.3743	1.5358	1.7308	1.1626	1.3172	1.1649	0.9978	0.9297	0.8505	1.1488	1.099	1.5657	1.6003	1.323	1.4802	1.3033	1.0285	1.2668	1.2762	1.4651	1.1445	1.6246	1.3696
27.8	1.2772	2.2524	1.3884	3.0927	1.4855	1.4416	1.4825	1.3277	1.5134	0.9484	1.2992	0.9529	0.8151	1.2989	1.3373	1.5116	1.5486	1.4987	1.6675	1.239	0.9839	1.5954	1.4019	1.623	1.2789	1.5869	1.548
27.9	1.4249	2.0257	1.7292	3.1965	1.3251	1.6034	1.6503	1.2207	1.3654	1.0787	1.2546	1.0483	0.8029	1.1224	1.1285	1.5595	1.4831	1.4156	1.386	1.7064	1.1824	1.3753	1.3301	1.3252	1.1724	1.6188	1.2997
28	1.5591	1.9079	1.5357	2.7691	1.4133	1.448	1.3654	1.3669	1.4943	1.2195	1.0651	1.1585	0.8128	1.0279	1.0262	1.5371	1.5239	1.3964	1.4024	1.5111	1.1959	1.3342	1.3392	1.5342	1.1673	1.2788	1.2096
28.1	1.3564	2.2123	1.4171	2.7779	1.4564	1.5165	1.3721	1.428	1.3842	1.1995	0.936	1.4024	0.8521	1	0.9872	1.4138	1.4856	1.379	1.1809	1.3556	1.1889	1.3419	1.4301	1.4766	1.1267	1.1509	1.4764
28.2	1.33	2.0429	1.7083	2.7055	1.4258	1.4177	1.658	1.1784	1.5475	1.1153	1.1842	0.9885	0.8441	0.9911	1.0191	1.5145	1.605	1.3501	1.3718	1.1814	1.0374	1.3328	1.2475	1.5	1.0989	1.2062	1.2371
28.3	1.7668	1.8742	1.2915	2.8088	1.4389	1.3439	1.6035	1.1717	1.3303	1.0906	1.1401	1.3504	0.9612	0.8726	1.0496	1.529	1.5003	1.4224	1.3802	1.2084	1.1883	1.3573	1.3874	1.4775	1.1834	1.095	1.3749
28.4	1.4074	2.0341	1.3115	2.8866	1.4097	1.5346	1.39	1.3658	1.3904	1.1118	1.3678	1.133	0.8759	0.9332	1.218	1.6189	1.6819	1.226	1.2831	1.2226	1.1084	1.4874	1.3719	1.2973	0.9159	1.2219	1.5156
28.5	1.3099	1.9632	1.4192	2.1981	1.4276	1.6733	1.3272	1.4431	1.5396	1.1565	1.251	1.2169	0.934	1.1646	1.0077	1.5821	1.5764	1.1361	1.4904	1.2758	1.3616	1.3464	1.4734	1.4463	1.0256	1.1041	1.3492
28.6	1.4986	1.8222	1.3911	2.4429	1.4115	1.4814	1.5463	1.4857	1.1657	1.4591	1.3202	1.1603	0.7831	0.9235	0.9092	1.6496	1.4645	1.336	1.4242	1.0581	1.3998	1.131	1.2951	1.5082	1.2361	1.272	1.4462
28.7	1.535	1.5913	1.4125	2.5163	1.3055	1.3586	1.2477	1.5159	1.1746	1.3851	1.3582	1.1392	1.0721	0.7065	1.1441	1.6225	1.5841	1.2923	1.2933	1.1418	1.143	1.3972	1.3509	1.4598	0.9796	1.1973	1.4915
28.8	1.7466	2.0586	1.5073	2.8335	1.2868	1.4947	1.3783	1.4652	1.33	1.1594	1.2032	1.0982	0.8737	1.0002	0.9976	1.6683	1.3245	1.6061	1.3826	1.336	1.194	1.3442	1.3568	1.3366	1.226	1.0206	1.4076
28.9	1.746	2.013	1.5094	2.8669	1.5135	1.4873	1.2815	1.6284	1.4138	1.0962	1.1371	0.9175	0.8727	0.8712	0.9995	1.6034	1.5819	1.2212	1.2377	1.1362	1.3741	1.0918	1.4838	1.5191	0.9909	1.1299	1.4022
29	1.6227	1.7888	1.4896	2.6611	1.1959	1.5114	1.5091	1.6094	1.4168	1.1673	1.0158	1.0963	1.0038	0.8818	1.0743	1.3637	1.4848	1.5345	1.2599	0.8772	1.3619	1.5037	1.3533	1.4348	0.9657	1.1505	1.3232
29.1	1.5651	1.9385	1.3073	2.6631	1.1934	1.3951	1.6479	1.4631	1.3854	1.13	1.2354	1.1949	1.0097	0.9926	1.2059	1.8208	1.3705	1.5315	1.2682	0.9073	1.7108	1.1902	1.2148	1.4286	0.957	1.289	1.3568
29.2	1.9057	1.9315	1.3078	2.4031	1.3247	1.3866	1.4506	1.5864	1.3469	1.2684	1.2266	1.1487	0.9208	0.9959	1.104	1.3923	1.5518	1.4977	1.2751	1.0074	1.492	1.0997	1.2583	1.3686	1.1673	1.2394	1.3272
29.3	1.536	1.7126	1.3372	2.4202	1.2213	1.3342	1.2556	1.5521	1.4718	1.2195	1.202	1.0604	0.8425	1.0313	1.2415	1.5046	1.5969	1.614	1.0137	1.1252	1.5425	1.1503	1.2714	1.405	0.9061	1.4924	1.3968
29.4	1.5158	1.6769	1.3611	2.4271	1.2221	1.4999	1.7617	1.7774	1.498	1.4993	1.0056	0.9038	1.1398	0.9724	1.2139	2.0245	1.256	1.5098	1.2372	1.0971	1.4668	1.5656	1.3156	1.3338	1.0289	1.4911	1.3334
29.5	1.4386	1.9194	1.3565	2.3834	1.188	1.4909	1.516	1.4148	1.2039	1.2601	1.0006	1.0233	0.9493	0.8894	1.2376	1.7364	1.4427	1.4194	1.1635	1.1446	1.227	1.3768	1.1551	1.3615	0.9083	1.2691	1.2674
29.6	1.574	1.871	1.4107	2.4719	1.342	1.4715	1.2832	1.6309	1.3986	1.282	1.2939	0.8264	0.8841	0.8967	1.1089	1.651	1.4601	1.8033	1.3057	0.92	1.2723	1.279	1.3635	1.4307	0.9641	1.3793	1.4792
29.7	1.4797	1.8083	1.3206	2.5525	1.5731	1.5472	1.3823	1.3936	1.3994	1.2511	1.078	0.8737	0.8926	0.8389	1.1733	1.5714	1.3928	1.4572	1.2567	1.1135	1.1076	1.432	1.1994	1.5165	0.9347	1.5287	1.5818
29.8	1.436	1.9656	1.657	2.455	1.3302	1.2	1.3262	1.3176	1.6066	1.27	1.2508	1.0507	0.9	0.9423	0.8493	1.6229	1.4817	1.3605	1.0957	1.1044	1.1317	1.3635	1.3269	1.3719	1.0553	1.3609	1.7144
29.9	1.5429	1.8718	1.567	2.4834	1.1447	1.3935	1.5446	1.5366	1.4016	1.0875	1.1236	1.0655	0.9085	1.013	1.1058	1.5981	1.474	1.4306	1.2807	1.1192	1.3596	1.2901	1.4585	1.2677	1.0044	1.0522	1.5707
30	1.3624	1.699	1.4736	2.3464	1.1702	1.4673	1.3782	1.446	1.1198	1.0539	1.3291	1.0263	0.778	1.0781	0.9855	1.662	1.3614	1.3565	1.0195	1.0127	1.1442	1.1853	1.2307	1.3682	0.93	1.3177	1.4338
30.1	1.6916	1.6752	1.4435	2.7141	1.1719	1.1457	1.6212	1.6075	1.2363	1.2712	0.9823	1.0902	0.9295	1.1992	0.8935	1.5307	1.6518	1.5393	0.9175	0.9263	1.1465	1.2287	1.4925	1.3997	0.9644	1.3453	1.5141
30.2	1.2597	1.7298	1.4791	2.751	1.2258	1.5704	1.4784	1.6903	1.0483	1.5706	1.107	0.9201	0.987	1.1131	0.9902	1.5847	1.5428	1.656	1.0108	0.9544	1.4254	1.605	1.3763	1.477	0.8923	1.3624	1.3982
30.3	1.4791	1.7761	1.4208	2.6227	1.2107	1.3678	1.4786	1.3127	1.028	1.3991	1.1434	1.049	1.0359	0.9959	1.1955	1.8937	1.6692	1.4976	0.9317	1.0322	1.3924	1.426	1.2769	1.303	0.9714	1.1924	1.7098
30.4	1.2517	1.9131	1.3767	2.8264	1.2936	1.5388	1.6168	1.4352	1.1832	1.3631	1.0853	0.9341	0.981	1.1088	0.8788	1.749	1.2607	1.6407	1.0244	0.9555	1.3086	1.2097	1.2591	1.4552	1.0546	1.4386	1.6121
30.5	1.228	1.8267	1.5165	2.8182	1.3161	1.2345	1.6412	1.2668	1.2451	1.2685	1.2943	0.9016	0.9913	1.1306	1.0203	1.5315	1.5328	1.55	1.0412	0.9854	1.3647	1.2871	1.2828	1.7085	0.9274	1.4379	1.6497
30.6	1.4448	1.9191	1.4838	2.8758	1.2424	1.3971	1.5305	1.3778	1.1777	1.5717	1.0756	0.8352	1.0814	1.1372	0.9857	1.8788	1.5537	1.2925	1.1529	1.0104	1.5714	1.2546	1.4213	1.3881	0.8271	1.3422	1.3805
30.7	1.2223	1.9374	1.2844	2.9592	1.2649	1.5116	1.5116	1.5207	1.5009	1.6117	1.2292	0.7869	1.0732	1.1211	1.0347	1.8022	1.6411	1.4263	1.4336	1.0401	1.38	1.3069	1.305	1.4937	1.0167	1.4142	1.4125
30.8	1.0754	1.7327	1.4091	2.9145	1.2341	1.5172	1.2724	1.4757	1.1884	1.4019	1.3278	0.6757	0.9923	0.9905	1.0442	1.7956	1.5352	1.4081	1.0249	1.1322	1.13	1.3353	1.2937	1.4926	1.3195	1.5259	1.5728
30.9	1.3718	1.8506	1.4464	2.8197	1.5278	1.1874	1.4741	1.3978	1.3787	1.5921	1.2722	0.7758	0.8997	1.0021	1.127	1.9624	1.3791	1.2738	1.1269	1.0869	1.2686	1.401	1.4545	1.483	1.0679	1.4439	1.7408
31	1.3891	1.9921	1.4453	2.8869	1.2259	1.3914	1.3976	1.4429	1.0412	1.3584	1.0878	0.759	0.9594	1.0608	0.8527	1.8459	1.2526	1.1445	1.1625	0.8909	1.34	1.4461	1.411	1.5365	1.2258	1.3813	1.5378
31.1	1.344	2.0984	1.3598	2.9193	1.3124	1.4772	1.2577	1.7223	1.4516	1.3809	1.3048	0.8861	1.0079	1.1622	1.0885	1.6881	1.5474	1.2538	1.361	1.1504	1.0474	1.3899	1.3268	1.4578	1.161	1.3027	1.5903
31.2	1.4199	1.9892	1.2839	2.7274	1.3341	1.365	1.2414	1.676	1.522	1.3323	1.1894	0.8386	1.0102	1.2213	1.0347	1.7004	1.4287	1.4548	1.1526	1.065	1.1127	1.3194	1.5176	1.5089	0.9819	1.335	1.4652
31.3	1.303	1.9397	1.3767	2.9084	1.357	1.4695	1.5358	1.6198	1.3449	1.2997	1.1316	1.0184	1.0457	1.2771	0.9911	1.9059	1.3246	1.2862	1.2425	1.1344	1.1331	1.2244	1.3624	1.6378	1.4615	1.3934	1.4362
31.4	1.2777	1.9531	1.461	2.7978	1.1809	1.5313	1.5031	1.7879	1.536	1.5651	1.1543	1.0495	1.2068	1.1986	1.2304	1.5588	1.664	1.4535	1.2989	1.1174	1.1321	0.9936	1.4283	1.5665	1.2969	1.2278	1.2603
31.5	1.2619	1.9204	1.5708	2.5344	1.2174	1.3062	1.6656	1.439	1.651	1.5404	1.1717	0.9068	1.1092	1.017	1.0423	2.0578	1.3132	1.4032	1.0983	1.2391	1.1121	0.9699	1.4725	1.4486	1.334	1.2317	1.2566
31.6	1.1302	1.7134	1.3561	2.739	1.1682	1.4171	1.6299	1.4676	1.4265	1.4018	1.1882	0.7912	1.0653	1.1343	1.3137	1.6536	1.2672	1.3707	1.2066	1.2424	1.2582	1.4916	1.7287	1.5999	1.1765	1.3936	1.4278
31.7	1.1814	1.9308	1.5415	2.9293	1.238	1.3639	1.4288	1.6521	1.5298	1.3121	1.2184	0.8512	1.0108	1.1973	1.0974	2.2487	1.4986	1.5789	1.1833	1.3718	1.1426	1.7301	1.8061	1.5134	1.0696	1.1605	1.2892
31.8	1.7722	1.831	1.517	2.8271	1.3064	1.2661	1.4723	1.5512	1.4615	1.4124	1.2221	1.0679	0.9806	1.1128	1.0574	1.8164	1.8009	1.3545	1.2435	1.191	1.5187	1.2942	1.5534	1.5689	1.114	1.102	1.4404
31.9	1.618	2.0171	1.398	2.746	1.1639	1.5143	1.44	1.3585	1.5534	1.2679	1.1866	1.1681	1.1059	1.1454	1.0427	1.6627	1.514	1.4653	1.147	1.3073	1.1735	1.1376	1.571	1.7196	1.1308	1.1155	1.3978
32	1.1468	1.7967	1.4257	2.6588	1.0772	1.8163	1.3107	1.556	1.768	1.7544	1.1426	0.798	0.963	1.2161	1.0551	1.5183	1.3115	1.5414	1.0301	1.2633	1.2222	1.2058	1.5433	1.6668	1.1166	1.244	1.4891
32.1	1.1099	1.5903	1.4374	2.8601	1.1782	1.5997	1.4451	1.4458	1.6309	1.9569	1.2413	1.0288	1.0353	1.332	0.9881	1.7087	1.4879	1.6228	1.0727	1.3241	1.2068	1.3386	1.5701	1.6394	0.9812	1.3157	1.3435
32.2	1.2203	1.751	1.4442	2.8426	1.3737	1.6981	1.6121	1.2697	1.3974	1.8645	1.0435	1.034	1.0012	1.2907	0.9784	1.5081	1.3634	1.5209	0.9931	1.2417	1.169	1.4011	1.5255	1.335	1.0171	1.3787	1.4238
32.3	1.1418	1.9538	1.3852	2.9844	1.2831	1.4764	1.6235	1.4347	1.4221	1.6158	1.2068	0.8642	0.9782	1.2505	1.0635	1.4244	1.5231	1.5622	1.1627	1.3243	1.201	1.2806	1.4646	1.5796	1.0163	1.1908	1.3518
32.4	1.157	1.9744	1.4233	2.6467	1.1145	1.7702	1.7269	1.4828	1.6651	1.6102	1.1091	0.888	0.8886	1.4056	0.877	1.3881	1.3114	1.3754	1.1392	1.2222	1.1969	1.4704	1.4559	1.397	1.0395	1.1924	1.3101
32.5	1.1452	1.8492	1.5073	2.4751	1.3075	1.713	1.6884	1.5097	1.3613	1.6287	1.4445	0.918	0.926	1.4773	0.9566	1.4407	1.8661	1.5688	1.0904	1.3085	1.2143	1.2043	1.4578	1.2544	0.9831	1.3457	1.4985
32.6	1.2675	1.7143	1.4553	2.4324	1.2516	1.747	1.4754	1.4478	1.3303	1.8577	1.2343	0.9563	0.7502	1.3923	0.9639	1.4647	1.8948	1.4345	0.8533	1.4073	1.2864	1.3181	1.7145	1.4222	1.1321	1.4682	1.422
32.7	1.099	1.7907	1.5226	2.701	1.241	1.6425	1.4521	1.4955	1.4218	1.4817	1.3267	0.9757	0.7449	1.2582	0.9827	1.499	1.6167	1.6087	1.1426	1.283	1.2992	1.3091	1.9257	1.5321	1.0249	1.132	1.3048
32.8	1.2666	1.8141	1.6639	2.4741	1.1801	1.9413	1.4818	1.6104	1.241	1.6161	1.2939	0.9079	0.8399	1.451	1.0788	1.651	1.7799	1.7865	1.1503	1.191	1.2901	1.4934	1.7336	1.3655	1.0724	1.464	1.4056
32.9	1.3171	1.8799	1.4738	2.824	1.2211	2.0571	1.5269	1.5001	1.3619	1.7553	1.0926	1.108	0.876	1.3666	0.9778	1.672	1.7241	1.4896	1.221	1.2109	1.182	1.4505	1.6069	1.3926	1.0963	1.3433	1.5778
33	1.18	1.7717	1.4128	2.6515	1.2295	1.773	1.2985	1.3229	1.4425	1.6942	1.1121	1.0334	0.876	1.3581	1.0238	1.8843	1.8934	1.8027	1.1617	1.2411	1.0929	1.7392	1.7903	1.5476	1.1407	1.6743	1.9256
33.1	1.1726	1.6742	1.442	2.6047	1.2581	1.6376	1.5247	1.4396	1.3739	1.6143	1.1939	1.0349	0.919	1.6851	0.9619	1.6528	1.7958	1.5258	1.1844	1.2577	1.2453	1.4791	1.5528	1.3197	1.0645	1.5026	1.8796
33.2	1.1458	1.7157	1.7744	2.6554	1.38	1.9828	1.5617	1.4546	1.3979	1.4338	1.092	0.9334	0.9983	1.462	1.105	1.6478	1.8673	1.4439	1.0708	1.2193	1.189	1.6511	1.7262	1.246	1.1517	1.1406	1.5517
33.3	1.2238	1.5318	1.566	2.7974	1.3825	1.9622	1.6759	1.2697	1.3228	1.5306	1.2872	1.0495	0.9826	1.2768	1.1016	1.5927	2.1086	1.4056	1.0486	1.2563	1.13	1.4388	1.5645	1.2972	1.0188	1.2097	1.5914
33.4	1.1294	1.7388	1.4903	2.6124	1.5676	1.6449	1.4171	1.4486	1.6555	1.5341	1.0691	0.9637	0.9248	1.1189	1.0037	1.4913	2.2754	1.3567	1.0749	1.1381	1.1653	1.7341	1.5271	1.2582	1.1748	1.3087	1.3489
33.5	1.3967	1.5694	1.5645	2.8687	1.4868	1.6824	1.4588	1.6882	1.2181	1.554	1.2789	0.9383	0.8332	1.0215	1.0834	1.9206	1.9202	1.6454	1.1196	1.2097	1.0467	1.6123	1.5255	1.4735	1.0366	1.2092	1.5153
33.6	1.2016	1.8871	1.5019	2.8108	1.2678	1.8256	1.7507	1.4493	1.1929	1.5435	1.2006	0.9548	0.7487	1.1393	0.9691	1.7615	2.1845	1.5709	1.2207	1.219	0.8388	1.5777	1.5615	1.2892	1.2878	1.1097	1.307
33.7	1.0173	1.6877	1.616	2.6664	1.2085	1.8771	2.0216	1.5464	1.0726	1.4375	1.2397	0.8869	0.9996	1.1706	0.835	1.5664	2.3316	1.5616	1.1647	1.1648	1.2126	1.5682	1.6439	1.1229	1.1521	1.1981	1.2973
33.8	1.0523	1.7213	1.5431	2.8217	1.1951	1.6104	1.8023	1.3906	1.1467	1.7302	1.062	0.9834	0.9457	1.2252	1.028	1.2581	1.9989	1.4762	1.2424	1.1555	1.0941	1.6151	1.913	1.4733	0.911	1.0483	1.2861
33.9	1.1182	1.8715	1.4769	2.6786	1.1426	1.4999	1.7929	1.3993	1.2941	1.8639	1.1503	0.8918	0.9153	1.206	1.0033	1.4986	2.152	1.4967	1.1261	1.2184	1.2239	1.2797	1.5532	1.1287	1.0302	1.3629	1.2329
34	1.0163	1.6541	1.5325	2.6719	1.2491	1.5283	1.933	1.3828	1.3727	1.7259	1.1478	1.1967	0.928	1.4316	0.7892	1.7906	2.2169	1.4686	1.2751	1.3134	1.2276	1.1931	1.5715	1.1961	1.1665	1.1365	1.3093
34.1	1.1286	1.8201	1.4136	2.7126	1.173	1.6367	2.1934	1.5208	1.2946	1.7971	1.3148	1.0145	0.7862	1.4484	1.1085	1.5811	2.0936	1.2026	1.1019	1.3556	1.0487	1.2081	1.5282	1.2383	1.1208	1.5856	1.2562
34.2	1.0808	1.6492	1.3425	2.3791	1.2284	1.6922	2.1135	1.6146	1.2684	1.8484	1.2545	0.9367	0.9399	1.3333	0.9044	1.3798	1.7811	1.4201	1.0281	1.4554	1.144	1.0047	1.5241	1.323	1.0406	1.7618	1.3193
34.3	1.2493	1.9441	1.3495	2.6364	1.3891	1.443	2.0524	1.4656	1.4903	1.7525	1.3714	1.0942	0.9546	1.3953	0.9554	1.8188	2.0708	1.4587	1.0274	1.2061	1.031	1.332	1.3692	1.3443	1.1944	1.5605	1.3518
34.4	1.3332	2.0309	1.5137	2.4019	1.3225	1.6014	1.929	1.275	1.5045	1.7779	1.2538	0.9589	0.9135	1.017	0.9945	1.5865	1.902	1.4949	1.1861	1.4223	1.3065	1.1262	1.4072	1.1462	0.9928	1.7289	1.2628
34.5	1.2598	2.1054	1.4309	2.5108	1.2254	1.2036	2.2536	1.4381	1.394	1.893	1.1836	0.9547	1.0147	0.9865	0.9508	1.4043	1.6778	1.3731	1.0366	1.3444	1.1532	1.3746	1.3232	1.2134	1.0851	1.9666	1.0859
34.6	1.3963	2.0361	1.492	2.5615	1.2172	1.4633	1.9393	1.3468	1.2455	1.9455	1.1997	0.9597	1.0739	1.0984	0.9211	1.6165	1.781	1.1204	1.0772	1.1299	1.0082	1.2599	1.3646	1.2991	1.1198	2.063	1.2433
34.7	1.2747	2.1937	1.4916	2.5022	1.1753	1.6419	2.036	1.3074	1.2694	1.7321	1.4589	1.0492	1.0739	1.1927	0.8963	1.7087	1.916	1.2621	1.2974	1.3469	1.2175	1.2587	1.5869	1.2273	0.9927	1.5848	1.2533
34.8	1.4612	2.032	1.3232	2.4223	1.3128	1.4564	1.757	1.2657	1.1916	1.7099	1.2983	0.9563	1.1048	1.2674	1.0242	1.817	1.8236	1.3665	1.2653	1.1376	1.4103	1.2145	1.415	1.3475	1.0018	1.287	1.1313
34.9	1.2186	2.0336	1.486	2.3956	1.4081	1.5503	1.8097	1.2719	1.3505	1.779	1.1769	1.0416	0.9569	1.416	0.8172	1.3074	2.0085	1.4065	1.132	1.2538	1.2111	1.3657	1.2113	1.294	1.0256	1.3408	1.1642
35	1.2001	1.8683	1.5968	2.6879	1.4378	1.5778	1.7311	1.5331	1.3153	1.6704	1.1821	1.0477	1.1059	1.3431	0.7924	1.6322	2.0408	1.6719	1.0754	1.2348	1.3315	1.1422	1.3853	1.246	0.9352	1.5002	1.0819
35.1	1.3537	2.2801	1.4891	2.5551	1.3257	1.6874	1.6255	1.4876	1.192	1.647	1.2561	0.9733	1.095	1.1636	0.9518	1.4976	2.2865	1.4717	1.0914	1.5244	1.4353	1.1731	1.4989	1.4597	0.9167	1.4913	1.0723
35.2	1.2231	2.1222	1.4981	2.566	1.3699	1.6711	1.7347	1.3394	1.162	1.6862	1.2854	0.9565	1.1208	1.2606	0.9166	1.6607	2.0189	1.308	1.0008	1.5081	1.3407	1.1589	1.7314	1.4303	0.9846	1.3487	0.9336
35.3	1.2565	1.9457	1.6492	2.7914	1.1021	1.5972	1.7651	1.4452	1.4336	1.762	1.2883	0.9669	1.1031	1.1478	0.9199	1.7356	1.6016	1.3933	1.0445	1.3539	1.4254	1.255	1.6095	1.4583	0.9032	1.119	1.1546
35.4	1.2206	1.9514	1.4977	2.7611	1.2219	1.2725	1.677	1.2951	1.3568	1.7675	1.2508	0.9019	1.0738	1.2257	0.8149	1.6055	1.5816	1.1966	1.044	1.2395	1.2004	1.3298	1.5437	1.5275	0.869	1.2997	1.226
35.5	1.2285	2.0745	1.4151	2.6726	1.1941	1.5858	1.6733	1.244	1.6977	1.682	1.2003	0.9959	1.049	1.4274	0.8782	1.4751	1.9068	1.4958	1.1594	1.2606	1.3618	1.1514	1.5692	1.624	0.943	1.3416	1.2007
35.6	1.1065	2.1896	1.4502	2.5611	1.3414	1.3533	1.7179	1.0643	1.5316	1.6376	1.2195	0.9003	0.9654	1.3826	0.8521	1.6924	1.7395	1.4283	1.1549	1.2037	1.3412	1.227	1.5855	1.3323	0.9129	1.3036	1.2015
35.7	1.3205	2.1767	1.8709	2.568	1.555	1.4012	1.948	1.3621	1.5232	1.7522	1.2088	1.0454	1.0726	1.1403	0.8875	1.4485	1.8762	1.3238	1.1001	1.1273	1.4164	1.1563	1.5484	1.5156	0.9889	1.4809	1.1103
35.8	1.1224	2.3716	1.4952	2.5896	1.3272	1.3536	1.8965	1.426	1.6877	1.8717	1.2156	0.8839	1.1971	0.9823	0.7849	1.4773	1.926	1.4492	0.904	1.14	1.3274	1.2968	1.6642	1.513	0.9778	1.2895	1.1077
35.9	1.3232	2.0568	1.3464	2.8341	1.3818	1.5142	1.8978	1.2859	1.2816	1.8903	1.2032	0.9662	1.1297	1.3084	0.8379	1.4735	1.6563	1.5807	0.9379	1.0864	1.1247	1.1888	1.5035	1.3708	1.2011	1.3896	1.1319
36	1.1914	1.9023	1.3916	2.644	1.2543	1.6384	1.5591	1.364	1.2762	1.9068	1.2049	1.1608	1.1213	1.0762	1.0161	1.1636	1.4489	1.3573	1.0113	1.189	1.3341	1.219	1.7168	1.4177	0.8731	1.5088	1.2576
36.1	1.196	1.9736	1.5705	2.411	1.1764	1.4193	1.6478	1.1777	1.2328	1.7132	1.2163	1.2768	1.1854	1.337	1.0201	1.2959	1.568	1.6686	1.0418	1.1517	1.1694	1.1705	1.5903	1.2691	0.9791	1.4167	1.2877
36.2	1.3563	1.929	1.5782	2.52	1.2578	1.518	1.8057	1.4712	1.3702	1.7072	1.3398	1.088	1.1978	1.148	0.9195	1.2354	1.8581	1.2736	1.0701	1.0662	1.422	1.0831	1.602	1.0866	0.9659	1.4752	1.257
36.3	1.2877	1.9298	1.5982	2.6265	1.2181	1.5764	1.7817	1.2694	1.0022	1.562	1.1994	1.0869	1.1889	1.256	0.9501	1.3657	1.7197	1.2332	1.314	1.2203	1.4655	0.9584	1.3584	1.2627	1.2624	1.3762	1.1709
36.4	1.4223	1.9122	1.6388	2.5175	1.1462	1.6265	1.9504	1.194	1.2652	1.775	1.3496	1.4419	1.0945	1.164	0.891	1.5133	2.0129	1.343	1.0015	1.3059	1.4012	0.9955	1.6026	1.6225	1.2653	1.305	1.2457
36.5	1.2855	2.1046	1.4691	2.8786	1.401	1.6166	1.8234	1.317	1.0478	1.7974	1.2386	1.0849	1.1052	1.2939	1.1091	1.3824	2.256	1.4968	0.9864	1.4268	1.3359	1.1027	1.3904	1.2536	1.3569	1.5	1.2197
36.6	1.3454	1.8619	1.4637	2.9377	1.5767	1.6382	1.4873	1.4345	1.4691	2.0397	1.2575	0.9658	1.0484	1.2997	0.9237	1.5254	2.1602	1.3957	0.9877	1.4028	1.367	0.9775	1.5199	1.5233	1.2842	1.3897	1.1448
36.7	1.4291	2.0836	1.5387	2.8082	1.3863	1.4915	1.6245	1.25	1.3924	1.9677	1.2005	1.0512	1.1111	1.3635	0.8381	1.3897	1.819	1.1661	0.9465	1.3411	1.2676	1.027	1.4578	1.4772	1.3281	1.4456	1.158
36.8	1.2868	2.0308	1.788	2.4035	1.4798	1.4508	1.5386	1.4951	1.0314	2.0364	1.1468	1.0231	1.129	1.4048	0.8585	1.3035	2.1346	1.3634	1.0041	1.175	1.1233	1.1572	1.4025	1.7184	1.4126	1.6154	1.1841
36.9	1.2646	1.9844	1.8009	2.899	1.5933	1.4785	1.4556	1.257	1.5482	2.0293	1.2953	1.1793	1.0392	0.9962	0.8672	1.399	1.645	1.3131	1.0372	1.292	1.4325	1.0894	1.443	1.6374	1.1856	1.4212	1.2203
37	1.1244	1.9062	1.5042	2.9261	1.5798	1.4715	1.692	1.2321	1.2718	2.0812	1.5034	1.1953	1.2117	1.1546	0.9024	1.6367	1.8178	1.2035	0.9814	1.2468	1.3005	0.9722	1.6233	1.4361	1.285	1.2323	1.1736
37.1	1.2402	1.9414	1.6241	2.7544	1.48	1.2612	1.4826	1.2671	1.0995	1.9055	1.451	1.1194	1.2319	1.0671	0.9668	1.6916	1.7617	1.284	1.2507	1.6265	1.13	1.0059	1.5625	1.5199	1.2511	1.4537	1.2792
37.2	1.0421	1.7285	1.5409	2.8706	1.5193	1.3503	1.9745	1.2998	1.2977	1.9965	1.3201	1.1542	1.2305	1.029	1.031	1.5542	1.6428	1.1991	0.9961	1.395	1.3373	1.088	1.7371	1.5556	1.1289	1.5792	1.2938
37.3	1.1272	2.5959	1.7261	2.7434	1.6058	1.6043	2.0217	1.2923	1.2071	1.8507	1.3094	1.2766	1.409	1.1177	0.9172	1.5269	1.9199	1.0157	0.9725	1.2156	1.1859	1.1878	1.726	1.4125	1.0086	1.7645	1.3692
37.4	0.9374	2.2288	1.7225	2.7976	1.5442	1.4735	1.6537	1.2419	1.1842	1.9444	1.4637	1.2582	1.3116	1.093	0.8828	1.5544	1.7931	1.1807	0.8714	1.3665	1.487	1.1535	1.7126	1.4321	1.0363	1.9473	1.3602
37.5	1.0953	2.3801	1.7464	3.1211	1.7868	1.6114	1.4715	1.3406	1.2444	1.8439	1.5361	1.2004	1.285	1.1633	0.8387	1.5308	1.9543	1.0732	1.001	1.4045	1.3345	1.1475	1.6267	1.4712	1.2718	1.6517	1.409
37.6	1.1732	2.271	1.6384	2.8505	1.677	1.5866	1.5307	1.3935	0.999	2.0052	1.3763	1.2138	1.3438	1.0473	0.8234	1.542	1.8282	1.2217	1.1777	1.3986	1.4192	1.2053	1.5078	1.4254	1.3765	1.6898	1.2265
37.7	1.1888	2.0634	1.3369	2.7699	1.4767	1.8189	1.5839	1.3713	1.4069	1.9817	1.2828	1.3233	1.3676	1.1267	0.9037	1.6455	1.8152	1.4044	0.9512	1.358	1.271	1.3542	1.6068	1.5546	1.501	1.7448	1.266
37.8	1.0307	2.3767	1.8119	2.8404	1.5586	1.8206	1.474	1.2765	1.1504	1.9717	1.4641	1.2851	1.3563	0.9986	0.8898	1.5322	1.7197	1.1876	0.9374	1.5146	1.217	1.2537	1.5297	1.4296	1.5954	1.4621	1.287
37.9	1.0979	2.1797	1.4428	2.7736	1.3746	1.7642	1.5775	1.431	0.9567	2.0943	1.4226	1.3004	1.6303	1.1013	0.9928	1.6797	1.7071	1.1725	1.1117	1.3871	1.2721	1.2017	1.6915	1.6456	1.5396	1.5183	1.3843
38	1.1663	1.9368	1.5213	2.5796	1.7087	1.6759	1.7343	1.3481	1.3581	1.8626	1.3906	1.0378	1.6611	1.2854	0.8954	1.5047	1.6214	1.1104	0.9661	1.6017	1.014	1.2514	1.6547	1.5532	1.5364	1.347	1.2169
38.1	1.1885	2.0025	1.664	2.7464	1.5135	1.66	1.8527	1.2939	1.3666	1.8296	1.4837	1.0956	1.5733	1.3055	0.929	1.6905	1.5707	1.2135	1.1106	1.3217	1.1941	1.0862	1.5613	1.8183	1.2489	1.467	1.2868
38.2	1.154	2.1298	1.4194	2.6807	1.3952	1.8285	1.8258	1.2829	1.4796	1.7896	1.5126	0.9953	1.2675	1.476	0.8143	1.4877	1.639	1.2094	1.0517	1.4041	1.0741	1.1459	1.8547	1.5788	1.5213	1.425	1.1659
38.3	1.0313	1.9512	1.3951	2.6642	1.4571	1.3217	1.7731	1.4493	1.2969	2.0509	1.4181	1.0142	1.4563	1.0775	0.8565	1.6133	1.5406	1.3066	1.097	1.4643	1.1856	0.979	1.6542	1.4829	1.481	1.3088	1.4127
38.4	1.12	1.847	1.6637	2.7642	1.4059	1.3387	1.7521	1.3181	1.2796	1.9166	1.5892	1.2272	1.6041	1.2377	0.9965	1.5775	1.2215	1.2047	1.0185	1.3135	1.2934	1.0672	1.4623	1.502	1.4134	1.4434	1.2885
38.5	1.1956	1.7117	1.4737	2.8244	1.411	1.4042	1.5836	1.3319	1.1865	1.9353	1.5816	1.2663	1.4937	1.1465	0.8829	1.6466	1.2952	1.4143	1.1251	1.339	1.1544	1.2604	1.652	1.5511	1.2675	1.3442	1.2935
38.6	1.1955	1.9998	1.2796	2.5707	1.4904	1.3004	1.7105	1.238	1.0746	2.0888	1.5245	1.0653	1.5165	1.1777	0.9967	1.6682	1.2276	1.2958	1.1405	1.632	1.0652	1.0343	1.6594	1.396	1.3204	1.5007	1.2774
38.7	1.3008	2.0886	1.5318	2.88	1.4318	1.3592	1.5897	1.2953	1.4201	1.9424	1.4666	1.1187	1.2474	1.0524	0.9918	1.5265	1.383	1.3618	1.1025	1.4326	1.2727	1.0946	2.0224	1.3296	1.3925	1.4368	1.3788
38.8	1.1934	1.8246	1.3255	2.8308	1.4494	1.3693	1.5535	1.4101	1.6057	1.9368	1.3368	1.0372	1.3475	1.1993	0.9875	1.5256	1.3061	1.2592	1.0287	1.2745	1.6716	1.3536	1.8837	1.4486	1.5095	1.4516	1.2126
38.9	1.118	2.0566	1.2841	2.7098	1.5052	1.3953	1.5635	1.2397	1.4309	1.8896	1.4979	1.0465	1.2112	1.0983	0.9905	1.4045	1.2412	1.3703	0.9658	1.1887	1.892	1.1582	1.7273	1.7212	1.4793	1.5999	1.3501
39	1.2725	2.4325	1.3667	2.5374	1.5664	1.4629	1.3704	1.3359	1.6961	2.0687	1.2939	1.0529	1.3441	1.0164	1.1992	1.6267	1.2932	1.3345	1.1529	1.2494	1.5069	1.1336	1.8422	1.4683	1.4476	1.5959	1.2891
39.1	1.2793	2.5854	1.444	2.7366	1.6602	1.5559	1.5273	1.3116	1.2915	1.8592	1.5631	1.2301	1.2279	1.0268	0.8874	1.3383	1.1655	1.212	1.179	1.2739	1.3175	1.1257	2.0762	1.5898	1.4977	1.444	1.2132
39.2	1.1604	2.288	1.3339	2.7424	1.5911	1.81	1.5191	1.5246	1.1671	1.8515	1.4227	1.1363	1.1677	1.0189	1.0494	1.5487	1.4591	1.2868	0.9985	1.2352	1.4481	1.216	1.9474	1.4348	1.3444	1.4418	1.16
39.3	1.1604	2.2303	1.4455	2.6962	1.4416	1.6	1.5598	1.6055	1.3628	1.7877	1.57	1.0688	1.1483	1.1537	1.0441	1.5598	1.2691	1.2082	0.9342	1.4704	1.2918	1.2443	2.0567	1.4792	1.4222	1.5141	1.2164
39.4	1.2084	1.7612	1.3983	2.5734	1.4369	1.4927	1.7609	1.5389	1.1112	1.8099	1.3812	1.0709	1.1251	1.2173	0.8262	1.409	1.4965	1.1624	0.9452	1.7202	1.6203	1.0394	1.7313	1.4289	1.4596	1.5093	1.1274
39.5	1.1237	2.0676	1.4771	2.6791	1.436	1.6626	1.7029	1.5354	1.2542	1.824	1.6435	1.1308	1.0922	1.2787	0.928	1.4359	1.1922	1.3812	1.0532	1.5303	1.5672	1.2015	1.5271	1.5226	1.5328	1.525	1.3869
39.6	1.1865	1.8609	1.2926	2.8068	1.5352	1.4331	1.6917	1.6719	1.5065	1.8075	1.3985	1.0707	1.1986	1.2215	0.8819	1.5594	1.4047	1.3243	1.0642	1.2596	1.8147	1.1092	1.5664	1.4813	1.1935	1.3427	1.2067
39.7	1.2466	2.042	1.5481	2.541	1.4678	1.5302	2.0199	1.4803	1.128	1.7599	1.5019	1.065	1.024	1.1817	1.0079	1.1799	1.4335	1.2671	1.1939	1.2218	1.5998	1.367	1.7757	1.4843	1.1453	1.4324	1.2295
39.8	1.3628	2.2105	1.4968	2.5103	1.5449	1.5507	1.658	1.2685	1.165	2.0155	1.5105	1.2324	1.0498	1.3048	1.0234	1.2831	1.2547	1.2285	0.9136	1.2488	1.5487	1.119	1.6848	1.5172	1.2582	1.665	1.2315
39.9	1.24	2.1184	1.4091	2.7935	1.3684	1.41	1.6992	1.4434	1.2269	1.9074	1.5588	1.246	1.1626	1.322	1.0626	1.6826	1.0527	1.2087	1.0378	1.2262	1.8056	1.0631	1.7651	1.3712	1.432	1.7421	1.2935
40	1.2974	2.3645	1.6334	2.7105	1.4248	1.5213	1.7873	1.1989	1.3441	1.8756	1.564	1.1915	1.1392	1.3064	0.9497	1.5544	1.4173	1.3171	0.8978	1.2757	1.7192	1.1065	1.7525	1.2727	1.3431	1.5717	0.9912
40.1	1.5685	2.0085	1.435	2.5631	1.4838	1.4975	1.6393	1.1063	1.3874	2.007	1.7203	1.4068	1.0775	1.1834	0.783	1.733	1.4941	1.1316	0.9758	1.3264	1.8592	1.3224	2.0572	1.2859	1.1611	1.6207	1.1093
40.2	1.5441	2.118	1.4927	2.6517	1.5038	1.4996	1.7623	1.5667	1.3584	1.9174	1.5803	1.1883	1.1819	1.2899	0.7771	1.5051	1.4044	1.1559	1.1694	1.2783	1.4648	0.9928	2.2014	1.3831	1.1367	1.6532	1.1901
40.3	1.4865	2.2807	1.3644	2.7276	1.6636	1.4734	1.7155	1.3856	1.4558	2.0488	1.603	1.1769	1.1309	1.0569	0.8757	1.4724	1.3725	1.0708	1.004	1.3505	1.5949	1.1798	1.6891	1.2814	1.1602	1.4774	1.2054
40.4	1.2905	2.1062	1.4349	2.9159	1.392	1.5569	1.8761	1.6081	1.4104	2.0089	1.4073	1.2102	0.9687	1.4287	0.8788	1.3992	1.2983	1.4332	1.1329	1.3756	1.8081	1.1185	1.7581	1.1967	1.2702	1.5898	1.255
40.5	1.3257	2.2534	1.532	2.6113	1.4426	1.4257	1.7652	1.4411	1.1023	1.9195	1.2577	1.1051	1.2276	1.2703	0.8107	1.4033	1.4016	1.0802	0.9506	1.3504	1.6415	1.229	1.9403	1.2311	1.3168	1.7831	1.3102
40.6	1.4324	2.2871	1.6642	2.5182	1.6022	1.3372	1.744	1.5741	1.0718	1.921	1.6138	1.1846	1.0397	1.2716	0.8049	1.3951	1.3229	1.3632	0.934	1.3711	1.6894	0.892	1.8768	1.5993	1.1347	1.7613	1.1378
40.7	1.6502	2.1422	1.5816	2.7574	1.4642	1.3664	1.5882	1.3607	1.3075	1.936	1.5456	1.1143	1.1666	1.3461	0.9371	1.5712	1.4238	1.1032	0.9643	1.2384	1.5763	0.8651	1.7763	1.5749	1.2287	1.9303	1.2181
40.8	1.6809	2.2186	1.3223	2.7445	1.4502	1.5944	1.59	1.5726	1.4138	1.8626	1.222	0.9657	1.1023	1.3237	0.9008	1.3464	1.3912	1.263	0.8192	1.2266	1.7775	1.0974	1.8539	1.4548	1.2067	1.8346	1.2921
40.9	1.5678	2.1763	1.4434	2.6956	1.6154	1.7069	1.5398	1.4399	1.4748	1.909	1.421	1.0897	1.0282	1.4396	0.8437	1.2957	1.1336	1.2187	0.8448	1.3571	1.5573	1.0796	1.7914	1.5304	1.36	1.7547	1.2071
41	1.6167	1.7478	1.6648	2.7825	1.6947	1.5293	1.7867	1.4427	1.2419	1.7283	1.3604	1.2467	1.1662	1.4125	0.7733	1.5016	1.3398	1.1872	1.0815	1.2989	1.4212	0.9228	1.7973	1.6943	1.2127	1.5193	1.2867
41.1	1.7311	2.0977	1.8438	2.6057	1.4804	1.4368	1.6536	1.5418	1.1186	1.7348	1.3359	1.0397	1.105	1.4137	0.8032	1.6442	1.5293	1.2741	0.9116	1.4634	1.363	0.9778	1.6732	1.5642	1.3766	1.6807	1.3754
41.2	1.5245	1.9064	1.7047	2.8083	1.5086	1.4044	1.7988	1.2908	1.2442	1.9309	1.5214	1.2639	1.2393	1.4501	0.8689	1.567	1.2919	1.1748	1.2617	1.378	1.2619	1.0494	1.9013	1.3349	1.3809	1.8157	1.4966
41.3	1.4284	2.1742	1.6184	2.6584	1.5638	1.5799	1.5109	1.4773	1.2421	1.915	1.3041	1.3373	1.1395	1.2865	0.885	1.5789	1.3945	1.2322	0.9944	1.2658	1.6476	1.0166	1.604	1.6905	1.2279	1.6759	1.2832
41.4	1.4563	2.334	1.8821	2.8494	1.6125	1.4339	1.577	1.4187	1.4446	2.0203	1.397	1.1157	1.2053	1.0381	0.7892	1.748	1.2363	1.4609	1.1367	1.3116	1.6627	1.0794	1.7008	1.6146	1.2437	1.6026	1.3836
41.5	1.5465	1.7156	1.566	2.6359	1.6338	1.2897	1.5951	1.254	1.1754	1.7995	1.4493	1.2218	1.1325	1.2347	0.9732	1.7126	1.3595	1.3526	1.0932	1.4387	1.6166	1.2096	1.7199	1.6655	1.2349	1.5089	1.3673
41.6	1.5029	1.897	1.3462	2.5679	1.4708	1.5633	1.625	1.3984	1.3055	1.9438	1.3993	1.1623	1.1272	1.211	0.7943	1.5375	1.4528	1.4477	1.0781	1.1709	1.4941	1.0982	1.7364	1.8397	1.2569	1.8462	1.3155
41.7	1.5182	1.9186	1.4564	2.5959	1.4504	1.6658	1.6734	1.5807	1.3089	1.7127	1.4068	1.3098	1.1005	1.1931	0.7565	1.6231	1.6424	1.2062	1.2	1.2204	1.373	1.0348	1.801	1.4721	1.1866	1.6101	1.39
41.8	1.2321	2.0063	1.3642	2.6861	1.5242	1.5432	1.5695	1.469	1.2802	2.0651	1.5	1.3124	1.0454	1.4889	0.9364	1.5205	1.6784	1.3997	1.2734	1.2526	1.5094	1.0655	1.6696	1.7674	1.0539	1.4657	1.3331
41.9	1.5596	1.9611	1.4269	2.646	1.6083	1.5789	1.5733	1.5234	1.0807	1.9074	1.4065	1.383	1.1264	1.4273	0.8036	1.6674	1.5519	1.45	1.2418	1.5291	1.3923	1.1419	1.6385	1.5623	1.107	1.647	1.1572
42	1.3786	1.8128	1.1524	2.5165	1.6052	1.821	1.4649	1.457	1.0767	2.0368	1.5126	1.3958	1.098	1.4449	0.8755	1.7875	1.4361	1.4119	1.3532	1.5852	1.4216	1.1901	1.7893	1.7986	1.1805	1.848	1.2833
42.1	1.3758	2.0995	1.1806	2.5502	1.6489	1.7148	1.6414	1.2697	1.0545	1.9558	1.6186	1.4447	1.4349	1.3019	0.8448	1.5875	1.4119	1.3615	1.3657	1.2631	1.4988	1.0533	1.721	1.8988	1.0291	1.6219	1.0963
42.2	1.4648	2.0053	1.3953	2.5634	1.3491	1.56	1.6127	1.6104	1.2662	1.9673	1.5572	1.4971	1.1556	1.2369	1.1046	1.7062	1.2888	1.1731	1.1299	1.4835	1.5368	1.3944	1.8848	1.844	0.9932	1.6213	1.1935
42.3	1.4464	1.8937	1.318	2.4784	1.5635	1.7306	1.7862	1.5866	1.2777	1.8524	1.411	1.241	1.5064	1.2875	0.95	1.5022	1.4299	1.3254	1.1853	1.4418	1.4611	1.1594	1.5598	1.8447	1.1639	1.5241	1.2152
42.4	1.3787	1.9689	1.2064	2.4255	1.4603	1.5544	1.6633	1.4071	1.2639	1.922	1.3755	1.2928	1.616	1.2145	0.9424	1.5844	1.4982	1.34	0.9552	1.3515	1.5327	1.1505	1.4691	2.212	1.268	1.6509	1.2396
42.5	1.3884	1.8405	1.42	2.2382	1.677	1.7793	1.8418	1.788	1.4519	1.8949	1.3743	1.2965	1.4721	1.2351	0.9317	1.7102	1.3562	1.3033	1.224	1.3725	1.4139	1.0039	1.5767	1.7583	1.0289	1.4572	1.3202
42.6	1.366	2.0674	1.3499	2.5578	1.5545	1.4811	1.712	2.0097	1.6261	1.8915	1.5497	1.137	1.5261	1.3547	0.9535	1.7611	1.4677	1.3584	1.0326	1.3799	1.3426	1.3205	1.8238	1.8814	1.2012	1.4735	1.2453
42.7	1.4023	1.8821	1.3482	2.6782	1.5507	1.5067	1.5722	2.0016	1.4476	1.9636	1.6002	1.2906	1.417	1.3438	0.9462	1.7066	1.4345	1.2964	1.0374	1.2698	1.3666	1.0995	1.6037	1.7404	1.2953	1.5123	1.5393
42.8	1.2918	2.1367	1.5779	2.7207	1.2932	1.4313	1.633	1.3184	1.3547	1.9532	1.516	1.151	1.5032	1.4994	1.0107	1.6339	1.5627	1.595	0.8775	1.2368	1.3745	0.9334	1.5679	1.7269	1.2182	1.5334	1.2371
42.9	1.2938	2.1887	1.2088	2.6191	1.5228	1.4379	1.6531	1.2089	1.4932	1.7386	1.6222	1.1542	1.3287	1.3507	0.928	1.6555	1.3114	1.4152	1.0291	1.1966	1.2514	1.0472	1.6743	1.7693	1.3205	1.7104	1.1656
43	1.4577	1.9226	1.2945	2.4366	1.3736	1.613	1.4955	1.4333	1.5308	1.9494	1.4249	1.1604	1.1954	1.3831	0.9651	1.4488	1.4912	1.3987	1.2565	1.4995	1.3104	1.095	1.9467	1.8808	1.3819	1.4555	1.1564
43.1	1.4272	1.7433	1.3575	2.3465	1.4581	1.6264	1.5418	1.3706	1.2467	2.0391	1.5756	1.0428	1.5029	1.1977	1.0568	1.6821	1.6846	1.376	1.2155	1.3016	1.6484	0.9975	1.6645	1.8885	1.0808	1.6682	1.0791
43.2	1.6893	1.8923	1.2415	2.5101	1.5518	1.7302	1.4516	1.3161	1.6335	2.0432	1.5386	1.039	1.5777	1.45	0.844	1.4313	1.6311	1.4433	1.451	1.335	1.4103	0.8787	1.5086	1.7552	1.1226	1.6471	1.2391
43.3	1.7998	1.934	1.2517	2.3453	1.6479	1.6857	1.2889	1.2103	1.5184	1.8181	1.4422	1.1385	1.2191	1.1941	0.9223	1.4032	1.5148	1.2513	1.1712	1.2776	1.4067	1.0499	1.6765	1.766	0.9565	1.5292	1.3726
43.4	1.5602	1.7081	1.3192	2.7135	1.7672	1.8174	1.5828	1.368	1.5389	1.8574	1.4436	1.1563	1.2432	1.2836	0.9691	1.3551	1.4312	1.4269	1.3012	1.4696	1.4763	1.0979	1.4324	1.9064	1.1714	1.7737	1.4076
43.5	1.6549	1.7131	1.545	2.4446	1.561	1.7056	1.7059	1.366	1.5378	2.0713	1.4242	1.0418	1.195	1.2048	0.9464	1.2592	1.1658	1.2548	1.2221	1.156	1.4662	1.0939	1.228	1.7648	0.9248	1.8177	1.494
43.6	1.6285	1.5755	1.3741	2.5159	1.5715	1.7491	1.571	1.3992	1.2845	1.9281	1.5308	1.1191	1.3304	1.4119	0.9419	1.3793	1.3344	1.419	1.3472	1.4868	1.628	0.9755	1.4209	1.6961	1.0075	1.7836	1.351
43.7	1.8364	2.0808	1.3424	2.474	1.4806	1.4848	1.6174	1.3861	1.3761	1.8911	1.5312	1.2957	1.3502	1.378	0.8486	1.4369	1.5677	1.5237	1.3069	1.3395	1.5479	0.98	1.4107	1.8807	1.2693	1.7752	1.181
43.8	1.9608	1.5524	1.4958	2.5005	1.4349	1.4512	1.5654	1.4348	1.7226	2.019	1.4733	1.2366	0.989	1.3998	0.9732	1.454	1.4383	1.5539	1.1855	1.4218	1.6879	0.9628	1.4537	1.7329	1.2291	1.7675	1.4265
43.9	1.8276	1.4892	1.6509	2.4004	1.5345	1.6265	1.448	1.3939	1.5312	1.9787	1.5901	1.2981	1.0572	1.3343	0.7225	1.3884	1.2189	1.6682	1.3017	1.2039	1.2135	1.0613	1.4161	1.8319	1.1455	1.7297	1.2386
44	1.5046	1.6142	1.5574	2.5782	1.4365	1.4846	1.4048	1.4691	1.2823	1.9591	1.5352	1.0967	1.2171	1.3452	1.03	1.5392	1.1561	1.6271	1.093	1.3774	1.3371	1.0196	1.534	1.7575	1.2621	2.0308	1.306
44.1	1.5781	1.497	1.4269	2.4133	1.6611	1.5379	1.6104	1.4252	1.6245	1.9172	1.4496	1.235	1.0041	1.4324	0.8927	1.406	1.2764	1.6821	1.2223	1.2363	1.4367	0.967	1.4904	1.6887	1.2028	1.6084	1.2984
44.2	1.5422	1.454	1.6795	2.6496	1.5278	1.3547	1.6412	1.5989	1.4134	2.121	1.443	1.2738	1.0013	1.4359	0.985	1.4787	1.4292	1.9329	1.2524	1.4228	1.3491	1.1782	1.4054	1.5859	1.3909	1.7186	1.312
44.3	1.5121	1.6732	1.5325	2.4265	1.5231	1.4294	1.6779	1.3954	1.4507	1.9407	1.2683	1.1897	1.0144	1.4476	0.9119	1.4227	1.5705	1.7923	1.1513	1.2322	1.3335	1.0157	1.4244	1.7072	1.404	1.7173	1.4661
44.4	1.4888	1.5943	1.2019	2.4065	1.5434	1.3492	1.8685	1.4002	1.314	1.992	1.3748	1.2277	1.1635	1.1944	1.0606	1.4612	1.5629	1.7962	1.0555	1.3069	1.4094	1.161	1.429	1.6912	1.1955	1.7408	1.313
44.5	1.6415	1.4504	1.4013	2.7605	1.608	1.4326	1.8819	1.3508	1.3082	2.4091	1.3517	1.2997	1.024	1.125	1.0267	1.3516	1.5478	1.9862	1.1198	1.1995	1.4839	0.9788	1.4226	1.7234	1.3514	1.6486	1.5558
44.6	1.5213	1.6737	1.3649	2.5744	1.6569	1.5244	1.6926	1.5305	1.1763	1.9923	1.4737	1.282	1.1444	1.3447	0.991	1.2909	1.3777	1.5934	1.0959	1.1972	1.5416	1.1627	1.4656	1.8157	1.4577	1.712	1.3989
44.7	1.4794	1.8698	1.4981	2.8566	1.5137	1.6194	1.7345	1.3329	1.1357	2.1205	1.4611	1.2969	1.0427	1.1737	1.1077	1.4438	1.4138	1.8518	1.0141	1.2125	1.5996	0.859	1.3191	1.6413	1.1176	1.7915	1.3783
44.8	1.3928	1.8198	1.2661	2.6851	1.6482	1.4602	1.458	1.3926	1.5336	2.1029	1.2753	1.159	1.0488	1.3521	1.0655	1.3706	1.3364	1.8985	0.9613	1.2907	1.6147	0.8242	1.5328	1.8033	1.2002	1.6869	1.2036
44.9	1.5177	1.6935	1.3688	2.3839	1.6525	1.4595	1.4317	1.238	1.3888	1.9429	1.4782	1.1899	1.1244	1.3957	1.0379	1.4636	1.1334	1.9771	1.1155	1.1023	1.5399	1.2763	1.3892	1.8206	1.1949	1.9138	1.2582
45	1.5996	1.6363	1.3705	2.3326	1.5544	1.9045	1.7686	1.3569	1.5027	1.976	1.2714	1.1386	0.9515	1.3758	0.8492	1.4144	1.6516	1.7932	1.0035	1.253	1.4937	1.1057	1.3112	1.805	1.1794	1.8117	1.6765
45.1	1.607	1.6956	1.2697	2.6906	1.6205	1.8649	1.5451	1.5197	1.6446	2.0272	1.4849	1.172	1.0128	1.236	0.9109	1.4565	1.4801	2.1256	1.0633	1.2074	1.3097	0.999	1.5019	1.6565	1.2148	1.8367	1.455
45.2	1.4637	1.6507	1.3189	2.8917	1.6925	1.9597	1.543	1.3222	1.4493	2.1401	1.5117	1.0331	0.9252	1.5579	0.8973	1.6408	1.6025	1.9149	1.0486	1.1845	1.4356	1.0668	1.4246	1.7541	1.0779	1.7899	1.3978
45.3	1.4494	1.717	1.4025	3.0109	1.673	1.7787	1.7579	1.2898	1.3953	2.011	1.4096	1.0853	1.042	1.3496	0.8394	1.4346	1.3789	1.8009	0.8985	1.1199	1.3197	1.1271	1.4008	1.8226	1.1921	1.8119	1.3676
45.4	1.5276	1.6768	1.5274	2.6654	1.5277	1.8671	1.7365	1.5856	1.3566	2.1357	1.2691	1.0974	1.0704	1.1663	1.0006	1.392	1.1813	1.7292	0.9745	1.287	1.4637	1.0163	1.5717	1.8779	1.1109	1.6933	1.2854
45.5	1.5717	1.7605	1.462	2.5668	1.6324	1.9202	1.8521	1.7127	1.5214	2.0143	1.1913	1.1794	1.2216	1.2311	1.043	1.6168	1.2256	1.5285	0.8905	1.3133	1.3606	0.9409	1.4391	1.6865	1.0018	1.8566	1.1962
45.6	1.5752	1.875	1.6116	2.5925	1.7851	1.8893	2.0162	1.4825	1.5032	2.0364	1.1264	1.2029	1.1593	1.4078	1.2203	1.5152	1.0733	1.4393	0.9542	1.2033	1.6802	0.8189	1.3547	1.7729	1.2686	1.59	1.2036
45.7	1.5641	2.0615	1.6741	2.6797	1.5561	1.9293	1.6866	1.2932	1.3165	1.8383	1.2036	1.2188	1.0307	1.3132	1.0217	1.5009	1.0266	1.676	1.0491	1.2427	1.6195	1.029	1.5618	1.7756	1.2246	1.4657	1.2211
45.8	1.4163	1.807	1.653	2.6886	1.6788	1.7234	1.56	1.3457	1.2305	2.2108	1.2766	1.1752	1.2026	1.2427	1.1374	1.6056	1.2572	1.531	1.0645	1.3533	1.8943	0.8475	1.5317	1.775	1.225	1.6071	1.2472
45.9	1.6791	2.2539	1.4318	2.5807	1.6798	2.01	1.8605	1.3509	1.5011	2.0111	1.3681	1.2047	1.2341	1.3297	1.0321	1.5776	1.2639	1.5542	1.1271	1.1718	1.6092	1.1992	1.5704	1.9418	1.3397	1.6261	1.3735
46	1.4548	2.198	1.5305	2.7332	1.6913	1.7172	1.6396	1.4513	1.5513	2.1518	1.1385	1.2174	1.0424	1.3637	1.0935	1.6237	1.1199	1.3184	1.2075	1.3222	1.2272	1.1713	1.4678	1.606	1.2241	1.4384	1.1974
46.1	1.4572	1.9636	1.4352	2.6217	1.718	2.2017	1.8039	1.3556	1.541	1.9405	1.1309	1.1036	1.3105	1.273	0.8323	1.6545	1.296	1.6091	1.7471	1.2151	1.2744	1.0757	1.3158	1.918	1.1778	1.5641	1.3083
46.2	1.4296	1.9148	1.4885	2.9633	1.6156	1.7016	1.7018	1.2079	1.2757	1.9245	1.3044	1.0527	1.2352	1.4924	1.0576	1.7956	1.2015	1.6867	1.4711	1.2781	1.5323	0.9911	1.5245	1.8136	1.164	1.5192	1.3662
46.3	1.368	1.8222	1.39	2.8907	1.5001	1.6677	1.6737	1.3428	1.3355	1.8928	1.4301	1.2164	1.3301	1.3648	0.9532	1.7484	1.2924	1.5955	1.6318	1.0758	1.4924	1.1822	1.5978	1.7254	0.965	1.4343	1.3995
46.4	1.4209	1.7774	1.4067	2.9098	1.7769	1.6353	1.775	1.3403	1.2757	2.1321	1.3992	1.3156	1.2718	1.3869	0.8792	1.6193	1.2948	1.9538	1.4572	1.1392	1.6199	1.2047	1.4925	1.8047	1.0349	1.5941	1.5052
46.5	1.5506	1.9104	1.4869	2.6837	1.6267	1.5945	1.6328	1.4236	1.498	2.068	1.3054	1.2417	1.1829	1.4673	0.9358	1.519	1.2292	1.5778	1.7489	1.2334	1.796	1.1132	1.5745	1.6756	1.0907	1.5899	1.3177
46.6	1.5106	2.249	1.56	2.9068	1.54	1.7527	1.9506	1.3971	1.5073	2.0506	1.4207	1.255	1.379	1.4553	0.9654	1.568	1.4493	1.6125	1.8054	1.1898	1.8584	0.9165	1.4683	1.9114	0.9699	1.7682	1.1572
46.7	1.3928	2.1101	1.4106	2.6145	1.5254	1.6186	1.9596	1.3886	1.3893	1.9519	1.4138	1.1589	1.1971	1.2134	0.8628	1.7386	1.3257	1.6413	1.3864	1.1636	1.6973	1.0985	1.3868	1.9167	1.0035	1.6419	1.2742
46.8	1.4179	1.9019	1.3577	2.8733	1.5992	1.6327	2.0697	1.4127	1.4599	1.9933	1.2539	1.1412	1.3817	1.391	0.9822	1.6748	1.4113	1.8294	1.4175	1.1367	1.6084	1.0998	1.5125	1.9197	1.0191	1.4732	1.4027
46.9	1.3862	1.6278	1.4429	2.9082	1.5726	1.6088	1.7428	1.5286	1.3753	2.131	1.2695	1.2991	1.2049	1.5607	0.9046	2.0575	1.2702	1.5565	1.5013	1.3546	1.6593	1.2405	1.4597	1.7495	1.0889	1.5241	1.3365
47	1.3161	1.623	1.514	2.7364	1.4439	1.6023	1.8383	1.3602	1.4995	2.2153	1.2934	1.3418	1.3171	1.2793	0.9989	1.8019	1.2034	1.7434	1.4092	1.2985	1.6029	1.3437	1.3442	1.7559	1.0953	1.4724	1.3813
47.1	1.4865	1.7824	1.338	2.9129	1.5171	1.857	2.1232	1.2476	1.5115	1.6712	1.309	1.198	1.2797	1.5449	1.0254	1.8796	1.4231	1.3834	1.5194	1.203	1.587	1.1037	1.5003	1.7506	1.1528	1.6106	1.1839
47.2	1.5119	2.1657	1.368	2.4793	1.6564	1.5748	1.7662	1.5281	1.1901	2.107	1.2218	1.3225	1.3347	1.3542	1.1998	1.9112	1.2333	1.5598	1.4935	1.1097	1.7509	1.0406	1.4349	1.8812	1.1566	1.6354	1.227
47.3	1.4742	2.0501	1.4905	2.4602	1.6727	1.6534	1.8065	1.5156	1.3095	1.9613	1.1797	1.2054	1.3537	1.2749	0.9327	1.7075	1.5191	1.7188	1.7279	1.3548	1.6262	1.1675	1.42	1.7812	1.1752	1.6493	1.3748
47.4	1.6394	2.1504	1.3479	2.9378	1.8022	1.622	1.7416	1.3056	1.3531	2.1711	1.2902	1.1443	1.2495	1.3929	0.9162	1.556	1.4542	1.5358	1.2412	1.2253	1.7906	1.1321	1.445	1.917	0.9361	1.5828	1.1643
47.5	1.5464	2.0031	1.592	2.684	1.7128	1.665	1.9489	1.5564	1.4093	2.0534	1.2092	1.0799	1.4683	1.2276	1.2172	1.6903	1.4808	1.6504	1.5596	1.3473	1.9387	1.1406	1.6696	1.8518	1.1286	1.5133	1.165
47.6	1.5219	2.1257	1.5876	2.5268	1.7497	1.523	1.6913	1.236	1.3356	2.2564	1.238	1.2162	1.505	1.3593	1.1085	1.8211	1.3986	1.4908	1.3592	1.4908	2.0905	1.1154	1.5759	1.8446	0.9667	1.7667	1.386
47.7	1.4895	2.0613	1.5715	2.9605	1.4938	1.5742	1.8973	1.4082	1.5393	2.2086	1.373	1.2061	1.4253	1.5681	1.1813	1.7314	1.3394	1.4958	1.694	1.2337	1.5603	1.1886	1.4678	1.8515	0.9641	1.4886	1.2031
47.8	1.4678	1.9053	1.527	2.7089	1.5949	1.8107	2.0417	1.3587	1.3168	2.1521	1.4484	1.2732	1.3679	1.5532	1.1234	1.9204	1.3773	1.1463	1.6351	1.3855	1.4591	0.9903	1.4073	1.785	0.9841	1.5137	1.1755
47.9	1.5809	2.0203	1.5897	2.8831	1.5124	1.7814	1.8446	1.2955	1.201	1.9602	1.475	1.2358	1.3624	1.4717	0.9496	2.0131	1.5061	1.6332	1.6042	1.3227	1.4658	1.1622	1.5553	1.7577	1.0036	1.5649	1.0458
48	1.4029	1.9908	1.8804	2.7276	1.5932	1.6961	1.8636	1.4675	1.2039	2.0261	1.3273	1.1118	1.5495	1.5315	1.0905	1.8701	1.6744	1.4576	1.602	1.4648	1.0716	1.3397	1.6483	1.9398	1.014	1.5844	1.1912
48.1	1.433	1.9886	1.746	2.9036	1.5535	1.6311	1.7904	1.4947	1.4419	2.1717	1.5665	1.1419	1.6113	1.5164	1.0693	2.0378	1.6016	1.8344	1.3899	1.3681	1.3273	1.287	1.4355	1.9672	1.1343	1.5855	1.2896
48.2	1.6887	2.2235	1.5703	2.7201	1.5887	1.6068	1.9813	1.5323	1.274	2.1674	1.4288	1.2094	1.4993	1.4279	1.3286	1.8397	1.404	1.6078	1.3654	1.2338	1.3871	1.1439	1.739	1.9301	1.2098	1.9951	1.135
48.3	1.3628	2.1292	1.5411	2.9213	1.4456	1.4644	1.6298	1.3363	1.2046	2.0803	1.4388	1.2725	1.4584	1.3058	1.3923	1.7548	1.4347	1.6448	1.3941	1.3744	1.2422	1.1721	1.6345	1.6486	0.9523	1.5669	1.2572
48.4	1.3456	1.955	1.7412	2.9414	1.4957	1.6475	1.6899	1.5841	1.6714	2.0094	1.5381	1.2525	1.4207	1.4101	1.5542	1.7629	1.3826	1.4931	1.5892	1.377	1.2483	1.1051	1.7157	1.9124	1.0067	1.6707	1.257
48.5	1.42	2.042	1.5812	2.7484	1.4974	1.6324	1.788	1.5313	1.5089	2.0034	1.397	1.1491	1.4017	1.5121	1.6694	1.7115	1.2942	1.5382	1.4106	1.5084	1.2129	1.1593	1.4955	1.9996	1.1305	1.7904	1.1736
48.6	1.2538	1.8836	1.6296	2.9398	1.5628	1.458	1.8275	1.3864	1.4576	2.1228	1.3918	1.2852	1.4744	1.4863	1.5174	1.674	1.3597	1.5419	1.3389	1.3509	1.383	1.1302	1.6594	1.8723	1.3295	1.5154	1.1655
48.7	1.3277	1.9355	1.4004	2.6379	1.6918	1.489	1.5895	1.2218	1.2807	2.1463	1.1925	1.1066	1.3129	1.4547	1.6598	1.7629	1.431	1.6654	1.3899	1.3408	1.5319	1.1142	1.5305	1.9047	0.9966	1.2103	1.1523
48.8	1.3223	2.0411	1.4188	2.8994	1.5454	1.6911	1.7006	1.4503	1.48	2.0778	1.2015	1.3184	1.5135	1.3254	1.7111	1.8554	1.5173	1.5354	1.5542	1.2408	1.4976	1.2013	1.524	1.8077	1.0939	1.2336	1.1392
48.9	1.5267	2.287	1.4603	2.8643	1.4288	1.7963	1.8114	1.6135	1.4429	1.9884	1.3116	1.2073	1.4383	1.3984	1.6848	1.8143	1.596	1.3088	1.4377	1.4155	1.3873	1.1701	1.4437	2.037	1.048	1.5218	1.306
49	1.4707	2.0278	1.3038	2.9571	1.6621	1.7598	1.5575	1.5803	1.4826	1.8862	1.1043	1.3241	1.0751	1.4155	1.7022	1.7539	1.2536	1.4905	1.5319	1.3712	1.4654	1.1887	1.4261	1.938	1.1112	1.5171	1.2371
49.1	1.4018	1.9704	1.6303	2.7033	1.4765	1.739	1.7597	1.5748	1.53	2.0687	1.3534	1.2911	1.0539	1.4004	1.8299	1.7934	1.378	1.7788	1.3916	1.3517	1.5079	1.1108	1.437	2.1394	1.1996	1.3135	1.1775
49.2	1.3429	2.1958	1.4467	2.853	1.3673	1.8427	1.7492	1.712	1.6702	2.0659	1.243	1.3044	1.0554	1.4215	1.6319	1.7975	1.2032	1.4465	1.3379	1.3949	1.387	1.1487	1.4952	1.9337	0.9928	1.3276	1.1628
49.3	1.3362	2.0102	1.4825	2.714	1.4581	1.6044	1.8173	1.4377	1.4254	1.9988	1.3289	1.3754	1.155	1.3977	1.3779	1.6975	1.4191	1.4463	1.2478	1.3926	1.3735	1.058	1.7707	1.9787	0.9042	1.1769	1.1318
49.4	1.518	1.8192	1.6217	2.8726	1.6717	1.5721	1.7927	1.6704	1.3754	1.9451	1.3009	1.3482	1.1329	1.4256	1.6285	1.8302	1.4657	1.2214	1.3662	1.385	1.275	0.9901	1.7453	1.9884	0.8307	1.4839	1.2042
49.5	1.4126	1.6554	1.8165	2.68	1.6044	1.7639	1.6334	1.3286	1.6721	2.0469	1.5711	1.3296	1.0523	1.5895	2.1524	1.7723	1.6172	1.2788	1.3732	1.3979	1.3667	1.0108	1.5015	1.9322	0.9789	1.3713	1.2189
49.6	1.4339	1.8265	1.6875	2.8833	1.6377	1.5463	1.7873	1.4475	1.8967	2.0917	1.4918	1.4456	1.1916	1.4077	2.1865	1.7475	1.5577	1.602	1.412	1.241	1.2539	1.37	1.5207	2.0506	1.0296	1.5503	1.297
49.7	1.6174	1.8747	1.7913	2.7798	1.7302	1.6727	1.6275	1.3424	1.6569	2.0062	1.457	1.4164	1.1884	1.4532	1.9525	1.6759	1.6717	1.1815	1.5289	1.3105	1.2033	0.9875	1.6046	1.8119	0.8915	1.5737	1.2627
49.8	1.808	2.1223	1.7116	3.0365	1.5221	1.6223	1.9704	1.6146	1.24	1.962	1.5722	1.2626	1.1151	1.5286	2.1	1.8371	1.6208	1.3674	1.447	1.3586	1.2512	1.0301	1.5242	1.6823	0.8855	1.6404	1.2743
49.9	1.7814	1.9733	1.705	2.9864	1.7843	2.1453	1.9264	1.5665	1.4197	1.8909	1.4978	1.3208	1.1646	1.4297	2.0674	1.7598	1.6139	1.5892	1.2884	1.3858	1.0803	1.0238	1.5533	1.6445	1.0346	1.8976	1.2227
50	2.0885	1.9588	1.8448	2.7471	1.6873	1.596	1.7219	1.5689	1.3535	1.8902	1.5363	1.5086	1.1977	1.4736	1.9578	1.9175	1.6352	1.3728	1.2938	1.4092	1.3265	1.1556	1.6052	1.79	0.9762	1.8419	1.08
50.1	1.8652	1.978	1.5902	2.821	1.697	1.371	1.4618	1.348	1.4862	1.7272	1.7159	1.1784	1.5284	1.2896	1.9181	1.6613	1.6174	1.3376	1.4956	1.3765	1.4262	1.0866	1.644	1.8512	1.2498	1.6586	1.1921
50.2	1.7442	2.0888	1.5964	2.7852	1.8154	1.6885	1.5902	1.3372	1.4841	2.0162	1.4615	1.095	1.3698	1.3999	2.0006	1.7685	1.6083	1.583	1.2278	1.3885	1.3382	1.0864	1.5469	1.8334	1.3426	1.6765	1.1947
50.3	1.4893	1.975	1.5452	3.135	1.9323	1.4965	1.6358	1.3744	1.5418	1.8099	1.6023	1.2429	1.326	1.473	2.0402	1.7579	1.5241	1.6521	1.2085	1.2802	1.3886	1.1046	1.3188	1.9961	1.0425	1.7058	1.0704
50.4	1.6616	1.9685	1.9406	2.9029	1.5961	1.5921	1.6686	1.2781	1.5049	1.9119	1.6077	1.1445	1.2336	1.4765	2.0437	1.8052	1.8209	1.6912	1.1644	1.3676	1.8635	1.1238	1.3868	1.804	0.9093	1.4409	1.056
50.5	1.5992	1.9465	1.6166	2.8343	1.6413	1.8516	1.5584	1.5008	1.5569	1.8925	1.3804	1.1549	1.5124	1.399	2.0335	1.6021	1.5407	1.5695	1.3176	1.4335	1.327	1.077	1.5769	1.7924	0.9259	1.6982	1.0869
50.6	1.8866	2.2475	1.5609	2.909	1.8015	1.618	1.7652	1.4983	1.3229	1.9892	1.4145	1.2448	1.4427	1.4006	2.03	1.6397	1.5194	1.455	1.1848	1.3214	1.4927	1.0862	1.7841	1.6698	0.9785	1.7325	1.0259
50.7	1.5634	2.1471	1.5494	2.7232	1.6949	1.6085	1.8122	1.4367	1.6057	1.7868	1.4494	1.2931	1.2169	1.4953	2.0912	1.7066	1.4336	1.5488	1.0146	1.4922	1.3444	1.1258	1.4662	2.0318	0.9724	1.4934	1.1659
50.8	1.7546	2.3692	1.3539	2.4315	1.5142	1.815	1.6307	1.5167	1.6165	1.7602	1.3272	1.1419	1.2899	1.6214	2.0532	1.6192	1.3804	1.5555	0.9535	1.4463	1.3224	1.1581	1.3878	1.8235	1.4968	1.5099	1.1245
50.9	1.5299	1.9003	1.4808	2.8237	1.5211	1.5375	1.9988	1.5243	1.7252	1.8102	1.4229	1.141	1.3703	1.3832	1.8784	1.6271	1.2368	1.5732	1.1687	1.5667	1.5443	0.9615	1.4337	1.9482	1.0168	1.3491	1.1999
51	1.3221	2.3349	1.6073	2.891	1.4823	1.4988	1.9542	1.4473	1.7382	1.99	1.3934	1.1853	1.3481	1.3785	1.9902	1.696	1.3533	1.7621	1.2733	1.5121	1.5699	1.381	1.5212	1.7763	1.0769	1.8019	1.163
51.1	1.5204	2.3446	1.7104	2.199	1.4812	1.4964	1.8554	1.4948	1.6829	1.8391	1.4876	1.1169	1.3182	1.5309	2.0451	1.722	1.3035	1.8135	1.5439	1.4233	1.388	1.3077	1.5895	1.7871	1.175	1.7705	1.1331
51.2	1.6212	1.9621	1.5677	2.2521	1.5272	1.4547	1.8124	1.517	1.4514	1.9662	1.5796	1.1509	1.3133	1.6435	1.9335	1.5899	1.2913	1.534	1.6066	1.5238	1.2689	1.0661	1.6745	1.913	1.1622	1.6575	1.4837
51.3	1.5844	2.1616	1.6758	2.853	1.5289	1.4259	1.6357	1.3973	1.6102	1.749	1.633	1.241	1.2778	1.4463	1.8064	1.5998	1.5925	1.7838	1.5436	1.6018	1.3596	0.861	1.5163	1.8686	1.237	1.6174	1.3098
51.4	1.4316	2.2266	1.4949	2.7632	1.533	1.4952	1.9408	1.4165	1.7308	1.9012	1.3236	1.245	1.296	1.7984	1.9024	1.6594	1.5779	1.8464	1.5243	1.415	1.4857	1.0237	1.492	1.8115	1.3353	1.8505	1.2519
51.5	1.6341	2.5897	1.5348	2.9349	1.514	1.6708	1.7008	1.3852	1.5278	1.8536	1.5229	1.4581	1.3557	1.516	1.856	1.4998	1.3139	1.7694	1.4136	1.536	1.2192	0.9504	1.5231	1.803	0.9875	1.8608	1.4572
51.6	1.5492	2.2965	1.5974	3.3117	1.4997	1.781	1.7829	1.4848	1.7511	1.8766	1.5936	1.3983	1.1924	1.5271	1.9455	1.5121	1.5594	1.7041	1.4939	1.4514	1.2746	0.8783	1.4469	1.9358	1.2455	1.7009	1.1935
51.7	1.6274	2.1614	1.8575	3.2372	1.5985	1.9012	1.7986	1.3223	1.6975	2.0243	1.4029	1.4115	1.2015	1.6322	1.8597	1.6089	1.4292	1.8612	1.4302	1.5616	1.2752	0.9762	1.6204	1.8364	1.0692	1.9872	1.196
51.8	1.62	2.1304	1.5851	3.2751	1.6081	1.8705	1.9313	1.4449	1.5211	1.8904	1.6116	1.5682	1.4947	1.5169	2.0249	1.5234	1.4357	1.7552	1.456	1.5897	1.3853	0.9804	1.4566	1.8664	1.2451	2.1047	1.1502
51.9	1.7364	2.413	1.8046	3.054	1.617	1.6493	1.7983	1.2661	1.4279	1.9641	1.6184	1.2178	1.341	1.5036	1.9527	1.3509	1.486	1.5062	1.3445	1.4528	1.4187	0.9577	1.4005	1.962	1.0154	2.0304	1.2489
52	1.6242	2.314	1.7807	2.7725	1.6126	1.7387	1.7489	1.2584	1.5564	2.0116	1.4466	1.2418	1.2465	1.4947	1.6323	1.5278	1.5516	1.5834	1.2643	1.4614	1.2172	1.1478	1.5807	1.8531	1.1657	2.0867	1.2197
52.1	1.5556	2.2339	1.7827	2.4348	1.5658	1.8505	1.8286	1.2676	1.5456	2.0597	1.4221	1.2365	1.2922	1.4264	1.9571	1.496	1.4804	1.6406	1.298	1.4496	1.2599	0.9866	1.5497	1.7465	1.1286	2.1567	1.3367
52.2	1.4599	2.5937	1.6189	2.2562	1.6674	1.7247	2.1021	1.7242	1.6513	2.108	1.6547	1.148	1.2535	1.3859	1.8348	1.5612	1.8977	2.132	1.2005	1.44	1.3373	0.9226	1.8341	1.7719	1.2359	2.0063	1.3373
52.3	1.4819	2.1944	1.7215	2.416	1.5297	1.7291	1.8642	1.5376	1.6523	1.997	1.8673	1.2174	1.3586	1.4246	1.738	1.446	1.9764	2.0342	1.2878	1.3567	1.3422	0.7792	1.4292	1.774	1.0493	1.9718	1.5013
52.4	1.5156	2.5911	1.9632	2.1674	1.6688	1.633	1.8206	1.4962	1.467	2.2289	1.4661	1.2795	1.2684	1.5061	1.9665	1.499	1.8434	1.8009	1.3571	1.306	1.3079	0.9763	1.5378	1.9924	1.097	2.2614	1.3142
52.5	1.5466	2.3576	1.715	2.2282	1.718	1.7366	1.9108	1.5488	1.91	2.0245	1.3512	1.2715	1.2312	1.5483	1.9486	1.6617	1.7274	1.8887	1.2362	1.4178	1.3022	0.8667	1.588	1.8792	1.1034	1.7807	1.13
52.6	1.3843	2.3369	1.9356	2.2733	1.7607	1.7171	1.9457	1.3704	1.6212	1.9314	1.3793	1.2184	1.1607	1.5134	2.1359	1.4755	1.6269	1.9167	1.1645	1.3707	1.4958	0.9352	1.4007	1.8878	1.0308	2.0929	1.3234
52.7	1.3202	2.0309	1.7407	2.3846	1.869	1.6804	1.7392	1.335	1.4872	2.0229	1.2408	1.2261	1.3013	1.5506	2.1341	1.3246	2.0303	2.1039	1.0745	1.6454	1.5022	1.0235	1.5917	1.9076	1.2568	1.7758	1.2968
52.8	1.3372	1.8969	1.7715	2.4309	1.7356	1.7655	1.8952	1.448	1.6523	1.9701	1.3884	1.2738	1.4117	1.4949	1.9308	1.5795	1.7713	2.2891	1.0832	1.2732	1.5037	1.0557	1.5687	1.8579	1.1114	1.945	1.0886
52.9	1.3337	1.8989	1.7368	2.5203	1.5961	1.7233	1.9042	1.4998	1.746	2.0314	1.2769	1.2114	1.1835	1.513	2.0203	1.5026	1.4825	2.3794	1.0981	1.4068	1.7112	0.9228	1.5849	1.9131	0.9563	1.9804	1.1379
53	1.299	1.9159	1.7406	2.4511	1.7422	1.6608	1.8346	1.2455	1.5968	1.9765	1.2948	1.1126	1.4941	1.1959	2.1597	1.5397	1.3646	2.1665	1.1309	1.4166	1.5347	0.9588	1.6487	1.8728	1.0578	1.618	1.0006
53.1	1.5812	2.315	1.7222	2.7374	1.7019	1.9283	2.0174	1.3957	1.7926	2.145	1.4314	1.1566	1.3507	1.2961	1.8324	1.6824	1.3793	2.3522	1.189	1.383	1.5339	0.8279	1.367	1.929	1.0706	1.8497	1.1461
53.2	1.473	1.9575	1.8712	2.5744	1.5977	1.7909	1.9258	1.3946	1.6748	2.1759	1.3967	1.0221	1.4138	1.1577	2.0907	1.723	1.5755	1.9194	1.1375	1.4323	1.8906	0.9789	1.4253	1.8566	1.1673	1.7756	1.1952
53.3	1.3785	1.8458	1.627	2.4745	1.4732	1.7906	1.8803	1.4369	1.4954	1.9969	1.5229	1.2546	1.3782	1.3455	2.2025	1.5401	1.3594	1.9149	1.0148	1.3883	1.6716	1.0163	1.4946	1.9672	1.364	1.9685	1.2719
53.4	1.42	1.9659	1.9696	2.3679	1.5959	1.6513	1.8508	1.5868	1.6619	2.101	1.4374	1.1578	1.2369	1.2666	1.9044	1.633	1.3522	1.6647	1.3383	1.4012	1.837	0.9055	1.3743	2.0384	1.1549	1.7886	1.2127
53.5	1.4956	1.7202	1.5405	2.6378	1.5056	1.8414	1.9034	1.5475	1.8277	2.055	1.554	1.1877	1.1221	1.2778	2.0157	1.7632	1.5026	1.8407	1.1743	1.369	1.8319	0.7672	1.4853	1.9515	1.2804	1.6198	1.6199
53.6	1.4452	1.7699	1.7507	2.6018	1.6537	1.596	2	1.5507	1.7892	2.1268	1.2608	1.1196	1.2714	1.3995	1.7173	1.6065	1.4729	1.7548	1.0827	1.3334	1.6051	0.9194	1.4879	1.9185	1.0294	1.5127	1.4581
53.7	1.6297	1.8038	1.7385	2.8236	1.6326	1.5794	1.8765	1.3826	1.2902	1.9418	1.2453	1.1271	1.2412	1.2594	1.9009	1.6555	1.5173	1.7903	1.0173	1.294	1.5874	1.1602	1.5708	1.9152	1.2442	1.5091	1.2689
53.8	1.5306	2.0761	1.5472	2.4904	1.6465	1.6982	1.9024	1.2474	1.5657	1.8166	1.4011	1.4159	1.3469	1.2643	2.0919	1.6036	1.4827	1.8912	0.9214	1.3108	1.6928	1.2204	1.3579	1.7056	1.0691	1.6578	1.3306
53.9	1.6577	1.9059	1.6049	3.072	1.6605	1.6727	1.8495	1.227	1.8035	2.0204	1.3924	1.254	1.3616	1.2466	2.055	1.7627	1.5881	1.7217	0.8131	1.2209	1.6828	1.1135	1.3849	1.8804	1.0831	1.4277	1.2597
54	1.5155	1.8063	1.6942	2.9258	1.7497	1.5912	1.966	1.5433	1.5669	2.1464	1.3672	1.0941	1.7057	1.2509	1.9559	1.6689	1.5737	1.8688	0.8247	1.4523	1.6313	1.3345	1.3997	1.9213	1.0208	1.6014	1.2191
54.1	1.315	1.8851	1.9786	2.6804	1.722	1.8512	1.7575	1.5401	1.8427	2.0971	1.1495	1.3034	1.6715	1.1522	1.8617	1.6141	1.7177	1.8074	0.9918	1.5409	1.6702	0.9809	1.4547	1.9512	1.0994	1.5598	1.131
54.2	1.2251	1.9853	1.9577	2.5908	1.7395	1.7158	1.4983	1.6516	1.8557	2.2291	1.3819	1.0538	1.4593	1.1818	1.7909	1.7005	1.6439	1.6589	0.862	1.5562	1.6829	1.3731	1.5242	1.8456	1.1163	1.8269	1.1512
54.3	1.2108	1.8888	1.8587	2.689	1.7698	1.6754	2.069	1.7308	1.923	1.9782	1.2735	1.2089	1.4792	1.2855	2.0789	1.6368	1.8693	1.8596	1.0775	1.3209	1.5962	1.3513	1.4506	1.9793	1.1696	1.8188	1.1763
54.4	1.1521	1.9665	1.7817	2.5521	1.7633	1.9181	1.8461	1.5794	1.6438	2.0355	1.3356	1.0527	1.3593	1.083	1.8614	1.5404	1.6262	1.861	0.9459	1.361	1.7278	1.3886	1.4907	1.9506	1.0508	2.0231	1.3633
54.5	1.2702	1.738	1.6384	2.3721	1.7444	1.5318	1.8341	1.6553	1.6817	1.9145	1.3737	1.2222	1.5055	1.1834	1.9056	1.6017	1.5296	1.8639	0.7988	1.2973	1.7952	1.137	1.3793	1.9273	1.2557	1.9932	1.2933
54.6	1.2531	1.8247	1.847	2.5708	1.6321	1.4692	1.6568	1.4156	1.4598	1.924	1.3342	1.0857	1.397	1.2277	1.9634	1.7321	1.6247	1.8457	0.8365	1.5984	1.8229	1.0905	1.4373	1.7822	1.1704	1.6593	1.3597
54.7	1.2039	1.8985	1.7472	2.7942	1.6944	1.5906	1.7313	1.5917	1.5735	2.0983	1.2831	1.237	1.1537	1.2731	2.0391	1.6316	1.6969	2.0445	0.9945	1.4129	1.7888	1.053	1.5591	1.7477	1.3704	1.8899	1.2772
54.8	1.1643	1.9559	2.002	2.632	1.6357	1.8149	1.9444	1.4564	1.5743	1.9986	1.2584	1.1762	1.2218	1.2473	2.007	1.6652	1.9253	1.9946	0.9831	1.2493	1.8724	0.9746	1.4856	1.7393	1.2905	1.6814	1.1576
54.9	1.2098	1.9004	1.9069	2.5842	1.6906	1.5392	1.842	1.5077	1.5349	2.2768	1.4182	1.0821	1.3675	1.2334	1.736	1.6886	1.6313	1.9379	0.8498	1.4764	1.8017	1.1338	1.4417	1.8537	1.1656	1.5689	1.1313
55	1.2386	2.2094	2.0008	2.1242	1.7031	1.686	1.8895	1.3606	1.6309	2.0579	1.3013	1.1947	1.2125	1.4177	1.7882	1.658	1.6155	1.9089	0.9855	1.3538	1.6914	1.0066	1.5106	1.8559	1.1983	1.8561	1.194
55.1	1.1382	2.0294	1.8472	2.3226	1.7236	1.6416	2.0535	1.6363	1.6078	2.1191	1.4378	1.1959	1.3949	1.3549	1.8836	1.6213	1.2928	1.6046	0.8987	1.5545	1.7954	1.1602	1.5695	1.9936	1.1197	1.8835	1.2871
55.2	1.1336	1.8607	1.8315	2.5618	1.7913	1.5679	1.8471	1.4393	1.7226	2.0724	1.2154	1.1747	1.3836	1.4264	1.7666	1.6574	1.2069	1.9312	0.8968	1.5529	1.8611	1.1408	1.4212	1.9949	1.2726	1.7992	1.3677
55.3	1.1307	2.2022	1.759	2.1703	1.6071	1.6504	1.9014	1.5772	1.8412	2.0597	1.201	1.1991	1.2824	1.0886	2.0136	1.7715	1.7468	1.5663	0.9698	1.2849	1.7756	1.0554	1.5523	1.8698	1.2504	1.4438	1.0986
55.4	1.3518	2.2923	1.7773	2.008	1.7538	1.6996	1.9636	1.5157	1.9047	2.1119	1.4358	1.1439	1.3767	1.2426	1.9037	1.6847	1.7749	1.6483	1.0021	1.5931	1.6433	1.0722	1.5896	1.8306	1.2515	1.7754	1.2801
55.5	1.2877	1.9923	1.7195	2.0825	1.7101	1.6041	1.9009	1.4009	1.6027	2.1326	1.2809	1.1455	1.4359	1.1795	1.8301	1.5756	1.2441	1.6756	0.8778	1.5241	1.8134	1.0293	1.4802	1.6827	1.5228	1.7677	1.4072
55.6	1.2741	2.0934	1.9781	2.4141	1.6402	1.7227	1.9191	1.5668	1.7216	1.9515	1.2401	1.0885	1.4488	1.2904	1.926	1.7873	1.2229	1.9263	0.917	1.6295	1.732	1.1084	1.5111	2.1957	1.0487	1.7699	1.2222
55.7	1.2922	2.0682	1.6381	2.5406	1.5055	1.8643	1.8382	1.4345	1.7178	1.9381	1.1696	1.2772	1.4895	1.315	1.8719	1.6044	1.1322	1.563	0.784	1.5416	1.8409	1.1156	1.704	2.0376	1.2734	1.7423	1.312
55.8	1.506	2.0812	1.7787	2.7291	1.7217	1.56	1.7183	1.6566	1.7471	1.9859	1.1375	1.3025	1.1537	1.205	1.8434	1.805	1.2458	1.7018	0.9794	1.3703	1.8263	1.0848	1.4772	2.0544	1.1031	2.1032	1.2338
55.9	1.603	1.7132	1.8191	2.5439	1.7714	1.7475	1.7749	1.5449	1.7376	2.1885	1.0241	1.1453	1.1844	1.2123	1.5538	1.6252	1.2693	1.8031	0.8266	1.4627	1.9164	1.1497	1.4951	1.8585	1.0403	1.9202	1.2624
56	1.6215	1.7253	1.968	2.6345	1.5322	1.8239	1.9797	1.6548	1.7627	2.1584	1.1598	1.2411	1.2733	1.1428	1.7913	1.5896	1.2674	1.7714	0.9695	1.4584	1.6689	0.9959	1.6128	1.8632	0.981	1.8625	1.2173
56.1	1.7387	1.7844	1.7618	2.6827	1.68	1.6865	1.71	1.804	1.6717	2.0662	1.2346	1.1194	1.2768	1.2539	2.1163	1.6933	1.1024	2.0828	0.9314	1.4248	1.9977	1.1741	1.5282	1.9372	1.1101	2.0819	1.391
56.2	1.566	2.1734	1.8342	2.485	1.5141	1.6015	1.7902	1.7872	1.5767	2.1921	1.0055	1.1558	1.3647	1.171	1.6867	1.5512	1.2714	1.6452	0.8954	1.8367	1.8345	0.848	1.4917	2.0745	1.1475	1.6859	1.1979
56.3	1.5348	2.0717	2.1755	2.9058	1.52	1.7737	1.84	1.5524	1.499	2.0694	1.0429	1.1904	1.1862	1.0979	1.7895	1.6989	1.5729	1.6876	1.033	1.3454	2.0092	1.2508	1.4342	1.9855	1.2084	1.9059	1.1905
56.4	1.4705	1.8833	1.9597	2.7387	1.5385	1.5796	1.8801	1.4729	1.7263	1.9913	1.163	1.1352	1.3011	1.2266	1.782	1.57	1.3621	1.8875	0.8977	1.6264	1.9347	1.0736	1.4263	2.0012	1.3196	1.3552	1.1473
56.5	1.5641	1.5575	1.7946	2.5334	1.5313	1.6082	1.7278	1.7139	1.6248	2.0177	1.1233	1.3003	1.2795	1.4624	1.7243	1.8719	1.5611	1.6553	1.1186	1.5466	1.9301	1.0742	1.4848	1.8488	0.9875	1.4736	1.2167
56.6	1.6893	1.828	1.7169	2.8081	1.7255	1.5409	1.8736	1.8713	1.7334	2.1739	1.0506	1.2868	1.2051	1.1248	1.7244	1.6793	1.5115	1.849	0.9235	1.7767	1.7725	1.3054	1.5759	1.7434	1.0038	1.4594	1.1688
56.7	1.5105	2.0205	2.1025	2.7707	1.5709	1.7448	1.8838	1.7282	1.6014	2.0142	1.181	1.0967	1.3472	1.0201	1.7183	1.6649	1.7443	1.5416	0.8885	1.3725	1.6865	1.1986	1.4224	1.7179	1.1048	1.402	1.2341
56.8	1.6956	1.7388	1.8595	2.6799	1.5922	1.5218	1.8709	1.6019	1.4399	2.0233	1.1813	1.1368	1.4653	0.9398	1.7145	1.6554	1.7844	1.8401	1.1339	1.4923	1.9192	1.3127	1.5441	1.8011	1.3179	1.4224	1.1096
56.9	1.9769	1.699	1.8599	2.3402	1.6084	1.6041	1.929	1.6472	1.6508	2.0163	1.0652	1.1136	1.2915	0.987	1.8246	1.6028	1.6642	1.9148	0.8773	1.5832	1.7819	1.1435	1.4073	1.8528	1.1026	1.1456	1.0522
57	1.7491	1.446	1.8585	2.439	1.5535	1.5223	1.8135	1.8993	1.5854	1.8541	1.247	1.2279	1.2696	1.0551	1.6205	1.6205	1.6337	1.9727	0.8899	1.7789	2.007	1.2259	1.4972	1.9309	1.0702	1.5533	1.2726
57.1	1.4806	1.4602	2.075	2.3425	1.4375	1.6578	1.8769	1.9017	1.6178	1.937	1.1656	1.1794	1.2767	0.9948	1.9125	1.6255	1.845	1.9597	0.9008	1.505	1.7464	1.314	1.4613	1.9532	1.1438	1.4549	1.1479
57.2	1.5418	1.9115	1.9228	2.5624	1.4263	1.5029	2.2216	2.1152	1.6913	2.2476	1.1514	1.276	1.3924	1.1059	1.4847	1.5301	1.5921	1.8385	0.8816	1.4201	1.9034	1.2519	1.5596	1.9877	1.3763	1.327	1.2029
57.3	1.672	1.8281	2.2168	2.6254	1.5588	1.7439	2.1552	1.9638	1.5415	2.0559	1.1756	1.3273	1.4028	1.0163	1.4732	1.4661	1.6625	1.851	0.9756	1.6013	1.9708	1.2205	1.6411	1.6979	1.1065	1.3466	1.1893
57.4	1.7272	1.4867	2.1266	2.6358	1.7009	1.7195	2.0063	1.974	1.589	1.9053	1.266	1.2633	1.3949	1.1532	1.5858	1.4698	1.7853	1.9086	0.9214	1.7356	1.6566	1.2081	1.5923	1.9375	1.1813	1.6614	1.1649
57.5	1.659	1.5979	1.9587	2.5668	1.7193	1.8324	1.8965	1.6478	1.6368	1.8869	1.2683	1.4096	1.2402	1.137	1.4493	1.7239	1.732	1.6773	0.9148	1.5242	1.923	1.3624	1.4742	1.8695	1.1672	1.2495	1.2591
57.6	1.5741	1.7022	2.0045	2.5688	1.863	1.4922	1.7861	1.5419	1.8121	2.0463	1.3058	1.2077	1.4839	1.1758	1.6425	1.6824	1.633	1.6869	0.9873	1.4801	2.1293	1.2237	1.6057	1.8367	1.2592	1.2696	1.2197
57.7	1.6813	1.6172	2.0111	2.82	1.7564	1.7325	1.8116	1.762	1.6479	2.0422	1.3693	1.2061	1.3062	1.1911	1.3932	1.6031	1.5774	2.032	0.8046	1.5267	1.7809	1.3463	1.4523	1.9053	1.1392	1.405	1.0721
57.8	1.6979	1.5963	1.9504	2.5572	1.661	1.7765	1.9558	1.8236	1.9088	1.9985	1.2997	1.2125	1.1685	1.0536	1.2248	1.712	1.8319	1.9684	1.003	1.5522	1.791	1.2295	1.3722	1.7414	1.1182	1.5094	1.1255
57.9	1.6702	1.5487	1.7985	2.4398	2.0313	1.6328	2.1082	1.9085	1.4236	1.8861	1.1823	1.281	1.3779	1.0398	1.2598	1.6088	1.9354	2.065	0.9162	1.5427	1.9332	1.771	1.4887	1.7518	1.2758	1.4515	1.1506
58	1.6085	1.5615	1.6301	2.6311	1.7173	1.4113	1.7595	1.7402	1.6058	1.883	1.2694	1.1171	1.5024	1.0678	1.3295	1.9376	2.1252	1.8728	0.9248	1.6515	1.8289	1.1794	1.4535	2.0153	1.2023	1.3769	1.0883
58.1	1.6473	1.551	1.6571	2.7188	1.7909	1.7559	2.2349	1.5905	1.7747	1.9959	1.2341	1.2265	1.357	1.0159	1.257	1.657	2.0776	1.8678	0.8314	1.5662	1.5253	1.1475	1.5268	1.9546	1.1915	1.4082	1.1726
58.2	1.5203	1.6948	1.8186	2.5974	1.671	1.3662	1.9062	1.8372	1.6923	1.8685	1.2001	1.1941	1.5056	1.165	1.3941	1.6758	1.9037	2.1704	0.9246	1.6178	1.6638	1.3469	1.6122	1.7005	1.288	1.484	1.1516
58.3	1.5296	1.6706	1.7433	2.5779	1.5854	1.5517	1.8632	1.7434	1.8178	1.9244	1.2064	1.1955	1.8296	0.9508	1.5324	1.9225	1.9206	1.9207	0.9889	1.3827	1.6594	1.2529	1.3841	1.7635	1.1589	1.3208	1.4482
58.4	1.6702	1.6848	1.8095	2.3755	1.8745	1.2071	1.5495	1.8168	1.7874	1.8488	1.246	1.0641	1.721	1.1412	1.3625	1.7681	1.9498	2.2608	0.797	1.6068	1.6404	1.2368	1.3831	2.1085	1.278	1.3027	1.2223
58.5	1.7185	1.5446	1.7494	2.5538	1.7266	1.437	1.8261	1.7331	1.5576	1.9259	1.2463	1.3331	1.3817	1.1284	1.3229	1.7306	1.6827	2.1876	0.9364	1.5056	1.9794	1.1258	1.6648	1.6567	1.388	1.5567	1.1555
58.6	1.6506	1.5867	1.6809	2.2791	1.7478	1.6397	1.9978	1.5899	1.6064	1.8802	1.2986	1.35	1.5125	1.1585	1.2325	1.6656	1.945	2.0631	1.0075	1.6393	2.0454	1.262	1.4762	1.6947	1.2667	1.4365	1.1916
58.7	1.5012	1.672	1.7206	2.4175	1.7729	1.4304	1.9552	1.5805	1.5484	2.099	1.3149	1.1455	1.5015	1.1092	1.1196	1.7784	1.8608	2.0659	0.9218	1.5279	1.7488	1.0244	1.4553	1.8137	1.1615	1.6219	1.2053
58.8	1.5597	1.3812	1.6705	2.9101	1.7799	1.6112	1.9373	1.5363	1.5883	2.1759	1.2465	1.2056	1.5612	1.1324	1.1808	1.6577	1.7873	2.4136	0.8855	1.5139	1.8027	1.1894	1.3886	1.8374	1.3074	1.5236	1.2421
58.9	1.6673	1.705	1.8871	2.7912	1.8467	1.765	1.9347	1.7509	1.7436	2.2514	1.2766	1.4395	1.525	1.0317	1.0341	1.6524	1.7682	2.4171	1.0851	1.5876	1.6421	1.4169	1.5596	1.7167	1.3981	1.3712	1.1175
59	1.4704	1.7914	2.0728	2.7542	1.7306	1.4752	1.9328	1.6723	1.5299	2.107	1.2675	1.3948	1.1277	1.1603	1.2665	1.758	1.5431	2.2928	1.0699	1.3768	1.6429	1.2865	1.4448	1.9916	1.369	1.2576	1.1086
59.1	1.4476	1.9602	1.7609	2.9728	1.7627	1.3884	1.8981	1.6569	1.3798	1.9637	1.1955	1.7123	1.1805	1.2481	1.2271	1.5086	1.376	2.443	1.0434	1.757	1.8289	1.3889	1.4608	1.8339	1.1779	1.5763	1.2075
59.2	1.4681	1.6822	1.6694	2.7639	1.8125	1.5225	2.0025	1.5659	1.3047	1.9374	1.3758	1.3534	1.0306	1.14	1.1275	1.7383	1.4811	2.5927	1.094	1.7678	1.6444	1.3064	1.4235	1.7389	1.2257	1.6799	1.5316
59.3	1.51	1.8055	1.8627	2.7873	1.8503	1.9048	1.833	1.6634	1.2653	2.142	1.2566	1.2638	1.5601	1.0085	1.3165	1.654	1.4715	2.2572	1.09	1.7258	1.6576	1.2283	1.4179	1.8876	1.3025	1.7517	1.2433
59.4	1.6333	1.7185	1.688	2.7618	1.6813	2.078	1.9029	1.3874	1.6138	1.8946	1.3609	1.4236	1.3066	1.1059	1.2425	1.6884	1.5363	2.115	1.0919	1.5649	1.9021	1.3283	1.4596	1.7815	1.3324	1.5137	1.31
59.5	1.7843	1.6639	1.6275	2.6672	1.5162	1.5986	1.9371	1.4861	1.3764	1.9506	1.2648	1.3842	1.3138	0.9629	1.6338	1.7182	1.4246	2.4332	1.1479	1.5494	1.6475	1.4316	1.502	1.6954	1.3225	1.6513	1.2083
59.6	1.726	1.6855	1.8532	2.1809	1.5585	1.9599	2.0319	1.5393	1.8392	2.0987	1.3513	1.3143	1.1589	1.0155	1.5939	1.6638	1.3947	2.2145	1.1362	1.7105	1.4067	1.5144	1.6183	1.776	1.3258	1.5683	1.28
59.7	1.5447	1.5875	1.9411	2.2644	1.6838	1.6774	1.9816	1.5113	1.56	2.0113	1.3097	1.2042	1.1698	1.0166	1.4062	1.7067	1.5473	2.2644	1.1693	1.8792	1.619	1.6085	1.4641	1.7204	1.1615	1.592	1.1263
59.8	1.6575	1.7542	1.8511	2.3309	1.6449	1.7059	1.92	1.5055	1.6832	1.9036	1.2461	1.2741	1.3795	1.1132	1.4195	1.9273	1.3149	2.356	1.0524	1.3669	1.8123	1.4708	1.6107	1.7942	1.0899	1.4986	1.2083
59.9	1.5673	1.452	1.9107	2.3334	1.8596	1.6585	1.9027	1.3668	1.7387	1.9737	1.5158	1.2052	1.1696	1.0176	1.465	1.818	1.2781	2.2989	1.0761	1.3665	1.6115	1.408	1.589	1.8036	1.2449	1.5551	1.2358
60	1.6159	1.7069	1.7341	2.029	1.6897	1.6769	1.7921	1.4371	1.6494	1.9122	1.8262	1.1659	1.1629	1.0856	1.5326	1.7563	1.4505	2.3752	0.9322	1.4737	1.5101	1.4266	1.4999	1.7778	1.3357	1.7744	1.078
60.1	1.7272	1.7501	1.6975	1.9974	1.7743	1.7458	1.9985	1.5304	1.6075	2.0617	1.5716	1.1918	1.3616	1.2447	1.7936	1.8396	1.4189	2.1335	1.3116	1.438	1.6895	1.6172	1.528	1.771	1.4386	1.6069	1.2129
60.2	1.7806	1.4844	1.947	2.2263	1.8415	1.6022	1.9373	1.3832	1.5509	1.7832	1.5953	1.1925	1.3678	1.022	1.5656	1.5253	1.7194	2.19	1.1039	1.3897	1.6442	1.2907	1.6843	1.9629	1.2025	1.4732	1.0926
60.3	1.7785	1.7249	1.8597	2.1646	1.6614	1.5192	1.966	1.7678	1.5598	2.0633	1.7243	1.1086	1.3321	1.2305	1.52	1.6856	1.802	2.1802	1.093	1.4927	1.6572	1.3527	1.5478	1.9076	1.2904	1.8535	1.1611
60.4	1.6923	1.8324	1.9898	2.1145	1.6977	1.5648	1.9059	1.4097	1.4604	2.021	1.6049	1.1826	1.6297	1.09	1.6396	1.6867	1.5558	2.0255	1.0967	1.4584	1.334	1.8349	1.5955	1.8629	1.29	1.4845	1.247
60.5	1.6002	1.6238	1.8453	2.3074	1.8542	1.5253	1.7516	1.3063	1.2867	1.9534	1.876	1.1634	1.6608	1.184	1.5278	1.7135	1.701	1.789	1.1836	1.6943	1.6074	1.4505	1.5274	1.8262	1.431	1.5549	1.1672
60.6	1.7325	1.7421	1.8187	2.2539	1.8354	1.7805	1.7313	1.3363	1.4163	1.8654	1.9619	1.2862	1.4547	0.9631	1.7618	1.9542	1.3972	1.6439	1.1284	1.4152	1.6287	1.5637	1.5744	2.0785	1.3336	1.8385	1.1787
60.7	1.5231	1.5773	1.7573	2.2948	1.6072	1.5049	2.022	1.3991	1.5132	1.9286	1.604	1.3001	1.4165	1.011	1.5059	1.8277	1.3029	1.6911	1.2381	1.6111	1.5457	1.3088	1.3932	1.9565	1.3687	1.5095	1.3399
60.8	1.6659	1.5499	1.6839	2.5477	1.6644	1.5724	1.8214	1.3181	1.516	1.8233	1.562	1.3823	1.2966	0.9901	1.6676	1.6275	1.7678	1.9335	1.2592	1.6315	1.5629	1.3936	1.378	2.2689	1.3359	1.5945	1.5476
60.9	1.4537	1.7445	1.7829	2.3555	1.6228	1.4457	2.0112	1.4276	1.4924	1.8803	1.679	1.3047	1.355	1.124	1.6033	1.5479	1.8628	1.9964	1.2191	1.5861	1.6724	1.3416	1.4039	2.1849	1.3559	1.4129	1.3678
61	1.7028	1.5963	1.8417	2.4012	1.4888	1.5087	2.1773	1.651	1.598	2.0562	1.6562	1.1485	1.5782	1.0451	1.55	1.5604	1.6884	1.6865	1.1547	1.6781	1.7183	1.5421	1.4985	2.0853	1.293	1.4407	1.5035
61.1	1.4382	1.4443	1.5231	2.5652	1.4638	1.7222	2.2903	1.6469	1.5596	2.0317	1.6161	1.1591	1.3654	1.4056	1.6372	1.7741	1.1823	1.8251	0.9158	1.5034	1.2995	1.4541	1.4332	2.394	1.3859	1.5141	1.488
61.2	1.4462	1.3703	1.8312	2.5815	1.7296	1.7256	2.0471	1.4292	1.6728	1.9998	1.7093	1.2311	1.5252	1.1612	1.5475	1.7612	1.3579	1.8843	0.9393	1.4277	1.7332	1.7271	1.3788	2.1367	1.3536	1.4851	1.3687
61.3	1.4605	1.5246	1.6821	2.8208	1.6169	1.6686	2.3062	1.7064	1.7443	1.9688	1.6331	1.2984	1.4252	1.1007	1.7486	1.7505	1.5415	1.8242	1.0796	1.6363	1.3872	1.6062	1.5669	2.199	1.2656	1.6105	1.2937
61.4	1.6838	1.4271	1.9012	2.5178	1.4738	1.5569	1.9483	1.7526	1.7255	1.9677	1.9228	1.3833	1.6896	1.3157	1.6207	1.7591	1.3342	2.0763	0.9064	1.4568	1.4172	1.4755	1.4922	2.3832	1.2644	1.3916	1.2653
61.5	1.4755	1.3849	1.6338	2.4182	1.663	1.5918	1.9328	1.8398	1.4558	1.8973	1.5651	1.3073	1.7496	1.105	1.6023	1.978	1.3419	2.2484	0.9843	1.4405	1.5943	1.2473	1.4148	2.1621	1.4991	1.5178	1.271
61.6	1.4662	1.4901	1.6134	2.1957	1.5986	1.5251	1.8144	1.9471	1.5091	1.7506	1.4185	1.2539	1.4382	1.0413	1.7755	2.0072	2.1659	2.0305	1.305	1.6183	1.4189	1.3725	1.4116	2.1349	1.1489	1.483	1.3903
61.7	1.552	1.5184	1.6281	2.2097	1.6575	1.4689	2.0921	1.429	1.5812	1.7889	1.6773	1.3313	1.3758	1.1654	1.9048	1.8435	2.2686	1.9305	1.2353	1.5919	1.5653	1.4358	1.5377	2.1017	1.4081	1.4406	1.3474
61.8	1.7557	1.4198	1.8568	2.3352	1.5292	1.581	2.0678	1.4167	1.6564	1.7848	1.5921	1.3684	1.4178	1.1201	1.7549	1.9741	2.134	1.9703	1.3128	1.5667	1.6518	1.3664	1.4696	2.4696	1.3286	1.252	1.3359
61.9	1.7011	1.3216	1.6231	2.1548	1.4825	1.3932	2.34	1.7259	1.5105	1.9571	1.613	1.2931	1.3348	1.1831	1.6683	1.8473	1.9289	1.9266	1.1996	1.445	1.3479	1.328	1.3572	2.4577	1.2141	1.388	1.4281
62	1.8355	1.4699	1.4004	2.0509	1.4987	1.499	1.9298	1.5946	1.5752	1.9241	1.7728	1.3226	1.2979	1.0921	1.5787	1.6876	1.7629	1.8383	1.1847	1.5564	1.5022	1.3256	1.3627	2.313	1.3338	1.4687	1.1904
62.1	1.5408	1.6465	1.7798	2.1446	1.5401	1.5069	1.8851	1.5596	1.4965	1.9771	1.7788	1.5246	1.4816	1.0991	1.4567	1.8091	1.984	1.6383	1.1687	1.449	1.4926	1.2501	1.5051	2.3754	1.3332	1.2654	1.375
62.2	1.3919	1.5743	1.8282	2.2599	1.4898	1.7108	1.9808	1.6741	1.7466	1.9632	1.8359	1.4069	1.1667	1.1306	1.2909	1.6448	1.9111	1.6911	1.1922	1.5003	1.497	1.2099	1.4771	2.2764	1.3209	1.3363	1.2517
62.3	1.6421	1.8039	1.9136	2.0401	1.5329	1.8022	1.933	1.454	1.3876	1.8734	1.6759	1.2508	1.1677	1.3017	1.5469	1.7973	2.1134	1.6742	1.0235	1.7143	1.382	1.1654	1.3449	2.107	1.1906	1.1906	1.2001
62.4	1.3284	1.6789	1.7448	1.9886	1.4896	1.6384	1.9152	1.5666	1.6078	1.8049	2.1069	1.335	1.2027	1.1571	1.4554	1.9231	1.8319	1.6996	1.0311	1.7206	1.2493	1.4927	1.3684	2.2991	1.2041	1.219	1.3505
62.5	1.5554	1.647	1.7003	2.0992	1.7116	1.6298	2.1169	1.9431	1.3491	1.9896	1.9717	1.2409	1.2526	1.0595	1.2838	2.0502	1.9643	1.6409	1.0921	1.5032	1.2714	1.1862	1.3967	2.09	1.3062	1.2006	1.2765
62.6	1.6095	1.7606	1.6406	2.2727	1.9088	1.6698	2.1518	1.829	1.4985	2.1075	1.6876	1.3705	1.3604	1.2047	1.1968	1.9902	1.4627	1.8078	0.9597	1.5872	1.6376	1.2156	1.4953	2.3974	1.2137	1.7379	1.322
62.7	1.4477	1.6438	1.9807	2.1392	1.6346	1.7628	1.953	1.5095	1.2154	1.9008	1.5602	1.3985	1.2011	1.2699	1.1318	1.9474	1.4704	1.7827	0.9749	1.4375	1.6131	1.2751	1.5594	2.2425	1.2558	1.7843	1.3087
62.8	1.7694	1.5778	2.0914	2.1191	1.637	1.5959	2.0899	1.8557	1.6534	1.8025	1.9081	1.3057	1.3789	1.1443	1.0637	1.981	1.5308	1.8783	1.0024	1.4087	1.5163	1.1107	1.48	2.1891	1.2325	1.6848	1.428
62.9	1.5227	1.491	2.1615	1.9658	1.7569	1.7106	1.963	1.5565	1.6329	1.7944	1.7257	1.5381	1.2717	1.0879	1.1295	1.803	1.4069	2.1191	0.9605	1.4544	1.326	1.2327	1.3846	2.3922	1.2642	1.4679	1.2269
63	1.8008	1.744	1.9901	2.2904	1.7754	1.7305	1.9353	1.6113	1.5146	1.8637	1.5435	1.625	1.357	1.0821	1.1418	1.9398	1.4847	1.9856	1.1711	1.4742	1.3346	1.4724	1.5431	2.3493	1.2075	1.5881	1.2766
63.1	1.7488	1.5182	1.7533	2.3685	1.7131	1.7925	1.6805	1.4881	1.5643	1.9519	1.3138	1.3769	1.3418	1.1763	1.0259	1.6898	1.6562	1.8962	1.0096	1.5055	1.6554	1.3062	1.4131	2.4222	1.326	1.704	1.0014
63.2	1.4644	1.4968	1.54	2.4739	1.7483	1.7165	2.1176	1.8381	1.2573	1.9767	1.3884	1.318	1.4652	1.1337	0.9703	1.9171	1.4344	1.7579	0.9954	1.4487	1.7606	1.2621	1.2542	2.3156	1.3222	1.6908	1.2943
63.3	1.6422	1.4616	1.7528	2.6327	1.7442	1.709	2.1731	1.5589	1.4931	1.9817	1.4645	1.3105	1.3903	1.0667	0.9873	1.8886	1.8579	2.0876	0.9451	1.5701	1.7857	1.3566	1.4133	2.1773	1.3529	1.6963	1.153
63.4	1.6556	1.5103	1.6177	2.7152	1.6791	1.685	1.8057	1.7383	1.5963	1.8642	1.5854	1.4855	1.4687	1.0008	1.0964	1.934	1.9368	1.962	1.0691	1.6007	1.9002	1.2271	1.4449	2.4089	1.1718	1.5294	1.2056
63.5	1.7269	1.5476	1.7061	2.5929	1.6153	1.8229	1.8607	1.8354	1.4837	1.8453	1.4669	1.45	1.2982	1.1608	1.2618	1.9528	2.198	1.8471	1.1044	1.34	1.7029	1.1676	1.3513	2.7267	1.0277	1.791	1.1966
63.6	1.6722	1.6403	1.5509	2.5105	1.8137	1.5824	1.9979	1.8374	1.4015	1.9375	1.6037	1.5064	1.4489	1.2416	0.955	2.0273	2.4634	1.7124	1.0386	1.5268	1.8668	1.2532	1.2702	2.7134	1.1403	1.7089	1.1997
63.7	1.6437	1.6398	1.5302	2.5627	1.5687	1.688	1.9545	1.8439	1.4618	1.7774	1.4704	1.1641	1.2132	1.0411	0.9942	1.8698	2.2893	1.8404	1.1649	1.5551	1.9161	1.5635	1.6004	2.1458	1.2336	1.646	1.1716
63.8	1.7804	1.3692	1.4047	2.7743	1.6429	1.7089	1.9834	1.7058	1.5885	1.9003	1.5005	1.2834	1.5219	1.1937	1.08	2.0525	2.2909	1.9772	1.0587	1.5713	1.7889	1.1775	1.3055	2.3502	1.2418	1.6841	1.145
63.9	1.7954	1.3767	1.5322	2.6817	1.6726	1.7298	1.9755	1.6434	1.5976	1.9826	1.3581	1.3444	1.2533	0.9944	0.9991	2.0302	2.2018	1.9479	0.9781	1.5653	1.8786	1.2638	1.5007	2.3845	1.1566	1.4507	1.0587
64	1.9709	1.5051	1.4577	2.5529	1.6064	1.5864	2.1839	1.968	1.59	1.9871	1.3471	1.4225	1.2722	1.1417	0.9307	2.257	1.8481	1.7979	1.0696	1.4192	1.8879	1.2734	1.43	2.4838	1.3376	1.8337	1.3443
64.1	1.927	1.3683	1.5946	2.5086	1.6943	1.6268	2.0164	1.6728	1.4985	1.8443	1.4084	1.3407	1.4319	1.0682	1.0295	2.0351	1.7541	2.0672	1.0276	1.3952	1.8981	1.5123	1.4541	2.4382	1.3031	1.8602	1.2589
64.2	2.1077	1.5477	1.5634	2.7595	1.5867	1.5564	2.0323	1.871	1.5899	1.836	1.4803	1.3922	1.66	0.9676	1.2122	1.8397	1.6267	2.0425	1.0864	1.3538	1.5358	1.7028	1.4399	2.4418	1.4206	1.5108	1.1961
64.3	1.9349	1.3519	1.7335	2.5906	1.5752	1.6071	2.2103	1.3449	1.386	1.9407	1.5262	1.5699	1.3354	1.1357	1.2822	1.8444	1.5028	2.1484	0.9592	1.3887	1.6395	1.7283	1.5154	2.5044	1.2306	1.2135	1.2761
64.4	2.2025	1.4258	1.6161	2.4767	1.771	1.6627	1.9236	1.345	1.6655	2.0384	1.6386	1.4662	1.5031	1.0844	1.0576	2.0577	1.5758	2.0083	1.1214	1.427	1.554	1.4167	1.6803	2.3172	1.4935	1.5534	1.1646
64.5	1.9202	1.7701	1.6917	2.8621	1.7841	1.6216	1.9783	1.1599	1.4338	2.0326	1.6019	1.3825	1.593	1.0695	1.0085	1.9995	1.7985	1.6613	1.0872	1.4365	1.9332	1.3628	1.5613	2.4473	1.2167	1.3951	1.2786
64.6	1.8628	1.7556	1.7367	2.6627	1.7998	1.5217	2.1736	1.3586	1.3602	1.9392	1.6379	1.3852	1.2928	1.118	1.2125	2.0176	2.0141	1.7107	0.9639	1.7209	1.9199	1.5076	1.5692	2.4456	1.217	1.2848	1.4122
64.7	1.8559	1.3783	1.6553	2.9888	1.6829	1.4898	2.0754	1.3428	1.5276	2.0222	1.5452	1.4697	1.3798	0.9932	1.0545	1.9074	2.1537	1.9729	1.127	1.4086	1.6532	1.4836	1.4629	2.535	1.1738	1.5194	1.2858
64.8	1.7953	1.6172	1.7406	3.2677	1.8593	1.686	2.0799	1.9582	1.3099	1.8236	1.7585	1.4054	1.2517	1.047	0.984	1.8955	2.1485	1.8078	1.1474	1.6217	1.6012	1.1021	1.534	2.3212	1.2345	1.3457	1.1721
64.9	1.7422	1.561	1.8023	2.8155	1.7764	1.6137	1.7831	2.0706	1.3239	1.8427	1.4816	1.6129	1.4525	1.1996	0.9093	1.9593	2.0906	2.0361	1.1847	1.6878	1.6314	1.208	1.4263	2.3269	1.1656	1.3426	1.1735
65	1.6611	1.4132	1.401	2.4758	1.6154	1.5523	1.8018	1.7499	1.37	1.9573	1.6946	1.5421	1.2522	1.0137	0.9213	1.8489	2.0783	1.8423	1.1604	1.6366	1.8041	1.3811	1.4291	2.0952	1.3044	1.1928	1.2402
65.1	1.7487	1.6691	1.3869	2.2925	1.7512	1.7115	1.9852	1.8946	1.5355	1.9313	1.818	1.2878	1.1276	1.108	1.224	2.0555	2.1883	1.8756	1.2912	1.276	1.9746	1.3795	1.4548	2.0854	1.0357	1.4331	1.2922
65.2	1.8646	1.4697	1.4001	2.1098	1.6833	1.5239	1.9201	1.8897	1.4615	1.9418	1.6724	1.3914	1.3102	0.9866	1.0562	1.9176	2.1319	1.9906	1.0816	1.2731	1.7063	1.4397	1.502	2.2866	1.1662	1.7338	1.29
65.3	1.6797	1.553	1.5382	2.2241	1.8894	1.4516	1.7186	1.9257	1.2182	2.0315	1.597	1.5912	1.287	1.2342	1.0486	2.0289	2.2649	1.9573	1.1848	1.2449	1.8606	1.383	1.3376	2.0609	1.1846	1.4782	1.3708
65.4	1.8043	1.3357	1.5267	2.5582	1.6891	1.536	2.04	2.0125	1.5083	2.0496	1.6978	1.7324	1.3004	1.2376	1.1128	1.8714	2.0978	1.7937	1.2862	1.4838	1.9674	1.4615	1.4249	2.0651	1.2416	1.8628	1.2366
65.5	1.6965	1.3015	1.5624	2.5061	1.7093	1.8651	1.8197	2.1514	1.5408	1.9856	1.6412	1.5137	1.1839	1.2533	1.0723	1.8341	2.1231	1.8273	1.0808	1.3604	1.8864	1.3398	1.3615	2.1057	1.1255	1.9144	1.0857
65.6	1.7615	1.3277	1.4249	2.5194	1.7514	1.7311	1.9866	2.1125	1.7193	1.9685	1.6841	1.5489	1.0341	1.1269	1.0215	1.9471	2.2752	1.6023	1.0437	1.4863	1.9166	1.4441	1.3912	2.1008	1.1302	1.654	1.0633
65.7	1.7069	1.7025	1.3901	2.4074	1.7199	1.6457	2.0039	2.1422	1.557	1.8353	1.7713	1.2789	1.0774	0.9946	1.1163	2.1062	2.4167	1.4919	1.0508	1.5777	2.0588	1.4387	1.4556	1.969	1.3084	1.5341	1.3917
65.8	1.6135	1.4094	1.479	2.3871	1.9177	1.7729	1.9248	2.0251	1.5497	2.057	1.9479	1.4276	1.1324	1.135	0.9794	2.0168	2.3113	1.7127	0.8833	1.4532	1.8169	1.3437	1.4254	2.3807	1.0547	1.9606	1.171
65.9	1.8121	1.611	1.5138	2.8066	1.8593	1.808	1.6449	2.3979	1.5591	1.8823	1.9391	1.3236	1.0243	1.1937	1.1562	1.8532	2.4852	1.8514	1.1012	1.4265	1.823	1.4944	1.3864	2.2382	1.2417	1.8187	1.383
66	1.8266	1.6251	1.7257	2.879	1.818	1.6994	2.0803	2.086	1.3822	1.8957	1.9749	1.3577	1.1406	1.076	1.1038	1.8782	2.4944	1.7966	1.0671	1.5919	1.6967	1.4358	1.4336	2.1383	1.0367	1.3416	1.2297
66.1	1.9622	1.824	1.5435	2.6628	1.7358	1.5834	2.089	2.3688	1.5931	1.9012	1.8179	1.3979	1.1128	1.2393	1.0056	1.9024	2.258	1.7347	0.9318	1.5253	1.4465	1.5207	1.4872	2.025	1.1939	1.8563	1.1553
66.2	1.8313	1.4862	1.3996	2.9408	1.7079	1.7283	1.9858	2.4042	1.5439	2.1009	1.7571	1.4639	1.1727	1.1235	0.9892	1.8128	2.3485	1.6677	1.035	1.4642	1.5872	1.4223	1.3388	2.166	1.2017	1.6878	1.2294
66.3	1.741	1.6091	1.6458	2.9508	1.5803	1.8049	2.0823	2.4214	1.587	2.0446	1.5538	1.2637	1.3422	1.0538	0.9511	2.034	2.2247	1.9075	1.0637	1.5494	1.6993	1.3156	1.474	2.1435	1.3076	1.4696	1.1772
66.4	1.9361	1.6088	1.6526	2.7902	1.7179	1.842	1.9487	2.351	1.5998	1.9424	1.8276	1.2764	1.1763	0.9483	1.1194	1.8872	2.5601	1.5712	1.0514	1.7612	1.7109	1.4287	1.4146	1.9392	1.2968	1.5049	1.0608
66.5	1.8372	1.7502	1.7888	2.9705	1.806	1.5281	2.1523	2.2776	1.5287	1.7722	1.6954	1.2962	1.3081	1.0664	1.0356	1.8027	2.429	1.438	1.0847	1.7121	1.4087	1.3406	1.4202	1.9721	1.1327	1.3146	1.182
66.6	1.765	1.7221	1.4143	2.6731	1.7695	1.8201	2.2434	1.6856	1.5801	1.8867	1.6648	1.1909	1.1425	1.0623	0.8263	1.6466	2.1914	1.5414	0.9333	1.6769	1.742	1.4063	1.3517	2.4015	1.4804	1.6634	1.2189
66.7	1.5515	2.0278	1.6608	3.0338	1.7778	1.6601	2.0019	1.7063	1.7185	2.0774	1.8142	1.2986	1.1963	1.0497	0.9083	1.8628	2.4405	1.5387	0.9907	1.2773	2.0005	1.571	1.3888	2.2867	1.2735	1.8544	1.1748
66.8	1.7752	1.8028	1.4308	3.0638	1.7888	1.7261	1.9635	1.5319	1.6483	1.9112	1.9613	1.2657	1.2833	1.0644	0.9316	1.7121	2.3999	1.5046	1.3451	1.3904	2.1167	1.4002	1.574	2.1355	1.4921	1.3871	1.2215
66.9	1.6777	2.0459	1.6408	2.6491	1.8093	1.4963	2.0644	1.8457	1.6416	2.0406	1.752	1.3566	1.312	0.9393	1.0474	1.9487	2.3652	1.6166	1.0234	1.6075	1.625	1.3494	1.6231	2.2314	1.3061	1.5336	1.1698
67	1.6417	2.0781	1.5729	2.6838	1.8167	1.9822	2.0218	1.9723	1.8694	2.0211	1.7745	1.4394	1.3253	1.152	1.0336	1.6554	2.0659	1.6431	1.0009	1.5102	1.6567	1.3548	1.4194	2.2951	1.5728	1.5389	0.944
67.1	1.7757	2.1459	1.5984	2.843	1.7605	1.4846	2.1676	1.8332	1.7061	1.9344	1.7007	1.2579	1.2034	1.2453	1.0357	2.1512	1.8099	1.6412	0.9449	1.5104	1.5888	1.2234	1.383	2.1936	1.2417	1.6301	1.0973
67.2	1.795	1.929	1.459	2.7183	1.786	1.8528	1.8227	1.6854	1.5528	1.9084	1.8596	1.3238	1.431	1.1276	0.8606	1.7884	1.9184	1.564	0.9982	1.6394	1.6155	1.3575	1.5283	2.1217	1.2713	1.5566	1.0895
67.3	1.8008	1.9239	1.4647	2.5594	1.6332	1.722	2.2622	1.5496	1.6551	1.9916	1.7145	1.3517	1.2942	1.0041	0.8466	1.9239	2.1101	1.5756	0.9802	1.4696	1.672	1.3862	1.436	2.0927	1.4522	1.6496	1.4919
67.4	1.584	1.9315	1.5583	2.4795	1.7942	1.7736	2.0189	1.4182	1.4989	1.8205	1.5248	1.3247	1.5534	1.2342	0.9832	1.6055	1.915	1.8777	1.0417	1.7034	1.7959	1.2071	1.4198	2.0526	1.4079	1.4576	1.4058
67.5	1.4763	2.144	1.7266	2.5475	1.8488	1.7593	2.1809	1.7361	1.4119	2.1771	1.7665	1.2696	1.5589	1.134	0.9588	1.7203	2.3901	1.7122	1.0296	1.5424	1.6453	1.2669	1.3515	2.0481	1.2754	1.4781	1.1566
67.6	1.5776	2.0583	1.6273	2.3618	1.8355	1.5806	2.1617	1.581	1.5436	2.0661	1.7414	1.3569	1.3879	1.2944	1.0173	1.7432	2.4972	1.6826	1.0457	1.4216	1.7154	1.2962	1.4679	2.1652	1.3025	1.3687	1.2661
67.7	1.4292	1.9602	1.476	2.4311	1.991	1.8777	2.116	1.8671	1.5351	1.9737	1.5569	1.3421	1.6155	1.3513	1.0601	1.7896	2.6529	1.5725	0.888	1.404	1.4994	1.5008	1.4132	2.2185	1.1653	1.5759	1.2445
67.8	1.5034	1.8094	1.7787	2.5028	1.8911	1.6372	1.6516	1.7803	1.18	1.7851	1.711	1.3673	1.3188	1.1971	0.9668	1.7647	2.3503	1.5532	0.9835	1.377	1.6532	1.5077	1.3499	2.282	1.1454	1.3173	1.1961
67.9	1.4721	1.9916	1.8202	2.5321	2.1157	1.8137	1.7702	1.6121	1.4699	1.8205	1.7111	1.3529	1.4163	1.1919	1.0357	1.8422	2.6226	1.4921	0.8533	1.3277	1.7536	1.5025	1.5111	2.2452	1.0745	1.2576	1.1752
68	1.6305	1.7451	1.795	2.5147	2.0611	1.7689	1.822	1.8314	1.4012	1.7812	1.8257	1.3129	1.4373	1.2226	1.12	1.6899	3.1729	1.6507	0.9813	1.4394	1.9996	1.6108	1.3842	2.2384	1.2561	1.2553	1.2169
68.1	1.5422	2.0606	1.6807	2.3636	1.9011	1.7177	2.0955	1.6014	1.5509	2.0027	1.8078	1.3732	1.448	1.2952	1.1202	1.6775	3.2776	1.7585	0.986	1.5333	1.5756	1.4839	1.2896	2.2761	1.2057	1.2768	1.2554
68.2	1.5908	1.8871	1.6843	2.3273	1.971	1.8437	2.0455	1.8603	1.2019	1.8812	1.9	1.3407	1.2276	1.0747	1.2742	1.7232	3.1832	1.9502	1.0501	1.4238	1.5444	1.5218	1.4537	2.1013	1.2472	1.1343	1.2697
68.3	1.5656	1.7733	1.7581	2.2778	1.9278	1.5489	1.8359	2.0804	1.5126	2.0262	1.6976	1.3625	1.2787	1.1912	1.2698	1.8273	3.0467	1.7463	0.8601	1.4257	1.6952	1.493	1.3957	2.1722	1.17	1.3026	1.1337
68.4	1.674	1.5255	1.7444	2.1106	1.8615	1.5924	2.0351	1.8578	1.5437	1.8113	1.8961	1.3838	1.1263	1.0825	0.9695	1.6865	3.1231	1.6972	0.9496	1.2961	1.6271	1.6353	1.4575	2.2834	1.2646	1.1674	1.0101
68.5	1.4997	1.5476	1.8778	2.096	1.7133	1.5668	1.7467	1.8986	1.809	1.9327	1.9075	1.1797	1.2555	1.0772	1.0399	1.8288	2.9753	1.9034	1.0308	1.5278	1.8207	1.8246	1.3709	2.3554	1.2388	1.2032	1.0811
68.6	1.4237	1.7374	1.7644	2.2347	1.8149	1.7419	1.8591	1.7718	1.5795	1.9688	1.8202	1.1769	1.293	1.0426	1.0263	1.7725	2.7962	1.9065	1.0362	1.4827	1.9073	1.7199	1.4022	2.4291	1.3679	1.5573	1.3591
68.7	1.6612	1.7948	1.5986	2.2598	1.7333	1.6048	2.0309	1.8172	1.3861	1.7592	1.6986	1.3198	1.3607	1.3291	0.9968	1.7476	2.8837	1.9235	0.9371	1.6065	1.7737	1.6324	1.4231	2.3433	1.4316	1.5987	1.0926
68.8	1.5193	1.6445	1.6828	2.2128	1.8761	1.7867	1.998	1.9489	1.7343	1.8968	1.5904	1.198	1.1749	1.0734	1.0129	1.9167	2.5553	2.0197	0.9493	1.4788	1.6153	1.71	1.3503	2.4117	1.4125	1.5187	1.1731
68.9	1.7094	1.6827	1.5023	2.2441	1.8111	1.7002	2.1556	2.0197	1.5138	2.0139	1.4933	1.2707	1.1935	1.0541	1.1822	1.8676	2.7563	1.7392	1.211	1.5425	1.358	1.5004	1.4193	2.4534	1.3677	1.2641	1.236
69	1.5763	1.5219	1.7003	2.2097	1.7114	1.9322	1.9819	1.5549	1.7888	2.0223	1.6146	1.3466	1.4491	1.3521	1.3574	1.9421	2.9473	1.935	1.1381	1.5747	1.5575	1.672	1.4961	2.5132	1.3832	1.5418	1.2441
69.1	1.6003	1.7997	1.5548	2.187	1.8304	1.7479	1.9581	1.6167	1.6347	2.0695	1.6496	1.4088	1.607	1.0653	1.0002	1.9579	2.6564	1.6135	1.0808	1.61	1.6009	1.4735	1.4389	2.3354	1.2662	1.4105	1.3964
69.2	1.4897	1.8497	1.7339	2.3226	1.7312	1.9145	2.1433	1.4999	1.8809	1.9274	1.5616	1.3225	1.5653	1.1927	0.9751	1.9181	2.7361	1.8052	1.123	1.7646	1.3535	1.683	1.4698	2.4539	1.4471	1.3369	1.3052
69.3	1.5588	1.7566	1.62	2.3766	1.8359	1.731	2.1802	1.6501	1.6148	1.9046	1.6622	1.2401	1.5503	1.2359	1.1683	1.8839	2.5701	1.7654	1.1888	1.3426	1.7342	1.646	1.2945	2.662	1.3429	1.7	1.2386
69.4	1.6051	1.7387	1.6358	2.2213	1.9201	2.0106	1.9516	1.584	1.6761	2.1211	1.5094	1.1251	1.6418	1.0595	1.0603	1.99	2.415	1.7745	1.324	1.4043	1.5359	1.6248	1.4875	2.2357	1.5287	1.6837	1.2647
69.5	1.5994	2.0394	1.5842	2.2537	1.8588	1.8802	1.9498	1.2352	1.7261	1.9002	1.4701	1.3467	1.4525	0.9859	1.0861	1.9088	2.5265	1.6559	1.1226	1.8049	1.8208	1.547	1.3663	2.436	1.2459	1.5539	1.0805
69.6	1.4594	1.9229	1.5851	2.2224	1.8167	1.5945	1.9707	1.6163	1.6967	2.0485	1.5453	1.3077	1.2026	1.0991	1.3208	1.9577	2.6262	1.8745	1.3281	1.3341	1.6064	1.5213	1.2418	2.4166	1.2513	1.5401	1.2147
69.7	1.3103	1.7992	1.5905	2.3367	1.8286	1.728	1.8028	1.6229	1.826	2.0191	1.4459	1.3905	1.4564	1.0672	1.1468	2.05	2.4955	1.8007	1.2091	1.3599	1.643	1.4674	1.4787	2.3771	1.3068	1.3184	1.2628
69.8	1.6552	2.0578	1.6717	2.1804	1.8043	1.5258	2.1026	1.4516	1.8142	2.1162	1.4331	1.3853	1.3901	1.1944	1.1493	2.0014	2.1011	1.6962	1.1076	1.6864	1.9036	1.6786	1.5332	2.3699	1.27	1.4362	1.1093
69.9	1.6258	2.0839	1.4012	2.3827	1.8892	1.7443	2.0866	1.7144	1.803	2.1786	1.5293	1.1771	1.3293	1.2679	1.2356	2.0777	2.3292	1.8571	1.017	1.3683	1.8214	1.672	1.2704	2.2153	1.1268	1.5594	1.3377
70	1.4867	2.1109	1.6032	2.3086	1.4936	1.5473	2.1135	1.6837	1.7434	1.9511	1.7075	1.2299	1.2467	1.1631	1.2373	2.0498	2.388	1.8961	0.9838	1.4462	1.9238	1.4989	1.4958	2.1384	1.1377	1.3016	1.1064
70.1	1.3009	1.7538	1.5297	2.3598	1.7299	1.9714	2.1758	1.9801	1.6387	1.8824	1.5911	1.2595	1.2981	1.0686	1.1202	1.9838	2.3957	2.0672	1.2411	1.35	1.7374	1.6662	1.5057	2.2382	1.1979	1.5161	1.3233
70.2	1.3714	1.7122	1.306	2.2189	1.6028	1.8328	2.1387	1.6901	1.741	2.0114	1.6168	1.2762	1.4383	1.1763	1.0967	1.8885	2.4259	1.9707	1.1796	1.3946	1.428	1.5039	1.6056	2.1318	1.1139	1.4859	1.033
70.3	1.5957	1.8425	1.4282	2.3913	1.7245	1.8803	1.9857	2.01	1.5419	1.8631	1.3659	1.2317	1.5303	1.0921	1.1441	1.9612	2.5944	1.7909	1.2327	1.4918	1.5617	1.6138	1.7876	2.0748	1.119	1.4262	1.1575
70.4	1.6695	1.9937	1.6066	2.4218	1.8145	1.8026	2.1556	2.139	1.4836	2.0631	1.5458	1.2733	1.6256	1.098	1.1598	1.9718	2.4832	1.8415	1.0479	1.4171	1.4638	1.7803	1.369	2.0372	1.0865	1.4537	1.2267
70.5	1.8459	1.829	1.4519	2.2433	1.7207	1.6721	2.0051	2.224	1.4253	1.9193	1.4994	1.4116	1.6016	1.1072	1.0007	2.0063	2.6648	1.6518	1.2512	1.4347	1.6617	1.7074	1.4419	1.9663	1.1904	1.5024	1.1079
70.6	1.5734	1.8786	1.5047	2.2482	1.6897	1.919	2.1921	2.0964	1.5933	1.8576	1.6534	1.3323	1.5153	1.1594	1.0772	2.0751	2.6486	1.825	1.0795	1.3961	1.7975	1.5401	1.4882	2.258	1.0001	1.3083	1.0577
70.7	1.6345	1.8746	1.5783	2.3752	1.5218	1.8533	2.0107	2.2118	1.5307	1.843	1.5822	1.1538	1.7611	1.1161	1.063	1.8822	2.4505	1.9216	1.2099	1.4855	1.7437	1.8885	1.5377	2.0605	1.2014	1.2581	1.0903
70.8	1.6019	2.0068	1.3866	2.2933	1.8146	2.0724	2.1848	2.5747	1.7757	1.9875	1.6658	1.3196	1.4618	1.1338	0.9933	1.9347	2.7665	1.721	1.1875	1.6149	1.4992	1.7684	1.365	2.2785	1.3336	1.5914	1.2414
70.9	1.5706	1.9932	1.3582	2.1173	1.7343	2.007	1.8066	2.381	1.522	1.8206	1.4601	1.264	1.4817	1.1193	1.0601	1.8818	2.4929	1.9266	1.0429	1.5798	1.5214	1.7556	1.3789	2.2281	1.3658	1.5547	1.0715
71	1.5643	2.0477	1.4321	2.3373	1.7478	1.6998	2.0441	2.8707	1.5842	1.9595	1.5185	1.3266	1.6293	0.9561	1.1365	1.9608	2.7408	1.8398	1.0967	1.5702	1.3772	1.7804	1.422	2.4177	1.377	1.2651	1.1886
71.1	1.5754	2.0853	1.4828	2.3125	1.6971	1.9958	2.2804	2.6792	1.5933	2.0138	1.5695	1.2821	1.4192	1.0945	1.1601	1.8818	2.3738	1.7341	1.3736	1.3994	1.5448	1.644	1.3454	2.1642	1.147	1.3964	1.1705
71.2	1.6115	1.9288	1.3083	2.5645	1.7645	1.7875	2.1339	2.546	1.7347	1.8491	1.511	1.2138	1.7206	1.035	1.0201	1.8654	2.4134	1.6023	1.1149	1.6128	1.5681	1.5853	1.4159	2.4803	1.1773	1.5803	1.2132
71.3	1.6023	2.1782	1.5677	2.4976	1.7371	1.7285	2.3635	2.6941	1.5184	2.1683	1.6104	1.623	1.3667	1.0724	1.0241	1.9815	2.8398	1.7559	1.4392	1.488	1.4789	1.4741	1.443	2.4938	1.0804	1.227	1.253
71.4	1.6257	1.9612	1.6258	2.337	1.8033	1.7292	2.0564	2.5199	1.7383	1.8579	1.684	1.3681	1.4545	0.9914	1.1503	1.8323	2.2876	1.6901	0.9853	1.5383	1.6711	1.7486	1.3576	2.3333	1.1095	1.2722	1.1599
71.5	1.5998	1.9071	1.6014	2.5313	1.7932	1.6363	2.2966	2.251	1.6286	2.0101	1.4268	1.5168	1.4767	0.9993	1.2321	1.7664	2.5302	1.6867	1.0619	1.5343	1.8383	1.4001	1.4617	2.1217	1.3465	1.4433	1.1169
71.6	1.641	2.0278	1.6166	2.5773	1.8135	1.5532	1.951	2.1497	1.8132	1.8745	1.4739	1.4256	1.3301	1.1015	1.262	1.9051	2.4863	1.8253	1.0941	1.4245	1.6974	1.4246	1.4539	2.4692	1.0824	1.5614	1.104
71.7	1.6892	1.8972	1.433	2.3479	1.6868	1.7521	2.1244	2.2575	1.6536	2.0008	1.3417	1.3203	1.1851	1.2049	1.0279	1.757	2.3154	1.6292	1.0393	1.6261	1.7039	1.3942	1.4816	2.2899	1.2805	1.4825	1.2476
71.8	1.4486	1.9071	1.4259	2.366	1.7573	1.5308	1.9756	2.1997	1.6806	1.9323	1.4656	1.4641	1.6586	1.216	0.975	1.8359	2.3086	1.5809	1.006	1.5781	1.8032	1.3579	1.4646	2.1865	1.1269	1.3807	1.0914
71.9	1.6188	1.9034	1.593	2.4808	1.7789	1.8712	2.0524	2.187	1.6572	1.9914	1.5924	1.3332	1.3397	1.1205	1.1351	2.0017	2.5602	1.7377	1.0659	1.6965	1.7187	1.6141	1.4522	2.2673	1.2141	1.4536	1.1822
72	1.3395	2.0426	1.459	2.4684	1.8621	1.8722	1.9676	1.8137	1.5923	2.0413	1.4561	1.2966	1.6461	0.9555	0.9104	1.8559	2.6006	1.8296	1.0151	1.6705	1.7371	1.6011	1.4728	2.2219	1.1174	1.4472	1.0771
72.1	1.3878	1.9895	1.4557	2.5027	1.6206	1.7861	2.0039	1.7272	1.534	2.0833	1.5359	1.4941	1.5005	0.9762	1.152	2.0542	2.7695	1.7147	1.1445	1.4052	1.9183	1.4678	1.4455	2.2513	1.2887	1.6399	1.1904
72.2	1.5088	1.7774	1.4146	2.6091	1.6595	1.6809	1.9214	1.7743	1.1061	1.849	1.5148	1.8253	1.4368	0.9327	1.1679	1.9768	2.5117	2.0973	1.0384	1.5174	1.9576	1.6743	1.4262	2.4128	1.3444	1.885	1.1639
72.3	1.6891	1.8063	1.563	2.6532	1.6407	1.5552	2.0675	1.7855	1.3464	1.866	1.5968	1.8937	1.5099	0.9859	1.1774	1.7863	2.5503	1.5114	1.1786	1.4801	1.8231	1.7026	1.3233	2.2892	1.4239	1.588	1.4405
72.4	1.6187	1.8128	1.7268	2.4771	1.676	1.5531	1.9342	1.6024	1.3766	1.9442	1.807	1.8395	1.4946	1.0043	1.0775	1.8665	2.6033	1.5114	1.1752	1.4827	1.8743	1.6021	1.2833	2.2038	1.1594	1.472	1.0419
72.5	1.4686	1.7472	1.6207	2.6708	1.8306	1.6837	2.0448	1.8409	1.2856	2.0223	1.6233	1.9043	1.3581	0.9653	1.0386	1.8872	2.6158	1.694	1.2186	1.4287	1.9503	1.5413	1.4449	2.4037	1.2514	1.4303	1.1487
72.6	1.4798	1.9318	1.5227	2.738	1.6705	1.6849	1.7367	1.5014	1.4675	1.9487	1.7418	1.8624	1.2435	1.2383	1.2255	1.7207	2.4657	1.5355	1.0891	1.4809	1.5376	1.5609	1.28	2.3164	1.1599	1.6195	1.1742
72.7	1.4902	2.0143	1.3647	2.5938	1.7975	1.8462	2.078	1.4081	1.8506	1.8857	1.827	1.9887	1.2168	1.1158	1.2524	1.8328	2.7101	1.8288	1.0262	1.568	1.7409	1.6883	1.5428	2.2517	1.1285	1.4615	1.161
72.8	1.4384	1.8899	1.6161	2.4005	1.7775	1.8754	1.8083	1.607	1.4662	1.9353	1.6462	1.6841	1.2562	1.0847	1.1642	2.0351	2.9196	1.6244	1.022	1.4525	1.9514	1.5247	1.2882	2.2933	1.1532	1.2516	1.1818
72.9	1.4115	2.1041	1.4983	2.6635	1.9174	1.8016	1.9902	1.7292	1.3956	2.0401	1.7368	1.6523	1.2054	1.117	1.1632	1.9803	2.5599	1.7256	1.0394	1.578	1.8747	1.5372	1.3725	2.1592	1.1486	1.49	1.2465
73	1.516	2.4891	1.5116	2.4847	1.9054	1.8424	1.9372	1.4056	1.4064	1.7666	1.5821	1.83	1.2676	1.2988	1.3016	1.8639	2.2934	1.6625	1.0645	1.3645	1.967	1.6318	1.4216	2.3632	1.1298	1.1977	1.2863
73.1	1.3754	2.5704	1.6381	2.6382	1.7901	1.8855	1.8899	1.5797	1.266	1.9006	1.6955	1.8577	1.4429	1.0686	1.2527	2.017	2.2389	1.6977	1.1789	1.3792	1.7533	1.6047	1.2742	2.2616	1.2766	1.2328	1.52
73.2	1.3057	2.1475	1.4149	2.5736	1.7	1.8743	2.0733	1.5242	1.3324	2.0478	1.7104	1.7286	1.2922	1.2119	1.1916	2.0098	2.4277	1.5717	1.0255	1.5169	1.6833	1.7638	1.5427	2.0719	1.2618	1.4735	1.131
73.3	1.4071	2.2558	1.258	2.5824	1.7623	1.8522	1.822	1.6721	1.4394	1.8852	1.7155	1.791	1.2928	1.1156	1.3043	2.0382	2.3021	1.6098	1.1784	1.4993	1.5409	1.5287	1.4209	2.2625	1.2434	1.3075	1.2505
73.4	1.3665	2.0834	1.4069	2.5121	1.745	1.7734	1.9402	1.8333	1.2678	1.8289	1.6788	1.6081	1.333	1.1236	1.1529	1.9942	2.4566	1.5094	1.07	1.4871	1.4924	1.6075	1.3527	2.1389	1.2582	1.6546	1.2016
73.5	1.4199	1.9351	1.4898	2.3802	1.893	1.5595	1.917	1.7163	1.5448	1.9594	1.8268	1.8278	1.3327	1.1553	1.293	1.9368	2.4388	1.5069	0.9701	1.4695	1.4423	1.6861	1.4776	2.1586	0.9993	1.4179	1.2945
73.6	1.4529	2.0677	1.4104	2.566	1.7731	1.5545	1.8551	1.6285	1.3976	1.9199	1.6848	1.7377	1.3216	1.2249	1.238	1.9517	2.1484	1.6984	1.2739	1.4609	1.4236	1.5586	1.5441	2.3168	1.0354	1.6395	1.2006
73.7	1.4772	2.0998	1.432	2.5578	1.8691	1.7645	1.8538	1.7316	1.5465	1.8679	1.5903	1.7456	1.4597	1.0963	1.1848	1.9648	2.2897	1.759	1.2698	1.4872	1.6611	1.6416	1.4946	2.4432	1.137	1.3636	1.1348
73.8	1.6612	2.0238	1.6747	2.5312	1.5492	1.9203	1.954	1.8126	1.557	1.7805	1.5151	1.6661	1.4687	1.2741	1.1965	2.2169	2.2235	1.6394	1.1613	1.418	1.498	1.7302	1.8252	2.1041	1.2173	1.3928	1.3908
73.9	1.5695	2.1387	1.4737	2.3977	1.7934	1.8324	2.1886	1.443	1.6745	1.9405	1.4159	1.8428	1.3353	1.0913	1.0303	1.7383	2.1622	1.5939	1.2507	1.4955	2.0072	1.7143	1.494	2.0831	1.1696	1.2617	1.462
74	1.6756	2.3245	1.4946	2.621	1.6149	1.694	2.158	1.9203	1.54	1.9121	1.4405	1.7345	1.5357	1.3958	0.9481	1.8936	2.2013	1.5466	1.1771	1.6484	1.8857	1.8508	1.4871	2.1743	1.0423	1.4033	1.2556
74.1	1.4826	2.152	1.3189	2.638	1.6635	1.9038	2.0363	1.8477	1.5176	1.7702	1.4302	1.957	1.4825	1.1953	0.9766	1.915	2.5951	1.6602	1.5658	1.7177	1.8928	1.6335	1.4216	2.1752	1.0587	1.3204	1.4367
74.2	1.7088	2.1983	1.4958	2.3736	1.7593	1.5297	1.9962	1.2991	1.4404	1.812	1.6765	1.9478	1.4656	1.2854	0.9771	1.9477	2.3079	1.851	1.262	1.4349	2.0497	1.4509	1.4149	2.2792	1.1571	1.2361	1.14
74.3	1.4956	2.1907	1.7091	2.647	1.8227	1.7148	2.1344	1.5985	1.6362	1.9766	1.5335	1.9205	1.4	1.1346	1.0283	2.1181	2.1675	1.9902	1.2177	1.2815	1.9452	1.5501	1.603	2.1981	1.17	1.3368	1.2743
74.4	1.4796	2.2922	1.5712	2.3341	1.9355	1.5675	2.1607	1.8148	1.5961	2.2908	1.5827	2.1267	1.188	1.123	0.8946	1.8171	2.0463	1.7408	1.0956	1.3579	2.0409	1.7611	1.6508	2.2811	1.2868	1.489	1.1745
74.5	1.5799	2.0138	1.4343	2.1741	1.9565	1.7278	1.9074	1.7769	1.5585	1.9566	1.6678	1.7634	1.1995	1.2053	1.0111	1.8752	2.2715	1.8806	1.1102	1.4629	1.8511	1.4866	1.3571	2.292	1.3035	1.4346	1.3672
74.6	1.3987	2.0963	1.5988	2.0671	1.8984	1.6546	2.137	1.5777	1.6357	1.8108	1.5751	1.5403	1.4263	1.3252	0.9273	1.9675	2.3992	1.7848	1.1428	1.4932	1.9734	1.4519	1.5404	2.3157	1.1978	1.3486	1.244
74.7	1.4722	1.9305	1.262	2.3192	1.9048	1.6526	2.1123	1.5651	1.5833	2.0592	1.5267	1.3362	1.358	1.2809	1.0808	1.7952	2.0929	1.7894	1.3115	1.6062	1.9746	1.5463	1.419	2.1943	1.2462	1.4248	1.3519
74.8	1.3727	2.4057	1.6661	2.3192	2.0439	1.6833	2.0965	1.4999	1.7407	1.9262	1.5381	1.2531	1.5125	1.2262	0.9877	1.8291	2.2767	1.6379	1.0887	1.619	1.9621	1.4343	1.7164	2.5059	1.2474	1.2645	1.199
74.9	1.4486	2.2096	1.4599	2.3465	1.9476	1.494	1.9993	1.9088	1.8773	2.0154	1.7751	1.2755	1.7068	1.221	0.9374	1.9128	2.3339	2.156	1.2807	1.483	1.7666	1.5018	1.4138	2.5139	0.9715	1.4335	1.2364
75	1.4946	1.8688	1.6628	2.113	1.6836	1.5435	1.8936	1.8776	1.6297	1.8241	1.6083	1.3541	1.3507	1.1858	0.8269	2.0255	1.9177	1.7429	1.0997	1.357	1.6783	1.5561	1.4352	2.4394	1.0933	1.8699	1.1319
75.1	1.5012	1.9053	1.7678	2.1273	1.8381	1.4729	1.7539	1.6175	1.6966	2.0783	1.7275	1.2581	1.3022	1.2754	0.8779	1.984	2.1289	1.7782	1.2675	1.3589	1.8344	1.8652	1.6804	2.5889	1.0123	1.478	1.2303
75.2	1.5117	2.1154	1.7894	2.1361	1.6877	1.6915	1.7628	1.6993	1.7223	1.8429	1.7347	1.3871	1.4493	1.3031	0.8021	1.9265	2.2074	1.7518	1.1844	1.4347	1.7704	1.5225	1.5692	2.5626	1.1334	1.7225	1.3132
75.3	1.4828	2.1371	1.5481	1.9673	1.7483	1.607	1.9559	1.7096	1.9236	1.8629	1.6589	1.2579	1.4281	1.3704	0.9093	2.1229	2.333	1.7593	1.2063	1.3373	1.888	1.7221	1.3625	2.3095	1.1223	1.8218	1.1591
75.4	1.3806	2.0306	1.7909	2.1186	1.8322	1.6619	1.8513	1.5932	1.8424	1.8642	1.7032	1.3095	1.4165	1.1931	0.9481	1.8911	2.4201	1.7861	1.0122	1.3799	2.1612	1.4946	1.5704	2.478	1.1212	1.393	1.1527
75.5	1.6347	1.8805	1.6819	2.2038	1.6253	1.9615	1.6862	1.6115	1.404	1.9381	1.7834	1.2289	1.5252	1.1992	1.1199	1.9684	2.5757	2.0223	1.2223	1.5753	1.9523	1.6349	1.489	2.4502	1.0822	1.7969	1.1942
75.6	1.4146	2.1423	1.5474	2.1335	1.5829	2.0425	1.6369	1.5377	1.5771	1.8965	1.717	1.2426	1.5514	1.1903	0.8894	1.8498	2.4055	1.82	1.0357	1.4698	1.9652	1.6213	1.6541	2.4343	1.1248	1.3712	1.3064
75.7	1.361	2.2685	1.7501	2.0568	1.6811	1.6109	1.9186	1.5261	1.7026	1.9102	1.7092	1.283	1.3154	1.1403	0.9573	2.0089	2.5182	1.8803	1.0608	1.3962	2.0397	1.7633	1.6085	2.4067	1.0938	1.4323	1.2887
75.8	1.556	2.1708	1.7156	1.9451	1.6779	1.4431	1.9612	1.5471	1.5476	2.08	1.5604	1.1905	1.4662	1.1963	0.8728	1.9221	2.1764	1.6018	0.958	1.4341	1.9649	1.4751	1.5571	2.523	1.1023	1.7176	1.2046
75.9	1.4477	2.385	1.6039	2.0404	1.6214	1.7988	2.0175	1.5741	1.6654	1.9983	1.5711	1.3921	1.3875	1.1906	0.9425	1.8957	2.263	1.7461	1.1598	1.4341	1.9011	1.4942	1.5086	2.4486	1.0813	1.5092	1.3168
76	1.6174	2.2266	1.7734	1.9773	1.691	1.6883	2.005	1.6519	1.4785	2.2089	1.5231	1.3541	1.4658	1.3939	1.0486	2.0071	2.1728	1.789	1.1186	1.4267	1.6894	1.4989	1.346	2.6038	1.2099	1.3227	1.194
76.1	1.5582	2.153	1.6299	2.1261	1.6522	1.7108	2.0629	1.454	1.5287	2.2143	1.7857	1.1856	1.4073	1.4027	0.9176	2.1099	2.5487	2.0133	1.1166	1.4974	1.8519	1.6497	1.447	2.7766	1.1957	1.4131	1.1995
76.2	1.4828	2.0582	1.6074	2.2919	1.7675	1.537	2.1748	1.5412	1.3757	2.1445	1.6416	1.357	1.2133	1.2358	0.8065	2.0953	2.2696	1.8469	1.2509	1.4576	1.6767	1.5012	1.6071	2.9584	1.174	1.4168	1.4351
76.3	1.7447	2.197	1.5469	2.1251	1.6637	1.5837	1.9526	1.4081	1.5603	2.0092	1.6744	1.2226	1.5144	1.1395	0.9598	1.987	2.5511	1.9742	1.2288	1.5381	1.8654	1.4267	1.4571	3.0438	1.1339	1.4362	1.0818
76.4	1.7923	2.2682	1.6116	2.4673	1.6586	1.8997	1.9955	1.295	1.5992	1.8233	1.7427	1.2201	1.27	1.2398	0.9107	1.9508	2.2032	1.6308	1.2049	1.4157	1.5555	1.7366	1.4396	2.949	1.1144	1.3471	1.0208
76.5	1.7023	1.9862	1.8036	2.5433	1.5479	1.6652	1.8059	1.2874	1.5458	1.8594	2.0098	1.2524	1.416	1.2815	0.8266	1.8079	2.1306	1.6701	1.1534	1.5126	1.811	1.3266	1.4292	2.9832	1.1061	1.4925	1.162
76.6	1.7646	2.2163	1.3817	2.2158	1.6307	1.7195	2.1166	1.9188	1.5429	1.8228	1.994	1.2246	1.4852	1.1817	0.9239	1.8428	2.0561	1.9306	1.2881	1.4487	1.8701	1.613	1.4075	2.9595	1.2665	1.7196	1.228
76.7	1.5528	1.827	1.3374	2.3798	1.7019	1.6129	2.0851	1.7797	1.6331	2.1121	1.758	1.1948	1.4044	1.2314	1.0285	1.788	2.2345	1.8606	1.3035	1.4891	1.6757	1.5961	1.3199	2.9733	1.0983	1.6654	1.1974
76.8	1.3679	1.9065	1.324	2.2011	1.6061	1.5154	1.7319	1.7449	1.6544	2.073	1.8699	1.1766	1.3957	1.3179	0.8273	1.9159	2.4592	1.8192	1.5192	1.3672	1.7558	1.5823	1.4073	3.0564	1.2162	1.7375	1.1417
76.9	1.5843	2.0489	1.6806	2.1862	1.63	1.8468	1.7226	1.3866	1.6692	1.9603	1.7699	1.2083	1.3547	1.268	0.9221	1.8366	2.2769	1.681	1.4949	1.4546	2.019	1.5435	1.4623	3.066	1.1192	1.8115	1.3784
77	1.5283	2.1974	1.5156	2.1833	1.5217	1.7679	1.7164	1.2492	1.5722	1.9778	1.7178	1.1619	1.2389	1.2729	0.928	1.861	2.62	1.7901	1.5147	1.5244	1.6993	1.5717	1.4188	3.142	1.1099	1.697	1.274
77.1	1.6591	2.1617	1.5667	2.0687	1.6724	1.7431	1.7001	1.6884	1.897	2.1741	1.6903	1.4303	1.199	1.2217	0.9449	1.9511	2.507	1.7741	1.4157	1.3744	2.0061	1.7799	1.3932	3.1114	0.9381	1.7527	1.2096
77.2	1.6351	2.2235	1.7786	2.2468	1.6736	1.6709	2.0917	1.2645	1.6413	2.1458	1.9493	1.408	1.1336	1.2375	1.1428	2.0528	2.7331	1.5744	1.5299	1.5499	1.8817	1.5515	1.46	2.9994	0.9858	1.3663	1.198
77.3	1.7263	2.0231	1.5355	2.3793	1.579	1.559	1.9189	1.2372	1.5723	2.2696	1.6963	1.4794	1.3888	1.2975	1.1578	2.0042	2.7054	1.6508	1.6742	1.5426	1.9396	1.6539	1.5233	3.121	0.9294	1.1828	1.1494
77.4	1.6507	1.8013	1.9177	2.3318	1.6043	1.7589	2.0332	1.3463	1.4684	1.9946	1.825	1.5341	1.3321	1.1402	0.92	1.9223	2.7733	1.7389	1.4942	1.5721	1.9816	1.5651	1.3415	3.0318	0.9417	1.3608	1.2089
77.5	1.7437	1.9298	1.7921	2.5228	1.6061	1.8221	2.0395	1.4217	1.4634	1.9752	1.7383	1.4957	1.3168	1.1791	0.9778	1.9969	2.5051	1.7317	1.5751	1.4457	1.7378	1.5441	1.4225	2.8913	1.1871	1.1856	1.1037
77.6	1.9343	1.9203	1.8464	2.1405	1.8975	1.4864	1.9078	1.4521	1.832	2.3047	1.9432	1.7255	1.3299	1.4455	0.9675	2.037	2.5759	1.8293	1.4528	1.3989	1.7394	1.7634	1.3602	2.7659	1.2235	1.4429	1.2328
77.7	1.6701	2.1668	2.046	2.2461	1.7023	1.4727	2.0022	1.56	1.7011	2.4828	1.7244	1.7175	1.4343	1.2325	0.9377	1.8815	2.3735	1.6236	1.3918	1.5283	1.5852	1.8443	1.4944	2.7597	1.1336	1.4448	1.3653
77.8	1.7435	2.1747	1.8863	2.4593	1.7407	1.7717	1.9955	1.5853	1.7251	2.19	1.7686	1.8407	1.4502	1.4259	0.876	1.9289	2.2485	1.8923	1.4418	1.5052	1.8625	1.6363	1.5002	2.8961	1.269	1.7324	1.284
77.9	1.6326	2.3065	1.8489	2.2847	1.6797	1.8594	2.3642	1.435	1.7821	2.1649	1.632	1.8411	1.3237	1.6248	0.82	1.7993	2.2038	1.8145	1.3469	1.4425	1.58	1.6458	1.4671	2.8233	1.1799	1.6199	1.2249
78	1.5998	1.7567	1.6133	2.2943	1.6428	1.7491	2.1848	1.5631	1.6216	2.0122	1.5902	1.8659	1.2824	1.6675	0.8664	1.7741	2.3476	1.9377	1.5914	1.3567	1.7212	1.5461	1.4688	2.874	1.1521	1.6231	1.1497
78.1	1.6707	2.0549	1.7831	2.1657	1.76	1.7499	2.1453	1.527	1.8331	2.243	1.7463	2.0078	1.3351	1.6977	0.9476	1.8889	2.375	1.8068	1.3489	1.4577	1.7035	1.6031	1.482	2.9165	1.3579	1.6617	1.228
78.2	1.5095	2.1118	1.4994	2.2753	1.6601	1.6623	2.0458	1.9428	1.8465	2.1127	1.7471	2.1265	1.6423	1.5969	1.0346	1.7906	2.3901	1.8333	1.113	1.6971	1.7269	1.6267	1.3847	2.7443	1.282	1.703	1.3605
78.3	1.483	2.1425	1.4424	2.3965	1.6269	1.7489	2.0728	1.5672	1.7695	2.1618	1.6604	2.0452	1.4924	1.539	0.8712	1.8556	1.9615	1.6731	1.3146	1.5257	1.5533	1.6665	1.5363	2.6863	1.0951	1.8921	1.2405
78.4	1.5874	2.3335	1.5274	2.2959	1.8435	1.8767	2.3547	1.5415	1.7311	2.056	1.5436	1.9969	1.4081	1.5979	0.8691	1.8701	2.3259	1.7726	1.162	1.3743	1.6986	1.4251	1.4978	2.5757	1.2008	1.5646	1.1842
78.5	1.6203	2.4035	1.5904	2.7028	1.7792	1.804	2.1193	1.4184	1.8827	1.9729	1.6789	2.0771	1.3293	1.6068	0.9356	1.8273	2.4716	1.9199	1.2862	1.3404	1.7977	1.4201	1.4762	2.4106	0.8703	1.4961	1.1243
78.6	1.6981	2.1241	1.5065	2.6741	1.7876	2.0408	2.0405	1.4584	1.9046	2.0668	1.5518	2.211	1.4052	1.5117	0.8963	1.8717	2.284	1.9851	1.2896	1.3942	1.5445	1.6157	1.4862	2.6906	1.0938	1.5312	1.1685
78.7	1.6345	2.2188	1.5455	2.6042	1.8388	1.5346	2.1287	1.5904	1.748	2.1523	1.7472	2.1291	1.2072	1.4908	0.8595	1.7166	2.2645	1.9474	1.3683	1.443	1.6708	1.6383	1.3769	2.6789	0.9245	1.569	1.218
78.8	1.6198	2.1429	1.6459	2.4212	1.7762	1.8473	1.9401	1.6041	1.6417	2.3007	1.6547	2.095	1.2112	1.3766	0.7084	1.8129	2.3486	1.7366	1.16	1.5737	1.7882	1.5569	1.3482	2.7785	1.1617	1.6736	1.1964
78.9	1.9205	2.4457	1.7678	2.5178	1.7042	1.8486	1.8193	1.3296	1.6675	2.0997	1.6215	1.9152	1.2163	1.3356	0.8061	1.7696	2.7607	1.6334	1.1539	1.5622	1.7999	1.4833	1.3591	2.5492	1.2193	1.4608	1.4618
79	1.6848	2.3405	1.6374	2.294	1.8577	1.7754	1.8522	1.6002	1.6578	2.0247	1.6844	1.9814	1.2506	1.4258	0.7274	1.8639	2.5298	1.4873	1.1222	1.3984	1.7336	1.681	1.3753	2.8562	1.0997	1.6308	1.0568
79.1	1.7353	1.9294	1.746	2.3643	1.9104	1.7917	1.721	1.5318	1.6133	1.874	1.634	1.9546	1.266	1.5231	0.827	1.9676	2.6546	1.6296	1.0085	1.4043	1.7611	1.6669	1.5518	2.5772	1.0368	1.2495	1.4071
79.2	1.7335	1.9881	1.8	2.1943	1.8833	1.5565	1.9022	1.3991	1.6821	2.2709	1.6954	1.928	1.543	1.4099	0.8181	1.8765	2.512	1.6942	0.9791	1.4232	1.4616	1.618	1.3502	2.5353	1.2092	1.3303	1.2925
79.3	1.6204	1.9907	1.6371	2.1523	1.7625	1.7136	1.8724	1.4085	1.7597	1.8675	1.8302	2.1581	1.5018	1.5658	0.8593	1.8737	2.3682	1.4614	0.994	1.5818	1.6852	1.9026	1.3952	2.6113	1.0341	1.4988	1.0945
79.4	1.716	2.0978	1.5824	2.4506	1.5829	1.93	2.2571	1.474	1.7607	2.3059	1.9917	2.3173	1.4035	1.3713	0.8734	1.9006	2.3317	1.7482	1.1015	1.5403	1.5443	1.8685	1.512	2.5698	1.1169	1.5587	1.148
79.5	1.6968	2.0976	1.9442	2.2232	1.6327	1.6828	2.0263	1.8383	1.533	2.3019	1.6945	2.276	1.2606	1.5769	0.9905	1.7817	2.2657	1.5547	1.2526	1.2756	1.4619	1.4746	1.4354	2.5687	0.9912	1.9365	1.2662
79.6	1.349	1.8536	1.6643	2.4208	1.7197	1.92	1.7526	1.3863	1.5535	2.3641	1.9747	1.9727	1.2982	1.5292	0.8751	1.8228	2.5747	1.6743	1.0106	1.3308	1.4105	1.6599	1.5234	2.8005	1.0212	1.557	1.2607
79.7	1.5528	2.1405	1.5462	2.3384	1.6394	1.7014	1.7013	1.6717	1.5983	2.2384	1.8872	2.0049	1.4213	1.3348	0.9305	1.8433	2.2938	1.8992	1.0843	1.5408	1.506	1.5583	1.6228	2.7314	0.9372	1.6503	1.2369
79.8	1.7479	2.15	1.8397	2.3302	1.6212	1.6936	1.861	1.6706	1.6874	2.2437	1.8568	1.8416	1.4721	1.5673	1.1729	1.9426	2.2879	1.7015	0.9708	1.6879	1.681	1.5029	1.378	2.6061	1.0985	1.3721	1.1651
79.9	1.6509	2.0204	1.6554	2.3903	1.7821	1.8865	1.7908	1.4588	1.5159	2.3427	2.1598	1.8621	1.3414	1.5179	1.0228	1.917	2.3991	1.7864	1.0486	1.5115	1.9704	1.6627	1.4133	2.4771	1.0338	1.4148	1.2653
80	1.7242	2.0699	1.5697	2.2924	1.5928	1.9748	1.9586	1.4168	1.6135	2.0027	1.7695	1.7503	1.525	1.5004	0.8412	2.106	2.2648	1.8773	0.9861	1.235	1.6579	1.6307	1.4623	2.3791	0.9748	1.3991	1.3516
80.1	1.673	2.0976	1.8037	2.4683	1.8223	1.9531	1.8448	1.3868	1.4439	2.2769	1.7547	1.869	1.4277	1.4414	0.858	1.984	2.1156	1.8314	1.0221	1.4277	1.6478	1.6042	1.6577	2.7075	1.0033	1.4544	1.2458
80.2	1.5963	2.02	1.5135	2.3464	1.8116	1.9756	1.7267	1.4126	1.6479	2.2047	1.8043	2.2623	1.3001	1.3473	0.9337	1.974	2.2845	1.6983	0.9075	1.4909	1.8039	1.7808	1.5526	2.821	1.1499	1.7699	1.1919
80.3	1.7299	1.8846	1.6722	2.3309	1.8663	1.7406	1.7477	1.5287	1.6875	2.2834	1.7124	1.9284	1.6315	1.5069	0.989	2.0679	2.285	1.6374	1.1197	1.6202	1.558	1.6843	1.6622	2.611	1.079	1.7744	1.208
80.4	1.6531	1.662	1.846	2.2478	1.7689	1.8685	1.7575	1.3976	1.7299	2.0434	1.7734	1.655	1.6424	1.6307	0.8422	1.9666	2.3174	1.8487	1.0015	1.4147	1.6526	1.7705	1.4916	2.4697	1.033	1.8974	1.2474
80.5	1.7516	1.6339	1.702	2.4047	1.7752	1.8262	1.498	1.27	1.6344	1.9847	1.5721	2.0583	1.5062	1.5672	0.7782	1.914	2.3289	1.9587	0.8737	1.5276	1.751	1.8913	1.5681	2.4577	1.0327	1.4532	1.1271
80.6	1.6276	1.6566	1.6576	2.4804	1.872	1.7553	1.7423	1.3219	1.6827	2.0858	1.6748	1.9148	1.5184	1.4748	1.0687	1.9166	2.4162	1.8419	0.7965	1.4944	1.5734	1.7223	1.4672	2.7193	1.0423	1.4319	1.1722
80.7	1.6476	1.7364	1.7145	2.5689	1.6899	1.6965	1.571	1.2816	1.6167	1.8624	1.658	2.0393	1.5375	1.4395	1.0705	1.9987	2.1898	2.0115	1.0912	1.4751	1.8152	1.5321	1.4267	2.4822	1.1395	1.4612	1.2017
80.8	1.7577	1.7891	1.5509	2.6848	1.6069	1.6878	1.7176	1.5965	1.4713	1.9911	1.8293	1.9166	1.4782	1.3997	0.9718	2.1688	2.0075	1.7864	1.1448	1.536	1.65	1.4076	1.5421	2.4821	1.017	1.3123	1.2206
80.9	1.8394	1.8465	1.4139	2.6745	1.6203	1.7691	1.6573	1.5529	1.6937	2.0463	1.9003	1.5855	1.6014	1.5725	1.1963	1.9953	1.994	1.8427	1.0614	1.449	1.7166	1.5854	1.5864	2.506	0.9842	1.5785	1.0428
81	1.7201	2.1371	1.4804	2.7208	1.8006	2.0203	1.5297	1.3553	1.8189	1.9073	1.8593	1.7986	1.5405	1.39	0.9236	1.9215	2.1481	1.7087	1.1709	1.3136	1.9524	1.2816	1.5028	2.3017	1.215	1.2497	1.1628
81.1	1.6048	2.0818	1.5014	2.7166	1.6933	1.9758	1.6495	1.3988	1.841	2.2417	1.7355	2.1581	1.4724	1.4019	0.9992	1.8749	2.2236	1.7475	1.514	1.5203	1.8344	1.4251	1.5297	2.5587	1.1973	1.4196	1.1592
81.2	1.5838	2.1152	1.6208	2.6289	1.6497	1.559	1.6999	1.4842	1.8672	2.057	2.029	1.9866	1.373	1.5977	0.9902	2.0693	2.2253	1.7727	1.1433	1.3673	1.7647	1.4885	1.5342	2.4411	1.0226	1.3023	1.114
81.3	1.6021	1.9633	1.7023	2.7231	1.7769	1.7792	1.6208	1.3758	1.8822	1.8448	1.924	1.8821	1.4826	1.5795	1.0903	2.0243	2.1573	1.8376	1.318	1.6201	1.8078	1.3541	1.465	2.6718	1.0489	1.7307	1.2589
81.4	1.6433	1.7887	1.8245	2.4467	1.7195	1.707	1.7497	1.4276	1.762	2.153	2.1384	1.7093	1.7098	1.4574	0.8852	1.7854	2.0927	1.7983	0.8613	1.4894	1.8553	1.4152	1.4445	2.6875	1.1509	1.826	1.1983
81.5	1.5694	1.6466	1.7145	2.5032	1.762	1.706	1.8535	1.5175	1.742	2.2163	1.8972	1.6269	1.6938	1.3998	1.0757	1.9877	2.1339	1.9198	0.8587	1.4316	1.941	1.4431	1.5968	2.7414	1.0031	1.7785	1.1075
81.6	1.5904	1.9438	1.6539	2.342	1.7796	1.7897	1.7063	1.5639	1.6739	2.0287	1.8554	1.8357	1.5324	1.5205	0.9725	1.9235	2.1546	1.8543	1.0785	1.4271	1.7778	1.6573	1.6396	2.887	0.9691	1.6184	1.0551
81.7	1.463	1.765	1.6102	2.588	1.8763	1.6189	1.8226	1.4209	2.0553	2.0577	1.9396	1.8135	1.4029	1.5386	1.0731	2.0807	2.1982	1.546	1.0721	1.3862	1.63	1.5908	1.4392	2.4203	0.8721	1.6031	1.3474
81.8	1.487	1.8345	1.3957	2.8014	1.7785	1.5722	1.7942	1.8569	1.9549	2.0765	1.9384	2.2056	1.4259	1.5036	1.0588	2.0257	2.1569	1.6305	1.1324	1.6006	1.4571	1.5827	1.5331	2.3219	1.172	1.585	1.1559
81.9	1.3724	2.2545	1.619	2.5724	1.799	1.5334	1.8729	1.5773	1.7359	2.2228	1.9218	1.8718	1.6934	1.5717	1.126	1.9264	2.278	1.8443	1.1721	1.6444	1.4457	1.6343	1.6144	2.3509	1.0814	1.403	1.1985
82	1.3941	1.5987	1.6326	2.5342	1.8146	1.5082	2.0231	1.7188	1.7187	1.9668	2.0261	1.8966	1.5501	1.6516	1.0176	1.9919	2.0547	1.6488	1.1649	1.5443	1.3392	1.5724	1.6076	2.4141	1.0817	1.6825	1.372
82.1	1.5391	1.7538	1.7195	2.5456	1.6856	1.669	1.6817	1.5444	1.749	1.9882	1.9716	1.8152	1.4883	1.294	0.7899	1.995	2.1582	1.8092	1.1139	1.3071	1.4934	1.3224	1.6458	2.5066	1.1044	1.6203	1.2507
82.2	1.5285	1.9193	1.399	2.425	1.8275	1.6771	1.7445	1.7979	1.7065	1.9179	1.6806	1.9616	1.6308	1.4256	1.2034	1.884	2.0554	1.671	1.3353	1.2706	1.5845	1.6089	1.3461	2.6388	1.02	1.6008	1.2615
82.3	1.6327	2.1972	1.5238	2.4891	1.8464	1.7706	1.6525	1.6591	1.8499	2.0209	1.8629	1.8584	1.2622	1.5443	0.8812	1.9251	2.1595	1.5708	1.1814	1.4815	1.7019	1.556	1.3406	2.5945	0.9978	1.8842	1.2756
82.4	1.8148	2.058	1.5576	2.5011	1.7893	1.7211	1.646	1.7468	1.8027	2.074	1.6282	1.9063	1.3244	1.6204	1.1898	1.9822	2.2012	1.6764	1.267	1.3409	2.0667	1.5008	1.378	2.4863	1.0884	1.991	1.302
82.5	1.6787	2.0757	1.6384	2.5463	1.7989	1.6449	1.8272	1.6219	1.7356	1.8184	1.9646	1.6572	1.2141	1.385	1.2506	1.984	2.2212	1.6421	1.5271	1.3028	1.8975	1.325	1.6183	2.5791	1.2648	1.8759	1.2787
82.6	1.675	1.9729	1.5855	2.5556	1.7604	1.758	1.6072	1.7317	1.7291	1.9971	2.0135	1.8382	1.4843	1.3604	1.1306	1.9209	2.3297	1.6696	1.1468	1.3878	1.9009	1.331	1.4744	2.5695	1.0102	1.583	1.2081
82.7	1.6024	1.9873	1.5496	2.4437	1.7394	1.7278	1.7186	1.7271	1.7401	1.8984	2.2865	1.7543	1.3374	1.4912	0.9908	1.98	2.1589	1.5538	1.1312	1.1858	1.6461	1.5201	1.5815	2.3438	0.9976	1.631	1.1491
82.8	1.6056	2.0916	1.4437	2.5664	1.8894	1.5655	1.8197	1.505	1.4413	2.075	1.7294	2.006	1.6681	1.5871	1.1361	2.0823	2.2097	1.6843	1.1556	1.1707	1.7746	1.5081	1.7381	2.5963	0.9646	1.7547	1.1078
82.9	1.6725	2.1397	1.3687	2.307	1.7854	1.4392	1.865	1.8165	1.8772	2.0414	2.1285	1.773	1.2698	1.4219	1.0045	1.8636	1.9944	1.8789	1.2087	1.2257	1.8391	1.554	1.4798	2.4172	1.1579	1.6464	1.1698
83	1.5578	2.1814	1.427	2.4973	1.8366	1.4607	1.495	1.4175	1.7367	1.9776	1.7673	1.9541	1.461	1.5573	1.1194	2.0355	2.0644	1.8598	1.1267	1.4229	1.8588	1.5633	1.7779	2.473	1.1432	1.8603	1.2077
83.1	1.5382	2.0336	1.4633	2.3228	1.8313	1.57	2.2312	1.5946	1.7894	2.07	1.8309	1.8818	1.627	1.4387	1.1249	1.8093	2.2414	1.9407	1.1181	1.381	1.9614	1.4288	1.5217	2.5758	0.9562	1.8859	1.0846
83.2	1.3782	2.0819	1.3617	2.4464	2.0298	1.8585	2.1936	1.3881	1.8216	2.0287	2.0262	1.8569	1.4874	1.4519	1.1042	1.9441	2.1823	1.7124	1.3339	1.2595	2.0755	1.3898	1.4973	2.4927	1.2	1.5789	1.2226
83.3	1.5182	2.2087	1.4266	2.3651	1.7901	1.8753	1.8911	1.6567	1.7723	2.0021	1.9255	1.9304	1.7663	1.396	1.1333	1.789	2.3634	1.6252	1.1169	1.3819	2.0578	1.4512	1.4638	2.5378	1.3057	1.6341	1.2067
83.4	1.7084	2.095	1.5247	2.3875	1.7659	1.8467	1.6512	1.7267	1.8158	2.0089	1.6732	2.2783	1.6382	1.5075	1.2178	1.9187	2.3283	1.6145	1.1143	1.2017	1.777	1.3223	1.4792	2.3055	1.3662	1.7537	1.2618
83.5	1.8559	1.9481	1.4993	2.4788	1.6705	1.7004	1.7621	1.5631	1.7459	1.9314	1.5107	1.8766	1.5111	1.3098	1.0301	1.8511	2.3914	1.691	1.3647	1.3192	1.8582	1.6725	1.5783	2.253	1.2818	1.6567	1.2315
83.6	1.5877	1.9075	1.3644	2.5674	1.6744	1.5067	1.9678	1.5662	1.7429	2.0167	1.4962	1.9813	1.5192	1.5781	0.928	1.9847	2.4609	1.7912	1.2834	1.2664	1.7023	1.8053	1.8354	2.2057	1.3386	1.666	1.1773
83.7	1.7395	1.7866	1.3241	2.6675	1.7854	1.4814	1.9739	1.6651	1.5238	2.0436	1.8016	1.8583	1.7205	1.3896	1.0646	1.8279	2.3349	1.8017	1.2008	1.2807	1.8612	1.6446	1.6859	2.2821	1.2716	1.3262	1.3072
83.8	1.5754	2.3258	1.377	2.5481	1.7392	1.607	2.2585	1.5313	1.664	1.843	1.6269	1.9152	1.663	1.4321	0.9936	1.9935	2.2194	1.7985	1.3332	1.2195	1.8884	1.7849	1.6206	2.1931	1.308	1.3418	1.354
83.9	1.6192	2.2019	1.3699	2.5636	1.9527	1.5167	2.2257	1.4143	1.6711	1.9917	1.6895	1.9713	1.5597	1.4602	1.1044	2.0589	2.1571	1.8061	1.3678	1.4267	2.0203	1.3475	1.4895	2.4034	1.3024	1.4504	1.067
84	1.6042	2.0557	1.3371	2.5342	1.9174	1.4618	1.9461	1.4046	1.5785	1.8907	1.6874	1.8406	1.5818	1.6557	0.953	2.0615	2.1217	1.789	1.3045	1.5322	1.638	1.4514	1.6035	2.2592	1.3011	1.4452	1.1339
84.1	1.4847	2.0625	1.2036	2.5695	1.8123	1.3827	2.0443	1.3463	1.6723	1.9076	1.6873	1.9972	1.5592	1.7126	0.9374	1.9829	2.2604	1.9294	1.2006	1.5692	1.8711	1.4065	1.7697	2.1541	1.396	1.6283	1.1171
84.2	1.5589	1.9718	1.4318	2.5098	1.8439	1.4449	2.187	1.5101	1.7321	1.9781	1.6423	1.8898	1.4043	1.6257	0.8969	1.9737	2.3264	1.6318	1.3256	1.3885	1.7468	1.3936	1.8105	2.0969	1.2652	1.5321	0.9978
84.3	1.5073	1.9535	1.4318	2.3886	1.8252	1.5599	1.9905	1.5869	1.8519	1.8769	1.3973	2.0012	1.7504	1.6276	1.1692	1.9396	2.2137	1.6931	1.3328	1.3082	1.879	1.423	1.6194	2.0829	1.0818	1.4021	1.0877
84.4	1.6873	2.4112	1.3702	2.4711	1.6501	1.488	2.0163	1.5338	1.6251	1.8934	1.4607	1.8531	1.5208	1.6531	0.8885	1.7385	2.5881	1.7098	1.3095	1.3003	1.6435	1.4971	1.7102	2.0784	1.1769	1.9212	1.125
84.5	1.6386	1.9223	1.2468	2.4979	1.7008	1.6514	1.7462	1.6192	1.5472	1.8396	1.6164	1.8136	1.5235	1.5607	0.8976	1.7588	2.5333	1.5159	1.4268	1.4044	1.6797	1.6605	1.6593	2.1822	1.1188	1.5641	1.2149
84.6	1.6369	1.9163	1.3891	2.4162	2.0364	1.4476	2.0546	1.6236	1.7117	1.9807	1.4624	1.509	1.4364	1.6422	0.7079	1.7588	2.4929	1.7668	1.6187	1.3462	1.4496	1.3211	1.4568	2.2231	1.2268	1.6276	1.1287
84.7	1.6014	2.0513	1.4462	2.4614	1.8074	1.3257	1.9701	1.9745	1.6337	1.9305	1.5504	1.705	1.5055	1.5066	0.8516	1.5819	2.4803	1.8188	1.3423	1.2455	1.4535	1.4251	1.5237	2.2296	1.0145	1.4537	1.2124
84.8	1.5017	1.9703	1.2425	2.4333	1.6839	1.3548	2.0542	2.0459	1.5757	2.1483	1.4059	1.5667	1.717	1.6486	0.7673	1.6789	2.3663	1.6442	1.244	1.3325	1.4511	1.2724	1.3942	2.0342	0.954	1.5453	1.266
84.9	1.4691	1.5985	1.4026	2.4461	1.6483	1.3808	1.9973	1.8671	1.6895	1.9822	1.5826	1.8126	1.8339	1.6236	0.7557	1.8602	2.0971	1.7796	1.1788	1.4174	1.6124	1.4974	1.4808	2.1048	0.9435	1.5476	1.1669
85	1.4599	1.7026	1.3652	2.4864	1.7316	1.4095	1.9794	1.875	1.583	1.9295	1.4781	1.5841	1.4193	1.5796	0.8666	1.8148	2.2675	1.8343	1.3609	1.3495	1.4421	1.518	1.4868	2.1469	1.0383	1.8215	1.0433
85.1	1.396	1.6862	1.3271	2.3832	1.8003	1.322	1.8078	1.6987	1.7032	2.1137	1.4168	1.7504	1.6315	1.3818	0.8314	1.9114	2.0548	1.6217	1.4686	1.3515	1.5892	1.5438	1.3211	2.2199	1.3434	1.7364	1.1728
85.2	1.4039	1.9706	1.3969	2.3614	1.6477	1.4708	1.9928	1.7314	1.5796	2.0489	1.7023	1.6562	1.6876	1.6062	0.8392	2.0933	2.3157	1.5088	1.5172	1.3011	1.5106	1.5199	1.4328	2.2029	1.2961	1.552	1.263
85.3	1.5124	1.7609	1.2952	2.5185	1.6668	1.2908	1.8846	1.856	1.7614	1.8514	1.5357	1.7768	1.7091	1.5571	0.9062	2.0033	2.3453	1.5943	1.4541	1.4458	1.4831	1.5044	1.4222	2.1926	1.1918	1.4082	1.1621
85.4	1.4547	1.9387	1.5189	2.5824	1.8678	1.4337	1.8195	2.2524	1.6129	1.8159	1.7806	1.6154	1.6466	1.5736	0.9042	1.8055	2.087	1.9063	1.578	1.3636	1.629	1.5063	1.4448	2.2837	1.1695	1.5522	1.2622
85.5	1.4304	2.1665	1.4097	2.3007	1.6865	1.4197	2.1051	2.1798	1.8223	2.0013	1.8436	1.7092	1.4954	1.6621	0.956	1.829	2.4287	1.7619	1.4596	1.2997	1.5593	1.519	1.4501	2.0946	1.1039	1.6103	1.3552
85.6	1.4278	2.1479	1.4941	2.6111	1.8554	1.515	2.2942	2.1626	1.9122	1.8684	1.5837	1.8552	1.3779	1.6245	1.0987	2.1307	2.1948	1.7668	1.5429	1.4828	1.6143	1.4406	1.5526	2.202	1.1074	1.4314	1.2672
85.7	1.3032	1.916	1.4598	2.3079	1.8772	1.3903	1.987	2.0889	2.0178	1.9415	1.6609	1.7365	1.3876	1.5418	1.1446	1.9091	2.2191	1.7453	1.2062	1.2445	1.6513	1.5283	1.5265	2.0519	1.0394	1.4768	1.3111
85.8	1.4965	1.7168	1.5664	2.4567	1.7864	1.3362	1.6751	2.076	1.8726	1.959	1.8756	1.9281	1.7023	1.3367	0.9364	1.7992	2.4489	1.7934	1.3349	1.3388	1.8388	1.4958	1.4001	2.0564	1.0624	1.4985	1.1714
85.9	1.3899	1.9648	1.546	2.4242	1.7994	1.3223	1.8606	2.0838	1.7559	1.9176	1.7787	1.9651	1.7172	1.4282	0.9953	2.0851	2.3901	1.8589	1.423	1.2527	1.905	1.5569	1.3684	2.3097	1.0276	1.5285	1.1466
86	1.5361	1.9317	1.4672	2.2097	1.6261	1.4584	2.0509	2.2642	1.7268	1.8375	1.7421	2.0233	1.5814	1.4782	1.0582	2.0389	2.293	1.7488	1.2584	1.5239	1.9129	1.5374	1.3215	2.2291	1.0508	1.3472	1.2608
86.1	1.5733	1.7771	1.4814	2.3617	1.6045	1.209	1.6645	2.2812	1.6097	2.1758	1.6294	1.7905	1.7031	1.4915	0.9288	2.0284	1.9875	2.0408	1.3865	1.4327	1.5357	1.9139	1.3113	2.2007	0.9957	1.5438	1.2954
86.2	1.5058	1.7988	1.5363	2.3763	1.682	1.3606	2.0549	2.1969	1.8374	2.0967	1.6002	1.68	1.7213	1.485	0.9768	1.9687	2.1644	1.9456	1.5087	1.2141	1.8574	1.684	1.4412	2.2909	1.0547	1.4661	1.173
86.3	1.617	1.906	1.4059	2.279	1.6975	1.3609	1.8713	2.0925	1.5856	1.9422	1.4806	1.8316	1.5855	1.3697	0.8882	2.0584	2.215	1.8519	1.5248	1.4573	1.6618	1.6282	1.4621	2.2811	1.1511	1.4939	1.0922
86.4	1.6076	2.0289	1.6384	2.3575	1.5586	1.3991	2.0998	2.0042	1.9907	1.9764	1.6393	1.7491	1.8949	1.5483	0.9733	2.2275	2.3861	1.8993	1.1538	1.4983	1.6306	1.5479	1.6337	2.3629	1.0986	1.603	1.2108
86.5	1.7342	2.1146	1.4984	2.6984	1.7713	1.4461	2.151	1.9834	1.7397	1.9377	1.5704	1.7268	1.9692	1.5035	0.9987	2.1374	2.3266	1.8649	1.284	1.4862	1.8031	1.8772	1.4129	2.0737	1.1476	1.6422	1.1971
86.6	1.4932	1.9547	1.5629	2.426	1.7671	1.4557	2.2239	1.9529	1.8788	2.0598	1.6351	1.7587	1.6764	1.6297	0.8999	2.1077	2.1412	1.8239	1.1471	1.244	1.9217	1.5127	1.4723	2.2451	1.0982	1.4853	1.1172
86.7	1.512	2.4017	1.5181	2.4739	1.7455	1.5808	2.1564	1.9932	1.9442	2.0133	1.62	1.7741	1.8285	1.6084	0.8349	2.1498	2.0898	1.7572	1.1701	1.5781	2.0492	1.5604	1.39	2.1761	1.0268	1.5161	1.236
86.8	1.5464	1.7873	1.6637	2.4519	1.806	1.5627	2.3218	1.9153	1.9313	1.9163	1.7483	1.7452	1.5508	1.5439	1.0169	2.3706	1.9379	1.8843	1.3823	1.415	2.228	1.482	1.5136	2.1579	0.9348	1.7223	1.0844
86.9	1.6412	1.6909	1.5947	2.4179	1.7022	1.5452	2.2328	2.1782	1.815	1.9391	1.4685	1.7291	1.4711	1.6273	0.9898	2.1999	1.8384	2.0368	0.9796	1.3067	1.994	1.4341	1.3761	2.0647	1.139	1.4313	1.2015
87	1.6029	2.1475	1.6417	2.4935	1.754	1.3643	2.0086	1.8158	1.7312	1.8738	1.5255	1.7118	1.6433	1.5056	1.0434	2.1136	1.9007	2.0011	1.1762	1.4523	2.2394	1.5529	1.4622	2.0032	1.1917	1.6871	1.2122
87.1	1.6078	1.8571	1.6739	2.5464	1.6912	1.7505	1.8884	2.1192	1.6768	1.9027	1.6534	1.7086	1.5073	1.578	0.8228	2.066	2.2086	2.1097	1.253	1.4175	2.3718	1.5804	1.5279	1.9424	0.9259	1.7446	1.3789
87.2	1.5466	1.7719	1.4502	2.438	1.773	1.5514	1.9546	1.9568	1.6111	1.8717	1.6062	1.6758	1.5766	1.4463	0.9874	2.161	2.0861	1.8537	1.2806	1.4012	2.4167	1.6991	1.52	2.1051	1.2217	1.6995	1.0441
87.3	1.6596	1.7648	1.4662	2.6461	1.6475	1.4988	1.9726	2.0629	1.6854	1.94	1.7319	1.7439	1.538	1.6324	0.8571	2.0583	2.3559	1.7798	1.5606	1.4057	2.2075	1.7931	1.3429	2.131	1.0318	1.7345	1.214
87.4	1.6175	1.7608	1.557	2.5458	1.6417	1.4159	1.9757	2.2566	1.5571	2.1039	1.76	1.9474	1.4135	1.4307	0.9535	2.0478	2.3732	1.9294	1.4899	1.3652	2.1996	1.5583	1.5343	2.0861	1.169	2.1031	1.1166
87.5	1.6506	1.7697	1.5849	2.4851	1.6823	1.7186	1.9224	2.087	1.7229	2.0843	1.4519	1.7326	1.6456	1.6937	0.761	2.0307	2.3226	2.1215	1.4085	1.2428	2.2368	1.636	1.3706	2.0669	1.0564	1.7211	1.2796
87.6	1.7141	1.6194	1.5853	2.5174	1.7493	1.6967	2.1266	2.094	1.7294	2.0407	1.4332	1.8188	1.9607	1.5166	1.0315	1.8369	2.2504	1.8737	1.1117	1.356	2.2037	1.7674	1.5379	2.0995	1.0172	2.0581	1.4787
87.7	1.5396	1.8803	1.6073	2.4357	1.6955	1.8991	1.8592	2.2106	1.5091	2.1275	1.4711	1.8825	1.4768	1.675	0.8411	2.1561	2.1665	1.7926	1.4697	1.3322	2.113	1.7238	1.4855	2.2516	0.9486	2.4752	1.2194
87.8	1.5861	1.7952	1.5947	2.2562	1.8025	1.605	2.4457	2.2596	1.8968	2.0771	1.4463	1.8165	1.7617	1.7416	0.8402	2.2486	1.9845	1.9067	1.3972	1.2769	2.2325	2.1473	1.4216	2.0269	0.9145	1.7328	1.218
87.9	1.3875	1.9595	1.4857	2.416	1.7256	1.8695	2.1709	2.0322	1.5672	1.901	1.4239	1.8349	1.5366	1.5477	0.9553	2.2095	1.9406	1.8208	1.5992	1.2585	2.1037	1.8412	1.4447	1.9971	0.9655	1.8775	1.355
88	1.6734	1.9185	1.7458	2.4398	1.9492	1.6764	1.8508	2.1237	1.8069	2.1169	1.3763	1.779	1.5239	1.4931	0.7869	2.1475	2.1801	1.7024	1.2755	1.2734	2.0604	1.6837	1.4869	2.1126	1.019	1.6483	1.0735
88.1	1.4894	2.1685	1.6397	2.4966	1.8268	1.5689	1.8438	2.0653	1.413	2.1654	1.3435	1.8678	1.7489	1.4558	0.863	2.4694	2.098	1.8442	1.4932	1.3534	1.7506	1.6278	1.4783	1.9104	1.2915	1.7982	1.2839
88.2	1.6638	2.1208	1.6261	2.9609	1.8608	1.8946	1.8464	1.9462	1.2369	2.1687	1.6405	1.8605	1.7985	1.5545	1.0805	2.3145	2.2197	1.8515	1.4938	1.5518	1.8285	1.9325	1.597	2.1104	1.2558	1.8363	1.0764
88.3	1.5428	2.3893	1.664	2.643	1.7887	1.4419	2.109	1.845	1.3352	1.9936	1.6404	1.6679	1.5675	1.5094	0.9237	2.0547	2.1882	1.7773	1.3461	1.193	2.2333	1.8263	1.6211	1.8899	1.1271	1.6938	1.2452
88.4	1.6998	2.0527	1.7555	2.8788	1.7769	1.7304	1.6387	1.8241	1.6182	1.9606	1.3318	1.457	1.4299	1.4647	0.9325	2.1433	2.2583	1.8217	1.6818	1.4149	2.147	1.6833	1.7506	2.051	1.1353	1.8083	1.282
88.5	1.5334	2.0444	1.5806	2.8993	1.892	1.7109	1.893	1.9432	1.3854	1.9325	1.4195	1.6068	1.7273	1.5798	0.9323	2.2023	2.4144	1.8042	1.6015	1.3012	1.7934	1.5954	1.6505	2.0816	1.089	2.0167	1.1348
88.6	1.7182	2.1577	1.5613	2.907	1.9851	1.5098	2.0798	1.9664	1.4249	1.9114	1.4148	1.6319	1.6274	1.3446	0.8424	2.1833	2.4141	1.6825	1.6097	1.2776	2.2257	1.754	1.7046	1.9577	1.2167	1.6769	1.2587
88.7	2.0006	1.8392	1.5272	2.8336	1.7699	1.7071	2.2275	1.9215	1.5064	1.9654	1.5252	1.7206	1.5312	1.6077	0.9695	1.9743	2.1039	1.938	1.5931	1.3158	2.2521	1.8507	1.6185	2.2428	1.1811	1.7186	1.1847
88.8	1.697	2.1726	1.5223	2.5637	1.9636	1.5631	2.1002	2.0406	1.3445	2.1137	1.3517	1.6628	1.5232	1.4197	1.0538	1.9508	2.4079	1.7821	1.4114	1.3507	2.2784	2.0276	1.8482	2.0633	0.9581	1.4548	1.4061
88.9	1.6412	1.9492	1.6717	2.5727	2.0446	1.7573	2.1462	2.2755	1.4495	2.1173	1.3412	1.8836	1.5626	1.4403	1.0131	1.9881	2.302	1.8662	1.7341	1.2304	2.3367	1.9927	1.8648	2.2775	0.848	1.7387	1.5982
89	1.5751	1.7338	1.527	2.6474	1.8624	1.7869	1.9163	2.016	1.4669	2.2433	1.2926	1.6756	1.4578	1.3644	0.9038	1.9472	2.2445	1.7204	1.5631	1.2298	2.045	1.6466	1.9526	1.9893	1.0474	1.7285	1.3507
89.1	1.6132	1.9188	1.7073	2.5502	1.8893	1.8433	1.9239	2.4129	1.765	2.2238	1.2773	1.8944	1.1428	1.3558	0.8143	2.0465	2.3193	1.6413	1.4724	1.3035	2.0356	1.8761	1.8835	2.1395	1.0677	1.4469	1.4367
89.2	1.5102	1.8856	1.6049	2.5966	1.8771	1.6711	2.2757	1.8458	1.63	2.2219	1.1534	1.6812	1.2873	1.5583	0.9034	1.9207	2.1027	1.7919	1.5453	1.3134	2.1044	1.6353	1.4989	1.9965	1.0477	1.6149	1.3805
89.3	1.822	1.847	1.6269	2.8496	1.7929	1.4992	2.1392	1.8285	1.7792	2.0687	1.198	1.862	1.6772	1.3852	0.8931	2.0917	2.0255	2.1519	1.4408	1.284	2.2431	1.4795	1.5255	2.1286	1.0635	1.4636	1.3639
89.4	1.5698	1.9661	1.6216	2.8079	1.8681	1.8753	2.0603	1.8144	1.7372	2.0813	1.322	1.6522	1.6859	1.3415	0.794	2.0328	2.0059	1.8622	1.6102	1.349	2.1868	1.394	1.5848	2.248	1.0566	1.5288	1.4985
89.5	1.6194	1.7659	1.5347	2.3569	1.7959	1.5162	1.8826	2.1674	1.7538	1.993	1.5659	1.7101	1.5847	1.2515	0.7327	1.968	1.9449	1.8888	1.4368	1.3567	2.0359	1.4508	1.416	2.1353	1.0684	1.5471	1.5325
89.6	1.5368	2.2158	1.5969	2.2598	1.6172	1.5606	1.892	2.2512	1.7542	2.064	1.4211	1.3005	1.7017	1.3822	0.9315	2.1479	2.0647	2.1361	1.6935	1.1932	1.7826	1.3982	1.5007	2.1845	1.3064	1.4634	1.2318
89.7	1.6146	2.3195	1.8415	2.5536	1.6332	1.8209	2.0727	2.759	1.611	2.0453	1.2046	1.5837	1.6193	1.3795	0.8691	2.2766	2.1138	1.9994	1.2889	1.4987	2.022	1.6136	1.4929	2.4539	1.261	1.3807	1.28
89.8	1.6189	1.9969	1.6904	2.5952	1.5701	1.8356	2.071	2.4843	1.8092	1.932	1.3482	1.3342	1.7681	1.46	0.7226	2.4065	2.2024	2.0296	1.276	1.3191	2.0844	1.4658	1.4164	2.3845	1.3477	1.3732	1.416
89.9	1.618	1.9785	1.6093	2.425	1.4948	1.7419	1.8161	2.5157	1.5629	1.9909	1.2862	1.4302	1.6209	1.453	0.9256	2.2655	2.1491	2.1739	1.3592	1.2321	2.2175	1.3849	1.5729	2.5513	1.338	1.5723	1.3916
90	1.4619	2.1151	1.693	2.3417	1.5954	1.5697	1.8326	2.3324	1.5459	2.0402	1.3183	1.4244	1.5869	1.4131	1.038	2.2541	2.1317	2.0884	1.4666	1.428	1.7717	1.3675	1.5313	2.4691	1.1594	1.5877	1.0402
90.1	1.6357	2.2133	1.5908	2.2586	1.6448	1.4365	2.2135	2.3136	1.523	2.1409	1.3379	1.525	1.4427	1.2296	0.983	2.0022	2.2324	2.1019	1.3636	1.2927	1.8647	1.3934	1.7106	2.3729	1.3493	1.5152	1.4566
90.2	1.723	1.9054	1.6426	2.2608	1.5951	1.5548	2.0698	2.3246	1.5354	2.0995	1.3573	1.6476	1.495	1.425	0.8898	2.0549	2.1247	1.7908	1.2449	1.4745	2.2578	1.3813	1.8625	2.3012	1.3891	1.7915	1.1096
90.3	1.6419	2.0668	1.5111	2.5187	1.6709	1.3117	2.0905	2.1756	1.6439	2.1036	1.1599	1.5582	1.4682	1.3541	0.9297	1.9529	2.3499	1.9377	1.0726	1.3466	2.1116	1.312	1.707	2.1652	1.1624	1.4368	1.1699
90.4	1.8758	1.9197	1.6112	2.4738	1.6344	1.7147	1.968	2.1008	1.59	2.1588	1.4118	1.4508	1.5416	1.3909	0.8716	1.8884	2.2919	2.016	1.1681	1.2335	2.2178	1.3739	1.5516	2.1402	1.2048	1.5898	1.2181
90.5	1.8454	1.8414	1.4213	2.4496	1.9058	1.4676	1.7511	1.9126	1.7052	1.9122	1.3031	1.452	1.5563	1.3607	0.9132	2.0218	2.1936	1.9753	1.4472	1.3101	2.3883	1.3376	1.5304	2.229	1.3549	1.8818	1.1524
90.6	1.607	1.9124	1.6861	2.5331	1.7008	1.4381	1.8555	1.9256	1.7474	1.9345	1.3335	1.4414	1.5131	1.239	0.8379	1.8661	2.3708	1.8394	1.3487	1.3879	2.2231	1.4291	1.4883	2.423	1.2235	1.87	1.1132
90.7	1.5704	1.8624	1.6721	2.5566	2.0366	1.533	1.705	2.1028	1.8044	1.9569	1.6293	1.6346	1.5397	1.4758	0.8633	1.7597	2.47	1.8527	1.1758	1.4624	2.1242	1.5034	1.5795	2.437	1.3731	1.7871	1.1785
90.8	1.6023	1.8502	1.5206	2.7088	1.8782	1.7634	2.0708	1.7927	1.8031	2.012	1.3459	1.3962	1.293	1.307	0.9547	1.8849	2.8445	1.9147	1.2984	1.47	2.0097	1.5327	1.5624	2.3667	1.2581	1.61	1.079
90.9	1.5551	1.8958	1.58	2.8243	1.948	1.9406	1.9725	2.0339	1.7986	1.9543	1.4009	1.3434	1.3964	1.4433	1.0201	1.9227	2.6588	1.8139	1.2199	1.4509	1.8246	1.4427	1.531	2.2451	1.2433	1.5492	1.306
91	1.8494	1.8081	1.7073	2.6038	1.8744	1.8013	1.8445	1.8378	1.8076	1.9086	1.5034	1.4797	1.4845	1.3919	0.7387	1.8105	2.6341	1.7664	1.1186	1.3775	1.9914	1.5798	1.6193	2.3561	1.1782	1.501	1.2207
91.1	1.8996	2.1061	1.7548	2.6884	1.9097	1.8751	2.2197	1.4987	1.7068	1.8949	1.4261	1.5431	1.5021	1.1253	0.9267	1.9456	2.7776	1.7576	0.9994	1.3904	2.1621	1.6791	1.6266	2.0243	1.25	1.4518	1.0198
91.2	1.9786	1.6	1.664	2.8506	1.7309	1.8486	1.9975	1.788	1.7659	2.2206	1.4733	1.2737	1.2698	1.3146	0.8994	1.8089	2.4627	1.865	1.0948	1.4725	1.9549	1.6071	1.5788	2.446	1.2606	1.3754	1.1644
91.3	2.0915	1.7053	1.6451	2.7301	1.7645	2.1163	2.0805	1.911	1.9182	2.054	1.6053	1.2516	1.5686	1.3556	0.8018	2.1169	2.7887	1.8842	1.4119	1.3204	2.1606	1.6389	1.7081	2.2318	1.3487	1.5572	1.0121
91.4	2.0527	1.7203	1.6688	2.7936	1.7391	1.8736	2.0294	1.665	1.7817	2.1357	1.6384	1.4123	1.3909	1.3888	0.692	1.8487	2.5214	1.8587	1.3844	1.2362	2.1906	1.5564	1.4255	2.317	1.1424	1.8065	1.0516
91.5	1.8251	1.6982	2.0872	2.7149	1.7109	1.8147	2.1022	1.5383	1.7866	2.1608	1.6329	1.3726	1.4411	1.5072	0.8736	1.8279	2.3837	2.0277	1.4836	1.3796	2.0997	1.7691	1.5749	2.1949	1.2236	1.5492	1.068
91.6	1.8511	1.7666	1.6258	3.0747	1.6821	1.8573	2.164	1.9874	1.6509	2.06	1.5264	1.3119	1.3624	1.4163	0.7303	1.9238	2.2721	1.7606	1.3466	1.2874	1.6355	1.4629	1.5779	2.254	1.576	1.5827	1.0925
91.7	1.7791	1.9467	1.5446	2.9669	1.8005	1.8648	2.0692	1.826	1.7513	2.2755	1.5859	1.2478	1.4099	1.4449	0.7454	2.1389	2.4028	1.9433	1.396	1.3147	1.8979	1.8171	1.5392	2.207	1.3118	1.6763	1.1178
91.8	1.7465	1.6197	1.7005	2.7741	1.7349	1.7383	1.9059	1.8129	1.7868	2.1151	1.6149	1.2991	1.5885	1.3846	0.9223	1.9921	2.1717	2.0043	1.3435	1.4193	2.0646	1.5093	1.5686	2.19	1.1938	1.2656	1.092
91.9	1.7587	1.6749	1.7713	2.8511	1.8115	1.5791	2.0457	1.4547	1.6946	2.2146	1.4198	1.38	1.2582	1.4317	0.8382	1.9357	2.2208	1.9564	1.2575	1.3887	2.0394	1.8154	1.4254	2.2319	1.0893	1.5834	1.1448
92	1.7863	1.4754	1.6078	2.8358	1.8551	1.8689	1.9409	1.5654	1.6916	2.1221	1.5002	1.5242	1.134	1.3752	0.8628	1.7454	2.1532	1.9539	1.3159	1.3123	2.0751	1.5479	1.5349	2.5602	1.1383	1.7027	1.1207
92.1	1.7018	1.8213	1.7597	2.6458	1.7298	1.3596	2.2041	1.5472	1.8004	2.2225	1.5386	1.4651	1.1935	1.4218	0.9701	1.8622	2.0608	2.1446	1.362	1.2089	2.1064	1.6359	1.5308	2.2189	1.2269	1.6464	0.9649
92.2	1.816	1.5873	1.6569	2.4249	1.7745	1.4615	2.1346	1.6909	1.7074	1.9731	1.5883	1.4269	1.1954	1.4378	0.8182	1.79	2.1703	2.1379	1.1544	1.4139	2.3076	1.8168	1.7564	2.3298	0.9434	1.3075	1.3386
92.3	1.9047	1.7846	1.6399	2.5412	1.6902	1.5009	2.1682	1.4561	1.7073	2.1623	1.5299	1.3607	1.2075	1.5133	0.8636	1.8081	2.2634	2.0393	1.3449	1.3385	2.2868	1.6641	1.8017	2.2646	1.0351	1.4389	1.0919
92.4	1.708	1.6532	1.8329	2.401	1.9124	1.4905	2.2747	1.4677	1.8734	1.9522	1.4581	1.3454	1.3591	1.5019	0.9542	1.9028	2.0913	2.073	1.4152	1.4588	2.3764	1.88	1.6962	2.1734	1.1214	1.5526	1.2648
92.5	1.8451	2.0306	1.5044	2.6364	1.9578	1.5248	2.0372	1.4629	1.6258	2.1072	1.496	1.1096	1.3882	1.4053	0.8974	1.8987	2.0214	2.1815	1.3416	1.3667	2.078	1.9512	1.8272	2.0977	1.1535	1.6663	1.0902
92.6	1.6371	2.2246	1.6067	2.3247	1.8857	1.5557	2.2525	1.4249	1.6488	2.1482	1.523	1.4304	1.2849	1.5759	0.7742	1.9488	2.1087	1.9455	1.374	1.4823	2.2506	1.8054	1.7487	2.164	0.9434	1.5114	1.2304
92.7	1.8458	2.0651	1.7868	2.3893	1.9054	1.2683	2.0364	1.1964	1.6554	2.2941	1.4632	1.4281	1.2046	1.5469	0.7845	1.8341	2.2496	1.9563	1.4019	1.5781	1.8865	1.706	1.8852	2.1861	0.9253	1.5241	1.1886
92.8	1.6338	1.7114	1.7153	2.4136	1.8765	1.4223	1.7712	1.3634	1.6092	2.1452	1.4233	1.5149	1.4509	1.6166	0.7619	1.8234	2.4821	1.9347	1.2876	1.4706	2.3659	1.6304	2.0175	2.2181	1.104	1.3393	0.9512
92.9	1.5692	2.2482	1.8533	2.6353	1.9949	1.4648	1.96	1.427	1.8134	1.9112	1.5459	1.3744	1.4844	1.5632	0.8848	1.8328	2.2685	2.0905	1.2742	1.3153	2.2842	1.6612	1.8358	2.0166	0.887	1.4279	1.0245
93	1.5849	1.6286	1.6909	2.3223	1.848	1.5218	1.8823	1.5016	1.6996	1.9608	1.6962	1.517	1.5251	1.7686	0.9395	2.0335	2.0874	2.1173	1.3561	1.3778	2.2987	1.7154	1.8411	2.051	1.0102	1.5376	1.1525
93.1	1.8327	1.6479	1.687	2.1995	1.8448	1.2913	1.8473	1.5741	1.7553	2.184	1.4322	1.3361	1.7455	1.4715	0.8087	1.9677	2.1634	2.2912	1.3526	1.2962	2.1831	1.6201	2.0584	2.1441	0.945	1.5542	1.0801
93.2	1.5603	1.725	1.8066	2.4439	1.6761	1.4072	1.8866	1.6246	1.8854	2.2054	1.3881	1.4518	1.8356	1.4735	0.7871	1.9584	2.1685	2.1154	1.4973	1.3635	2.2133	1.6968	1.7343	2.3225	1.1061	1.6436	1.1033
93.3	1.6701	1.7178	1.7349	2.5248	1.8106	1.5229	1.8501	1.5287	1.6762	2.2249	1.4969	1.489	1.7712	1.2965	0.8537	2.0545	2.0618	1.9298	1.5997	1.3277	2.2473	1.6068	1.8953	2.0825	1.2139	1.6222	0.9834
93.4	1.6504	1.6632	1.8879	2.357	1.761	1.2193	1.9138	1.5024	1.8203	2.2116	1.5816	1.4771	1.5845	1.4719	0.7351	1.8241	2.0966	2.1858	1.2797	1.3086	2.1055	1.6736	2.0126	2.1227	0.9768	1.4927	1.1907
93.5	1.4252	1.8403	1.7836	2.4557	1.9623	1.3752	1.9803	1.3657	1.7038	2.4547	1.6624	1.5806	1.5356	1.47	0.8397	1.7973	2.3397	2.1516	1.5275	1.2169	2.1354	1.804	2.0185	2.3653	0.9889	1.4041	0.9486
93.6	1.6954	1.9715	1.648	2.568	1.8623	1.5694	2.032	1.304	1.8443	2.3016	1.3632	1.621	1.3672	1.5689	0.7433	1.7404	2.1936	2.2054	1.1456	1.2966	1.9576	1.6271	1.7948	2.3056	0.8401	1.4056	1.2577
93.7	1.5513	1.7299	1.8205	2.3139	1.7578	1.3445	1.9624	1.3449	1.8053	2.4747	1.4737	1.3929	1.2746	1.4159	0.7584	1.797	2.4969	2.153	1.2303	1.2674	1.9939	1.6979	1.6408	2.146	0.7835	1.4233	1.3001
93.8	1.5226	1.5461	1.663	2.4879	1.8489	1.5194	1.9266	1.3926	1.7309	2.3767	1.6651	1.4193	1.3212	1.6446	0.9718	1.6388	2.1811	1.9524	1.3821	1.3693	1.6679	1.6162	1.8967	2.2053	0.871	1.6453	1.3266
93.9	1.6578	1.8547	1.7388	2.3719	1.8973	1.3336	1.9664	1.3076	1.8353	2.4079	1.5348	1.4747	1.3552	1.4003	0.6846	1.7165	2.1801	2.0205	1.208	1.2418	1.9219	1.5429	1.8574	2.1779	0.9969	1.5621	1.1886
94	1.6245	1.7324	1.8056	2.4123	1.8217	1.4438	1.9313	1.1703	1.7702	2.2967	1.5339	1.5572	1.4585	1.3308	0.9573	1.7447	2.2027	1.977	1.321	1.285	1.9272	1.4993	1.825	2.1652	0.8941	1.6461	1.0382
94.1	1.634	1.8337	1.8364	2.3639	1.8947	1.48	2.1205	1.4917	1.6811	2.1209	1.409	1.4835	1.6601	1.5372	0.8494	1.7244	2.5123	2.1258	1.2636	1.2266	1.9137	1.467	1.7115	2.1301	0.7944	1.4326	1.1723
94.2	1.5589	1.7461	1.6629	2.4191	1.9455	1.5425	1.9717	1.4045	1.5838	2.2833	1.4363	1.3824	1.4964	1.4592	0.9792	1.722	2.5498	1.9876	1.0923	1.4347	1.788	1.3982	1.8988	2.0644	0.8301	1.3363	1.1146
94.3	1.5963	1.7595	1.6665	2.5669	1.8889	1.8353	1.8145	1.6247	1.8256	2.0936	1.3578	1.5615	1.5731	1.3791	0.935	1.8819	2.4048	2.1457	1.0743	1.4631	1.9782	1.6291	1.9034	2.0837	0.8718	1.3746	1.2466
94.4	1.693	1.6198	1.6079	2.298	2.0942	1.7538	1.8261	1.6306	1.7712	2.1897	1.2965	1.6215	1.5468	1.6969	0.9214	1.7608	2.379	1.8902	0.995	1.2706	1.9487	1.3195	1.9608	2.1216	1.0612	1.4729	1.2921
94.5	1.5143	1.9145	1.5229	2.5129	2.0052	1.7326	1.8079	1.78	1.6595	2.1363	1.4123	1.5264	1.4204	1.5053	0.7193	1.8067	2.6394	1.9797	1.1721	1.1853	1.8079	1.5864	1.826	2.1126	0.8376	1.4509	1.4496
94.6	1.3716	1.7088	1.6268	2.6669	1.7888	1.4658	1.9233	2.0629	1.7741	2.1155	1.2804	1.5087	1.3453	1.4374	0.8237	1.7613	2.7555	2.0359	1.3379	1.3165	1.7622	1.5469	1.8385	2.0946	0.9032	1.3681	1.4904
94.7	1.4839	1.931	1.6991	2.7381	1.8537	1.685	1.9144	1.5075	1.7514	2.4218	1.2646	1.5251	1.3682	1.438	1.0189	1.9013	2.7159	1.9165	1.2107	1.3295	1.764	1.5126	1.9131	1.9967	0.8256	1.6761	1.3807
94.8	1.4257	1.9401	1.6315	2.6065	2.0503	1.4613	1.948	1.8004	1.8068	2.1023	1.3961	1.5604	1.4445	1.5005	0.9141	1.7706	2.5239	2.028	1.2018	1.3124	1.9601	1.606	1.8524	1.9999	0.9349	1.6845	1.6261
94.9	1.6059	1.8791	1.5486	2.6535	1.9868	1.727	1.9395	1.6607	1.7482	2.2463	1.4043	1.4295	1.5654	1.3515	0.7433	1.9661	2.6261	1.977	1.2761	1.429	2.1751	1.5092	2.0537	2.085	0.8093	1.5172	1.4495
95	1.5287	1.9208	1.6255	2.5461	2.026	1.5525	2.0401	1.7625	1.8151	2.1444	1.3086	1.3953	1.5834	1.4052	0.8665	1.7873	2.5997	1.7413	1.2967	1.3541	1.9426	1.7349	1.7589	2.0423	0.9563	1.4359	1.3473
95.1	1.5633	1.944	1.6832	2.6011	2.0748	1.5766	2.1042	2.0407	1.7783	2.6312	1.3766	1.4577	1.6333	1.4679	0.9254	1.8464	2.2954	1.9587	1.3966	1.348	1.8685	1.6857	1.5737	2.058	0.8169	1.2496	1.0431
95.2	1.569	1.6712	1.7768	2.7648	1.9134	1.7993	2.2369	1.7511	1.8086	2.2101	1.2645	1.4876	1.5174	1.5975	0.8978	1.8908	2.0036	1.7567	1.3735	1.4009	2.2504	1.5504	1.784	2.1928	0.8386	1.4505	1.2297
95.3	1.5324	1.6986	1.6947	2.8925	1.868	1.3574	2.1168	1.783	1.8194	2.1494	1.3109	1.3119	1.4813	1.4642	0.9653	1.9504	2.3508	1.7155	1.3653	1.4173	2.1114	1.3701	1.6359	2.3341	0.8707	1.5723	1.2657
95.4	1.585	1.8453	1.7582	2.863	1.9389	1.2889	2.3029	1.6875	1.621	2.5824	1.2	1.4281	1.312	1.4292	0.9911	1.9606	2.2447	1.8468	1.1969	1.3712	2.2333	1.5512	1.9697	2.3468	0.8237	1.6422	1.7234
95.5	1.5322	1.9176	1.773	2.5577	2.1115	1.5048	2.2697	1.6525	1.6986	2.1487	1.3121	1.4997	1.2085	1.5277	0.9349	2.0244	2.1044	1.8591	1.4111	1.3932	2.0309	1.6279	1.8294	1.9588	0.8915	1.5557	1.4199
95.6	1.3494	1.8579	1.728	2.662	1.9377	1.4145	2.4251	1.9654	1.7158	2.1276	1.2351	1.3425	1.5461	1.3772	0.9512	1.993	2.0813	1.9543	1.2296	1.3386	2.1479	1.6182	1.9833	2.1611	0.8905	1.4435	1.3913
95.7	1.3057	1.9282	1.7019	2.6829	1.9708	1.3412	2.224	1.9239	1.5717	2.1283	1.3905	1.429	1.4893	1.5005	0.8871	2.0336	2.0555	1.835	1.3534	1.2457	1.8527	1.4498	1.8481	2.2177	0.9364	1.5614	1.6363
95.8	1.3993	2.0653	1.7401	2.6496	1.7604	1.4767	2.3945	1.5452	1.7051	2.1278	1.2599	1.5432	1.6327	1.5173	0.9996	1.9089	2.1322	1.8654	1.1749	1.4499	1.8037	1.3446	1.8556	2.1633	1.0618	1.8666	1.5917
95.9	1.4534	2.0104	1.7342	2.6503	1.8262	1.1972	2.014	1.7316	1.8261	2.0544	1.2027	1.459	1.5987	1.4489	1.0792	2.0559	2.3362	1.9376	1.3989	1.3354	2.4267	1.406	2.2598	2.1994	1.1751	2.0668	1.6303
96	1.5858	2.2389	1.7206	2.6988	1.9434	1.535	2.1504	1.7245	1.7982	1.9031	1.3458	1.2775	1.6282	1.4081	0.9086	1.9044	2.6072	1.9893	1.178	1.4178	2.0063	1.2129	2.1516	2.0648	1.1162	1.5465	1.5268
96.1	1.4843	1.7306	1.719	2.7507	1.8013	1.5694	2.4285	1.7253	1.9615	2.1294	1.2878	1.4708	1.7499	1.4755	1.0423	1.851	2.1251	1.9835	1.3511	1.1799	1.7216	1.3015	2.298	2.3031	1.1051	1.6049	1.7696
96.2	1.5519	2.0911	1.6921	2.6565	2.0607	1.7844	2.1248	1.6654	1.88	2.31	1.2542	1.4489	1.6339	1.531	0.962	1.7129	2.6467	1.9387	1.268	1.2322	1.9483	1.3242	2.1942	2.5583	0.8868	1.5061	1.4253
96.3	1.3806	2.3386	1.6202	2.6312	2.1711	1.8302	2.1313	1.8824	1.8567	2.0295	1.4941	1.3896	1.6633	1.3925	1.1127	1.9227	2.6388	1.9384	1.3636	1.1994	1.9025	1.4332	2.3174	2.3468	0.8402	1.5001	1.6148
96.4	1.4979	1.9114	1.6785	2.7738	1.9894	1.8227	2.2961	1.6518	1.9279	2.2669	1.4632	1.4611	1.8292	1.4813	0.9746	1.9166	2.3998	2.1509	1.2348	1.2243	1.8781	1.2384	2.05	2.3608	0.9424	1.3428	1.6373
96.5	1.4957	1.9645	1.6039	2.744	1.8212	1.7181	2.1929	1.8898	1.8269	2.1761	1.3439	1.3876	1.4724	1.4007	0.8942	2.0434	2.2593	2.0259	1.3807	1.5649	1.9432	1.3025	2.2553	2.415	0.9651	1.4791	1.4521
96.6	1.5087	2.0115	1.6981	2.7807	2.0653	1.5721	1.995	1.7702	1.843	2.1573	1.4455	1.3302	1.9401	1.5508	0.9292	1.9352	2.5272	1.9783	1.3358	1.4061	2.0471	1.3076	2.6523	2.7164	0.897	1.5709	1.7688
96.7	1.4204	1.9964	1.6349	2.6378	1.9263	1.8885	2.3201	1.8081	1.6953	2.0754	1.3418	1.4157	1.6775	1.5233	1.0276	1.8504	2.4275	1.9999	1.2068	1.3102	1.9693	1.5525	2.129	2.9703	0.9214	1.4242	1.6748
96.8	1.3528	1.8581	1.6866	2.5185	1.9742	1.9188	2.2952	1.658	1.8003	2.179	1.3121	1.7125	1.8258	1.5316	0.928	1.9235	2.4652	1.9697	1.2769	1.2374	1.9736	1.3867	2.3825	2.7123	0.9391	1.6141	1.5653
96.9	1.5369	2.2109	1.5605	2.4662	1.9008	1.9826	2.0428	1.593	1.7715	2.0632	1.4942	1.7339	1.784	1.4791	1.0254	2.072	2.6451	1.9596	1.1829	1.2108	2.3028	1.4496	2.3587	2.7705	0.9745	1.7344	1.506
97	1.4588	2.0955	1.7028	2.4509	2.0191	1.9784	2.1839	1.711	2.0526	2.234	1.2798	1.8019	1.7216	1.6837	0.9082	2.1017	2.6069	1.7668	1.0964	1.357	2.024	1.3813	1.9918	2.6824	0.9441	1.6847	1.5393
97.1	1.5348	2.2166	1.7009	2.587	1.8994	1.8948	2.0121	1.5253	2.0267	2.2431	1.4776	1.6209	2.0476	1.4877	0.8084	1.8365	2.5113	2.2712	1.075	1.2639	2.0346	1.3603	1.9276	2.7963	0.8413	1.6068	1.9167
97.2	1.6929	2.099	1.6483	2.6557	2.044	1.8266	1.7816	1.7345	1.6033	2.3143	1.6512	1.5575	2.2696	1.4416	0.8639	2.0182	2.8248	2.2644	1.2724	1.3045	2.1166	1.5552	2.349	2.6416	1.0071	1.7137	1.4926
97.3	1.5247	2.2505	1.5806	2.4021	1.877	1.7636	1.7953	2.0312	1.8348	2.2763	1.6211	1.4323	2.1117	1.4854	0.9231	2.0163	2.4091	1.8262	1.0596	1.2613	2.103	1.6728	2.1492	2.9854	0.9972	1.5915	1.5601
97.4	1.3996	2.0252	1.6093	2.5584	1.9785	1.8361	2.126	1.8341	1.8651	2.2195	1.8215	1.5846	1.7499	1.4911	0.7784	1.8461	2.3803	2.0047	1.1484	1.417	2.0365	1.4208	2.2392	2.7272	0.8817	1.748	1.6326
97.5	1.5571	2.0933	1.4406	2.557	1.8901	1.6504	2.5115	1.8653	1.8915	2.1599	1.5157	1.6337	1.6404	1.5632	0.8909	2.052	2.2066	2.0105	1.3229	1.3274	2.1285	1.4666	2.212	2.7447	0.837	1.8329	2.1267
97.6	1.5176	2.0817	1.7637	2.6453	1.8183	1.705	2.2638	2.0474	1.9185	2.6368	1.5807	1.6692	1.7887	1.5076	0.8619	1.8968	2.7597	2.199	1.2134	1.0465	1.8406	1.5174	2.2653	2.8243	0.9979	1.7669	1.6205
97.7	1.3134	1.9795	1.6337	2.6573	1.8285	1.4456	2.1056	1.8563	1.8157	2.3052	1.5874	1.9962	1.8293	1.6307	0.9491	2.0396	2.6937	1.8125	1.2465	1.2759	2.1193	1.6706	1.9955	2.7347	0.9781	2.3772	1.6275
97.8	1.2865	1.7521	1.5412	2.634	1.8557	1.438	1.9448	1.9093	1.929	2.3748	1.4237	1.9741	1.9713	1.5496	0.8831	2.0002	2.4539	1.8737	1.0846	1.2515	2.1781	1.6546	2.0603	2.9782	0.9779	1.8377	1.558
97.9	1.2984	1.9425	1.7583	2.5336	1.8012	1.7582	2.3016	2.0313	1.8899	2.2453	1.4806	1.9261	1.8148	1.4406	1.023	2.0001	2.509	2.1135	1.0912	1.5058	2.2092	1.512	1.8929	3.2241	0.9598	1.7563	1.672
98	1.2903	2.166	1.6659	2.6063	1.6885	1.3876	2.484	2.0588	1.8847	2.2285	1.4239	1.9372	1.5878	1.4468	0.9869	2.0046	2.403	2.1004	1.1549	1.501	2.2971	1.6117	1.9404	3.0066	0.9119	1.4146	1.6949
98.1	1.378	1.8464	1.7728	2.5519	1.7922	1.5651	2.1984	1.9136	1.8267	2.062	1.5383	1.8076	1.731	1.5654	1.0096	1.8645	2.1004	1.9658	1.3402	1.1431	2.0889	1.8214	2.1563	2.8148	0.9322	1.5387	1.3157
98.2	1.5669	1.9617	1.6666	2.4679	1.8413	1.6417	2.1906	2.2064	1.8932	2.2713	1.348	1.6899	1.7983	1.6943	1.0493	1.9577	1.9417	2.0811	1.1811	1.3408	1.9455	1.6571	1.9154	2.8547	1.0861	1.4808	1.5504
98.3	1.3699	2.0044	1.6614	2.5958	1.9027	1.5763	1.9379	2.007	1.8452	2.0537	1.3607	1.7328	1.9434	1.424	1.0136	1.9305	2.3622	2.0489	1.2103	1.3141	1.901	1.2655	1.7191	2.9248	0.8914	1.3371	1.3227
98.4	1.3047	2.0855	1.7377	2.675	2.1934	1.7701	1.9453	1.9398	1.8167	2.095	1.592	1.8415	1.873	1.3705	1.1226	2.0051	2.2966	1.8778	1.1542	1.2099	2.0384	1.6208	1.8613	2.7358	0.9589	1.4469	1.3056
98.5	1.2945	1.8348	1.8994	2.6628	1.9186	1.6892	2.1857	2.04	1.8752	2.025	1.5142	1.7231	1.8905	1.5095	1.0537	2.005	2.3443	1.9018	1.2238	1.2299	2.0547	1.5137	1.8775	2.7753	1.1763	1.3346	1.4218
98.6	1.5787	1.9739	1.5275	2.686	1.9855	1.7076	2.0448	1.8415	1.9442	2.0386	1.48	1.8104	2.1197	1.7212	0.9766	1.9247	2.3511	2.016	1.3927	1.317	1.7157	1.4705	1.9515	2.9617	1.0421	1.5714	1.4846
98.7	1.5542	2.1019	1.4006	2.4931	1.8828	1.6066	2.0971	1.9719	2.0045	2.0995	1.5482	1.7579	2.236	1.5836	1.0182	1.9511	2.4754	1.9816	1.2967	1.3161	1.7291	1.6793	2.1056	2.7074	0.9326	1.3732	1.478
98.8	1.6644	1.9709	1.4421	2.4984	1.9392	1.7177	1.9728	2.0204	1.7232	1.9984	1.3994	1.817	2.1486	1.5961	0.9633	1.8138	2.6017	1.9454	1.2097	1.2373	1.8868	1.6131	1.8551	2.6431	0.8866	1.4821	1.7073
98.9	1.7873	1.941	1.4514	2.5519	1.9472	1.6571	2.0789	2.1186	1.7681	2.0958	1.5863	1.9737	2.5105	1.5708	0.9504	2.007	2.5446	1.7836	1.2543	1.4371	1.8511	1.5408	2.0232	2.842	0.994	1.3875	1.4528
99	1.6205	2.0032	1.5505	2.4859	1.8307	1.3389	2.1964	1.9207	1.7612	2.0648	1.3705	1.9639	2.0658	1.5882	0.9604	1.941	2.2454	1.917	1.2883	1.2785	2.1547	1.6302	1.9215	2.9537	0.8398	1.6024	1.5523
99.1	1.5333	2.2104	1.6753	2.5224	1.9177	1.2548	1.9592	2	2.0288	2.057	1.5066	2.0646	2.2043	1.4485	0.8483	1.926	1.8679	1.9142	1.3267	1.3202	2.1108	1.8576	1.7562	2.8805	0.8128	1.5959	1.8809
99.2	1.478	1.8968	1.6083	2.5322	1.8666	1.2143	1.8429	2.0694	2.0757	2.1472	1.4728	1.9053	2.1617	1.5844	0.8065	1.8016	1.9424	1.8534	1.2442	1.2065	1.7568	2.1286	2.144	2.9372	1.0145	1.6766	2.2671
99.3	1.5974	2.0027	1.5949	2.5415	1.9643	1.3971	1.8911	2.1402	1.9274	2.1402	1.4596	1.9111	2.2312	1.4393	0.8736	1.8376	1.5332	1.9639	1.428	1.2831	1.3029	1.8967	2.0654	2.7691	0.8587	1.4924	1.9484
99.4	1.4339	1.845	1.5577	2.5573	1.7234	1.5272	1.7704	2.0655	2.0587	2.2018	1.5387	1.8191	2.4	1.4861	0.8988	1.7864	2.0559	2.052	1.4134	1.2372	1.3764	2.0054	2.1826	2.7261	1.0435	1.5782	1.8679
99.5	1.371	2.0146	1.784	2.5588	1.8492	1.6039	2.2608	1.943	1.8073	2.0136	1.4135	1.7303	2.1861	1.4273	1.0026	1.975	1.7643	2.0568	1.5444	1.2917	1.6604	1.8014	2.1454	2.7761	0.7868	1.5549	1.7968
99.6	1.4701	1.8949	1.6451	2.7509	1.8555	1.5866	2.1001	2.0787	2.17	2.0866	1.4978	1.7657	2.2888	1.3039	0.8173	2.0205	2.0905	1.9154	1.2474	1.3336	2.1304	1.5001	1.892	2.8176	0.9033	1.7539	2.175
99.7	1.571	2.1417	1.4877	2.5665	1.8014	1.6465	2.0301	2.0455	1.885	2.11	1.4165	1.736	2.4767	1.3785	0.8985	2.0576	2.5601	2.2302	1.3102	1.3009	2.3983	1.4815	2.009	2.9674	0.9002	1.2141	1.7079
99.8	1.3968	1.8588	1.5288	2.5654	1.5112	1.668	1.9286	2.0105	1.9086	2.0811	1.3986	1.6816	2.3565	1.3481	1.019	1.9335	2.6696	1.922	1.379	1.1494	2.3585	1.5595	2.0332	2.8567	0.8264	1.4687	1.4613
99.9	1.3085	1.5971	1.5942	2.3861	1.563	1.4463	1.9254	1.8833	1.9997	2.2537	1.595	1.588	2.0933	1.543	0.9804	1.884	2.6553	1.9186	1.4049	1.4358	1.9248	1.6329	2.0302	2.7396	1.1622	1.8215	1.6412
100	1.4628	1.9653	1.4085	2.6847	1.5234	1.739	1.9087	2.0503	2.0247	2.381	1.4905	1.7389	2.1341	1.3941	0.9191	2.0922	2.3937	2.0123	1.4546	1.3031	2.0873	1.365	1.9086	2.9406	0.9702	1.6391	1.9908
	REPLICA 2; RMSD VALUES ARE GIVEN IN ANGSTROM
Time, [ns]	0G0	C5P	0FT	U2S	UM3	C2P	PUA	139	UA3	ATR	A3P	PAP	U1S	PAX	ADP	U3P	0EY	U2P	TXS	AMP	C3P	UMF
0.1	1.0828	1.5329	1.1066	1.1552	1.0577	1.7357	1.9055	1.7825	2.0282	2.2547	1.5743	1.7853	2.2037	1.4464	1.1053	1.958	2.0893	2.0178	1.0973	1.2565	2.3784	1.6413	1.8067	2.6374	0.9587	1.7505	1.3024
0.2	0.9957	1.4616	0.8634	1.4182	1.1313	2.0181	1.9737	2.0059	2.1392	2.334	1.7708	1.7719	2.3771	1.5973	0.8568	1.8244	2.471	2.0641	1.2142	1.3295	2.4461	1.7135	1.9843	2.9391	0.94	1.8185	1.5001
0.3	1.2294	1.4146	0.8877	1.1969	1.1517	1.857	1.8303	1.8623	1.9362	2.1142	1.8298	1.6254	2.2619	1.5074	0.8261	1.8683	2.4708	2.214	1.168	1.4254	2.0727	1.5995	2.0688	2.8457	0.8888	1.7359	1.6923
0.4	0.9024	1.3478	0.9505	1.3107	1.0983	1.863	1.9164	2.0872	1.9265	2.1782	1.7555	1.5533	2.217	1.5173	0.9694	1.898	2.5011	2.0123	0.9929	1.5266	2.3688	1.5022	1.8565	2.7964	1.04	1.9684	1.5853
0.5	0.9643	1.1703	0.8926	1.0899	0.9587	1.9855	1.9019	1.8347	1.8805	2.0747	1.7915	1.6356	2.3404	1.5001	0.9911	2.0809	2.5726	1.9472	1.032	1.3967	2.6524	1.5662	1.9199	2.9029	0.8627	1.9206	1.4793
0.6	1.0397	1.2773	1.0212	1.2621	0.6944	1.8227	2.0209	1.9473	1.9365	2.1605	1.5507	1.7582	1.6178	1.3992	1.0843	2.0091	2.6619	1.8328	1.2525	1.2065	2.451	1.6381	1.9371	2.9051	0.9774	2.2538	1.5781
0.7	0.8813	1.2844	1.1208	1.4005	0.7045	1.5189	2.0112	1.9097	1.6947	1.9792	1.5182	1.7252	1.4304	1.3517	1.0868	1.9576	3.0724	1.981	0.9835	1.3163	2.7984	1.7152	1.872	2.8574	0.8828	1.6152	1.6574
0.8	1.0027	1.2411	1.0176	1.3816	0.8386	1.6198	1.8638	1.9286	1.8882	2.0406	1.6645	1.908	1.4503	1.4452	0.9783	1.9255	3.0848	1.9404	1.2411	1.079	2.7356	1.5891	1.9684	3.0681	0.83	1.6573	1.5194
0.9	1.0753	1.2108	1.0454	1.1741	0.8756	1.7034	1.8863	1.7863	1.9338	2.3528	1.6081	1.8879	1.3758	1.4385	0.9902	1.8204	2.8245	2.0338	1.2616	1.3563	2.7848	1.8309	1.8996	2.9006	0.8736	1.5212	1.5642
1	1.0752	1.3934	1.2342	1.0099	0.7856	1.8147	1.9934	2.2504	1.7942	2.6972	1.655	1.9134	1.4963	1.5192	0.9494	1.9848	2.6926	1.9012	1.1216	1.3367	2.5953	1.5417	1.7816	3.0227	0.8739	1.5569	1.294
1.1	1.2312	1.3118	1.1384	1.334	0.9698	1.8381	2.1065	1.9436	1.7733	2.2368	1.6455	1.7599	1.7695	1.5545	0.8833	1.8036	2.7131	2.1386	1.2865	1.4656	2.4011	1.5773	1.8714	2.4902	0.8377	2.3398	1.3914
1.2	1.3036	1.396	1.3063	1.1211	0.951	1.981	2.1888	2.0515	1.7912	2.1612	1.7426	1.6997	2.0254	1.3458	1.0245	1.8429	2.4439	1.9956	1.0874	1.4227	2.3573	1.5749	1.8525	2.4357	0.9897	1.9243	1.0899
1.3	1.0747	1.1389	1.2643	1.3065	0.896	1.8251	2.0005	1.9371	1.8192	2.2282	1.7049	1.6383	1.7296	1.4034	0.8978	1.9787	2.2403	2.3302	1.0046	1.6369	2.4406	1.8164	1.8459	2.6727	0.9284	1.9445	1.0852
1.4	1.1312	0.95	1.2014	1.2891	0.8566	1.9243	1.9199	2.1631	1.9303	2.2511	1.4746	1.6958	1.8716	1.5855	1.0538	1.8564	2.324	2.6714	1.1456	1.6382	2.5758	1.6287	1.8983	2.8927	0.9767	1.9981	1.1894
1.5	1.0175	1.0103	0.9971	1.4791	1.0429	1.6246	1.8991	2.035	1.8568	2.2302	1.4362	1.7206	1.6624	1.4395	0.8025	1.8093	2.2363	2.4156	1.0907	1.4661	2.6528	1.3778	2.1043	2.8604	0.9413	1.812	1.2028
1.6	1.0959	1.0744	1.083	1.5215	1.1471	1.6535	2.0725	1.8905	1.7549	2.2004	1.5237	1.7559	1.6821	1.5312	0.8643	1.9153	2.2766	2.1041	0.9874	1.3167	2.9093	1.488	1.875	2.6853	0.9521	1.6987	1.1917
1.7	0.9167	0.9235	0.9266	1.4887	1.0561	1.4805	1.9437	2.097	1.8294	2.1142	1.6204	1.5483	1.636	1.5368	1.016	1.9471	2.3342	1.8895	1.0161	1.3308	2.7599	1.3622	1.9422	2.5689	0.9132	1.5809	1.1795
1.8	1.2191	1.2065	1.037	1.3505	0.9823	1.6951	2.021	2.0566	1.938	2.2726	1.3275	1.6263	1.5716	1.5994	0.7715	2.0439	2.3171	1.8206	1.1089	1.4187	2.7176	1.5386	2.1199	2.6332	1.0519	1.9859	1.0935
1.9	1.2787	1.2466	1.0294	1.4511	0.9457	1.9705	2.0673	2.3117	1.9098	2.3606	1.3052	1.4216	1.5994	1.5664	0.9478	1.9214	2.5392	1.8639	0.9923	1.3342	2.6404	1.3489	1.9149	2.7494	0.8594	2.184	1.1088
2	1.2367	1.1228	1.2068	1.2845	0.9039	1.6132	1.8507	2.1117	1.9487	2.3874	1.5061	1.3549	1.7185	1.5461	0.88	2.0132	2.3206	1.9858	1.1566	1.5582	2.4829	1.4447	1.8452	2.9076	1.0339	2.2121	1.1612
2.1	1.0454	0.9077	1.1337	1.2367	0.7736	1.464	1.7601	1.9478	1.937	2.2484	1.5134	1.6732	1.6406	1.4118	0.9342	2.0377	2.1505	1.9482	1.2809	1.339	2.4261	1.4556	1.765	2.7708	1.014	2.1499	1.2755
2.2	1.3305	1.0671	1.1373	1.1887	0.902	1.6138	1.9424	1.8018	1.9014	2.335	1.4027	1.659	1.7263	1.4284	0.972	1.9939	2.0051	1.8307	1.1811	1.5136	2.4587	1.5012	1.8664	2.8641	1.1027	2.0601	1.1276
2.3	1.5227	1.0694	1.3189	1.1654	0.9079	1.6948	1.9503	1.7782	1.9466	2.2199	1.3898	1.2409	1.5631	1.4336	0.9973	2.0329	2.157	1.9359	1.065	1.3686	2.4553	1.3744	1.8693	3.0859	0.9097	2.1256	1.0576
2.4	1.1447	1.4475	1.3133	0.9984	0.8886	1.7513	1.8725	1.7444	1.949	2.3368	1.4721	1.3882	1.4577	1.4979	0.8865	1.9376	2.2281	1.8962	0.8275	1.3131	2.52	1.4179	2.0325	2.8755	0.9434	2.0414	1.2585
2.5	1.1394	1.4286	1.2033	1.1733	0.9105	1.7668	1.8611	1.8904	2.0903	2.3338	1.369	1.3036	1.7424	1.5467	0.9482	1.8559	2.2351	2.0727	0.9574	1.6795	2.5449	1.2831	1.8619	2.9341	0.9308	2.6435	1.1403
2.6	1.2576	1.3412	1.2438	1.2414	0.9919	1.7883	2.1691	1.6541	1.9839	2.1877	1.4317	1.4695	1.9895	1.3551	0.9763	1.8243	2.1642	2.0485	0.937	1.2041	2.4799	1.2315	1.9677	2.9454	0.9759	2.1991	1.032
2.7	1.3318	1.3743	1.2988	1.3209	0.8215	1.6684	2.0029	1.9952	1.9417	2.3675	1.5434	1.4146	1.8994	1.506	0.9563	1.7152	2.0547	1.8843	1.1496	1.519	2.6619	1.4353	2.2589	3.1998	1.0458	1.8744	1.0627
2.8	1.2098	1.3775	1.5239	1.4733	0.9229	1.6622	1.9964	2.0543	1.8676	2.2232	1.4892	1.6872	1.9468	1.4201	0.8761	1.8859	2.2682	1.9383	1.0957	1.3147	2.3695	1.4256	2.4429	3.2094	0.9948	2.2417	1.1038
2.9	1.2452	1.11	1.2553	1.1633	0.8194	1.6757	1.9008	1.7805	1.7827	2.1973	1.712	1.755	1.8624	1.419	0.967	2.0063	2.5202	1.8386	1.0089	1.3484	1.9684	1.3934	2.2722	3.1282	0.9745	2.4983	1.2231
3	1.1923	1.2204	1.4511	1.3192	0.7097	1.6838	1.8966	1.7855	1.8156	2.1263	1.7338	1.6846	1.7902	1.408	1.0648	1.8628	2.4223	1.7777	1.0706	1.3513	2.334	1.3565	2.0614	3.0724	0.9436	1.8024	1.2182
3.1	1.2093	1.2564	1.3889	1.2747	1.1139	1.6931	1.74	1.8009	1.7911	2.2957	1.591	1.5741	1.6954	1.4693	1.0117	1.8712	2.5258	1.9229	1.1137	1.3584	2.5904	1.3979	2.048	3.394	1.0244	1.819	1.1691
3.2	1.1721	1.2021	1.5066	1.369	1.0063	1.7877	1.9238	1.7089	1.7553	2.2009	1.5295	1.7911	1.6033	1.696	1.0889	2.0457	2.3771	2.0024	1.1653	1.5058	2.5366	1.9514	1.7736	3.3478	0.8448	1.619	1.3353
3.3	1.2029	1.1653	1.554	1.499	0.9265	1.7655	2.2011	2.0109	1.8057	2.2664	1.5368	1.4447	1.5091	1.6152	0.8999	1.8915	2.1797	2.0211	1.1669	2.0405	2.6153	1.8009	1.9993	3.4531	0.8745	1.6828	0.9965
3.4	1.1581	1.1629	1.683	1.5418	0.9423	1.858	1.891	1.8208	1.8523	2.137	1.5478	1.4258	1.5687	1.5332	1.1201	1.8882	2.3525	2.2919	0.9323	1.5972	2.3024	1.737	1.8993	3.3704	0.9627	1.6319	1.1005
3.5	1.0713	1.2933	1.4088	1.343	1.145	1.8174	1.9839	1.609	1.9427	2.1657	1.8511	1.4921	1.4687	1.5015	0.896	1.8073	2.6709	2.2279	1.2592	1.3944	2.3151	1.7194	1.9431	3.1606	1.4188	1.6837	1.1206
3.6	1.146	1.3723	1.2757	1.2713	0.6777	1.706	2.1856	1.6392	1.8911	2.1937	1.8815	1.6682	1.4937	1.5545	1.1157	1.8179	2.5983	2.2396	1.0295	1.4411	2.2919	2.0775	1.9067	3.1358	0.9114	1.6773	1.1133
3.7	1.2699	1.2336	1.1841	1.2913	0.8624	1.9226	2.1066	1.6442	2.0103	2.3404	1.5662	1.6097	1.6873	1.3784	0.8944	1.8157	2.3598	2.3461	1.0259	1.5412	2.4971	1.9393	1.9909	3.1961	1.049	1.7766	1.039
3.8	1.2609	1.3238	1.4268	1.233	0.9169	1.6393	1.7093	1.8535	1.8409	2.1039	1.6054	1.5014	1.5268	1.5699	1.0442	1.7231	2.2655	2.6817	1.0098	1.6323	2.382	2.1157	1.973	3.231	0.8704	1.6322	1.1794
3.9	1.1604	1.1607	1.4136	1.2927	0.9477	1.6203	1.9937	1.7911	1.8505	2.1909	1.7303	1.5619	1.676	1.4708	0.9224	1.6923	2.2151	2.5731	1.1357	1.4948	2.5849	2.1098	1.8246	3.11	1.0097	1.7249	1.215
4	1.1427	1.0912	1.1031	1.4575	0.8262	1.5693	2.1768	1.5849	1.6428	2.4018	1.6419	1.452	1.5736	1.5082	0.9555	1.9021	1.9726	2.5501	0.963	1.5161	2.3657	2.1649	1.7739	3.1226	1.0078	1.7788	1.0246
4.1	1.4302	1.2516	1.1763	1.3666	0.8405	1.6158	1.8742	1.9845	1.8279	2.1206	1.5821	1.521	1.6314	1.5572	1.0438	1.7887	2.0753	2.5762	0.8833	1.3705	2.4771	1.8654	1.8467	3.1229	1.0143	1.8936	1.0975
4.2	1.3065	1.5472	1.4451	1.3522	0.7922	1.7728	1.912	1.6592	1.7243	2.2685	1.2704	1.5826	1.4429	1.6142	0.8954	1.8888	2.3883	2.6399	1.0657	1.4823	2.6202	1.8855	1.847	2.9032	1.0008	1.6772	1.0372
4.3	1.2332	1.1573	1.3071	1.1109	0.8369	1.9682	1.9441	1.4981	1.6946	2.1741	1.5156	1.7004	1.4633	1.6109	1.0557	1.9384	2.4267	2.4413	1.1062	1.5828	2.545	1.4965	1.6904	3.1167	1.0025	1.733	1.195
4.4	1.3033	1.1931	1.4897	1.1444	0.9205	1.7057	2.0737	1.6415	1.7656	2.4526	1.655	1.6784	1.6671	1.5422	0.8966	1.8455	2.6231	2.9232	1.1563	1.5157	2.4196	1.4904	1.6907	3.3473	0.8849	1.8286	1.1022
4.5	1.1171	1.4054	1.4713	1.3076	0.8307	1.5519	2.1192	1.81	1.6957	2.3255	1.455	1.5106	1.5677	1.5912	0.8975	1.9714	2.2264	2.783	1.0021	1.716	2.533	1.4303	1.6692	3.2377	1.0665	2.04	1.0671
4.6	1.1519	1.3514	1.4579	1.4014	0.9495	1.6471	1.8558	2.0308	1.6564	2.3541	1.4658	1.7054	1.3946	1.6539	0.9544	2.078	2.1032	2.6549	1.1199	1.4415	2.201	1.408	1.8447	3.0505	1.2938	1.7863	1.0629
4.7	1.4279	1.2206	1.2497	1.3027	1.0337	1.8841	1.8985	1.9389	1.7562	2.4446	1.3527	1.6157	1.6077	1.5262	0.901	2.0145	2.1902	2.5991	1.0511	1.4959	2.477	1.2858	1.8659	3.1403	1.2216	2.0824	0.9712
4.8	1.1679	1.3619	1.2147	1.0148	0.9561	1.7669	1.9	1.595	1.7037	2.2403	1.3999	1.6393	1.948	1.5175	0.843	2.3584	2.2952	2.7124	1.2164	1.434	2.1106	1.3647	1.6941	3.4518	1.3314	1.8107	1.1368
4.9	1.3335	1.3561	1.3918	1.1404	1.0235	1.5225	1.8577	1.7744	1.7782	2.1853	1.4122	1.5061	1.971	1.5221	0.9908	2.1167	2.2007	2.6875	0.861	1.5802	2.4014	1.3051	1.7472	3.3533	1.0378	1.9079	1.067
5	1.3813	1.2947	1.4167	1.4336	0.8798	1.6425	1.9928	1.8459	1.747	2.2324	1.3256	1.5172	1.8648	1.5005	1.0604	1.953	2.1899	2.635	1.068	1.4995	1.8631	1.6249	1.7819	3.0221	1.0249	1.7495	0.9657
5.1	1.5475	1.1773	1.2941	1.2246	0.9753	1.7527	2.1486	1.7287	1.9013	2.2043	1.3519	1.6355	1.5683	1.6111	0.9315	1.8088	2.4781	2.6671	1.0904	1.5696	2.442	1.8648	1.8071	2.9874	0.9825	1.6948	1.2168
5.2	1.4431	1.2045	1.3748	1.2249	1.0628	1.8514	1.9501	1.7705	1.7528	2.4971	1.561	1.5297	1.1877	1.5733	0.9892	1.9633	2.4628	2.5877	1.328	1.5765	2.5248	1.4806	1.816	2.7107	0.9862	1.687	1.0789
5.3	1.3267	1.4025	1.3913	1.2446	0.9529	1.563	1.7729	1.8032	1.7066	2.2928	1.3366	1.54	1.4031	1.5049	1.0553	1.9411	2.5663	2.5791	1.1062	1.5785	2.6681	1.4717	1.7255	2.5935	1.0531	1.5428	1.0461
5.4	1.4368	1.2538	1.5561	1.4378	1.0285	1.5859	2.072	2.1397	1.9599	2.272	1.483	1.3962	1.2947	1.525	0.9563	1.7955	2.5181	2.3124	1.0552	1.6272	2.7034	1.6187	1.9757	3.0187	1.0757	1.7769	1.1394
5.5	1.6758	1.1338	1.4178	1.231	0.9648	1.8301	2.0169	2.018	1.8723	2.4516	1.8005	1.6094	1.2206	1.3912	0.9163	1.9464	2.3409	2.5386	0.8828	1.6595	2.5514	1.489	1.6832	3.0982	1.0596	1.7231	1.2297
5.6	1.3213	1.0434	1.5344	1.0622	0.9512	1.6952	1.9481	1.9981	1.806	2.2714	1.7534	1.6952	1.2972	1.3737	0.8319	1.7814	2.3665	2.187	0.977	1.5325	2.7752	1.283	1.8064	2.9563	1.2317	1.9243	1.0311
5.7	1.4458	1.269	1.5249	1.273	1.0038	1.7754	2.1669	2.1936	1.7057	2.1953	1.8475	1.6594	1.3729	1.524	1.0641	2.0006	2.499	2.3706	0.9742	1.5624	2.5035	1.3673	1.7696	2.7468	1.0341	1.7805	1.1924
5.8	1.5746	1.1617	1.5591	1.2866	0.8857	1.8238	2.009	2.0518	1.7633	2.1634	1.8172	1.5981	1.2385	1.4753	1.0272	1.854	2.4145	2.2046	1.0124	1.6475	2.2992	1.4113	1.7668	2.7699	1.0768	1.7666	1.1653
5.9	1.3379	1.2117	1.6964	1.3668	0.9459	1.7128	2.118	2.0521	2.0611	2.0562	1.8681	1.5993	1.2871	1.4725	1.1199	1.9337	2.5358	2.3318	1.063	1.7106	2.4148	1.3177	1.6978	2.6302	1.053	1.7039	1.0085
6	1.4156	1.1963	1.539	1.2851	1.1038	1.8432	2.2233	1.9805	1.8998	2.2682	2.1228	1.3842	1.4796	1.6123	1.071	1.7978	2.2371	2.0237	1.1039	1.7133	2.595	1.2247	1.7523	2.6617	1.0732	1.9078	1.1075
6.1	1.2337	1.4539	1.6054	1.3298	1.0065	1.6399	2.3719	1.8522	1.7839	2.0417	1.8416	1.3922	1.4102	1.5154	0.9616	1.7587	2.2638	2.2851	1.021	1.5278	2.1239	1.3159	1.92	2.9272	1.0751	2.0572	1.054
6.2	1.393	1.3754	1.8044	1.1103	0.7943	1.7304	2.4521	2.0945	1.8346	2.18	1.9704	1.406	1.4425	1.4324	0.9861	1.8463	2.1836	2.2973	0.9738	1.7091	2.299	1.5387	1.8404	2.9018	0.9192	1.9607	1.0499
6.3	1.3311	1.5301	1.5042	1.1183	0.917	1.6143	2.0933	1.8717	1.6779	2.1412	2.2714	1.5234	1.5023	1.4851	0.7273	2.0494	2.0799	2.2779	0.9773	1.6546	2.5342	1.6288	1.8169	2.8245	1.0939	1.7696	0.9275
6.4	1.3286	1.2448	1.3842	1.2365	1.0374	1.6679	2.1214	1.7272	1.6757	2.2939	2.1262	1.621	1.4072	1.4332	0.8303	1.9926	1.8526	2.1558	1.1048	1.4298	2.308	1.358	1.7777	3.0675	1.0524	1.9171	1.3029
6.5	1.2558	1.0447	1.319	1.2628	0.9061	1.6845	2.312	2.0069	1.6905	2.1487	2.1044	1.3846	1.7017	1.4212	0.8961	1.7923	2.3998	2.3424	1.059	1.5785	2.2706	1.4433	1.6154	2.8548	1.0239	2.1575	1.1752
6.6	1.4921	1.2624	1.4919	1.3809	0.8046	1.7694	2.447	2.3736	1.7304	2.2907	2.2707	1.3123	1.3264	1.588	0.706	1.833	2.4176	2.4169	1.2161	1.7385	2.3186	1.5098	1.728	2.8344	0.9141	1.8418	1.3966
6.7	1.3282	1.3292	1.4838	1.321	0.7875	1.8501	2.1982	2.4581	1.7936	2.3738	2.2812	1.3927	1.2225	1.5961	0.6822	1.8136	2.3508	2.7158	1.0976	1.6985	2.2539	1.4737	1.8589	2.9172	0.9391	1.8805	1.2632
6.8	1.6075	1.251	1.5307	1.0884	0.7122	1.6849	2.1431	2.4931	1.7395	2.1367	2.3642	1.4319	1.4489	1.4901	0.9394	2.0018	2.2697	2.6769	1.1561	1.6514	2.4009	1.3725	1.5065	2.8542	1.0048	1.7862	1.3118
6.9	1.6471	0.9988	1.3402	1.0216	0.8093	1.8239	2.2325	2.5096	1.8023	2.3524	2.4105	1.37	1.4595	1.5891	0.8148	1.8288	2.1216	2.6514	0.8349	1.6148	2.4044	1.4662	1.8334	2.735	0.928	1.993	1.2167
7	1.4557	1.2954	1.7876	1.2595	0.7018	1.6856	2.1451	2.7475	1.7758	2.2962	2.5552	1.519	1.3424	1.5119	0.7688	2.0582	2.2753	2.4972	0.8518	1.809	2.7353	1.3735	1.7332	3.1146	1.1027	1.8519	1.1981
7.1	1.7697	1.0695	1.585	1.3529	0.9801	1.7063	2.2906	2.4981	1.8541	2.3313	1.9705	1.3262	1.4162	1.5165	0.9338	2.0018	2.4288	2.6831	0.9051	1.6134	2.9291	1.1008	1.7978	3.1057	1.1666	1.8959	1.195
7.2	1.296	1.2526	1.4436	1.3359	0.9157	1.8887	2.5015	2.4532	1.7966	2.5009	1.832	1.339	1.5922	1.4924	0.8013	2.0631	2.3165	2.603	1.1398	1.785	2.6226	1.2407	1.7152	2.7487	1.0431	2.0086	0.978
7.3	1.3146	1.1229	1.4049	1.2607	0.7871	1.909	2.6238	2.2771	1.7766	2.2302	1.9762	1.1674	1.4777	1.5563	0.8958	1.944	2.1117	2.5983	0.9522	1.576	2.5782	1.1577	1.7998	2.8838	0.9059	1.9359	1.0548
7.4	1.3202	1.0211	1.5521	1.1871	0.8311	1.8343	2.4268	2.1782	1.7515	2.2859	2.0466	1.4032	1.4114	1.5845	0.8581	2.2044	2.2886	2.2718	0.9817	1.5237	2.6802	1.2349	1.8715	2.8977	1.0434	1.71	0.9326
7.5	1.4976	1.1804	1.4894	1.3469	1.0524	2.0231	2.1927	2.1597	1.6463	2.1367	1.8294	1.2648	1.3783	1.5466	1.0005	1.9813	2.3213	2.8108	0.8996	1.4634	2.637	1.3551	1.6059	3.0674	1.0795	1.7774	1.0678
7.6	1.4191	1.1611	1.5505	1.4529	1.0789	1.8549	2.0148	2.2665	1.7676	2.0965	1.4246	1.2424	1.4443	1.6339	0.9594	1.9342	2.5355	2.8351	0.9594	1.4778	2.4063	1.2909	1.8476	3.1083	1.3649	1.889	1.1044
7.7	1.6236	0.9433	1.2453	1.3077	0.6874	1.9039	1.8638	1.9222	1.9289	2.1279	1.6404	1.3002	1.422	1.4775	1.0577	1.8503	2.7432	2.524	0.9616	1.5444	2.6247	1.3434	1.4954	3.0127	1.2772	1.732	1.1382
7.8	1.3895	1.1371	1.3571	1.2961	0.763	1.9084	2.1122	2.1605	1.9238	1.9671	1.8717	1.2204	1.4771	1.5489	1.0155	2.0466	2.7021	2.4087	1.0252	1.657	2.9256	1.2875	1.7039	2.9347	1.1174	1.4883	0.9942
7.9	1.3946	1.1039	1.6154	1.396	0.8939	1.4593	2.4662	2.3425	1.9732	2.3504	1.8863	1.2807	1.5501	1.5941	1.0679	1.9465	2.6391	2.3658	0.9152	1.7104	2.5198	1.5913	1.789	2.991	1.0692	1.6271	1.1252
8	1.3115	1.1094	1.6792	1.3022	0.7856	1.5919	2.1225	2.2499	1.6616	2.4744	1.769	1.2101	1.5161	1.5604	1.2491	2.1653	2.5135	2.2017	1.058	1.6926	2.4567	1.3023	1.5494	2.7972	1.2064	1.7181	1.1983
8.1	1.4105	1.1079	1.5482	1.2417	0.8244	1.7498	1.966	2.3755	1.7509	2.4209	1.8943	1.2486	1.5326	1.5458	1.1768	2.0323	2.8612	2.3954	1.0356	1.5373	2.5524	1.4326	1.5593	3.0592	1.2298	1.582	1.099
8.2	1.319	1.0781	1.5427	1.0225	0.9153	1.7599	2.0257	2.3293	1.7136	2.5948	1.5691	1.2372	1.5138	1.588	1.1411	1.8487	2.5269	2.3202	1.0579	1.7774	2.346	1.4893	1.616	2.8797	1.0437	1.879	1.3227
8.3	1.3859	1.0131	1.3859	1.1009	0.9266	1.6547	1.9855	2.4505	1.7741	2.4999	1.501	1.3232	1.4666	1.6678	1.157	2.0383	2.358	2.2628	1.042	1.6952	2.624	1.6335	1.7797	3.074	1.0175	1.6882	1.0773
8.4	1.4529	1.3072	1.55	1.0268	1.2139	1.8287	2.0646	2.4094	1.8172	2.3791	1.8692	1.3929	1.431	1.4599	1.0611	2.0075	2.3677	2.599	1.0688	1.6479	2.2262	1.3475	1.5331	3.1489	0.971	1.7083	1.2271
8.5	1.3589	1.2362	1.5541	1.1927	0.8784	1.5882	2.1451	2.4615	1.7451	2.405	1.8169	1.1788	1.5099	1.4955	1.1232	1.9738	2.2661	2.4923	1.0183	1.7491	2.2797	1.3507	1.8315	2.9818	1.0173	1.6488	1.072
8.6	1.4808	1.1598	1.5136	1.0898	1.0031	1.7631	2.0842	2.0949	1.7034	2.52	2.1259	1.3085	1.4854	1.4065	1.0623	2.006	2.1833	2.4801	1.1765	1.5651	2.2927	1.4248	1.7584	2.8681	1.0896	1.7499	0.9391
8.7	1.3717	1.089	1.5903	1.2528	0.967	1.698	1.9844	2.2456	1.7035	2.3408	1.9799	1.237	1.4815	1.4339	1.0502	2.0312	2.3034	2.1529	1.1069	1.6278	2.5382	1.5367	1.8363	3.041	1.1717	1.9973	1.0789
8.8	1.4836	1.0129	1.6507	1.2641	0.9942	1.6021	2.1973	2.2047	1.7774	2.3135	1.8061	1.2557	1.5605	1.3088	1.0627	1.9943	2.3582	2.2826	1.1198	1.8008	2.6151	1.7418	1.7002	2.937	1.0103	1.624	1.0919
8.9	1.4669	0.9733	1.4786	1.4559	1.5763	1.622	2.1814	2.6288	1.7987	2.3109	1.5973	1.2339	1.4444	1.479	1.0191	1.9277	2.2909	2.2843	1.0034	1.6502	2.7937	1.3582	1.6226	2.9174	1.116	1.736	1.0568
9	1.3304	1.1677	1.3308	1.4482	1.0722	1.7466	2.0702	2.0953	1.7142	2.356	1.5938	1.3679	1.4753	1.554	0.9714	1.9375	2.421	2.4487	1.1682	1.6897	2.7642	1.6517	1.613	2.8406	1.1481	1.7063	0.993
9.1	1.2987	1.1327	1.4077	1.329	0.9671	1.5044	2.0032	2.6184	1.7986	2.3823	1.8119	1.296	1.2906	1.4264	0.8475	1.9611	2.6805	2.3725	1.2848	1.5969	2.9842	1.5237	1.5625	2.9121	1.0547	1.7682	1.1032
9.2	1.6682	1.0703	1.3708	1.1837	0.9689	1.952	1.939	2.5177	1.7617	2.426	1.6287	1.388	1.3615	1.4299	0.895	1.7203	2.3508	2.2922	1.1458	1.5396	2.4694	1.4885	1.6469	2.9803	1.1188	1.7355	1.0477
9.3	1.4015	1.0354	1.2836	1.227	0.9553	2.0087	2.1033	2.9258	1.7851	2.3605	1.6245	1.7294	1.541	1.3799	0.9994	1.7238	2.7065	2.4919	1.0937	1.7071	2.2465	1.4528	1.7366	2.8634	1.1825	1.6267	0.8276
9.4	1.2818	1.365	1.409	1.0731	1.2385	1.871	2.0439	2.6533	1.8806	2.3627	1.8199	1.4172	1.4244	1.5118	0.8669	1.8337	2.4479	2.2821	1.1456	1.7745	2.2999	1.3754	1.6587	2.7548	1.2738	1.7453	0.9232
9.5	1.3544	1.0868	1.2467	1.2168	0.8574	2.1493	2.038	3.1165	1.7559	2.2906	1.655	1.4062	1.5488	1.2832	1.0442	1.9761	2.5972	2.36	1.3674	1.7065	2.3815	1.269	1.7719	2.8096	1.3028	1.824	1.0107
9.6	1.4111	1.293	1.4775	1.1448	0.8035	1.8243	2.1587	3.0125	1.8675	2.1975	1.7122	1.4769	1.4272	1.4929	0.8587	1.769	2.3922	2.4374	1.2189	1.532	1.8555	1.3703	1.638	2.7535	1.1945	1.7272	1.1148
9.7	1.3458	1.3156	1.4847	1.222	0.8717	1.6706	2.097	2.7873	1.6839	2.0767	1.5646	1.5088	1.6799	1.3976	0.765	1.6629	2.3337	2.5347	1.211	1.4001	2.1218	1.6603	1.7137	2.9718	1.1149	1.8987	1.0505
9.8	1.2405	1.2218	1.3995	1.2926	0.8719	1.6577	1.9345	3.0574	2.1418	2.1022	1.6153	1.5216	1.8228	1.4057	0.9721	1.7628	2.4265	2.2224	1.2792	1.6371	2.0893	1.5443	1.9332	2.8782	1.2074	1.7962	1.0031
9.9	1.3203	1.2123	1.398	1.2421	0.7361	1.8197	1.9324	3.0036	2.0199	2.3458	1.5561	1.3866	1.7288	1.4609	0.7573	1.7806	2.4367	2.4383	1.3724	1.7133	1.9119	1.6838	1.979	2.9174	1.2766	1.8817	1.1075
10	1.2159	1.1617	1.2203	1.2544	0.8334	2.1199	2.2212	3.2468	2.1179	2.25	1.5565	1.4657	1.6572	1.4175	1.0449	1.8755	2.6953	2.418	1.2351	1.7489	2.1261	1.7603	1.7213	2.9269	1.2784	1.9588	0.9344
10.1	1.4241	1.405	1.3975	1.1766	0.8449	2.0054	1.9995	3.122	1.8902	2.3095	1.5291	1.3267	1.5701	1.6114	0.8642	1.8582	2.7504	2.4001	1.1662	1.6356	2.0395	1.6781	1.7082	2.8093	1.1377	1.8654	0.9859
10.2	1.3797	1.3701	1.4104	1.2642	0.7994	1.8873	2.2053	2.9225	1.9384	2.1197	1.6896	1.3738	1.53	1.4075	1.0198	1.8392	2.5522	2.5341	1.1827	1.6784	1.9226	1.4797	1.629	2.7103	1.2375	2.0041	0.979
10.3	1.3133	1.2443	1.5934	1.3102	0.8774	2.0003	1.8272	3.4959	1.9276	2.38	1.6513	1.4417	1.6938	1.3691	0.9144	1.6946	1.915	2.4202	1.0627	1.6473	2.0732	1.4017	1.697	2.2727	1.1189	2.1968	1.1937
10.4	1.2827	1.3111	1.4418	1.2638	0.8196	1.8651	1.9058	3.2988	1.8914	2.3467	1.6352	1.4857	1.7222	1.5174	0.8655	1.7967	2.4662	2.1124	1.133	1.6084	2.2737	1.554	1.7646	2.5416	1.2708	1.7506	1.1042
10.5	1.3881	1.0032	1.623	1.3163	0.8522	1.9785	2.036	3.2469	1.9667	2.3681	1.5042	1.4095	1.5534	1.4765	0.8447	1.864	2.2461	1.9405	0.9564	1.6825	2.304	1.415	1.8566	2.557	1.103	1.9801	1.1399
10.6	1.2742	1.0301	1.6095	1.4247	0.9669	1.8311	1.8858	3.1405	2.0447	2.3332	1.5644	1.4751	1.4853	1.5861	0.9721	1.821	1.9649	2.0387	1.2447	1.7042	2.188	1.527	1.9482	2.4737	1.2634	1.877	1.1155
10.7	1.2167	1.2121	1.6021	1.3397	0.9046	2.2092	2.1504	2.9245	1.8201	2.3236	1.5796	1.4104	1.3989	1.3672	0.9649	1.9984	2.2419	2.0928	1.5248	1.9105	2.4236	1.6469	1.7142	2.7284	1.3292	1.8836	1.0234
10.8	1.2119	1.5188	1.5571	1.4652	0.7976	2.1533	1.9249	2.4971	1.7654	2.2729	1.6359	1.5324	1.4493	1.5434	0.9173	1.8319	2.3108	2.0644	1.2405	1.5812	3.0966	1.6476	1.7037	2.8268	1.0842	1.8162	0.997
10.9	1.4451	1.539	1.5722	1.2296	0.8146	1.909	1.9198	2.6338	1.9566	2.3588	1.6237	1.4107	1.6392	1.4854	0.8717	1.778	2.4267	2.0155	1.1918	1.801	2.5352	1.567	1.8151	2.8546	1.2968	1.7039	1.0543
11	1.6423	1.5703	1.489	1.4135	0.7327	2.3077	2.0542	2.9539	1.9228	2.3417	1.6131	1.2455	1.3211	1.5042	1.0168	1.9296	2.5429	2.043	1.2557	1.7701	2.0326	1.5662	1.7796	2.938	1.1786	1.7063	1.0555
11.1	1.5185	1.8068	1.6885	1.602	0.7468	2.2307	2.1131	2.6131	1.7625	2.3247	1.6506	1.4504	1.4877	1.5167	0.9067	1.8384	2.3665	2.0191	1.0758	1.8074	2.0049	1.2827	1.9523	3.0561	1.0975	1.7811	1.2279
11.2	1.341	1.5004	1.4504	1.4577	0.8554	2.1193	2.0664	2.6878	1.8329	2.4085	1.6073	1.2406	1.429	1.5402	0.8944	1.7767	2.3612	2.0316	1.2004	1.7683	1.9454	1.2279	1.7943	2.8099	0.9558	1.8593	1.1677
11.3	1.3368	1.3131	1.7206	1.36	0.7212	1.9422	1.9618	2.8234	1.9698	2.2396	1.5409	1.4124	1.4767	1.5038	0.8105	1.8818	2.2298	2.1735	1.2245	1.8513	2.0641	1.3056	1.8803	2.763	1.2547	1.4553	1.0568
11.4	1.5675	1.3796	1.5259	1.3989	0.8316	1.9611	2.0915	3.0958	1.8518	2.29	1.6535	1.3793	1.3617	1.476	0.8947	1.9214	2.0568	2.1143	1.1265	1.8343	1.9035	1.4339	1.6464	2.8977	1.5101	1.6025	1.0814
11.5	1.3013	1.155	1.5791	1.4312	0.7296	1.8949	1.9914	3.0072	1.8912	2.081	1.5541	1.3163	1.3407	1.5166	0.9387	1.7684	2.2795	2.0173	1.15	1.8458	1.9795	1.2012	1.731	2.7391	1.318	1.6325	0.9979
11.6	1.4166	1.487	1.5706	1.4136	0.9053	1.7641	1.9856	3.1114	1.7568	2.3224	1.7841	1.2419	1.4101	1.5621	0.9938	1.941	2.3475	2.048	1.1798	1.7462	2.0288	1.5373	1.6096	3.0726	0.8916	1.7127	1.0509
11.7	1.4347	1.4262	1.5315	1.5359	0.8652	2.0461	2.0521	3.5902	1.7038	2.19	1.7891	1.4146	1.3593	1.592	0.9393	1.7696	2.3249	1.8472	1.2759	1.8574	2.0645	1.4013	1.5404	2.8796	1.1302	1.5032	1.0039
11.8	1.2878	1.5075	1.4802	1.2758	0.7898	1.7818	2.0241	3.4793	1.7345	2.0575	1.7833	1.1827	1.5838	1.4864	0.9976	1.9329	2.4367	1.8793	1.2342	1.725	2.0176	1.4198	1.6623	2.9471	0.9337	1.4875	1.0983
11.9	1.4322	1.6387	1.484	1.1543	1.0038	1.5859	1.9977	3.7413	1.8755	2.2582	1.4575	1.3328	1.8794	1.3962	0.8666	1.947	2.3629	1.9717	1.2865	1.6089	1.9699	1.5059	1.626	2.7089	0.9619	1.3858	1.434
12	1.4495	1.2322	1.3751	1.3684	0.9955	1.7977	1.9713	3.3954	1.9076	2.3034	1.6039	1.3287	1.9091	1.47	0.9111	1.9185	2.4327	1.9117	1.3999	1.7904	2.2358	1.4477	1.8377	2.5524	0.9883	1.5983	1.024
12.1	1.2792	1.1613	1.5562	1.5031	0.7081	1.5265	2.1157	3.6254	1.7861	2.2792	1.7343	1.0859	1.8684	1.4357	0.9587	2.0402	2.152	2.0567	1.4668	1.7434	2.127	1.3842	1.7032	2.8923	0.9146	1.7081	1.1061
12.2	1.2214	1.5747	1.8556	1.4157	0.9695	1.5755	1.9193	3.6664	1.8485	2.1965	1.6643	1.4454	1.3439	1.4573	0.8453	1.8587	2.3279	1.9645	1.437	1.8284	2.4009	1.3751	1.8202	3.1419	0.9114	1.5566	1.0475
12.3	1.3043	1.4051	1.5869	1.1357	1.0218	1.7027	1.82	3.6018	1.9074	2.3693	1.787	1.1845	1.4733	1.5185	0.7388	2.0863	2.2709	1.9876	1.2549	1.5986	2.3417	1.4286	1.6171	3.2843	1.038	1.6119	1.1031
12.4	1.3209	1.301	1.4985	1.362	0.8457	1.7335	1.9882	3.5591	1.808	2.17	1.8768	1.2775	1.7433	1.4508	0.9048	2.0552	2.091	2.0746	1.6004	1.7136	1.8913	1.3447	1.7969	2.9968	0.9663	1.5735	1.0871
12.5	1.2887	1.4912	1.4778	1.3803	0.8653	1.8134	2.0787	3.7098	1.8593	2.1784	1.7655	1.346	1.8362	1.381	0.8774	1.932	2.3048	2.1181	1.5088	1.8243	2.018	1.2115	1.5983	2.9145	1.1826	1.6642	1.1134
12.6	1.2229	1.5258	1.2895	1.3935	0.8147	1.6017	2.0027	3.4663	1.944	2.4079	1.6298	1.3759	1.8126	1.471	0.9275	1.8307	2.0476	2.2808	1.5745	1.8003	2.1308	1.2824	1.576	2.9713	1.0774	1.8089	1.0505
12.7	1.1345	1.5173	1.4912	1.5443	0.7038	1.8141	2.0553	3.4577	1.7663	2.2577	1.8151	1.3174	1.9715	1.5588	0.9736	1.8715	2.2366	2.0012	1.2649	1.8221	1.9029	1.4541	1.6136	3.0565	1.1046	1.7841	1.1081
12.8	1.4588	1.4044	1.4997	1.3656	0.7656	1.874	2.0388	3.6364	1.7275	2.3485	1.8817	1.4067	2.1075	1.5115	0.93	1.8912	2.3903	1.9526	1.6991	1.8521	1.9996	1.3257	1.7758	2.8026	0.9619	1.5445	1.267
12.9	1.2124	1.4727	1.4158	1.3112	0.7342	1.8754	1.9919	3.5016	1.8113	2.3687	1.8279	1.2689	2.3819	1.4788	1.0314	1.9558	2.2684	1.9394	1.4618	1.5936	2.365	1.4245	1.9261	3.0319	0.975	1.5586	1.1611
13	1.252	1.7113	1.5975	1.4004	0.7032	1.8419	1.925	3.352	1.8915	2.3413	1.8324	1.2397	2.3918	1.5871	1.1158	1.9021	2.1485	1.9788	1.2737	1.716	2.2675	1.4616	1.6908	3.2781	1.1233	1.6431	1.1464
13.1	1.2895	1.6231	1.3881	1.2834	0.7769	1.8728	1.8274	3.5478	1.9681	2.0222	1.7151	1.3272	2.2606	1.5935	0.9334	1.8179	2.2054	1.9779	1.5736	1.6454	2.3547	1.5733	1.7609	3.0318	1.0855	1.4944	1.1956
13.2	1.3667	1.6028	1.3756	1.3454	0.8269	1.6724	1.7932	3.4389	1.8217	2.1783	1.7686	1.3053	2.4858	1.5081	1.1095	1.9496	1.9978	1.9983	1.3507	1.6725	2.0486	1.396	1.8976	3.1006	1.207	1.5212	1.0259
13.3	1.4018	1.6256	1.3802	1.3505	0.9056	1.7667	1.973	3.5896	1.6892	2.2204	1.6864	1.2911	2.1892	1.5088	1.1016	1.9251	2.2044	2.1006	1.1945	1.9062	2.1951	1.4117	1.7127	2.8487	0.9996	1.7995	0.8398
13.4	1.4643	1.5166	1.6571	1.3988	0.8214	1.8187	2.0688	3.3253	1.8864	2.421	2.0367	1.2866	2.4669	1.5312	1.0589	1.9152	2.591	2.1765	1.3334	1.7542	2.3916	1.4254	1.8005	2.6134	1.0779	1.5352	0.9691
13.5	1.3022	1.4887	1.6067	1.2119	1.0409	1.5763	1.9022	3.3708	1.9349	2.163	1.9554	1.2876	2.4402	1.6171	1.1949	1.9417	2.2825	2.2153	1.3762	1.6878	2.3176	1.4634	2.0693	2.8996	1.0282	1.7384	1.0518
13.6	1.4645	1.4723	1.3678	1.511	0.7887	1.686	2.0625	3.5331	2.0547	2.3646	1.6088	1.2089	2.3902	1.438	1.2073	1.8405	2.4361	1.942	1.5936	1.4925	2.1985	1.3348	2.0209	2.682	1.0569	2.0456	1.0023
13.7	1.4186	1.5453	1.7424	1.3924	0.7648	1.9671	2.2168	3.4637	1.9052	2.2467	1.7844	1.321	2.4033	1.4588	1.1828	1.7567	2.1489	1.9732	1.4499	1.7801	2.0745	1.3966	1.7665	2.6586	1.022	1.6869	0.9546
13.8	1.3574	1.3912	1.6591	1.2968	0.7805	2.1625	1.7173	3.1307	1.8852	2.1979	1.7421	1.2793	2.5109	1.3829	1.149	1.8431	2.3428	1.9996	1.2713	1.8348	1.9409	1.4218	1.6409	2.8385	1.2989	1.8135	0.9767
13.9	1.3998	1.7567	1.3914	1.2522	0.8226	1.966	1.7847	3.1096	1.811	2.1359	1.6043	1.2448	2.5737	1.5297	1.0672	1.8648	2.3832	2.0288	1.3773	1.8365	1.9402	1.4107	1.775	2.7155	1.0576	1.8361	1.0118
14	1.5134	1.633	1.5631	1.2279	0.7751	2.0739	1.8484	3.2719	1.8394	2.1268	1.5581	1.3927	2.3873	1.5027	1.0553	1.9158	2.6341	2.0023	1.2259	1.7458	1.9976	1.2635	1.7082	2.5115	0.9461	1.8686	0.9347
14.1	1.3571	1.5146	1.6705	1.2941	0.6724	2.0697	2.0077	3.3089	1.7306	2.1237	1.503	1.3256	2.2239	1.4033	1.2093	1.9392	2.5882	1.8966	1.3488	1.8312	1.9457	1.2798	1.9029	2.8027	1.0487	2.0381	1.2128
14.2	1.4573	1.5403	1.6576	1.2014	0.7834	2.0891	1.9467	3.1219	1.6832	2.1154	1.4534	1.2454	2.3939	1.3997	1.1516	1.934	2.2233	1.9633	1.504	1.8576	1.8363	1.2752	1.9219	2.6363	1.1492	1.7127	1.0701
14.3	1.4943	1.5349	1.5546	1.1782	0.8658	1.4704	2.0023	3.2508	1.5963	2.3125	1.6064	1.2115	2.4618	1.5646	1.0201	1.9202	2.3055	1.8201	1.4078	1.6935	1.9499	1.3554	1.3941	2.6068	1.0593	1.7286	1.1633
14.4	1.4498	1.7415	1.6043	1.309	0.8962	1.5294	2.0008	3.2748	1.7413	2.2818	1.5312	1.3589	2.556	1.5296	1.0858	1.987	2.1974	1.9686	1.5943	1.5625	2.1451	1.4123	1.5469	2.8347	1.133	1.8024	1.0693
14.5	1.3965	1.6509	1.428	1.2704	0.8508	1.5583	1.9682	3.3535	1.8984	2.4014	1.5717	1.2979	2.196	1.5657	1.0833	2.0913	2.2518	1.8393	1.4538	1.569	2.1181	1.3469	1.7604	2.4164	1.1678	1.7837	1.0842
14.6	1.4582	1.7698	1.4613	1.1147	0.6878	1.3957	1.7586	3.2144	1.6329	2.1166	1.8368	1.2132	2.3423	1.627	1.0467	2.0691	2.1089	1.9628	1.2205	1.7216	2.063	1.4763	1.7683	2.7128	1.0769	1.8116	1.038
14.7	1.484	1.5824	1.4125	1.3272	0.9233	1.7496	1.7406	3.3574	1.8458	2.052	1.5717	1.2437	2.6698	1.5767	1.1233	2.1194	2.0618	1.8615	1.3652	1.6201	2.1849	1.333	1.7237	3.0465	1.0694	1.7718	0.9345
14.8	1.3397	1.776	1.3571	1.2135	0.8983	1.9511	2.0411	3.1155	1.8201	2.0745	1.6382	1.3856	2.5438	1.4677	1.1866	1.997	2.0012	2.1191	0.9863	1.9255	2.3744	1.5523	1.8552	2.6958	1.0527	1.8122	1.065
14.9	1.2408	1.5967	1.4231	1.123	0.8395	1.6083	2.14	3.0449	1.9936	2.2667	1.6036	1.4083	2.457	1.531	1.2748	1.9707	2.4999	1.9299	1.4724	1.8217	2.1044	1.3963	1.7309	2.8149	1.0609	1.8926	1.0827
15	1.3786	1.2862	1.4487	1.1999	0.7663	1.6595	2.1542	2.8321	1.8998	2.0479	1.7014	1.2808	2.5691	1.401	1.2074	2.1207	2.3873	2.114	1.4546	2.0976	2.112	1.5519	1.8167	2.8707	1.027	2.0375	1.237
15.1	1.4461	1.3931	1.3196	1.1376	0.7611	1.5962	2.0982	2.9128	1.9009	2.0673	1.7823	1.3129	2.5359	1.4976	1.0747	1.9845	2.1716	2.2977	1.3704	1.8758	2.1182	1.4548	1.825	2.9487	0.9103	1.982	1.1999
15.2	1.1742	1.6649	1.3208	1.3026	0.753	1.9081	2.0769	2.7745	1.7633	1.988	1.6478	1.1791	2.4829	1.4451	1.0787	1.8192	2.6568	2.2852	1.2952	1.7154	1.9851	1.361	1.9157	2.7756	0.9979	1.7725	1.1507
15.3	1.0987	2.1042	1.4015	1.1698	0.7944	1.8479	1.8908	2.9027	1.8409	2.1698	1.5703	1.2828	2.3375	1.5956	1.2772	1.8774	2.5521	2.3467	1.5226	1.7718	1.8025	1.4115	1.7726	2.9778	0.9577	1.922	0.9212
15.4	1.1976	2.0691	1.5486	1.1196	0.8048	1.6524	2.0002	2.789	1.7508	2.1713	1.5274	1.2466	1.7936	1.4924	1.25	1.9497	2.3685	2.5848	1.2688	1.6006	2.1373	1.4169	1.8579	2.9096	1.0197	1.7787	1.007
15.5	1.1525	1.4749	1.402	1.1422	0.9289	1.5985	1.8446	2.9398	1.8926	2.09	1.7249	1.3506	1.6075	1.5479	1.2786	1.9028	2.6344	2.6462	1.1666	1.437	2.1052	1.504	1.8092	3.0823	0.9422	1.8467	0.8778
15.6	1.1667	1.5533	1.4514	1.155	0.7806	1.7488	1.6955	2.9348	1.7684	2.2238	1.6127	1.3938	1.5511	1.4241	1.351	1.8858	1.964	2.406	1.1513	1.6711	1.926	1.5995	1.6772	3.2304	1.3608	1.7648	1.0235
15.7	1.2819	1.7691	1.5988	1.0455	0.8283	1.5291	1.6388	2.9283	1.6859	2.2123	1.6787	1.3512	1.602	1.5237	1.2968	1.9657	1.8675	2.3448	1.0888	1.4787	2.0759	1.3181	1.696	3.0077	1.0761	1.8089	1.2517
15.8	1.1348	1.488	1.7101	1.1282	0.9498	1.757	2.0724	2.9071	1.8533	2.2766	1.8544	1.2227	1.688	1.5832	1.2202	1.9815	2.0916	2.3502	1.1732	1.6879	1.821	1.3688	2.0221	2.9366	0.9845	1.7051	0.9705
15.9	1.1196	1.366	1.3031	1.1717	0.8303	1.9593	1.8985	2.9447	1.8652	2.2083	1.8021	1.345	1.6063	1.5606	1.0959	2.0229	2.108	2.5477	1.2418	1.766	1.8867	1.2424	1.7182	3.0966	0.9356	1.6883	0.9614
16	1.2123	1.6737	1.4475	1.3538	0.8604	1.7412	1.8088	3.0629	1.8531	2.1138	1.8572	1.2816	1.5754	1.4138	1.1539	2.0128	2.2621	2.0222	1.2803	1.8633	1.8989	1.2648	1.85	3.146	0.898	1.6488	1.1303
16.1	1.175	1.4384	1.252	1.1942	0.8272	1.5985	2.0737	2.9911	1.7933	2.2914	1.8759	1.2054	1.5599	1.5986	1.2756	1.8823	2.5332	2.1021	1.1434	1.6033	1.816	1.3483	1.8522	3.094	0.9108	1.6485	1.1123
16.2	1.1637	1.3913	1.2529	1.3416	0.9396	1.9516	1.8798	2.9248	1.6899	2.3473	1.6616	1.1668	1.5276	1.5363	1.1075	1.9387	2.295	1.8617	1.243	1.7298	1.8113	1.4363	1.6731	3.0883	0.8935	1.712	0.9558
16.3	1.1997	1.2887	1.2927	1.2277	1.014	1.8751	1.9001	3.1829	2.0079	2.1936	1.6023	1.2265	1.5165	1.3887	1.0199	2.0866	1.9673	1.9202	1.2335	1.6176	2.1246	1.3475	1.6713	2.8773	0.8922	1.5652	1.1397
16.4	1.2241	1.1667	1.4111	1.4261	1.0492	2.02	1.8695	3.2403	1.9332	2.2493	1.6913	1.2509	1.5191	1.5091	1.0647	1.8793	2.2495	2.0149	1.1938	1.7303	1.7869	1.3937	1.7629	2.9994	0.881	1.5954	0.9295
16.5	1.036	1.5534	1.5086	1.3619	0.8872	1.956	2.1534	3.2735	2.3217	2.1923	1.5588	1.2549	1.6336	1.5119	1.1978	1.9184	2.5695	1.8981	1.176	1.7836	1.9902	1.5512	1.6846	2.9025	1.1152	1.8249	0.8914
16.6	1.219	1.4374	1.4303	1.203	1.1015	1.9741	1.8668	3.3014	1.8992	2.2286	1.4779	1.2462	1.6313	1.4368	1.056	1.985	2.1011	2.0187	1.2805	1.7959	2.0959	1.2251	1.7905	3.0857	1.2135	1.6293	1.0296
16.7	1.1202	1.6004	1.5395	1.1614	0.98	2.0524	2.0006	3.5521	1.9597	2.312	1.7693	1.294	1.7733	1.5007	0.9967	1.9227	2.3036	1.9805	1.2563	1.7762	1.9276	1.5014	1.7816	3.0066	1.046	1.8312	1.0343
16.8	1.4664	1.1727	1.5603	1.2597	1.1627	1.9094	1.8514	3.4718	2.0654	2.166	1.6137	1.3476	1.7153	1.4422	1.0191	2.0585	1.9613	2.0021	1.2949	1.783	2.0247	1.4022	1.6015	2.9276	1.2354	1.723	1.144
16.9	1.156	1.2915	1.3733	1.2118	0.7799	1.9637	1.9012	3.4062	2.0343	2.0977	1.6804	1.2367	1.6816	1.482	1.029	2.0706	1.9115	2.0372	1.117	1.7756	2.0386	1.3073	1.8519	2.8662	1.0204	1.6482	1.2144
17	1.2394	1.1133	1.368	1.2299	1.1264	1.6586	1.9801	3.3895	1.9523	2.3079	1.624	1.3896	1.581	1.4736	1.0102	2.01	2.5579	2.2009	1.1425	1.8105	2.315	1.2815	1.9174	2.7149	1.053	1.729	1.1374
17.1	1.4794	1.1255	1.3123	1.1879	0.9012	1.9386	2.1074	3.1059	1.882	2.3496	1.7943	1.3293	1.6392	1.5741	1.0201	1.964	2.3117	2.057	0.9973	1.6084	2.0104	1.4943	1.8479	2.7935	1.0734	1.6466	1.1011
17.2	1.1757	1.2496	1.467	1.2072	1.0912	1.8396	2.1456	3.123	2.1496	2.1804	1.5199	1.2398	1.5798	1.3282	1.1372	1.9876	2.1389	1.8786	1.0863	1.5781	2.0429	1.4528	1.85	3.0798	1.1331	1.8743	1.2099
17.3	1.2878	1.3055	1.5771	1.1872	0.9691	1.9393	2.0784	3.0965	2.0865	2.456	1.5614	1.204	1.5813	1.5208	1.1085	2.0545	2.2021	1.8852	1.0644	1.6559	1.9333	1.5308	1.7788	2.6467	0.9759	1.6817	1.2075
17.4	1.347	1.1605	1.6972	1.3167	0.9973	1.6732	2.0791	3.0785	1.979	2.3326	1.476	1.1453	1.5861	1.4543	1.0189	2.0408	2.1356	1.9273	1.0877	1.6162	1.9055	1.5682	1.8636	2.7352	1.0667	1.928	0.9383
17.5	1.501	1.1941	1.5496	1.3206	1.0891	1.8519	2.0706	3.3179	2.0392	2.3271	1.5992	1.144	1.4432	1.4324	1.231	1.9509	2.2867	1.9559	0.8956	1.5897	2.1456	1.4452	1.8651	2.9092	1.2017	1.8635	1.0117
17.6	1.6462	1.1802	1.5861	1.2143	0.8906	1.7074	2.1682	3.3788	2.1495	2.2338	1.6052	1.2834	1.7192	1.4386	1.1655	1.688	2.1553	2.1223	1.0457	1.4864	1.8651	1.3488	1.9068	3.0083	1.1924	1.9163	1.1773
17.7	1.5687	1.4768	1.6446	1.0882	0.8603	1.8496	2.1097	3.3271	1.9792	2.3048	1.615	1.299	1.5396	1.4438	1.0719	1.9208	2.2543	2.2973	1.1828	1.5991	1.6511	1.3427	2.0721	2.6288	0.9949	1.923	0.966
17.8	1.4218	1.2465	1.2757	1.286	0.8726	1.8713	1.999	3.2047	1.9862	2.2741	1.5508	1.2803	1.4497	1.3958	1.0536	1.8588	2.1476	2.297	1.0538	1.7626	1.9671	1.2616	1.8355	2.5932	1.0696	1.7097	1.0218
17.9	1.3694	1.1557	1.3712	1.2951	0.8921	1.7696	2.057	3.095	1.959	2.2066	1.4913	1.4084	1.6592	1.4448	1.2435	2.1697	2.3541	2.352	1.1597	1.747	1.9972	1.29	1.9798	2.564	0.9384	1.6123	1.1223
18	1.4435	1.4815	1.5331	1.4941	0.8005	1.5594	2.1131	3.1546	2.1705	2.4002	1.4473	1.2264	1.6154	1.5237	1.1928	2.1821	2.3141	2.8908	0.9461	1.8703	2.0414	1.3239	2.0854	2.9938	0.9477	1.6837	1.0923
18.1	1.1681	1.3388	1.5806	1.2646	0.9318	1.9103	2.1015	3.2995	1.9962	2.1865	1.5185	1.4119	1.544	1.3865	1.1488	2.016	2.4711	2.3267	1.1396	1.6998	2.2863	1.314	1.8268	2.8482	1.1067	1.7119	0.9555
18.2	1.233	1.1163	1.638	1.4241	0.8927	1.6857	2.1471	2.8624	2.2196	2.1161	1.4473	1.3348	1.553	1.5121	1.1166	1.8526	2.3132	2.0935	0.8548	1.4615	2.1425	1.2656	1.8542	2.7034	0.9668	1.6834	1.0537
18.3	1.4066	1.1583	1.4806	1.2962	0.8667	1.7126	2.0341	2.8374	2.1948	2.2048	1.5294	1.3032	1.3093	1.4767	1.3536	2.2218	2.0654	2.5027	1.0792	1.5435	2.2077	1.4604	1.7496	2.6631	1.023	1.5328	1.2712
18.4	1.2123	0.9675	1.4375	1.3798	0.8491	1.77	2.1867	3.1847	2.1018	2.1497	1.5087	1.2971	1.3476	1.5799	1.2388	2.1886	1.8989	2.4557	1.1372	1.7189	2.0182	1.2404	1.7987	2.6032	0.9067	1.6834	1.1257
18.5	1.2905	1.2445	1.7894	1.4077	0.8129	1.5411	1.9124	3.1041	2.0862	2.1544	1.6258	1.1497	1.3195	1.7114	1.3862	2.1173	2.1216	2.4334	1.1475	1.7016	2.322	1.536	1.6146	2.7626	1.0184	1.6134	1.2151
18.6	1.3175	1.1717	1.5135	1.573	1.0834	1.7762	1.8506	3.2857	2.0394	2.2572	1.6041	1.166	1.5285	1.5782	1.1804	2.1439	2.0769	2.7705	1.0411	1.7243	2.1454	1.3334	1.6665	3.007	0.9451	1.7219	1.2101
18.7	1.2527	0.9701	1.487	1.914	0.9583	1.7632	1.9772	3.1766	2.015	2.1448	1.5107	1.2556	1.6995	1.5801	1.2524	2.1393	2.0687	2.904	0.818	1.7156	2.3115	1.2489	1.7908	2.9149	1.0278	1.8939	0.9913
18.8	1.2709	1.3355	1.4282	1.7289	0.9467	1.7347	2.0229	3.327	1.8807	2.1836	1.4737	1.2544	1.4915	1.4249	1.3327	2.2978	1.7335	2.8938	1.0354	1.7127	1.9579	1.3342	1.7694	3.0244	0.8638	1.8234	0.9643
18.9	1.4877	1.4676	1.404	1.9226	0.9367	1.718	2.073	3.0445	2.063	2.2637	1.3982	1.3145	1.3774	1.4857	1.2834	2.012	1.8896	2.5921	1.0084	1.7037	2.2749	1.2452	1.857	3.0582	1.0249	1.6932	1.0162
19	1.356	1.1546	1.5536	1.7737	1.0034	1.937	2.146	3.076	1.974	2.1958	1.6716	1.2139	1.6463	1.4605	1.2731	2.4907	1.874	2.7553	1.0058	1.6152	2.0609	1.3696	1.7825	2.9326	1.1469	1.8512	0.884
19.1	1.2941	1.2283	1.5883	1.6771	0.8581	1.8288	2.1032	2.9932	1.9399	2.3217	1.6594	1.236	1.457	1.638	1.2109	2.0516	2.0883	2.8297	0.9098	1.6722	2.2654	1.3577	1.7407	3.1334	0.9982	1.4579	1.1032
19.2	1.2335	1.2341	1.4193	1.5672	0.9853	0.9823	1.4967	0.9576	1.0284	1.2253	1.4318	0.9847	1.8608	1.5477	1.1815	1.2569	1.1568	1.1143	1.1214	1.7806	0.9498	1.5865
19.3	1.3569	1.4145	1.4933	1.5625	0.7828	0.8143	1.3895	1.1869	1.3617	1.086	1.552	0.9514	1.9003	1.4333	1.3485	1.3598	1.3171	1.0412	1.1347	1.89	1.1905	1.4367
19.4	1.2899	1.2402	1.5057	1.6927	0.9781	0.9888	1.3727	0.9755	1.186	1.2942	1.4395	0.8388	1.4338	1.4401	1.582	1.3796	1.1851	0.9107	1.1296	1.9146	1.064	1.3341
19.5	1.3716	1.4526	1.4345	1.6783	1.114	0.8615	1.3351	1.0766	1.1669	1.2145	1.4441	0.9623	1.9142	1.3865	1.6204	1.4166	1.3184	1.0861	1.1465	1.9228	0.9419	1.4436
19.6	1.3719	1.2303	1.5148	1.4365	1.0548	0.9435	1.4256	0.9043	1.1345	1.077	1.5462	1.0657	1.5832	1.4643	1.3358	1.5133	1.2079	1.1128	1.038	1.8179	1.1877	1.5111
19.7	1.2579	1.292	1.2477	1.8571	1.0923	0.6962	1.3075	1.2401	1.211	1.4494	1.4896	1.0103	1.5028	1.2893	1.2985	1.2572	1.2117	1.1733	0.9679	1.9066	1.1127	1.4921
19.8	1.3636	1.1226	1.2847	1.6946	1.06	0.8667	1.3467	1.0799	1.1368	1.1439	1.6579	0.9365	1.6826	1.281	1.2484	1.1793	1.2993	1.3112	1.1692	1.756	1.07	1.5363
19.9	1.4764	1.3389	1.5188	1.8692	0.9286	0.9863	1.3333	1.0623	1.1666	1.2144	1.597	1.0494	1.5431	1.3856	1.27	1.3623	1.2929	0.9811	1.1059	1.7342	1.1637	1.3238
20	1.201	1.4796	1.8137	1.5308	1.0719	0.9454	1.3005	1.0839	1.1208	1.3012	1.6294	1.0801	1.5507	1.2442	1.3381	1.4192	1.4343	1.0953	1.506	1.9364	1.3215	1.5683
20.1	1.311	1.3001	1.6265	1.7881	0.9335	0.9339	1.3309	1.0189	0.9988	1.3453	1.5791	0.9888	1.7565	1.2938	1.3208	1.1464	1.3616	1.0759	1.4061	1.8574	1.2032	1.4277
20.2	1.2961	1.2315	1.6333	1.8613	1.0474	0.794	1.4096	1.0598	1.0633	1.009	1.4548	0.9392	1.4372	1.2276	1.2692	1.3723	1.3189	1.0366	1.3822	1.9991	1.1417	1.3143
20.3	1.3182	1.2079	1.7272	1.6318	0.8802	0.9482	1.3284	1.0022	1.0331	1.0282	1.5458	1.1196	1.609	1.3596	1.2973	1.2448	1.3012	0.9635	1.1902	1.698	1.4198	1.3739
20.4	1.2596	1.4162	1.4934	1.6783	1.021	0.873	1.4353	0.9402	1.1177	0.9579	1.5317	0.9982	1.518	1.332	1.2188	1.2182	1.36	0.9957	1.4059	1.8002	1.2266	1.5565
20.5	1.1604	1.2116	1.6471	1.7129	0.9931	1.0875	1.3567	0.9691	1.1159	1.2818	1.4592	1.0616	1.7099	1.1526	1.2643	1.1978	1.1883	1.1385	1.2599	2.0036	1.362	1.3516
20.6	1.2294	1.7404	1.4926	1.6936	0.9102	0.9656	1.3326	1.1367	1.1006	1.2197	1.3804	1.0189	1.5929	1.1716	1.1783	1.4582	1.2164	1.4119	1.2819	1.9137	1.1622	1.5075
20.7	1.4112	1.3074	1.6292	1.6645	1.0167	0.9702	1.1587	1.0514	1.1732	1.1382	1.284	0.9427	1.6842	1.3162	1.2617	1.3323	1.23	1.0877	1.2594	2.0242	1.2911	1.3723
20.8	1.0559	1.5146	1.8054	1.8582	1.0206	0.8897	1.3184	0.967	0.9906	1.0672	1.3949	0.9966	1.6024	1.0338	1.3359	1.1846	1.217	1.1588	1.2947	1.8501	1.6207	1.6731
20.9	1.1049	1.2889	1.4863	1.7049	0.9465	0.8616	1.3465	1.1492	1.0366	1.4475	1.4281	1.0464	1.696	1.1824	1.4253	1.2265	1.2015	0.9738	1.1356	1.841	1.4967	1.9973
21	1.1173	1.5615	1.7371	1.8968	1.1095	1.0543	1.3665	1.0866	1.0304	1.3846	1.3988	0.9702	1.4372	1.2885	1.2461	1.2356	1.2217	0.935	1.1476	1.8989	1.3175	1.9514
21.1	1.2339	1.5442	1.5619	2.0591	1.0572	1.1213	1.3564	1.1029	1.1064	1.2032	1.3542	1.0889	1.7445	1.0183	1.2413	1.1919	1.2302	0.981	1.1474	1.7783	1.1425	1.6105
21.2	1.1378	1.2801	1.4888	2.0383	0.8727	0.8605	1.3339	0.9811	0.9778	1.0981	1.4504	0.9841	1.7562	1.1475	1.337	1.1951	1.1883	1.0315	1.4088	1.8172	1.3655	1.3977
21.3	1.0519	1.1504	1.5777	1.7498	1.0514	0.9473	1.3855	0.8872	1.0502	1.153	1.4546	0.8628	1.8798	1.1757	1.3413	1.2547	1.2032	1.1392	1.3745	1.824	1.1283	1.6352
21.4	1.0883	1.1851	1.6982	1.6761	1.0353	0.9216	1.3841	1.0084	1.0498	1.5043	1.4391	1.0141	1.7978	1.1172	1.429	1.1637	1.1098	1.0776	1.3913	1.9194	1.3729	1.302
21.5	1.1564	1.3161	1.4118	1.6783	0.8605	1.0897	1.3578	0.9935	0.9903	1.3536	1.3806	0.9861	1.9068	1.1123	1.3396	1.2213	1.1649	0.9502	1.3423	1.7696	1.1495	1.289
21.6	1.3691	1.332	1.464	1.8022	0.8402	1.1417	1.4794	1.1391	1.046	1.3167	1.3597	0.9686	1.7386	1.0484	1.3573	1.1096	1.0968	1.1178	1.2512	1.9837	1.2583	1.6026
21.7	1.1995	1.5543	1.563	1.7838	0.9199	1.1323	1.2964	1.1336	1.0663	1.6907	1.5141	0.9738	1.5392	1.2268	1.3814	1.3039	1.1698	1.0235	1.3533	1.9486	1.1552	1.3927
21.8	1.2511	1.2739	1.4517	1.9562	0.7936	1.0485	1.2516	1.1268	1.0422	1.2802	1.4541	0.8986	1.6701	1.1797	1.3546	1.134	1.2258	1.1923	1.3859	1.9323	1.2347	1.5472
21.9	1.1923	1.4397	1.6359	1.9224	0.8221	0.9875	1.4472	1.0873	1.2323	1.223	1.398	0.9101	1.6871	1.3654	1.3205	1.21	1.2543	1.05	1.5671	1.913	1.4253	1.3257
22	1.1262	1.425	1.6629	1.6185	0.8898	0.9642	1.3442	1.2834	1.1775	1.3126	1.2914	0.9745	1.6685	1.2174	1.3006	1.3727	1.2319	0.9064	1.509	1.8207	1.4008	1.4268
22.1	1.2071	1.2147	1.5921	1.6908	0.8231	1.2673	1.3383	0.9539	1.1145	1.1475	1.4081	1.0503	1.5538	1.2592	1.5772	1.3088	1.4091	0.7988	1.3871	1.8602	1.4551	1.5879
22.2	1.1617	1.2427	1.2786	1.7059	0.9675	1.0339	1.2531	1.3122	1.2723	1.0832	1.359	1.0222	1.7821	1.2372	1.4483	1.3117	1.4684	0.9641	1.3275	1.8663	1.2588	1.4176
22.3	1.0754	1.4305	1.4325	1.8882	0.8593	1.297	1.2639	1.1493	1.1271	1.098	1.454	1.1318	1.777	1.2854	1.6014	1.3199	1.3188	1.3228	1.4742	2.1288	1.3884	1.4659
22.4	1.1977	1.3795	1.3126	2.022	0.8816	1.2346	1.2225	1.292	1.1205	1.1636	1.3985	0.9645	1.9228	1.3035	1.2814	1.1628	1.2117	1.1833	1.3586	1.9703	1.3145	1.4422
22.5	1.31	1.4309	1.4241	1.7874	0.973	1.182	1.1717	1.1002	0.9691	1.6806	1.3727	0.9066	2.0124	1.3499	1.2973	1.0075	1.2584	1.2271	1.4336	1.8649	1.2158	1.6035
22.6	1.2479	1.392	1.5723	1.6959	0.8533	1.2189	1.4275	1.3759	0.9616	1.3927	1.2867	0.9673	1.9559	1.4337	1.4204	1.2932	1.3215	1.011	1.3207	1.8858	1.1776	1.4798
22.7	1.5357	1.3233	1.5723	1.4702	0.9365	1.2342	1.3118	1.3398	1.1647	1.4123	1.5364	1.0857	2.0161	1.1662	1.3396	1.245	1.3505	1.1694	1.4266	2.0007	1.199	1.5209
22.8	1.5636	1.3341	1.6231	1.4733	1.0194	1.1656	1.2561	1.2791	0.9576	1.2958	1.5017	1.0659	1.8929	1.1246	1.3384	1.196	1.4462	1.2845	1.3853	2.0547	1.1853	1.4135
22.9	1.4227	1.348	1.7136	1.6549	0.9681	1.2394	1.3829	1.2837	0.972	1.3633	1.2888	1.01	2.0144	1.1939	1.2289	1.1339	1.3823	0.9677	1.3937	2.0345	1.6352	1.4169
23	1.3248	1.6053	1.3856	1.6329	1.0038	1.2899	1.2936	1.0867	1.0564	1.3593	1.7717	0.8727	1.7361	1.2667	1.2196	1.2875	1.3165	1.0104	1.1658	1.9104	1.3123	1.3436
23.1	1.0627	1.5438	1.5062	1.4959	0.9544	1.2185	1.3229	1.1125	0.9744	1.3819	1.3997	0.9067	1.8254	1.3233	1.2736	0.9317	1.4324	1.2989	1.2559	2.2313	1.3084	1.5847
23.2	1.2198	1.395	1.3882	1.4085	1.018	1.262	1.3322	0.9322	1.0709	1.3053	1.3982	0.921	1.9594	1.2037	1.2309	1.3091	1.5597	1.0431	1.2162	1.8578	1.3461	1.5936
23.3	1.2719	1.3496	1.3254	1.7462	1.1231	1.5215	1.3524	1.1337	1.0215	1.4452	1.5793	0.8711	1.8308	1.2787	1.1956	1.1976	1.3647	1.0524	1.2081	1.9664	1.4691	1.4309
23.4	1.243	1.2351	1.4302	1.8405	0.9624	1.4247	1.3354	1.0686	1.0571	1.2494	1.5484	0.8203	1.7606	1.2844	1.1318	1.4216	1.385	0.9888	1.2	1.9691	1.1715	1.3029
23.5	1.1281	1.4427	1.2844	1.7893	1.0369	1.6489	1.2411	0.8683	0.988	1.3181	1.5159	1.0211	1.8428	1.2404	1.2684	1.1281	1.47	1.164	1.3558	1.9684	1.2901	1.2009
23.6	1.2807	1.3893	1.2182	2.032	1.0426	1.5287	1.2963	1.1986	1.0177	1.3544	1.4856	0.867	1.6572	1.1599	1.3638	1.3832	1.4286	1.3376	1.4557	1.8114	1.0532	1.7391
23.7	1.3237	1.4932	1.3087	1.7484	1.0427	1.4583	1.2997	1.0354	1.0769	1.1492	1.6692	1.03	1.9317	1.2221	1.3102	1.5062	1.3924	1.1802	1.3312	1.8238	1.0746	1.6547
23.8	1.4175	1.354	1.3022	1.6819	0.988	1.5729	1.4128	1.0774	1.0069	1.2734	1.5187	1.0475	1.7368	1.0476	1.1518	1.3375	1.4246	1.1135	1.2855	1.9153	1.1495	1.5755
23.9	1.4493	1.4734	1.3807	1.8737	1.0008	1.4229	1.1164	0.9441	1.1608	1.2726	1.4154	0.9589	1.8429	1.2801	1.4128	1.3749	1.2254	0.9447	1.1579	1.681	1.1521	1.7174
24	1.5458	1.1736	1.3626	1.9306	0.9973	1.5385	1.1945	1.1422	1.0957	1.3026	1.4767	1.0058	1.6811	1.1262	1.3247	1.3096	1.388	1.2317	1.1899	1.9742	1.1556	1.4863
24.1	1.5187	1.3754	1.4097	1.8416	1.0734	1.6499	1.22	1.1712	1.0288	1.4806	1.5835	1.0526	1.7673	1.2197	1.1968	1.5231	1.5077	1.1035	1.1764	1.909	1.2234	1.4506
24.2	1.5156	1.479	1.2689	1.7549	1.1019	1.5381	1.3193	1.0271	1.1278	1.1927	1.6183	1.0323	1.9183	1.3613	1.2713	1.3101	1.3821	1.1244	1.1977	1.8375	0.9901	1.7451
24.3	1.3409	1.4746	1.1954	1.9489	1.0379	1.4583	1.3158	1.2189	1.3156	1.3042	1.6333	1.1245	2.1562	1.2503	1.3458	1.2491	1.338	1.1273	1.3837	2.0383	1.051	1.545
24.4	1.5325	1.3418	1.369	1.8309	1.1179	1.9692	1.172	1.1793	1.2769	1.2765	1.5039	1.1069	2.0494	1.3381	1.3561	1.1698	1.2771	1.1551	1.5792	2.1915	1.1343	1.4607
24.5	1.5403	1.2016	1.4188	1.9199	1.0119	1.837	1.3539	1.2524	1.192	1.161	1.558	1.2191	1.8099	1.4844	1.3642	1.035	1.3497	0.9777	1.1897	1.8479	1.1817	1.4013
24.6	1.6227	1.2625	1.4845	1.7053	1.1796	1.6716	1.2404	1.2108	1.12	1.0328	1.701	1.0767	1.7464	1.5116	1.4216	1.2667	1.2402	1.2045	1.3638	1.9106	1.1175	1.4871
24.7	1.5194	1.4976	1.4377	1.7196	1.1192	1.4842	1.3793	1.1044	1.2606	1.1606	1.6645	0.9474	1.896	1.6022	1.3745	1.3224	1.4774	1.0494	1.2151	1.8214	1.2649	1.3473
24.8	1.3612	1.1443	1.3664	1.6592	1.032	1.5596	1.3006	1.2621	1.2345	1.0462	1.5475	1.1667	2.1171	1.616	1.0857	1.338	1.4257	1.2287	1.125	1.8043	1.3023	1.2336
24.9	1.4489	1.2657	1.4005	1.8641	1.0142	1.5503	1.4215	1.0429	1.2601	1.3507	1.7365	1.1003	1.8968	1.6615	1.2334	1.3798	1.5657	1.1601	0.9707	1.8077	1.2048	1.5612
25	1.3768	1.284	1.2519	1.625	1.0224	1.5624	1.3475	1.2734	1.3614	1.2075	1.6537	1.0878	2.1531	1.6577	1.1089	1.3886	1.3398	1.1253	1.0813	1.9408	1.165	1.263
25.1	1.3487	1.4849	1.2793	1.7033	1.055	1.3144	1.3617	1.1684	1.3403	1.0269	1.6051	1.0221	2.0985	1.8279	1.1195	1.3166	1.4064	0.9187	0.9693	1.7915	1.0189	1.8285
25.2	1.519	1.5187	1.0909	1.5743	0.9541	1.6997	1.2939	1.4361	1.2433	1.1726	1.7616	1.2872	1.9951	1.5778	1.191	1.3746	1.5476	0.9639	1.0127	1.7984	1.1925	1.5277
25.3	1.2571	1.4077	1.2827	1.5614	0.9809	1.8704	1.331	1.1135	1.2898	1.1512	1.6924	1.1355	1.7712	1.3935	1.2468	1.3185	1.4988	1.0446	1.1162	1.6915	1.2305	1.2368
25.4	1.3294	1.2085	1.4636	1.7438	0.8973	1.7398	1.4121	0.8957	1.3338	1.095	1.9789	1.1842	1.6832	1.4887	1.1234	1.3406	1.3804	1.0513	1.2517	1.6988	1.2239	1.493
25.5	1.4603	1.1903	1.3663	1.8109	0.9336	1.5972	1.4533	1.0015	1.2794	0.9847	1.9	1.0381	1.6918	1.3888	1.1246	1.2826	1.4699	0.913	1.0966	1.6282	1.1385	1.4583
25.6	1.6002	1.3477	1.4297	1.8099	0.8177	1.8031	1.3441	1.1943	1.357	1.1501	1.8068	1.0705	1.8369	1.5616	1.3406	1.256	1.2427	0.9669	1.0845	1.7618	1.1583	1.4551
25.7	1.4833	1.6505	1.4192	2.0968	0.7651	1.698	1.2637	1.0445	1.3959	1.1443	1.7184	1.2685	1.8756	1.6364	1.2052	1.4087	1.4322	0.8922	1.2005	1.771	1.1312	1.3419
25.8	1.5006	1.3145	1.4312	2.0548	0.8443	1.5621	1.4811	1.225	1.2135	1.1838	1.8936	1.143	2.091	1.3166	1.2287	1.3874	1.4183	0.8446	1.3107	1.7555	1.1238	1.304
25.9	1.3114	1.386	1.3812	1.7492	0.8259	1.4559	1.3621	1.1936	1.2621	1.1715	1.9277	1.0533	2.1663	1.5301	1.3347	1.4739	1.4287	1.0425	1.2441	1.5804	1.2859	1.1308
26	1.3307	1.2342	1.4405	1.4983	0.6979	1.4481	1.5121	1.1039	1.1303	0.9975	1.8694	1.1595	2.0157	1.6079	1.1098	1.5292	1.3397	1.0948	1.2186	1.7127	1.1971	1.2936
26.1	1.1995	1.2253	1.331	1.6475	0.9832	1.3726	1.7855	1.2676	1.2914	1.1215	1.644	1.1667	2.1016	1.5763	1.1754	1.4896	1.4041	0.9619	1.1153	1.8323	1.2441	1.4274
26.2	1.3718	1.2756	1.5371	1.5628	0.8397	1.488	1.4943	1.0778	1.2817	1.1851	1.5861	1.2555	1.7973	1.3813	1.2989	1.5329	1.4001	1.0282	1.2362	1.7826	1.3553	1.2444
26.3	1.3626	1.3678	1.5763	1.7366	0.8356	1.5291	1.4075	1.0555	1.4651	0.9965	1.5593	0.9999	2.0915	1.5389	1.291	1.4225	1.2257	1.0776	1.221	1.6083	1.2937	1.3756
26.4	1.4929	1.215	1.5441	1.9446	0.9138	1.3633	1.255	1.1018	1.3217	1.1935	1.6993	1.0119	1.8251	1.6053	1.0899	1.3776	1.3622	0.8205	1.2396	1.6922	1.4622	1.4946
26.5	1.3514	1.0809	1.4693	1.8503	0.8342	1.4919	1.427	1.0556	1.464	1.2371	1.5382	1.2134	1.8959	1.5637	1.3061	1.3263	1.3846	0.9083	1.4228	1.8364	1.5146	1.5456
26.6	1.2772	1.1482	1.6173	1.7682	0.8368	1.2864	1.4699	1.0402	1.4531	1.0173	1.6008	1.0795	1.8493	1.545	1.1837	1.3954	1.4523	1.0095	1.2402	1.7976	1.4944	1.5028
26.7	1.3111	1.1863	1.3488	2.0707	0.8488	1.5228	1.3155	1.2572	1.415	1.1301	1.5421	1.2072	1.8908	1.6937	1.284	1.3729	1.4782	1.021	1.2076	1.6175	1.5884	1.4266
26.8	1.324	1.2015	1.4846	1.9505	0.7013	1.3399	1.4188	1.261	1.381	1.0871	1.5646	1.1905	1.8753	1.6085	1.2695	1.2836	1.4761	0.8958	1.1201	1.8032	1.3985	1.1644
26.9	1.3402	1.2991	1.4801	1.746	0.9306	1.3932	1.4557	0.9125	1.3339	1.1469	1.7214	1.3171	1.8237	1.5628	1.1295	1.3409	1.3387	0.9959	1.2524	1.828	1.407	1.1114
27	1.39	1.4828	1.4093	2.1002	0.7133	1.6555	1.3511	0.9848	1.3795	1.1362	1.5479	1.0317	1.7403	1.6293	1.3384	1.4933	1.3578	0.8894	1.113	1.7657	1.2248	1.4091
27.1	1.3573	1.487	1.491	1.7282	0.8014	1.5132	1.6061	1.0363	1.5426	1.1148	1.6103	1.1744	1.9431	1.4256	1.4748	1.7214	1.4107	0.9271	1.3045	1.843	1.1297	1.419
27.2	1.236	1.5001	1.373	1.6595	0.7565	1.506	1.4345	1.1314	1.3534	1.4247	1.5176	1.1175	1.9674	1.4125	1.2171	1.3567	1.5409	0.9878	1.2962	1.8448	1.0635	1.4911
27.3	1.1497	1.8032	1.3878	2.2732	0.7278	1.4353	1.3808	0.9338	1.3782	1.0909	1.8253	0.9774	1.886	1.4844	1.2954	1.4635	1.4773	0.9162	1.2529	1.9399	1.0714	1.4121
27.4	1.325	1.4743	1.5147	2.2345	0.9025	1.5682	1.3459	1.1557	1.3843	1.3351	1.7215	1.1899	1.7213	1.3924	1.1312	1.4017	1.5494	0.9574	1.1833	1.8642	1.2851	1.578
27.5	1.3715	1.5283	1.5799	2.194	0.9919	1.5445	1.2555	1.2278	1.4959	1.2188	1.6682	1.377	1.9514	1.704	1.2323	1.4059	1.5166	0.9319	1.2873	1.7607	1.0837	1.4596
27.6	1.3011	1.6776	1.3838	1.9798	0.8613	1.4769	1.3886	0.9471	1.25	1.2126	1.7387	1.0416	1.897	1.6649	1.2895	1.4055	1.7069	0.9231	1.318	1.9125	1.3505	1.5273
27.7	1.4065	1.5386	1.5007	2.3816	0.8404	1.6815	1.3401	1.1973	1.1724	1.2045	1.7823	1.0574	2.1049	1.6178	1.4454	1.4821	1.5006	0.9736	1.4298	1.8344	1.3427	1.4568
27.8	1.1231	1.4449	1.6934	2.5647	0.7451	1.5708	1.4823	1.2398	1.2709	1.199	1.7141	1.0218	2.0116	1.4557	1.5042	1.519	1.4656	0.8919	1.0906	1.7791	1.2261	1.4267
27.9	1.3572	1.4044	1.4439	2.1569	0.8702	1.4637	1.2584	1.0602	1.238	1.0864	1.6336	0.8881	1.908	1.5814	1.3744	1.5894	1.674	0.9159	1.1616	1.8775	1.2317	1.4934
28	1.2778	1.6754	1.4851	2.2266	0.9484	1.4537	1.4442	0.98	1.1437	1.2791	1.6655	1.0102	1.8544	1.434	1.3719	1.6911	1.9178	0.8578	1.0289	1.867	1.1253	1.3283
28.1	1.3528	1.6328	1.4945	1.9408	0.886	1.4393	1.189	1.0033	1.3199	1.4447	1.719	1.0284	1.5255	1.3862	1.2316	1.4226	1.5306	0.8525	1.0613	1.76	1.2518	1.3552
28.2	1.5012	1.626	1.6255	2.171	0.9814	1.3425	1.1811	1.1454	1.2901	1.1722	1.8656	0.9341	1.8225	1.4606	1.3766	1.5783	1.4626	1.0163	1.1521	1.6715	1.0382	1.5173
28.3	1.1907	1.5658	1.4038	2.1353	0.7862	1.4632	1.2326	1.0427	1.3	1.2315	1.7448	1.0188	1.8131	1.3891	1.4903	1.5218	1.3122	0.9418	1.1352	1.7453	1.2782	1.4562
28.4	1.363	1.4376	1.3746	1.7074	0.981	1.3886	1.2783	1.2717	1.2884	1.2004	1.5747	0.9008	1.7794	1.4686	1.4114	1.4363	1.3406	0.9504	1.1114	1.7861	1.2906	1.4906
28.5	1.3154	1.2541	1.4092	2.2675	0.8095	1.813	1.299	1.0505	1.4376	1.228	1.7176	1.0017	1.8504	1.4658	1.4997	1.456	1.4787	0.8158	1.0057	1.8769	1.1357	1.4283
28.6	1.3455	1.3539	1.5802	1.9595	0.7438	1.3567	1.4025	1.0827	1.249	1.1731	1.731	0.945	2.1852	1.5509	1.3176	1.5112	1.3502	0.9949	1.1719	1.9088	1.1891	1.302
28.7	1.3208	1.2813	1.4521	2.2438	1.1145	1.7166	1.2923	1.3488	1.1794	1.2412	1.6514	0.935	1.9967	1.2178	1.2775	1.2908	1.2306	0.9135	1.0204	1.9116	1.1129	1.3732
28.8	1.4208	1.3975	1.4031	2.2722	0.7881	1.5931	1.3028	1.1275	1.2867	1.1911	1.695	1.1104	1.7048	1.5001	1.2985	1.3301	1.5219	1.0493	1.0314	2.0654	1.0654	1.5596
28.9	1.2714	1.1912	1.367	2.1377	0.7153	1.6626	1.3656	1.0942	1.2156	1.377	1.603	1.2125	1.935	1.3884	1.2802	1.2333	1.5949	0.9853	0.9851	1.8987	1.1051	1.3888
29	1.2429	1.2563	1.6184	1.9694	0.7523	1.4293	1.2567	1.2257	1.387	1.4044	1.6565	0.9909	1.8855	1.3731	1.3971	1.244	1.3592	0.8638	1.0215	1.8056	1.1239	1.3707
29.1	1.3323	1.1475	1.5416	2.2211	0.7943	1.563	1.263	1.2386	1.2238	1.1924	1.6823	1.069	1.8335	1.5103	1.3557	1.4731	1.4188	0.8903	0.9109	1.7959	1.2034	1.2253
29.2	1.465	1.4124	1.507	1.9864	0.7272	1.2419	1.1962	1.2563	1.2582	1.5613	1.6795	1.0533	1.9164	1.6439	1.3133	1.4942	1.4659	0.8112	1.0179	1.9093	0.971	1.2832
29.3	1.3	1.3565	1.5381	2.2636	0.7187	1.5794	1.2718	1.01	1.4239	1.8565	1.5497	1.3263	1.6173	1.348	1.4115	1.3729	1.3283	0.7869	1.0771	1.9212	1.1122	1.3407
29.4	1.4541	1.2012	1.686	2.4516	0.7489	1.5799	1.4017	1.3422	1.5425	1.4774	1.7614	1.1901	1.7482	1.3913	1.1774	1.4526	1.3586	1.0991	0.9425	1.9047	1.4012	1.331
29.5	1.4175	1.1886	1.7731	2.5474	0.8369	1.6753	1.2732	1.0091	1.3741	1.5617	1.8191	1.2654	1.6899	1.4948	1.163	1.3612	1.3879	0.9923	1.0864	1.7669	1.3582	1.1133
29.6	1.4519	1.2746	1.647	2.2198	0.8496	1.8901	1.2635	1.289	1.4098	1.3225	1.5723	1.1104	1.7164	1.3748	1.1795	1.5173	1.3523	1.1638	1.0835	1.7956	1.2061	1.2603
29.7	1.376	1.4147	1.7606	2.2576	0.7982	1.8667	1.3527	1.183	1.3945	1.6699	1.8656	0.942	1.9371	1.4084	1.1133	1.5015	1.4682	0.8231	1.1577	1.8449	1.2833	1.3994
29.8	1.3025	1.3682	1.7442	1.8886	0.8153	1.5442	1.2264	1.2781	1.368	1.2672	1.7662	1.0834	1.8912	1.4182	1.1834	1.3737	1.4971	0.871	1.0801	1.8602	1.3138	1.4676
29.9	1.4196	1.2954	1.856	2.0577	0.7693	1.4895	1.1539	1.0395	1.3106	1.3497	1.7113	1.0641	2.0001	1.3563	1.2406	1.387	1.5028	0.9757	1.0969	1.897	1.195	1.3482
30	1.2826	1.2901	1.6416	2.2574	0.7692	1.5792	1.2703	1.1397	1.4317	1.1364	1.7344	0.9945	1.9381	1.2711	1.3589	1.4316	1.3522	0.8772	1.1067	1.8934	1.0717	1.3074
30.1	1.323	1.4029	1.6751	2.1295	0.6942	1.7898	1.2839	1.1913	1.4293	0.8717	1.7201	1.3094	1.8729	1.4488	1.515	1.476	1.4545	0.8807	1.2035	1.9861	1.0754	1.4456
30.2	1.4267	1.2906	1.6169	1.8811	0.754	1.7916	1.2233	1.1307	1.3493	0.9679	1.5617	0.9205	1.8178	1.4652	1.1715	1.3761	1.4046	0.8903	1.0068	1.851	1.2409	1.4684
30.3	1.5844	1.2892	1.5086	2.2355	1.1439	1.843	1.31	1.0381	1.2995	0.8535	1.7881	0.9223	1.9001	1.4837	1.323	1.5344	1.2595	0.8485	1.206	1.8464	1.1142	1.6286
30.4	1.5755	1.3337	1.616	2.1252	0.8755	1.8995	1.327	1.174	1.3054	0.951	1.8237	1.1956	1.7739	1.4896	1.3514	1.3398	1.519	0.7916	1.0041	1.8715	1.1616	1.4491
30.5	1.6101	1.3505	1.3572	2.4539	0.8164	1.8695	1.2664	1.2403	1.6452	0.8993	1.732	1.0065	1.9386	1.4207	1.4175	1.504	1.654	0.8959	1.0095	1.8056	1.0743	1.6138
30.6	1.536	1.242	1.4171	2.6082	0.8429	1.8772	1.2659	1.3332	1.2927	1.1023	1.8599	0.8983	1.7873	1.271	1.3033	1.4086	1.6897	1.0333	1.0762	1.8405	1.1894	1.3434
30.7	1.7384	1.4052	1.5908	1.8961	0.8402	1.8735	1.1348	1.3028	1.3046	1.1402	1.6133	0.9281	1.7417	1.4538	1.2406	1.4057	1.6668	1.0109	1.1485	1.8672	1.1493	1.4269
30.8	1.6044	1.3543	1.7634	1.9629	0.8731	1.5232	1.2099	1.0839	1.3186	1.3261	1.8497	0.9076	1.7903	1.5634	1.1411	1.4395	1.5481	1.0701	1.098	1.9461	0.9647	1.4018
30.9	1.6177	1.2512	1.5575	1.7999	0.7867	1.5698	1.3907	1.2511	1.4501	1.3036	1.6721	0.9446	1.8936	1.5029	1.2568	1.392	1.4409	1.2039	0.9367	1.8902	1.0436	1.1979
31	1.6676	1.3116	1.484	1.6532	0.774	1.5942	1.3717	1.3067	1.3209	1.3967	1.7019	0.9608	1.7879	1.4947	1.3486	1.5241	1.5738	1.0728	0.9371	1.8283	1.0509	1.3717
31.1	1.6599	1.3189	1.6897	1.9407	0.8717	1.6945	1.2623	1.2734	1.2704	1.7032	1.7294	1.062	1.8469	1.5258	1.1828	1.3714	1.6464	1.0515	0.9399	1.9038	1.2862	1.207
31.2	1.4884	1.2549	1.5866	2.3532	0.982	1.5493	1.1211	1.1931	1.374	1.6432	1.7392	1.0915	1.8258	1.4963	1.2665	1.4504	1.6088	1.0932	0.967	1.8309	1.1452	1.0783
31.3	1.6768	1.3472	1.3928	2.7365	0.8962	1.7242	1.1639	1.0418	1.2894	1.5044	1.7211	1.0448	1.6978	1.3981	1.2193	1.2805	1.6716	1.086	1.0258	1.7482	0.9276	1.2181
31.4	1.8589	1.3421	1.5196	2.624	0.8234	1.6247	1.0806	1.0951	1.2709	1.2944	1.7713	0.9757	1.8427	1.4905	1.3604	1.3257	1.6357	1.1293	1.007	1.9019	1.038	1.4278
31.5	1.7747	1.3524	1.4211	2.552	0.7715	1.5986	1.2592	1.305	1.3636	1.3377	1.753	0.9093	1.6182	1.4451	1.3804	1.426	1.4384	0.9033	1.1416	1.6812	1.1757	1.1985
31.6	1.7187	1.3415	1.4763	2.3647	0.8034	1.9481	1.3308	1.0168	1.4144	1.4634	1.8367	1.0017	1.9864	1.4856	1.3319	1.3826	1.5665	1.0906	0.9223	1.9171	0.9489	1.251
31.7	1.4918	1.4262	1.4768	2.4058	0.7293	1.7043	1.1792	1.1314	1.4677	1.5843	1.8521	0.8993	1.7663	1.7756	1.426	1.5619	1.548	1.116	1.1808	1.8613	0.9958	1.3263
31.8	1.5713	1.3118	1.4617	2.4056	0.7738	1.772	1.0966	1.2147	1.2258	1.5534	1.6268	0.9186	2.1158	1.7708	1.2711	1.5096	1.3296	0.9248	1.313	1.7787	0.9778	1.1127
31.9	1.5385	1.5551	1.7241	2.7017	0.7481	1.6563	1.1512	1.3347	1.3185	1.3078	1.7004	0.9764	1.8671	1.4251	1.4487	1.4485	1.4217	0.9826	1.3443	1.8238	0.8856	1.3427
32	1.8567	1.6324	1.8849	2.8827	0.8873	1.7127	1.3439	1.0131	1.2625	1.2739	1.6017	0.8925	1.9916	1.4203	1.222	1.4774	1.6106	0.9829	1.2355	1.8461	0.8056	1.2658
32.1	1.6669	1.6459	1.7575	2.3976	0.6882	1.8335	1.2262	1.1328	1.3746	1.4472	1.5612	1.0738	1.915	1.495	1.5096	1.4322	1.6667	1.2402	1.2108	1.7697	0.8929	1.2476
32.2	1.6542	1.472	1.6036	2.6575	0.8281	1.722	1.4038	1.1963	1.4749	1.1465	1.5266	1.0775	1.9084	1.545	1.2437	1.7299	1.5026	1.0653	1.1403	1.7548	0.862	1.2397
32.3	1.5981	1.1686	1.7884	2.7072	0.7892	1.9442	1.322	1.3984	1.3066	1.1892	1.6742	1.0154	1.8336	1.5156	1.2976	1.3852	1.7351	0.8604	1.7785	1.7042	0.7439	1.3704
32.4	1.6433	1.5004	1.7059	2.6979	0.6466	1.9716	1.3058	1.2534	1.5021	1.1314	1.6612	0.9635	2.0603	1.4504	1.2838	1.5319	1.6913	1.1604	1.5662	1.7386	0.9323	1.5768
32.5	1.5693	1.4926	1.8956	2.6927	0.8272	1.6419	1.335	1.1011	1.6093	1.1018	1.679	1.1201	1.902	1.4618	1.3561	1.5244	1.6747	0.7496	1.3281	1.7777	1.1146	1.4879
32.6	1.6154	1.4218	1.5639	2.9384	0.7727	1.9108	1.3131	1.1061	1.4292	1.2747	1.8658	0.9877	1.858	1.284	1.5294	1.5336	1.5193	1.0617	1.248	1.6568	1.1759	1.469
32.7	1.696	1.5027	1.6396	2.5727	1.0699	1.8677	1.3296	1.3389	1.3933	1.4172	1.6159	1.1235	1.7408	1.3564	1.234	1.4743	1.679	0.862	1.2423	1.6617	0.9239	1.3026
32.8	1.6223	1.5706	1.6706	2.6396	1.0234	1.7954	1.3272	1.2343	1.2862	1.5535	1.7289	1.3876	1.7848	1.5608	1.4128	1.5629	1.4498	0.7723	1.1218	1.7679	1.0144	1.2777
32.9	1.4733	1.6746	2.0768	2.7572	0.7517	1.7598	1.4908	1.3622	1.2813	1.3195	1.8044	1.3523	1.9013	1.5413	1.2867	1.5521	1.4705	0.8974	1.2578	1.6234	1.0789	1.4299
33	1.5833	1.6623	2.2888	2.6834	0.9048	1.7513	1.4009	1.1604	1.3165	1.4946	1.8679	1.2368	1.9603	1.6221	1.2852	1.5427	1.4757	0.9942	1.4239	1.7427	1.0596	1.4181
33.1	1.4789	1.7126	1.8541	2.2236	0.8648	1.7093	1.2989	1.3813	1.4137	1.5546	1.6582	1.0383	1.7867	1.4751	1.3659	1.5072	1.5413	1.0291	1.4994	1.6264	0.9164	1.3756
33.2	1.6431	1.3362	1.8218	2.261	0.8604	1.9333	1.3035	1.3548	1.406	1.5273	1.69	1.1747	1.9229	1.5014	1.3695	1.3351	1.6156	0.9269	1.2593	1.6485	1.034	1.3397
33.3	1.412	1.3801	1.4911	2.4686	0.7459	1.796	1.2917	1.1469	1.4077	1.3116	1.7077	1.3382	1.8451	1.4418	1.1946	1.6473	1.4576	1.0484	1.4604	1.7712	1.0997	1.227
33.4	1.571	1.6359	1.4427	2.8652	0.8738	1.7743	1.3693	1.445	1.2742	1.3901	1.6731	1.1978	1.8576	1.4728	1.3168	1.4453	1.7098	0.9825	1.2869	1.5633	1.0278	1.1266
33.5	1.5115	1.5123	1.5092	2.44	0.8865	1.7633	1.3534	1.2299	1.4592	1.122	1.914	1.106	1.6725	1.4668	1.3974	1.7543	1.7057	0.9665	1.064	1.8241	1.0028	1.4166
33.6	1.6301	1.3443	1.6152	2.7797	0.8078	1.8169	1.2892	1.1147	1.5057	1.2318	1.5116	0.9947	1.8205	1.3583	1.2734	1.6126	1.6298	1.0825	1.1158	1.832	0.9341	1.3388
33.7	1.5376	1.3515	1.571	2.576	1.0459	1.482	1.2384	1.2297	1.4618	1.3641	1.6929	0.9799	1.628	1.41	1.2336	1.7299	1.6157	1.0842	1.1861	1.6301	0.8648	1.3696
33.8	1.511	1.3399	1.6165	2.4103	0.9188	1.5911	1.2849	1.1314	1.3938	1.5984	2.0014	1.0873	1.8192	1.7339	1.2906	1.8854	1.6985	1.118	1.1222	1.8092	0.8868	1.5429
33.9	1.5128	1.3548	1.5478	2.5778	0.8866	1.5433	1.2962	1.377	1.409	1.2819	1.5279	0.9501	1.7091	1.4824	1.1876	1.9758	1.6335	1.1534	1.1207	1.6218	0.8784	1.6506
34	1.584	1.4014	1.5108	2.1963	0.7719	1.4142	1.232	1.276	1.369	1.239	1.6646	0.9534	1.7966	1.4797	1.513	2.0886	1.7182	0.9802	1.0337	1.7206	0.9154	1.3531
34.1	1.5837	1.4646	1.5196	2.4229	0.99	1.395	1.1658	1.3229	1.5817	1.1156	1.6945	1.0611	1.8749	1.3536	1.3114	2.0594	1.6804	1.1197	1.1544	1.8369	0.9713	1.2777
34.2	1.6702	1.3658	1.4714	2.3588	0.908	1.476	1.3305	1.4009	1.5375	1.0224	1.9757	0.8591	1.6382	1.5358	1.2747	1.9948	1.579	1.0584	1.0389	1.8133	1.1156	1.3786
34.3	1.5397	1.3952	1.604	2.6929	1.0167	1.4903	1.2407	1.4296	1.5596	0.7911	1.7346	1.1707	1.7912	1.5342	1.2525	1.9996	1.6633	1.2505	1.1866	1.9511	0.9104	1.6553
34.4	1.5122	1.4586	1.5452	2.8634	1.1685	1.4883	1.359	1.5552	1.6263	1.4034	1.8256	0.9916	1.7539	1.5544	1.2247	2.1328	1.5477	0.9028	1.1839	1.9474	1.0977	1.3915
34.5	1.617	1.4462	1.4349	2.4515	0.9117	1.5472	1.4679	1.3921	1.3602	1.0643	1.6489	1.0547	2.0402	1.3956	1.3268	2.0774	1.6114	0.9851	1.1362	1.9548	0.987	1.6788
34.6	1.4884	1.4734	1.6408	2.4487	0.9519	1.596	1.4227	1.1697	1.6008	0.9273	1.8209	1.1168	1.5964	1.7382	1.1968	2.1578	1.5412	1.1443	1.3189	1.8673	0.9343	1.3611
34.7	1.5686	1.2533	1.5817	2.3233	1.0266	1.675	1.4245	1.3495	1.4677	0.991	1.8315	0.9024	1.48	1.3425	1.196	1.7808	1.6748	1.0476	1.3687	1.8168	1.1964	1.4918
34.8	1.763	1.2311	1.4888	2.5447	0.9598	1.8117	1.3575	1.3953	1.4177	1.3841	1.8146	0.8457	1.7087	1.5046	1.229	1.4926	1.6059	1.0674	1.4347	1.7689	1.1503	1.3094
34.9	1.7389	1.316	1.8494	2.5525	0.9568	1.7333	1.4656	1.2174	1.5313	1.0372	1.706	0.9649	1.6246	1.5599	1.3401	1.9308	1.4907	1.0093	1.366	1.78	1.108	1.442
35	1.7987	1.3507	1.7822	3.0901	1.0515	1.6553	1.4637	1.0844	1.4573	1.2328	1.7668	1.196	1.7394	1.4659	1.4185	1.946	1.5429	1.096	1.3988	1.8188	1.0062	1.5608
35.1	1.7918	1.3021	1.8791	2.9347	1.2094	1.7757	1.4681	1.2256	1.6019	1.2275	1.5892	1.2565	1.6989	1.4361	1.3385	1.922	1.7344	1.2988	1.3234	1.7929	1.0959	1.3226
35.2	1.7496	1.1904	1.6084	2.6873	1.1959	1.7118	1.4301	1.0976	1.3825	1.011	1.7703	0.9521	1.6424	1.4027	1.2002	1.8461	1.6902	1.0877	1.1744	1.8753	1.1657	1.4375
35.3	1.7985	1.3429	1.4249	2.3648	0.9421	1.838	1.4712	1.2386	1.3133	1.2226	1.6361	0.9939	1.6944	1.3706	1.2903	2.114	1.6725	1.0775	1.1973	2.0362	1.1046	1.3777
35.4	1.8767	1.3617	1.2771	2.8606	0.958	1.8068	1.3715	1.3272	1.387	1.3091	1.7391	0.9438	1.8266	1.4599	1.3041	1.9122	1.7728	1.2192	1.2256	2.094	1.1155	1.4011
35.5	1.8774	1.3137	1.3431	2.7908	1.0202	1.9051	1.2649	1.1526	1.6112	1.0741	1.7567	1.0594	1.8041	1.7489	1.3712	1.8208	1.6272	1.0778	1.2215	1.9799	1.0896	1.4432
35.6	1.7718	1.3602	1.4569	2.835	1.2507	1.6548	1.2318	1.0348	1.4027	1.1163	1.7536	0.917	1.6808	1.2701	1.4306	1.7362	1.6817	1.2289	1.2222	1.885	1.1476	1.3198
35.7	1.9067	1.5866	1.2486	2.8864	0.9288	1.7829	1.2792	1.1921	1.4648	1.4543	1.7411	0.8664	1.7986	1.2188	1.1408	1.6415	1.4146	1.3	1.3101	1.8668	1.1992	1.3093
35.8	1.751	1.3123	1.432	2.8697	0.9442	1.6046	1.3042	1.3089	1.4415	1.3068	1.571	1.0414	1.7762	1.3898	1.367	2.1356	1.5996	1.131	1.1605	1.8136	1.294	1.3809
35.9	1.739	1.2969	1.2512	2.9605	0.9446	1.7054	1.3785	1.4946	1.3977	1.0023	1.7234	1.0599	1.6989	1.187	1.259	2.0846	1.4876	1.1133	1.0565	1.9644	1.299	1.3589
36	1.7368	1.4013	1.2245	2.6918	1.3506	1.5979	1.3504	1.4435	1.4624	1.0716	1.7759	1.0804	1.8192	1.644	1.13	2.0672	1.7349	1.0505	1.1681	2.0147	1.3359	1.2897
36.1	1.6386	1.3577	1.4089	2.7584	1.0559	1.6067	1.3636	1.4558	1.5759	1.0438	1.8462	1.2338	1.5991	1.2094	1.3908	1.8373	1.4388	1.1081	1.1006	1.8306	1.2633	1.6134
36.2	1.7994	1.4461	1.3205	2.5776	1.0895	1.825	1.3257	1.8142	1.4883	1.0602	1.8655	1.1923	1.6947	1.3745	1.2737	1.7618	1.6351	1.2045	1.2723	1.9536	1.1298	1.474
36.3	1.8314	1.4197	1.2741	2.5369	1.0856	1.5142	1.3147	1.4116	1.4511	1.1767	1.7624	1.1355	1.4795	1.3541	1.2251	1.988	1.4571	1.1603	1.1509	1.9915	1.2725	1.531
36.4	1.9357	1.4927	1.3843	2.1596	1.1152	1.724	1.2964	1.6964	1.6054	1.3926	1.7208	1.3092	1.6267	1.4455	1.5764	2.0496	1.2995	1.0742	1.1343	1.9726	1.3765	1.4795
36.5	1.7089	1.4382	1.2976	1.9199	1.1409	1.6915	1.2842	1.5304	1.4886	1.0538	2.0026	1.0893	1.7635	1.3902	1.3521	2.1487	1.3632	1.34	1.3353	1.887	1.436	1.5865
36.6	1.8619	1.2943	1.2849	1.7806	0.9008	1.7645	1.3364	1.5539	1.3998	0.8154	1.7616	1.2203	1.7341	1.3693	1.4029	2.12	1.461	1.3205	0.9582	1.8919	1.3083	1.5266
36.7	1.7788	1.2565	1.3468	2.0586	0.9341	1.4994	1.122	1.5785	1.3283	0.885	1.6848	1.2809	1.8722	1.3748	1.4915	1.8758	1.1955	1.0172	1.1824	1.8694	1.3385	1.5181
36.8	1.8214	1.2968	1.5023	2.1112	0.9861	1.7233	1.3168	1.5492	1.4369	1.1644	1.9026	1.31	1.6286	1.2686	1.5354	1.7663	1.2232	0.9967	1.0877	1.9207	1.3321	1.5555
36.9	1.6975	1.4105	1.2946	2.0892	0.9763	1.6513	1.1798	1.4131	1.4241	0.8935	2.0332	1.1696	1.7637	1.2453	1.7092	2.0958	1.3827	1.0242	1.4646	1.9264	1.3622	1.2271
37	1.8288	1.5267	1.3516	1.8816	1.0366	1.5225	1.2889	1.3807	1.4059	1.0105	1.8803	1.1841	1.7348	1.1502	1.6171	1.9269	1.4008	0.9838	1.3091	1.9514	1.2736	1.2801
37.1	1.888	1.4255	1.4267	2.1788	1.0935	1.7963	1.22	1.3679	1.4234	1.0645	1.9098	1.1502	1.6598	1.6511	1.5822	1.9452	1.531	1.2605	1.3619	1.7881	1.2547	1.4988
37.2	1.6216	1.307	1.219	2.0555	1.0245	1.9925	1.2328	1.1134	1.264	1.2124	1.7187	1.2871	1.7056	1.453	1.6905	2.2636	1.3781	1.0686	1.3366	1.8277	1.157	1.5499
37.3	1.9811	1.308	1.3737	1.9189	0.9128	2.0433	1.2615	1.2659	1.6735	0.9794	1.8783	1.1063	1.6318	1.3326	1.5687	1.8566	1.4429	1.1933	1.176	1.7456	1.1614	1.2524
37.4	1.976	1.221	1.5631	2.0432	0.8351	2.0012	1.5103	1.2518	1.6979	1.2457	1.9065	1.3196	1.5804	1.4721	1.7486	1.9564	1.394	1.0538	1.4652	2.0154	1.2967	1.4576
37.5	1.7787	1.3922	1.4652	2.1015	1.1414	1.9645	1.2772	1.4795	1.5288	1.2733	1.8021	1.2887	1.6331	1.3267	1.6347	2.0333	1.4143	1.0007	1.2625	1.8419	1.156	1.1763
37.6	2.1268	1.1779	1.6815	2.1977	1.0131	2.2439	1.2757	1.2369	1.4041	1.1331	1.711	1.3206	1.5572	1.1117	1.5546	1.908	1.4097	0.9672	1.306	2.0234	1.4811	1.588
37.7	1.8449	1.3761	1.3427	2.4528	0.9589	2.1243	1.2028	1.2372	1.2861	0.9015	1.8606	1.1871	1.8083	1.0351	1.5113	1.7891	1.4317	0.9771	1.2132	1.9773	1.3183	1.2934
37.8	2.0247	1.0581	1.5808	2.1964	1.0407	2.1787	1.2035	1.2033	1.4076	0.9264	1.9957	1.4034	1.6231	1.1346	1.6309	1.8022	1.4072	1.2689	1.2487	1.8927	1.2156	1.286
37.9	1.9647	1.1593	1.4754	2.2109	1.0534	2.2803	1.0982	1.1922	1.7117	1.3861	2.1361	1.3637	1.8903	1.2107	1.5316	1.6665	1.4073	1.1475	1.0679	2.0364	1.507	1.4036
38	2.0469	1.188	1.2672	2.1077	0.7567	2.0332	1.1708	1.1378	1.5118	1.4444	1.9255	1.3354	1.7425	1.1721	1.6561	1.6177	1.4414	1.1405	1.1849	1.8055	1.2388	1.5257
38.1	1.8588	1.1375	1.4692	2.137	0.7251	2.0814	1.2129	1.248	1.308	1.2876	1.9341	1.1661	1.6108	1.1228	1.5036	1.7764	1.3966	1.0402	1.2586	1.8862	1.3279	1.4409
38.2	1.8927	1.3904	1.4977	2.0251	1.2117	2.0179	1.2688	1.2939	1.2164	1.3195	1.9126	1.1699	1.754	1.1303	1.707	1.7095	1.436	1.1702	1.0212	1.8597	1.2239	1.4094
38.3	1.8593	1.3988	1.4893	1.95	1	2.1768	1.331	1.1047	1.3141	1.0791	1.7443	1.2666	1.8936	1.0765	1.6576	1.442	1.268	1.0909	1.2213	1.9354	1.3592	1.4014
38.4	1.8187	1.4535	1.3743	1.9973	1.0943	1.7767	1.2735	1.2951	1.423	1.1577	1.9194	1.0727	1.8906	1.3489	1.6505	1.6912	1.3935	1.1141	1.231	1.9605	1.463	1.5474
38.5	1.8135	1.1694	1.7009	2.0427	1.1803	1.9588	1.1824	1.1596	1.4598	1.1511	1.7621	1.061	1.781	1.0395	1.4699	1.2863	1.6381	0.9785	1.3214	1.924	1.2276	1.4641
38.6	2.2045	1.213	1.6999	2.1506	1.0331	1.6923	1.3094	1.1706	1.4702	1.1417	1.7332	1.2715	1.6797	1.1825	1.7506	1.8401	1.5075	1.1298	1.3306	1.7766	1.2719	1.6046
38.7	1.6729	1.3239	1.5899	2.1526	1.0718	1.7401	1.1812	1.183	1.5133	1.3762	1.7242	1.3765	1.6747	1.0905	1.6157	1.641	1.4375	1.1515	1.2253	1.8797	1.3831	1.5646
38.8	2.033	1.1254	1.7049	2.1566	1.018	1.9155	1.4023	1.1553	1.3419	1.2102	1.6768	1.4141	1.6774	1.1598	1.6905	1.4632	1.433	0.9224	1.201	1.9138	1.5402	1.501
38.9	1.6768	1.3115	1.699	2.0968	1.1632	1.975	1.5363	1.0352	1.359	1.0198	1.7544	1.3731	1.578	1.1312	1.8743	1.3826	1.4661	0.9964	1.3625	1.9779	1.5473	1.4623
39	1.5411	1.309	1.8086	2.0051	0.9544	1.8487	1.507	1.0482	1.2402	1.2835	1.6692	1.5192	1.8647	1.0278	1.5908	1.6911	1.476	0.9768	1.0868	1.8129	1.3529	1.1466
39.1	1.6342	1.1246	1.7522	2.2375	0.9072	1.8739	1.2941	1.1759	1.4351	1.2525	1.6884	1.2632	1.8804	1.1321	1.6539	1.4445	1.6237	1.0577	1.1811	1.9377	1.4284	1.1924
39.2	1.717	1.2507	1.7503	2.0963	1.0438	1.7662	1.3259	1.2578	1.4558	1.4029	1.6253	1.3473	1.6617	1.2435	1.99	1.3293	1.3614	0.865	1.2479	1.7876	1.3058	1.4214
39.3	1.8151	1.1202	2.0652	1.9506	1.2077	2.2449	1.2369	1.2389	1.3599	1.3332	1.652	1.3165	1.7242	1.1983	1.7545	1.3113	1.4733	0.9866	1.2104	1.9391	1.2445	1.268
39.4	1.7193	1.1939	2.2055	1.8219	1.1592	2.0603	1.3705	1.4981	1.3279	1.4182	1.5678	1.2165	1.5866	1.2185	1.6728	1.2486	1.4719	0.9807	1.1187	1.9637	1.3338	1.3338
39.5	1.6843	1.2543	2.4381	2.0299	1.1376	2.0817	1.3611	1.168	1.4959	1.4681	1.7594	1.3706	1.5157	1.2562	1.6897	1.3223	1.4063	1.2584	1.366	1.8786	1.317	1.4163
39.6	1.6092	1.2527	2.3144	2.077	0.94	2.0686	1.2855	1.3731	1.4628	0.9958	1.6509	1.244	1.5718	1.2659	1.8526	1.2787	1.6184	1.0244	1.1619	2.2042	1.3716	1.4142
39.7	1.4358	1.355	1.9721	1.9463	0.9561	1.8423	1.4162	1.1522	1.5419	1.242	1.6308	1.3327	1.6708	1.3287	1.6517	1.3339	1.4992	1.2113	1.2526	1.9131	1.291	1.2278
39.8	1.3997	1.3474	2.135	2.0087	0.88	1.8684	1.3149	1.091	1.5504	1.5832	1.6179	1.2651	1.8398	1.7684	1.7186	1.5588	1.5099	1.116	1.2002	1.8488	1.307	1.5566
39.9	1.3071	1.4748	2.0383	2.0137	0.9522	1.8931	1.3866	1.1908	1.4332	1.1138	1.6063	1.2948	1.6982	1.296	1.6192	1.4227	1.668	1.1097	1.1643	1.7571	1.2515	1.4078
40	1.4961	1.4121	2.2505	2.0276	0.9101	1.6505	1.2436	1.2607	1.4387	1.0741	1.6057	1.2464	1.8645	1.2306	1.5335	1.4339	1.5681	1.2194	1.2343	1.7448	1.3221	1.6206
40.1	1.6706	1.2756	2.6498	2.0687	1.1339	1.7863	1.3053	1.1161	1.5149	0.8913	1.8249	1.2799	1.6711	1.372	1.5851	1.3061	1.6184	1.0504	1.0892	1.6232	1.3136	1.2675
40.2	1.6503	1.3028	2.5839	2.0503	1.2183	1.771	1.63	1.3119	1.3891	1.7516	1.8152	1.4623	1.6407	1.2692	1.5784	1.31	1.51	1.1406	1.2896	1.7823	1.253	1.2406
40.3	1.5817	1.3369	2.7494	1.8888	1.0671	1.8832	1.4383	1.1223	1.5096	1.3357	1.737	1.4533	1.5617	1.3217	1.4857	1.1818	1.3898	1.1812	1.2081	1.7376	1.2557	1.3272
40.4	1.5315	1.273	2.8806	1.9285	1.0028	1.7055	1.3956	1.1454	1.5963	1.1499	1.9114	1.3503	1.5713	1.483	1.5933	1.3915	1.3904	1.2472	1.2192	1.6775	1.2794	1.5969
40.5	1.3815	1.3323	2.5847	1.957	0.9258	1.8061	1.509	1.2431	1.4562	0.9254	1.7993	1.2688	1.6988	1.4302	1.4927	1.1963	1.521	1.1737	1.2695	1.6246	1.2086	1.4614
40.6	1.4158	1.232	2.5548	2.2632	1.0438	1.8192	1.3806	1.2838	1.6303	0.8718	1.748	1.3608	1.9187	1.5936	1.6194	1.2979	1.3159	1.1949	1.2711	1.7258	1.1801	1.4465
40.7	1.6829	1.5023	2.4013	1.9481	1.2578	1.8307	1.2563	1.3128	1.4263	1.1008	1.8635	1.2437	1.8745	1.4736	1.6648	1.2094	1.35	1.1737	1.3219	1.6653	1.4608	1.5798
40.8	1.4361	1.1534	2.8272	1.851	1.2878	1.8289	1.1636	1.1469	1.4801	1.1597	1.9509	1.3797	2.0652	1.6551	1.6531	1.1544	1.6341	1.0545	1.3635	1.686	1.3006	1.3342
40.9	1.7603	1.3057	2.6864	1.6993	0.9649	1.6432	1.4444	1.2395	1.5208	1.0618	1.8408	1.1731	1.7166	1.6432	1.5944	1.182	1.8001	1.0033	1.2176	1.6622	1.3423	1.5057
41	1.6915	1.2333	2.702	1.6833	0.8445	1.9838	1.3324	1.2079	1.4662	0.9879	1.6634	1.2791	1.6577	1.2925	1.6845	1.05	1.6108	1.1779	1.0894	1.8102	1.2377	1.4911
41.1	1.5017	1.1715	2.8145	1.8574	0.7625	1.9849	1.4225	1.2391	1.5432	1.0161	1.8866	1.2366	1.7439	1.4647	1.646	1.1848	1.744	1.11	1.2905	1.7418	1.2988	1.4684
41.2	1.48	1.0804	2.4519	2.0014	0.905	1.8255	1.2599	1.2895	1.5642	1.4408	1.8657	1.2321	1.8111	1.6988	1.5732	1.0955	1.6344	1.3188	1.1372	1.5424	1.2586	1.4778
41.3	1.5609	1.0949	2.7331	1.8917	0.8487	1.9305	1.2222	0.9775	1.4909	1.2936	1.8402	1.3083	1.8059	1.8338	1.541	1.1658	1.603	1.3696	1.2702	1.7686	1.2692	1.3231
41.4	1.5443	1.1411	2.5778	1.6292	0.9896	1.8992	1.178	1.1439	1.5981	1.1556	1.9263	1.2854	1.8106	1.6926	1.6264	1.3629	1.5883	1.22	1.4643	1.7187	1.4641	1.6176
41.5	1.753	1.0586	2.223	1.6018	1.1193	1.8656	1.4635	1.0751	1.6743	1.3622	1.7563	1.2851	2.0076	1.4723	1.6464	1.0857	1.6204	1.0238	1.5644	1.7773	1.3684	1.4758
41.6	1.5307	1.0021	2.2553	1.6783	0.8907	1.7975	1.5023	1.1158	1.507	1.2755	2.0492	1.4038	1.8513	1.3423	1.6734	0.9285	1.5014	1.2953	1.8088	1.7579	1.5047	1.5568
41.7	1.6444	1.3257	2.2666	1.5698	0.9952	1.7181	1.2551	1.1469	1.5935	1.2067	1.9962	1.4195	1.7347	1.4257	1.8206	1.0547	1.4727	1.209	1.3306	1.7286	1.2461	1.392
41.8	1.5459	1.1037	2.3986	1.7996	0.8933	2.1188	1.2789	1.084	1.5028	1.4134	1.9441	1.3529	1.7228	1.3228	1.644	0.9806	1.6269	1.3846	1.427	1.8803	1.4074	1.3855
41.9	1.5094	1.1177	2.0903	1.4848	1.0328	1.7065	1.1982	1.0562	1.5393	1.3405	2.0204	1.4272	1.6809	1.5895	1.5712	0.976	1.4202	1.1027	1.3624	1.8467	1.4892	1.3802
42	1.4426	0.9291	1.9884	1.6495	0.8464	1.9001	1.1822	1.0798	1.524	1.1244	1.8924	1.2364	1.6916	1.3316	1.7061	0.9802	1.4311	1.2242	1.2555	1.7705	1.3813	1.4108
42.1	1.5397	1.0674	1.9901	1.7043	0.939	2.0926	1.2621	0.9721	1.4419	1.2931	1.9273	1.3676	1.8294	1.573	1.6911	1.0603	1.6288	1.1824	1.2426	1.7891	1.2867	1.5084
42.2	1.3793	1.3982	2.2969	1.4127	0.7868	2.0058	1.2468	1.274	1.4932	1.1643	1.8432	1.2613	1.4849	1.2221	1.7489	1.0499	1.7285	1.1268	1.1768	1.7499	1.3456	1.5879
42.3	1.5008	1.1406	2.4658	1.4938	0.9991	2.0957	1.3238	1.1388	1.5447	1.2269	1.8325	1.2136	1.7665	1.307	1.7044	1.0935	1.7117	1.0733	1.2014	1.7112	1.3298	1.2785
42.4	1.6656	1.1234	2.4574	1.6632	0.9531	1.8447	1.2908	1.075	1.4911	1.4921	1.7715	1.189	1.6565	1.5514	1.8024	0.9968	1.7574	1.1101	1.3237	1.5558	1.5781	1.789
42.5	1.4871	1.0003	2.6202	1.6586	0.918	2.141	1.2428	1.2083	1.6076	1.3494	1.8477	1.1377	1.5561	1.6243	1.847	0.9805	1.6368	1.0785	1.1129	1.7191	1.3567	1.7161
42.6	1.8913	1.2728	2.3143	1.5562	0.8546	1.6803	1.2712	1.0929	1.5564	1.3435	1.7651	1.3325	1.7609	1.7992	1.7498	0.9355	1.4671	1.1301	1.0223	1.6034	1.2741	1.7121
42.7	1.5942	1.2065	2.2789	1.5608	0.9952	1.79	1.3413	1.0053	1.7169	0.86	1.8533	1.1939	1.7361	1.6741	1.7656	1.0607	1.6106	1.1798	1.1241	1.6383	1.4037	1.6438
42.8	1.529	1.2585	2.4233	1.4533	0.9827	1.6228	1.3107	1.1742	1.5163	1.1579	1.8302	1.2873	1.6456	1.5238	1.7849	1.2589	1.4967	1.0092	1.3448	1.6338	1.3181	1.5974
42.9	1.6907	1.2107	2.3359	1.6129	1.0027	2.0867	1.2771	1.0091	1.5126	1.0167	1.9849	1.4121	1.6932	1.531	1.8405	1.1758	1.4814	1.0228	1.3067	1.6635	1.3083	1.5834
43	1.5846	1.039	2.8471	1.6575	1.205	1.9421	1.2589	1.2383	1.537	1.1957	1.9116	1.371	1.7081	1.3833	1.7572	1.2378	1.5186	1.1279	1.3792	1.7339	1.3431	1.467
43.1	1.5702	1.3235	2.8875	1.7736	0.9666	1.9651	1.3821	1.2099	1.5319	1.6034	1.6702	1.3082	1.8323	1.524	1.8167	1.1883	1.6262	1.1743	1.4441	1.62	1.1708	1.4536
43.2	1.4553	1.12	2.6539	1.7373	0.9556	2.1069	1.2518	1.0896	1.7837	1.7742	2.0218	1.428	1.9581	1.648	1.6691	1.1004	1.5053	1.0511	1.344	1.6631	1.1213	1.4819
43.3	1.6586	1.0327	2.695	1.8198	0.9899	1.8205	1.1996	1.3472	1.5531	1.7447	1.6063	1.3428	2.0693	1.487	1.4452	1.0659	1.4959	1.2842	1.1341	1.7472	1.1101	1.3341
43.4	1.749	1.0123	3.0522	1.7697	0.8961	1.8327	1.121	1.1889	1.5229	1.4088	1.6748	1.3484	1.9302	1.2935	1.9792	1.2708	1.3615	1.2729	1.4533	1.6728	1.1453	1.503
43.5	1.544	1.1232	2.5685	1.5727	0.993	1.8879	1.1387	1.2816	1.4605	1.1164	1.8756	1.3304	1.8518	1.3146	1.788	1.1048	1.4127	1.2144	1.2541	1.6759	1.1901	1.2941
43.6	1.3167	1.0169	2.7076	1.5719	1.1728	1.4259	1.1335	1.2978	1.5079	1.2091	1.838	1.3503	1.7985	1.3466	1.7598	1.0815	1.6591	1.0274	1.4224	1.6472	1.3103	1.3585
43.7	1.5518	1.1853	2.5358	1.7232	0.9851	1.4703	1.1727	1.4854	1.4852	1.1493	1.6753	1.2636	1.8457	1.4622	1.51	1.1236	1.6744	1.4147	1.3672	1.6689	1.1238	1.4802
43.8	1.6225	1.3252	2.414	1.6076	1.0469	1.8094	1.3812	1.0996	1.6667	1.1062	1.7637	1.355	1.6748	1.4016	1.5336	1.4356	1.4237	1.0969	1.2486	1.7442	1.3914	1.496
43.9	1.6829	1.1253	2.6169	1.5505	0.9159	1.8077	1.1978	1.0446	1.5107	1.3499	1.9075	1.2795	1.7098	1.5331	1.6939	1.4643	1.4654	1.1209	1.6451	1.6836	1.3945	1.3639
44	1.6647	1.0307	2.5696	1.8717	1.2175	1.8697	1.22	1.0929	1.7033	1.1216	1.7035	1.2984	1.6618	1.342	1.6951	1.4029	1.5432	1.1314	1.3951	1.8227	1.2156	1.6251
44.1	1.7231	1.1973	2.541	2.0054	0.8083	1.9371	1.3596	1.2194	1.5066	1.2323	1.7572	1.4053	1.7597	1.367	1.7487	1.2355	1.5344	1.1363	1.479	1.6133	1.1772	1.6304
44.2	1.6643	1.1698	2.4795	2.2827	1.0672	1.7419	1.3486	1.097	1.6725	1.1755	1.6915	1.2864	1.9683	1.2871	1.8005	1.3649	1.4629	1.2794	1.2325	1.6613	1.3295	1.5004
44.3	1.5306	1.2771	2.8366	2.2889	1.0796	2.0168	1.3889	1.142	1.5706	1.0942	1.7238	1.4539	2.1852	1.4319	1.5079	1.0563	1.58	1.2099	1.1868	1.7095	1.2353	1.557
44.4	1.3545	1.112	2.7489	2.1751	1.3415	1.7521	1.2604	1.1625	1.7702	1.0145	1.6953	1.464	1.8295	1.341	1.5742	1.3409	1.393	1.1278	1.2631	1.7827	1.314	1.5571
44.5	1.436	1.0985	2.8185	2.1915	0.9822	2.0171	1.3342	1.2068	1.583	1.038	1.7933	1.4049	1.7723	1.5705	1.705	1.3263	1.6359	1.06	1.2046	1.8277	1.3758	1.5375
44.6	1.5192	1.0446	2.5185	2.3748	1.0653	1.8152	1.4428	1.3343	1.4673	0.823	1.7746	1.6681	2.0805	1.27	1.756	1.0408	1.5769	1.3997	1.0413	1.6704	1.2887	1.6134
44.7	1.5441	0.928	2.5248	1.9008	1.0016	1.725	1.4799	1.4158	1.6676	0.8711	1.8593	1.3191	2.1167	1.3566	1.941	1.1541	1.6375	1.2397	1.2896	1.5633	1.3659	1.5225
44.8	1.5389	0.8964	2.607	2.1491	0.9528	1.7545	1.2135	1.49	1.5715	0.9519	1.7737	1.4517	2.0712	1.19	1.875	1.1616	1.498	1.2971	1.2942	1.5496	1.5219	1.644
44.9	1.674	1.1011	2.3724	2.2327	1.0015	1.6814	1.394	1.4651	1.426	0.8314	1.7116	1.4079	2.0763	1.4317	1.6691	1.2241	1.5655	1.2549	1.1796	1.7258	1.1877	1.3851
45	1.6086	1.3159	2.7685	2.3086	0.9175	1.8203	1.3458	1.3604	1.5523	1.1118	1.7805	1.4655	1.7634	1.3379	1.6359	1.4048	1.7893	1.2739	1.2851	1.7712	1.2885	1.3317
45.1	1.6164	1.0705	2.791	2.3036	0.9571	1.6513	1.3243	1.3304	1.6532	0.9213	1.6899	1.4356	1.8273	1.2341	1.6513	1.3753	1.5308	1.2935	1.3491	1.5697	1.241	1.5508
45.2	1.6814	1.1454	2.6818	2.1668	0.9634	1.7057	1.5503	1.4031	1.5602	0.835	1.7372	1.3518	1.9375	1.3892	1.7018	1.5465	1.5942	1.5488	1.2521	1.5843	1.3531	1.3357
45.3	1.5134	1.3309	2.5913	1.8847	0.9673	1.5132	1.3395	1.288	1.4889	1.0273	1.7057	1.3831	2.0735	1.3034	1.8543	1.6778	1.4564	1.4348	1.2267	1.5255	1.1833	1.535
45.4	1.4802	1.1991	2.7718	2.0098	0.9415	1.4836	1.4077	1.2319	1.574	0.921	1.7693	1.5378	1.7037	1.3564	1.8459	1.5716	1.3683	1.349	1.2175	1.6457	1.3374	1.5286
45.5	1.7479	1.5209	2.6631	2.1927	1.1727	1.7034	1.2562	1.2615	1.6168	1.0735	1.6633	1.3594	1.7912	1.3852	1.623	1.918	1.4088	1.5625	1.3692	1.6327	1.2653	1.6095
45.6	1.6076	1.3677	2.506	2.0844	1.1505	1.4494	1.2399	1.3985	1.5822	1.0867	1.7475	1.5212	2.1167	1.4495	1.6201	1.9379	1.3512	1.4434	1.2485	1.6741	1.3619	1.5765
45.7	1.4853	1.2739	2.1974	2.1956	1.2584	1.3723	1.1085	1.2786	1.7359	0.8328	2.016	1.5015	1.9641	1.1861	1.6732	1.4957	1.4024	1.6206	1.2155	1.6101	1.1894	1.5011
45.8	1.5709	1.1945	2.1463	2.5489	1.1461	1.423	1.2502	1.385	1.5692	1.0047	1.8047	1.4133	1.7822	1.2787	1.8446	1.2785	1.3556	1.5557	1.7377	1.6239	1.4118	1.365
45.9	1.4604	1.4201	2.2491	1.9232	1.3271	1.5205	1.0668	1.2856	1.6771	1.2093	1.6867	1.2958	2.2519	1.3607	1.8357	1.2707	1.4676	1.6074	1.152	1.7641	1.3461	1.4731
46	1.4626	1.2453	2.54	2.2256	1.1439	1.5613	1.187	1.1942	1.5963	1.0647	1.7115	1.5353	1.9283	1.355	1.8777	1.2817	1.4261	1.4467	1.3158	1.6931	1.4419	1.3153
46.1	1.5135	1.2814	2.5016	2.4113	1.1526	1.4459	1.1168	1.2693	1.5272	0.8201	1.7955	1.4995	1.9973	1.3764	2.0015	1.1353	1.3503	1.4623	1.3187	1.3554	1.2602	1.5582
46.2	1.5979	1.2061	2.5662	2.5255	1.0666	1.4927	1.3258	1.1664	1.4698	0.8796	1.7065	1.5964	1.9569	1.416	1.9258	1.1444	1.4409	1.6444	1.3759	1.5319	1.165	1.4913
46.3	1.376	1.19	2.3929	2.3313	1.0936	1.7225	1.2881	1.4056	1.5002	1.0316	1.6393	1.8004	1.8284	1.3289	1.7732	1.0577	1.4167	1.4572	1.2715	1.4994	1.2117	1.5958
46.4	1.5647	1.1346	2.3145	2.3548	1.0862	1.5238	1.2728	1.3843	1.5881	0.9891	2.0113	1.4532	1.9037	1.3669	1.8764	1.2029	1.4111	1.549	1.3857	1.5835	1.1551	1.374
46.5	1.518	1.1778	2.1977	2.5894	1.3829	1.8077	1.1526	1.4589	1.4862	0.8131	1.8319	1.5351	1.8255	1.3026	1.8712	1.2322	1.6179	1.3943	1.2613	1.4948	1.2543	1.2765
46.6	1.6126	1.1891	2.4112	2.0722	1.2642	2.1896	1.1744	1.413	1.4632	0.8758	1.7385	1.3632	1.8018	1.382	1.8581	1.2786	1.5061	1.3929	1.3868	1.4757	1.2722	1.3964
46.7	1.3926	1.2157	2.1729	2.4349	1.0547	1.6962	1.272	1.3313	1.6799	0.825	1.6215	1.4941	1.873	1.3235	2.0154	1.0427	1.5651	1.4025	1.3042	1.5911	1.3182	1.3643
46.8	1.5744	1.1523	1.8519	2.2817	1.4056	1.6971	1.2523	1.3348	1.3851	0.9895	1.606	1.421	1.7639	1.322	2.0748	0.9615	1.5025	1.4243	1.2308	1.5368	1.1845	1.5109
46.9	1.6222	1.1215	2.4607	2.3748	1.3519	1.7475	1.0826	1.4583	1.4562	0.964	1.8863	1.4009	1.7995	1.3105	2.1343	1.0314	1.4584	1.493	1.1133	1.5894	1.3942	1.7201
47	1.5507	1.1477	2.3765	2.3551	1.3291	1.8666	1.2228	1.3137	1.503	1.114	1.8668	1.455	1.7468	1.3641	2.0808	0.9563	1.3999	1.4167	1.0526	1.5546	1.313	1.7146
47.1	1.4437	1.3554	2.4466	2.4215	1.3192	1.6861	1.2111	1.2882	1.5133	1.0183	1.9124	1.3801	1.7312	1.5357	1.8308	1.0279	1.4566	1.4946	1.0362	1.6625	1.158	1.6016
47.2	1.5212	1.2452	2.4856	2.2335	1.4182	1.7089	1.3028	1.4562	1.4673	0.9196	1.9382	1.4566	1.8435	1.6734	2.0155	1.1643	1.496	1.6431	1.0574	1.5498	1.1923	1.4458
47.3	1.6827	1.1802	2.5165	2.3453	1.2203	1.7272	1.2623	1.1887	1.4162	1.1268	1.7639	1.5217	1.8404	1.4222	1.9331	1.017	1.5594	1.4143	1.2877	1.5954	1.4113	1.4653
47.4	1.4538	1.1635	2.504	2.2239	1.1196	1.5834	1.0928	1.3719	1.4551	0.898	1.7429	1.451	1.721	1.3742	1.969	0.9607	1.5893	1.4184	1.253	1.5951	1.2446	1.3096
47.5	1.6195	1.1067	2.3805	2.0363	0.9386	1.5899	1.145	1.5025	1.3069	0.9428	1.7177	1.5949	1.9964	1.374	1.8953	0.9629	1.5107	1.7478	1.5229	1.5103	1.1093	1.4198
47.6	1.5583	1.067	2.1876	2.1818	0.9962	1.86	0.9392	1.4143	1.3902	0.9867	1.6896	1.514	1.7124	1.2695	1.8916	0.8677	1.4396	1.6382	1.6087	1.4932	1.2185	1.4324
47.7	1.4897	1.1681	2.239	2.1365	1.0044	1.7855	0.9771	1.461	1.3633	0.9966	1.8988	1.5154	1.745	1.3734	1.9346	1.1015	1.6251	1.7032	1.5454	1.69	1.3874	1.4418
47.8	1.6168	1.2459	2.2223	2.3996	0.8357	1.7026	1.0635	1.5544	1.333	0.8955	1.9757	1.4554	1.8641	1.3921	1.8593	1.2205	1.4691	1.5234	1.5849	1.8129	1.2728	1.5364
47.9	1.5671	1.3589	2.3691	2.3851	0.876	1.5989	0.9482	1.5104	1.4977	0.8149	1.8394	1.5514	1.7982	1.3171	2.025	1.1467	1.4623	1.4886	1.4695	1.6203	1.0859	1.606
48	1.4574	1.3391	2.5907	2.1228	0.9326	1.5505	1.0586	1.2934	1.5845	0.9175	1.8389	1.3611	1.8477	1.5122	2.0625	0.8931	1.3668	1.3539	1.1198	1.711	1.2236	1.4944
48.1	1.5166	1.1194	2.5473	2.1754	0.8445	1.6207	0.8686	1.3614	1.6153	0.9141	1.823	1.5114	1.7012	1.5308	1.9255	0.9887	1.4647	1.2716	1.1509	1.7723	1.3875	1.4071
48.2	1.6218	0.9935	2.3295	2.4616	1.0426	1.7131	1.088	1.2434	1.3666	0.9434	1.8389	1.488	1.7872	1.5308	2.0178	0.9933	1.4331	1.1637	1.1327	1.661	1.2765	1.3781
48.3	1.5666	1.2952	2.2039	2.2158	0.9269	1.7368	1.0183	1.2627	1.4604	0.9927	1.8335	1.5279	1.7688	1.5934	2.0457	1.0046	1.6011	1.3804	1.3334	2.0042	1.4215	1.583
48.4	1.7452	1.1718	2.219	2.1193	0.889	1.8401	1.0706	1.3407	1.7648	0.9989	1.8307	1.5436	1.931	1.4442	1.9794	0.8118	1.4084	1.3465	1.223	1.6683	1.2411	1.4952
48.5	1.6632	1.2874	2.1024	2.2207	0.9894	1.7533	1.0805	1.3349	1.746	1.1966	1.8963	1.3369	1.9276	1.4035	2.0136	0.879	1.4285	1.2421	1.2177	1.9409	1.272	1.4858
48.6	1.7222	1.21	2.24	2.0779	0.9251	1.5423	1.1226	1.2816	1.4714	0.9509	1.9465	1.3234	1.6839	1.4618	1.8621	0.9636	1.636	1.301	1.2902	1.8969	1.2121	1.3971
48.7	1.5772	1.1828	1.7203	2.1133	1.0101	2.0211	1.1326	1.3303	1.5287	0.9056	2.1728	1.3737	1.6502	1.3182	1.853	1.0704	1.4029	1.3137	1.0671	1.8472	1.3994	1.5418
48.8	1.6902	1.3554	2.2804	1.9175	1.0018	1.7678	1.041	1.2802	1.7276	0.9145	1.8749	1.2874	1.7338	1.2803	1.9989	0.9721	1.4327	1.352	1.4277	1.8277	1.1791	1.478
48.9	1.7207	1.2412	2.3587	2.0724	0.9387	1.9144	1.0975	1.22	1.8596	0.891	1.9454	1.4416	1.7828	1.1932	1.966	0.9284	1.4759	1.1998	1.2197	2.0097	1.4093	1.3753
49	1.6164	1.064	2.4033	2.2513	0.8906	1.8968	1.1283	1.2734	1.695	0.8073	1.9144	1.5369	1.9235	1.3405	1.825	0.9384	1.4763	1.2555	1.0305	2.2495	1.4408	1.5487
49.1	1.6168	1.2909	2.4421	2.1163	0.9069	1.8622	0.8231	1.2318	1.7636	0.8327	1.7167	1.4259	1.9315	1.3503	2.0304	1.1081	1.4033	1.2671	1.0763	2.0701	1.1965	1.599
49.2	1.6608	1.1724	2.3678	2.2353	0.8098	1.7204	1.1076	1.3743	1.4917	0.9292	1.8679	1.3613	1.5096	1.3878	1.6914	1.1055	1.4112	1.6232	1.3272	2.1639	1.2474	1.6733
49.3	1.7327	1.2323	2.6472	2.1034	0.9675	1.8106	1.1849	1.3857	1.7533	0.9405	1.8777	1.3528	1.7933	1.2447	1.7727	1.0709	1.4603	1.4227	1.2797	1.9289	1.2906	1.6796
49.4	1.6728	1.2095	2.5911	2.18	0.946	1.8541	1.1619	1.3032	1.4146	0.8819	1.935	1.4258	1.7445	1.395	1.8975	1.0548	1.4734	1.3024	1.1398	1.9032	1.3532	1.5747
49.5	1.6921	1.2724	2.325	1.8703	1.125	2.1211	0.9865	1.3147	1.5218	1.1795	1.7563	1.3788	1.7169	1.2903	1.9929	1.1705	1.5828	1.4813	1.3419	2.002	1.5206	1.4371
49.6	1.656	1.2727	2.3311	1.7935	1.1119	1.8143	1.1244	1.4343	1.439	1.1192	1.8516	1.3163	1.711	1.3395	1.9485	1.0792	1.4273	1.3045	1.1398	2.1672	1.5475	1.3831
49.7	1.647	1.1857	1.7915	2.1936	1.0512	1.7069	1.1122	1.3097	1.6437	0.9879	1.6308	1.448	1.7994	1.284	2.1271	1.1928	1.5098	1.2796	1.2584	2.139	1.304	1.4094
49.8	1.6735	1.3464	1.806	2.0602	1.1137	1.755	1.1659	1.2553	1.6892	1.0118	1.8066	1.5554	1.8956	1.2409	1.9744	1.1027	1.4574	1.4778	1.2431	2.1433	1.3318	1.3518
49.9	1.6555	1.0751	1.5607	2.0334	0.9267	2.3295	1.0696	1.3099	1.5194	0.953	1.8648	1.6053	1.8298	1.3129	2.0169	1.3301	1.6088	1.617	1.1466	2.2273	1.3679	1.432
50	1.657	1.306	1.919	2.2333	0.8936	1.8007	1.1116	1.4183	1.4581	0.9386	1.7325	1.3958	1.8409	1.4611	1.8865	0.9953	1.5125	1.7666	1.2128	2.1158	1.2189	1.4871
50.1	1.6164	1.1714	2.1217	1.8855	0.9607	1.8919	1.138	1.2489	1.5211	0.9492	1.5875	1.4417	1.805	1.322	2.0787	1.1065	1.3802	1.8378	1.5233	2.0876	1.2733	1.5374
50.2	1.616	1.4055	1.8247	1.9278	1.1272	1.6285	1.0852	1.2026	1.535	0.9218	1.7565	1.3562	1.7559	1.3401	2.0583	1.067	1.5627	1.6307	1.6771	2.253	1.3747	1.4554
50.3	1.7442	1.0892	1.9817	2.2586	1.0421	2.0591	1.2654	1.1925	1.3088	1.1433	1.6915	1.518	1.6969	1.2728	1.9291	1.2444	1.4005	1.4515	1.5569	2.1214	1.3465	1.5282
50.4	1.8256	1.3312	1.9558	2.101	1.052	1.828	1.2775	1.3026	1.4517	0.9672	1.5851	1.4361	1.6847	1.2663	1.9862	1.344	1.4047	1.244	1.4881	1.9965	1.3615	1.3822
50.5	1.8955	1.1542	2.3166	2.1648	1.0007	1.8046	1.1711	1.2335	1.3345	0.7468	1.8038	1.3497	1.884	1.3078	2.0438	1.2364	1.4983	1.5063	1.3902	2.0176	1.6529	1.4589
50.6	1.569	1.3058	2.447	2.1567	1.0701	2.2424	1.1673	1.3218	1.4084	0.8876	1.8311	1.452	1.7638	1.2478	1.9678	1.3841	1.3262	1.3759	1.4449	1.9849	1.5923	1.5855
50.7	1.6843	1.2465	2.2581	2.0921	1.0461	1.8155	1.0644	1.3732	1.3738	0.9045	1.6092	1.3822	1.6198	1.4908	1.9419	1.1487	1.2141	1.4451	1.3202	2.0134	1.318	1.3407
50.8	1.5284	1.3352	2.1988	1.8784	1.0978	2.4392	1.1404	1.324	1.4509	0.8677	1.7548	1.4305	1.7055	1.2222	1.8983	0.9649	1.4825	1.3969	1.3794	2.0161	1.3528	1.3204
50.9	1.3997	1.5219	2.2753	1.7762	1.3138	1.9754	1.1983	1.4174	1.6199	0.842	1.8301	1.5104	1.8715	1.3936	1.9334	1.0551	1.5378	1.4797	1.4042	1.9987	1.7206	1.6636
51	1.5753	1.2034	2.4726	1.914	0.9192	2.4929	1.1586	1.1032	1.4414	1.0736	1.9992	1.4564	1.6119	1.3379	1.8717	1.038	1.4063	1.5984	1.2495	2.2224	1.214	1.7781
51.1	1.739	1.2384	2.5563	1.8021	1.0891	2.2387	1.2444	1.348	1.3096	0.9201	1.6782	1.3411	1.8582	1.2828	1.7278	0.9757	1.5048	1.569	1.2574	2.1214	1.3609	1.71
51.2	1.6419	1.2446	2.5578	2.1844	0.8963	2.165	1.0929	1.4031	1.6153	0.8896	1.8817	1.4594	1.7916	1.3359	1.8883	1.1098	1.3003	1.5804	1.2207	1.9653	1.3312	1.9873
51.3	1.5788	1.2985	2.3715	1.9823	0.9477	1.9456	1.1995	1.5223	1.7122	1.021	1.9988	1.3806	1.7514	1.3676	1.8434	0.9663	1.5355	1.5087	1.3354	2.0903	1.3094	1.6194
51.4	1.6651	1.2142	2.6138	2.2271	0.9856	1.6644	1.1569	1.347	1.8724	0.9794	1.7917	1.4966	1.7112	1.2895	1.8057	0.852	1.4801	1.5828	1.514	1.9733	1.3341	1.8003
51.5	1.6981	1.4642	2.3099	2.3493	1.0972	1.8436	1.2611	1.3904	1.7088	0.9354	1.7503	1.4444	1.7519	1.3849	1.8998	1.098	1.4561	1.4605	1.4348	2.0749	1.3994	1.5091
51.6	1.7915	1.1474	2.3564	2.2707	1.3085	1.8184	1.3948	1.3616	1.4421	1.022	1.6148	1.4024	1.8593	1.3264	1.958	1.1312	1.3911	1.5878	1.4303	2.1508	1.1829	1.5722
51.7	1.845	1.2155	2.0468	2.2341	0.898	1.7085	1.3765	1.4834	1.5548	0.953	1.5887	1.4728	1.8874	1.38	1.8869	0.8807	1.3487	1.5541	1.2978	2.1027	1.3643	1.5718
51.8	1.7865	1.2787	2.0168	2.4176	1.2837	2.0509	1.3095	1.4757	1.5465	0.9937	1.6637	1.3912	1.8496	1.3854	1.7063	1.367	1.3929	1.4712	1.2733	2.1082	1.3909	1.5282
51.9	1.7139	1.2083	2.0597	2.327	1.2705	1.9372	1.3221	1.4304	1.4464	1.393	1.6275	1.6872	1.7849	1.3469	1.7134	1.4969	1.2652	1.4446	1.1993	2.0792	1.2082	1.3477
52	1.555	1.2372	2.0471	2.4344	1.0454	2.1399	1.1509	1.3507	1.3904	1.2973	1.6883	1.6768	1.6707	1.4217	1.7157	1.1971	1.4359	1.7467	1.2831	1.9869	1.2324	1.5008
52.1	1.7804	0.9981	2.059	2.5479	0.9175	1.8768	1.3473	1.6445	1.3231	1.0214	1.5426	1.5548	2.028	1.3622	2.0045	1.4934	1.5615	1.7667	1.3257	2.0796	1.3608	1.3733
52.2	1.876	1.3491	1.9743	2.2724	1.0852	2.0392	1.3419	1.6252	1.6048	1.0543	1.5973	1.5283	1.8611	1.2805	1.9702	1.5384	1.3036	1.9876	1.486	2.0972	1.121	1.5651
52.3	1.8306	1.3801	2.1685	2.0223	1.094	2.3581	1.2188	1.3545	1.849	1.1541	1.6665	1.5272	1.8913	1.2719	2.1059	1.3439	1.3644	1.762	1.2749	2.125	1.2089	1.3871
52.4	1.8236	1.2828	1.8652	2.016	1.0354	2.3611	1.1236	1.5194	1.5103	1.1074	1.8321	1.4176	1.5754	1.3233	2.0115	1.4733	1.3375	1.5483	1.2786	2.0056	1.3377	1.5471
52.5	1.7418	1.2957	1.7453	2.1942	0.9871	2.1573	1.4123	1.4264	1.4801	0.9894	1.616	1.299	1.7979	1.4364	2.0783	1.5469	1.3467	1.5443	1.3085	1.983	1.3431	1.3992
52.6	1.7293	1.3686	1.8462	2.1358	0.8841	2.1614	1.3257	1.4633	1.6713	0.94	1.7216	1.2184	1.9187	1.5251	1.8471	1.4058	1.5094	1.6981	1.2407	2.0243	1.1952	1.3819
52.7	1.7525	1.5869	1.9501	2.2285	1.0597	1.9543	1.0515	1.4596	1.8071	1.0114	1.5328	1.2529	1.7594	1.3281	2.0572	1.2842	1.5698	1.391	1.2899	1.7956	1.037	1.3527
52.8	1.6017	1.3828	2.0482	2.2653	1.2955	1.8357	1.2488	1.3745	1.5082	1.0189	1.6087	1.3036	1.7956	1.2418	1.9101	1.1822	1.4849	1.6384	1.4023	1.8509	1.1298	1.498
52.9	1.6529	1.6012	1.8674	2.5532	1.1881	1.7405	1.141	1.5626	1.4206	0.9299	1.8111	1.3334	1.9928	1.1919	1.9893	1.1811	1.5441	1.434	1.3723	1.9542	1.3966	1.4644
53	1.6395	1.4086	2.1534	2.5388	1.3423	1.8527	1.2045	1.5958	1.5499	0.9664	2.3763	1.1835	1.8647	1.2142	1.8914	1.1599	1.7939	1.4685	1.2522	1.9635	1.2647	1.422
53.1	1.7661	1.4218	2.3714	2.2387	1.1094	1.8169	1.3023	1.4598	1.6244	1.0217	2.0596	1.3262	1.8361	1.2766	1.7239	1.1371	1.53	1.4119	1.2743	1.8974	1.3425	1.5903
53.2	1.5935	1.5667	2.3426	2.2393	0.9173	1.6485	1.3257	1.3191	1.656	0.8902	2.1707	1.1748	1.7481	1.3098	1.8844	1.2453	1.5396	1.3817	1.3539	1.8468	1.3351	1.2995
53.3	1.7703	1.653	2.5958	2.3923	1.0182	2.3271	1.192	1.2384	1.6046	0.9808	2.2036	1.3367	1.9484	1.2213	1.8708	1.2402	1.5481	1.4377	1.3373	2.0551	1.3293	1.4561
53.4	1.6124	1.4886	2.7077	2.0078	0.9158	1.9619	1.2322	1.3629	1.3998	0.9812	1.8987	1.3067	1.6854	1.2066	1.9475	1.2449	1.4826	1.4946	1.4159	2.0592	1.2825	1.4895
53.5	1.5839	1.4274	2.5446	2.1062	0.8942	1.8435	1.3014	1.488	1.5836	1.0017	1.8146	1.3973	1.7926	1.2718	1.7915	1.3657	1.415	1.3785	1.3213	1.9784	1.2261	1.5504
53.6	1.7682	1.5819	2.358	2.3403	1.0572	2.1002	1.3051	1.2348	1.6186	0.9334	1.7117	1.3912	1.7059	1.2318	1.9104	1.4163	1.5734	1.7043	1.3646	1.8992	1.1096	1.5553
53.7	1.7178	1.4198	2.2465	2.2027	0.9913	1.9875	1.1677	1.4119	1.5304	0.9996	1.8675	1.5613	1.7804	1.3232	1.8322	1.1387	1.5541	1.4686	1.4484	2.0203	1.2626	1.5397
53.8	1.9259	1.4693	2.0864	2.1228	0.8545	2.6094	1.1912	1.316	1.4964	0.9013	1.7493	1.3875	1.8004	1.3428	1.8763	1.3311	1.638	1.4012	1.3009	1.8637	1.3464	1.5758
53.9	1.7908	1.5624	1.881	2.0029	0.8674	2.3874	1.1384	1.4467	1.4689	0.9472	1.6844	1.2956	1.6854	1.3245	1.7931	1.3064	1.407	1.2413	1.454	1.9742	1.4443	1.483
54	1.7168	1.4537	1.9546	2.1329	0.9523	2.0553	1.1875	1.2444	1.2915	0.9318	1.6534	1.2669	1.7355	1.268	1.6966	1.4093	1.5483	1.3162	1.5135	1.9781	1.2957	1.6507
54.1	1.571	1.5243	2.2189	2.3183	0.8638	2.1262	1.3616	1.3659	1.6125	0.9272	1.7711	1.4407	1.6748	1.3777	1.6775	1.1856	1.5983	1.416	1.1488	1.9002	1.3782	1.8789
54.2	1.6349	1.5801	2.2833	2.3726	0.9598	1.9897	1.1028	1.4159	1.4906	0.8895	1.9667	1.381	1.725	1.4276	1.8953	1.4223	1.5421	1.4834	1.2836	1.8795	1.431	1.6092
54.3	1.5134	1.5065	2.0077	2.0885	0.9514	2.1282	1.1222	1.4292	1.5402	0.9818	1.8113	1.3517	1.7167	1.4328	1.9063	1.2701	1.4989	1.5251	1.3548	2.1319	1.2575	1.6134
54.4	1.646	1.5058	2.2338	2.055	0.9131	1.9267	1.1652	1.4844	1.4388	0.9413	2.009	1.4694	1.7162	1.4258	1.9879	1.2688	1.7656	1.4819	1.3327	1.9349	1.3624	1.2381
54.5	1.5391	1.4789	2.1573	2.2418	1.0007	1.8287	1.033	1.4196	1.4666	0.9165	1.7824	1.3363	1.7219	1.3233	1.8884	1.1887	1.7631	1.5282	1.2928	1.9616	1.3434	1.2779
54.6	1.6085	1.4078	2.3129	2.2846	1.1692	1.8319	1.1956	1.3579	1.3204	0.8645	1.6815	1.4899	1.7856	1.3336	1.817	1.4799	1.7512	1.5718	1.3844	1.9159	1.2148	1.5983
54.7	1.6004	1.4077	2.1896	2.1584	1.0957	2.0812	1.1555	1.408	1.3723	0.8718	1.5738	1.4831	2.1439	1.2386	1.8607	1.3739	1.7916	1.4872	1.3245	2.1343	1.1209	1.5036
54.8	1.5271	1.5218	2.5684	2.2514	1.0299	2.2293	1.0273	1.4713	1.4517	1.0997	1.7118	1.4907	1.6566	1.2061	1.8149	1.4832	1.6584	1.731	1.4461	2.1016	1.2756	1.3795
54.9	1.8348	1.2734	2.5401	2.3612	0.9338	2.1401	1.2196	1.3418	1.5519	1.0934	1.8129	1.4282	1.7092	1.4697	1.9621	1.4906	1.4829	1.6528	1.4556	1.9787	1.1995	1.263
55	1.8176	1.3433	2.3389	2.253	0.8955	2.2095	1.2812	1.3589	1.5429	1.1033	1.8583	1.3944	1.8369	1.3333	1.691	1.3825	1.5862	1.6775	1.4242	2.0457	1.2795	1.5074
55.1	1.6574	1.4013	2.5254	2.3301	1.1014	1.9044	1.3542	1.3058	1.4713	0.9008	1.7847	1.4756	1.884	1.3355	1.7555	1.4747	1.8297	1.6296	1.1818	2.0292	1.2686	1.4119
55.2	1.5465	1.3745	2.6116	2.3242	0.9057	1.7514	1.3409	1.2466	1.4059	0.9816	1.8063	1.6907	1.9202	1.2935	2.1441	1.4195	1.6861	1.4787	1.2069	1.9545	1.1523	1.4417
55.3	1.5021	1.4191	2.7218	2.3027	0.853	1.9877	1.2436	1.3941	1.4177	0.9418	1.6236	1.471	1.8292	1.3264	1.8549	1.3146	1.4334	1.546	1.2443	2.0834	1.3892	1.4845
55.4	1.5813	1.3078	2.2767	2.3523	0.8051	1.7409	1.215	1.562	1.318	0.8613	1.7381	1.7123	1.7833	1.4266	1.79	1.5037	1.6317	1.7622	1.1974	1.9502	1.1955	2.0263
55.5	1.5666	1.4205	2.0196	2.1188	0.8172	2.213	1.3907	1.3448	1.4922	0.9963	1.9263	1.8504	1.9813	1.5442	1.9096	1.3831	1.4524	2.0442	1.235	2.0214	1.4805	1.9084
55.6	1.6412	1.3504	2.152	2.1315	0.9753	2.0629	1.3349	1.5446	1.4272	0.9508	1.8231	1.7296	1.899	1.5564	1.8568	1.2091	1.469	1.6054	1.3583	2.1012	1.362	2.0055
55.7	1.5882	1.4987	2.2295	2.2971	0.8021	1.8561	1.2601	1.6783	1.84	0.8962	1.8535	1.8411	1.864	1.6982	1.7914	1.2788	1.2984	1.6991	1.2596	1.8409	1.4855	2.1099
55.8	1.6185	1.4565	2.2235	2.1838	1.0074	2.1676	1.125	1.4412	1.3605	0.8106	1.6529	1.5394	1.9985	1.5548	1.8819	1.3637	1.6456	1.5134	1.2537	1.9287	1.6325	1.9007
55.9	1.8278	1.4347	2.1405	2.3383	0.9951	1.9736	1.1767	1.4864	1.4036	0.808	1.6879	1.5962	1.9755	1.3783	1.9103	1.2925	1.6107	1.5238	1.3775	2.0513	1.4811	2.0565
56	1.5729	1.3625	2.3409	2.3309	1.1032	2.0076	1.5559	1.4053	1.4348	0.9747	1.7862	1.5256	2.0577	1.3994	1.7469	1.3635	1.5043	1.5783	1.1108	1.9467	1.524	2.2616
56.1	1.6686	1.4244	2.187	2.2803	1.1673	1.971	1.261	1.5823	1.5964	0.9016	1.9544	2.0207	2.0091	1.3987	1.8352	1.4584	1.6892	1.6968	1.2904	1.8842	1.318	2.1632
56.2	1.6725	1.3679	2.6121	2.532	1.134	2.1791	1.2919	1.5717	1.6253	0.8577	1.967	1.8093	2.2105	1.6181	2.1803	1.3409	1.4844	1.657	1.345	2.0134	1.3146	2.2155
56.3	1.9714	1.2674	2.6689	2.4117	1.022	1.7526	1.4028	1.4821	1.563	0.9011	1.9014	1.8366	2.0066	1.3601	1.7598	1.4311	1.518	1.9921	1.3414	2.0204	1.3903	2.0156
56.4	1.825	1.5245	2.4567	2.3342	0.8474	2.0057	1.5619	1.509	1.6787	0.8865	1.8799	1.5112	1.9912	1.4139	1.8512	1.2303	1.5676	1.6039	1.2706	1.9817	1.3847	1.9376
56.5	1.6006	1.4321	2.2104	2.2329	0.7747	2.0884	1.2019	1.5091	1.6417	1.0921	1.7609	1.5375	1.92	1.4582	1.8724	1.4463	1.49	1.7771	1.2635	2.119	1.3318	2.1113
56.6	1.6226	1.4399	2.3384	2.0498	0.8112	1.9428	1.0499	1.4536	1.6521	0.9602	1.7958	1.5206	1.922	1.3257	1.6232	1.2158	1.5948	1.6958	1.271	2.1345	1.3296	2.0407
56.7	1.905	1.4079	2.4916	2.1089	0.8982	1.8638	1.2632	1.5195	1.6626	0.8458	1.6664	1.2073	2.3029	1.4715	1.8557	1.287	1.6067	1.6872	1.158	2.2036	1.2699	1.946
56.8	1.7049	1.5518	2.3589	1.9583	0.883	1.8171	1.0099	1.3439	1.6376	0.9298	1.7333	1.3061	2.1237	1.4051	1.7372	1.1622	1.6028	1.6335	1.2075	1.8517	1.3266	2.1485
56.9	1.533	1.4511	2.5693	1.8658	1.0912	1.848	1.1463	1.5657	1.6223	0.9864	1.7181	1.5571	1.8201	1.401	2.0163	1.2754	1.5993	1.8538	1.2552	2.0597	1.3203	2.0001
57	1.6171	1.4005	2.3004	2.4695	1.0417	1.8134	1.1284	1.5847	1.6142	0.9691	1.7036	1.4045	1.4965	1.278	1.771	1.2165	1.7503	1.7992	1.1763	1.9141	1.2322	2.3342
57.1	1.5717	1.3756	1.8937	2.3233	0.8245	1.7781	1.1426	1.331	1.5878	1.0065	1.7327	1.4223	1.8163	1.4012	1.754	1.2136	1.4788	1.6694	1.5646	2.0813	1.5324	1.9978
57.2	1.5084	1.4891	2.1125	2.5364	0.8095	1.743	1.2031	1.5096	1.6873	0.9074	1.8147	1.2982	1.8311	1.4883	1.8174	1.4242	1.6392	1.9499	1.5986	2.1581	1.3961	2.2552
57.3	1.7603	1.4275	2.3312	2.6258	0.8627	1.6863	1.2622	1.2822	1.5698	1.0027	1.7136	1.3863	1.7858	1.331	1.9995	1.2582	1.4938	1.8014	1.2932	1.8676	1.5219	1.9901
57.4	1.5613	1.5132	2.2309	2.5511	0.9829	1.7538	1.2994	1.2277	1.7138	1.0289	2.0062	1.5533	1.8074	1.2939	1.817	1.3464	1.8061	1.7179	1.5111	2.2295	1.3866	2.0325
57.5	1.5889	1.5174	2.2394	2.385	0.8536	2.0333	1.2865	1.5173	1.5444	0.7867	1.8067	1.7587	1.938	1.1643	1.8987	1.3398	1.4651	1.6858	1.1773	1.98	1.3227	2.0711
57.6	1.6217	1.4712	2.6196	2.3469	0.9323	1.8147	1.3539	1.7106	1.4171	0.9024	1.7923	1.4557	1.8881	1.0955	2.101	1.3948	1.6478	1.9666	1.2541	1.9257	1.4246	2.1809
57.7	1.6392	1.5071	2.3552	2.2362	0.885	1.9798	1.6664	1.6761	1.4635	0.8927	1.8834	1.3211	1.775	1.0816	1.8855	1.319	1.2924	1.8686	1.0543	1.8796	1.483	2.3209
57.8	1.8282	1.5473	2.0567	2.118	0.9187	2.1221	1.3797	1.591	1.6181	0.9953	1.8701	1.5054	1.6655	1.1261	2.0269	1.2526	1.3928	1.8608	1.4546	1.9006	1.5717	2.2634
57.9	1.5717	1.5801	2.2737	2.3375	1.0732	2.0559	1.4041	1.4772	1.5042	0.9055	1.9173	1.5175	1.9446	1.1811	1.954	1.1837	1.5911	1.7945	1.2364	2.0189	1.4877	2.343
58	1.6052	1.5132	2.1915	2.5696	0.8552	2.0162	1.5046	1.4668	1.4447	0.8727	1.6345	1.5713	1.9711	1.1909	1.9031	1.3616	1.7842	1.6196	1.2991	1.7844	1.295	2.1991
58.1	1.482	1.3962	1.8538	2.4823	0.9841	2.041	1.465	1.3175	1.5052	0.9449	1.8486	1.5096	1.7942	1.1552	1.9136	1.3175	1.7167	1.7363	1.3474	2.0215	1.2082	2.4987
58.2	1.7471	1.4066	1.9006	2.4933	0.9552	2.231	1.392	1.261	1.501	0.9655	1.8393	1.2415	1.9673	1.1374	1.918	1.4189	1.6288	1.8015	1.3748	1.8303	1.2694	2.4157
58.3	1.516	1.2905	1.9163	2.4055	0.8398	1.9553	1.3647	1.3756	1.5676	1.0795	1.8884	1.3047	1.7178	1.0346	1.7736	1.4238	1.8886	1.6178	1.2539	1.9859	1.3385	2.4543
58.4	1.457	1.381	1.9675	2.0861	0.9766	2.106	1.4431	1.5199	1.3066	0.7724	1.8352	1.3855	2.3001	1.1177	1.9159	1.4363	1.5579	1.5404	1.1856	2.0819	1.4699	2.4159
58.5	1.3236	1.3346	1.7179	2.2661	0.8144	1.9756	1.3714	1.2243	1.3222	1.3247	1.9594	1.4305	2.2317	1.1164	1.9495	1.3918	1.5319	1.851	1.2727	1.7744	1.3392	2.9077
58.6	1.428	1.5967	1.9287	2.1867	0.9078	1.8238	1.498	1.3374	1.4782	0.9715	1.9746	1.4963	2.0322	1.2375	2.0218	1.2721	1.6091	1.6511	1.4983	2.0221	1.4121	2.4837
58.7	1.5774	1.4562	1.9468	2.469	0.8996	1.864	1.325	1.46	1.4437	1.0476	1.8011	1.5868	2.228	1.2436	1.8286	1.4131	1.5445	1.5899	1.2734	2.1568	1.3019	2.7191
58.8	1.4072	1.7756	2.077	2.2857	0.9031	1.9008	1.1944	1.2711	1.385	1.0081	1.8063	1.4553	2.0487	1.2378	1.6925	1.3541	1.4925	1.6127	1.2552	1.8556	1.523	2.8425
58.9	1.6718	1.392	1.9135	2.4069	0.8586	1.6598	1.1359	1.4111	1.4414	0.8643	1.8368	1.2675	2.1296	1.2628	1.9303	1.2359	1.8651	1.5356	1.3898	1.669	1.2338	2.5676
59	1.5572	1.5238	1.7572	2.5328	0.9372	1.6531	1.1673	1.5056	1.4062	0.8747	2.0355	1.3956	1.9606	1.1072	2.0211	1.1793	1.7698	1.6492	1.4982	2.0951	1.3881	2.1773
59.1	1.2834	1.4554	2.0755	2.2823	1.0734	1.8491	1.0828	1.3289	1.536	1.0332	2.0363	1.403	1.9481	1.1063	1.884	1.2901	1.9324	1.6342	1.3775	2.0036	1.5105	2.3162
59.2	1.4008	1.5858	1.905	2.4047	1.1509	2.0215	1.1495	1.186	1.4072	0.9946	1.8994	1.7505	1.7998	1.1502	1.9636	1.1764	2.0766	1.6111	1.2926	1.9279	1.5253	1.9673
59.3	1.4732	1.6345	1.8969	2.2813	1.0085	1.8523	1.059	1.4083	1.3331	1.0196	2.0334	1.6295	1.7386	1.2377	1.8895	1.1765	2.0489	1.4774	1.401	1.9631	1.5273	2.0508
59.4	1.7429	1.6697	2.0766	2.3512	1.4065	1.945	1.2437	1.3487	1.3454	0.9695	1.8414	1.3081	2.0302	1.3157	1.7844	1.2276	1.7574	1.6822	1.3636	2.143	1.497	2.0167
59.5	1.7906	1.6375	1.8836	2.1262	1.2247	1.6423	1.3036	1.6114	1.4765	0.9786	1.9019	1.3587	2.0333	1.1252	1.918	1.2618	1.8137	1.573	1.441	1.8019	1.4781	2.2541
59.6	1.4562	1.4685	1.9517	2.0167	1.3258	1.9412	1.1704	1.5694	1.3768	0.9427	1.9397	1.4335	1.9838	1.0701	1.9184	1.5615	1.6181	1.699	1.5048	2.2163	1.4969	1.9728
59.7	2.0466	1.5141	2.0053	2.0491	0.92	2.1139	1.2042	1.4538	1.7035	0.9332	2.137	1.4607	1.9775	1.2242	2.0434	1.2216	1.7616	1.5611	1.368	2.4024	1.3439	1.7376
59.8	1.9342	1.4776	2.0152	2.0349	1.177	2.0882	1.2187	1.3616	1.4897	1.0625	1.8823	1.6653	2.2501	1.0466	2.0057	1.2496	1.7158	1.6767	1.2669	2.2247	1.1374	1.7551
59.9	2.1097	1.5546	2.2625	2.2399	0.937	2.0935	1.1864	1.3406	1.486	1.0151	1.8294	1.6425	1.9481	1.2312	1.7847	1.2588	1.6708	1.6756	1.2007	2.0884	1.3913	2.0707
60	2.3229	1.4372	1.9615	2.3172	1.0722	2.0304	1.1724	1.4918	1.6678	0.9789	1.9751	1.7118	1.8655	1.077	1.6723	1.2898	1.717	1.5631	1.2371	2.0146	1.3383	2.0734
60.1	1.9167	1.5148	2.0438	2.303	1.2337	1.8812	1.2439	1.452	1.679	0.8961	1.8816	1.6158	1.8764	1.2573	1.8505	1.1036	1.7547	1.6331	1.3964	2.0355	1.2971	2.0468
60.2	1.7826	1.4575	2.0288	2.4205	1.1021	1.9048	1.24	1.4798	1.7026	1.0052	1.7658	1.6221	1.989	1.3253	1.734	1.0943	1.9537	1.5888	1.3591	2.0206	1.3235	1.9621
60.3	1.9094	1.429	1.9152	2.5742	0.8506	1.9019	1.1851	1.3423	1.5935	0.7883	1.8278	1.6465	2.13	1.3607	1.7995	1.326	1.6675	1.7462	1.4701	2.0574	1.188	2.0975
60.4	1.7833	1.5299	2.1136	2.5075	1.2668	1.6206	1.1832	1.5141	1.6607	0.8881	1.7874	1.7583	2.2215	1.5711	1.697	1.159	1.7006	1.4811	1.21	1.8444	1.0876	2.1363
60.5	2.0135	1.5594	2.2082	2.5899	0.8677	1.9141	1.2827	1.2536	1.7781	0.9848	1.8762	1.8043	1.7252	1.2036	1.6288	1.6475	1.8747	1.3736	1.1703	1.806	1.1623	2.2561
60.6	1.9886	1.435	2.2299	2.5528	1.0408	1.5359	1.2283	1.4963	1.5251	0.9485	1.9609	1.6378	1.9665	1.09	1.6323	1.3	1.7597	1.396	1.1644	1.8543	1.2439	2.08
60.7	1.9309	1.3514	1.845	2.456	0.9095	1.7655	1.1582	1.3342	1.5609	0.9122	2.069	1.4898	2.1577	1.204	1.8451	1.275	1.9785	1.3918	1.2873	2.0563	1.3296	2.3075
60.8	1.7798	1.616	2.3179	2.2624	0.9066	1.9672	1.171	1.4088	1.4611	1.0727	1.9062	1.5488	1.8729	1.4266	1.923	1.428	1.8077	1.5796	1.2142	2.091	1.4105	2.1718
60.9	1.7963	1.6245	1.9812	2.0974	0.7907	1.946	1.2733	1.2191	1.6096	1.083	1.9042	1.4318	2.1587	1.4186	1.7997	1.2634	1.8108	1.6506	1.577	2.0976	1.3114	1.9998
61	1.8749	1.5418	2.2007	2.1871	0.8381	1.7818	1.2706	1.4432	1.4923	1.0677	1.9618	1.6157	1.9494	1.4184	1.6783	1.349	1.6801	1.6337	1.253	2.0119	1.2059	1.7152
61.1	1.7882	1.7144	2.0335	2.3515	0.9121	1.9451	1.2371	1.3364	1.8635	0.9361	1.8331	1.4831	2.0391	1.2578	1.9482	1.2569	2.0216	1.4538	1.1959	2.0998	1.2277	2.1359
61.2	1.5301	1.7581	2.1057	2.3209	0.8525	1.8501	1.1027	1.2579	1.7019	1.2814	1.9497	1.6913	1.9926	1.4475	2.0262	1.1292	1.7887	1.6215	1.2669	1.8611	1.1962	1.9733
61.3	1.8208	1.7195	2.0256	2.5111	0.7727	1.7018	1.1677	1.6039	1.5989	0.9824	1.6953	1.5416	2.2078	1.2393	1.9412	1.1883	1.9739	1.4039	1.3754	2.0831	1.2057	2.1353
61.4	1.7451	1.6371	2.1087	2.4729	0.9496	1.8737	1.2578	1.7227	1.6148	1.0059	2.1132	1.4725	1.9989	1.3332	1.8817	1.1403	1.8588	1.721	1.2107	1.9981	1.4931	1.9677
61.5	1.5206	1.5621	2.3191	2.2033	0.7593	1.8912	1.3416	1.5226	1.4676	1.0026	1.6527	1.6006	2.2099	1.3923	1.8756	1.1542	1.8157	1.6332	1.3743	2.0221	1.1219	2.3006
61.6	1.6594	1.5594	2.0378	2.0894	0.8515	2.0649	1.2979	1.5475	1.4706	0.9249	2.2344	1.8038	1.9634	1.5398	1.8783	1.331	1.7764	1.4072	1.4235	2.0094	1.1676	2.0469
61.7	1.5899	1.6359	1.8592	2.4053	0.8157	2.0977	1.1804	1.5441	1.7038	1.0528	1.5149	1.3519	1.8821	1.4085	1.8351	1.314	1.8486	1.5999	1.6104	2.115	1.3776	2.0678
61.8	1.5311	1.6524	2.185	2.1834	0.8855	1.8114	1.1561	1.5808	1.763	0.9888	1.555	1.536	1.7378	1.5997	1.8206	1.2464	1.997	1.5707	1.5038	2.3559	1.5341	2.1715
61.9	1.4965	1.3818	2.3372	2.0489	0.9801	1.8067	1.2552	1.5767	1.6204	1.188	1.5108	1.5268	1.7382	1.3162	1.7938	1.2157	2.2141	1.6004	1.5838	2.1028	1.5804	2.3977
62	1.502	1.4859	2.0955	1.7743	1.1453	2.165	1.2676	1.5578	1.53	1.2241	1.5054	1.177	1.8961	1.3896	2.02	1.283	1.8067	1.4478	1.4062	2.0846	1.3201	2.1863
62.1	1.4954	1.2758	2.0691	2.1103	1.1331	2.0654	1.2625	1.6326	1.4939	1.1013	1.3955	1.3051	1.9497	1.324	1.9347	1.3055	1.9934	1.5589	1.6182	2.196	1.7063	2.2351
62.2	1.5445	1.571	2.2665	2.2275	1.023	2.098	1.1205	1.4178	1.7143	1.109	1.582	1.151	1.9039	1.3722	1.7978	1.255	1.8947	1.6224	1.3987	2.2037	1.6022	2.2618
62.3	1.6083	1.5112	2.2803	2.0979	0.9093	1.9739	1.23	1.4282	1.5806	1.0248	1.525	1.4267	1.7548	1.6215	1.5989	1.0189	2.1411	1.6257	1.2705	2.018	1.0845	2.2025
62.4	1.5951	1.4823	2.1577	2.0789	0.9318	2.0143	1.1971	1.4511	1.7356	1.3761	1.3964	1.1146	1.9929	1.6431	1.6497	1.157	1.9715	1.6404	1.2797	1.9575	1.5768	2.1554
62.5	1.4792	1.4126	1.8894	2.11	1.0763	2.2501	1.1888	1.5077	1.7539	0.9921	1.5153	1.0921	1.932	1.4831	1.5253	1.4097	2.055	1.5987	1.3408	2.058	1.197	2.4822
62.6	1.6037	1.7103	2.2287	2.1716	0.8702	2.0384	1.2853	1.4958	1.6593	0.8516	1.5163	1.0564	1.9401	1.3429	1.6733	1.389	1.8593	1.5776	1.3519	2.0299	1.5096	2.359
62.7	1.5666	1.7393	2.285	1.9935	0.8626	1.8276	1.4009	1.5421	1.7172	0.9631	1.6447	1.2106	1.9778	1.2922	1.833	1.2304	1.8553	1.4983	1.3852	2.0732	1.424	2.3052
62.8	1.6994	1.5659	2.6417	2.2013	0.8454	1.8888	1.1081	1.5169	1.5485	1.2546	1.6339	1.2358	2.0936	1.5608	1.7766	1.1873	1.8178	1.5808	1.2598	2.1447	1.6215	2.2628
62.9	1.5087	1.5091	2.4385	2.1034	1.0146	2.0188	1.1392	1.4426	1.5613	0.9116	1.5257	1.058	1.7021	1.3867	1.9242	1.351	1.814	1.5188	1.4633	2.0753	1.625	2.2931
63	1.7029	1.8741	2.2545	2.1107	0.9404	2.119	1.5077	1.6091	1.6154	1.0487	1.613	1.2481	1.7607	1.4812	1.5892	1.1804	1.768	1.6129	1.1827	1.9568	1.6367	2.0459
63.1	1.6472	1.7431	2.5111	2.2413	1.0432	2.1307	1.334	1.5353	1.4915	0.9162	1.398	1.2118	1.8359	1.2612	1.5757	1.2337	1.7735	1.6338	1.4042	2.0987	1.2592	2.1124
63.2	1.9006	1.7234	2.2309	2.1884	0.9033	2.3283	1.2877	1.5616	1.4806	1.2688	1.7608	1.1169	1.8018	1.2113	1.6376	1.4239	1.8094	1.5977	1.4685	2.0777	1.3638	2.2076
63.3	1.9603	1.6839	2.3692	2.4622	0.9701	1.7921	1.2823	1.7836	1.7655	1.0817	1.8386	1.0791	1.8244	1.3281	1.7057	1.352	1.7862	1.5749	1.285	1.9737	1.5876	2.1009
63.4	1.8011	1.6264	2.1904	2.253	1.0983	1.8069	1.3789	1.3652	1.8494	1.0618	1.877	1.1942	1.7525	1.2901	1.4994	1.3163	1.8621	1.745	1.4831	1.9645	1.4213	2.2383
63.5	1.7444	1.6645	2.2072	2.5188	1.1219	1.7561	1.4513	1.5053	1.5214	0.9788	1.7094	1.2968	1.6477	1.3858	1.7596	1.6646	1.8003	1.6728	1.2905	1.9583	1.361	2.2321
63.6	1.5672	1.2538	2.4066	2.1727	1.119	1.8429	1.2739	1.5267	1.5616	1.129	1.9352	1.1945	1.6074	1.4234	1.6585	1.2008	1.7942	1.4713	1.3832	1.9129	1.6678	2.3702
63.7	1.6099	1.4464	2.4094	1.9793	0.9482	1.7977	1.4213	1.5179	1.6955	1.2078	1.8546	1.0886	1.7166	1.2115	1.5322	1.4483	1.6562	1.4874	1.5584	1.8125	1.392	2.3373
63.8	1.535	1.5802	2.2752	2.3315	1.0445	1.8152	1.3952	1.4117	1.7985	1.1391	1.7904	1.0094	1.7676	1.2536	1.7009	1.1612	1.8393	1.6064	1.4026	1.8775	1.4928	2.3912
63.9	1.5625	1.4117	2.6147	2.2513	1.1756	1.7704	1.455	1.566	1.6901	1.2503	1.7549	1.1778	1.78	1.0376	1.6232	1.2504	1.7567	1.5504	1.4313	1.9286	1.5262	2.3962
64	1.7153	1.5296	2.6474	2.3075	0.98	1.9118	1.2307	1.6095	1.5577	1.2923	1.9527	1.1348	1.9011	1.2197	1.5885	1.2905	1.7952	1.6258	1.4342	1.8786	1.5794	1.8829
64.1	1.5806	1.6166	2.4595	2.2787	1.0681	1.8952	1.2527	1.6565	1.7663	1.1644	1.9596	0.9243	1.7899	1.2162	1.6715	1.1562	1.6893	1.3889	1.398	2.0044	1.389	2.0598
64.2	1.8694	1.4883	2.3706	2.2413	1.0599	1.7237	1.1938	1.5503	1.6612	1.1925	1.7638	1.0738	1.9858	1.1204	1.5381	1.2307	1.5868	1.5274	1.3466	1.8636	1.2539	2.1243
64.3	1.5771	1.5412	2.472	2.285	1.0721	1.7958	1.1693	1.3904	1.4236	1.085	1.6633	1.0478	1.9187	1.1161	1.6488	1.3275	1.8402	1.5001	1.72	1.8981	1.5451	2.1517
64.4	1.6674	1.4735	2.5772	2.3851	0.9612	1.9362	1.4017	1.4906	1.4388	1.1949	2.0261	1.0824	1.645	1.279	1.6448	1.3767	1.8315	1.5627	1.346	2.3753	1.6583	2.0409
64.5	1.6278	1.5035	2.5722	2.7043	0.9098	2.0344	1.2003	1.41	1.4347	1.1901	1.9783	1.1143	1.8473	1.0901	1.5711	1.3374	1.6668	1.5058	1.5322	1.9575	1.6047	2.0699
64.6	1.6702	1.5714	2.5506	2.5173	1.335	1.8728	1.4009	1.5629	1.4468	1.0616	1.7759	1.363	1.7551	1.1264	1.748	1.276	1.768	1.5002	1.4032	2.0962	1.1794	1.9327
64.7	1.8126	1.4775	2.405	2.2362	1.0407	1.6281	1.3886	1.5581	1.6926	1.1888	1.8957	1.0746	1.8583	1.1978	1.6961	1.2984	1.7205	1.6461	1.4157	1.9465	1.3514	2.3039
64.8	1.7345	1.7295	2.1763	2.3833	0.9226	1.7225	1.0926	1.5657	1.5391	1.1128	1.9201	1.1349	1.8655	1.1697	1.48	1.2832	1.7941	1.6434	1.2005	2.065	1.5475	2.2255
64.9	1.715	1.5795	2.4543	2.2025	0.9559	1.7914	1.1395	1.4631	1.6229	1.2919	2.0098	1.0785	1.7656	1.1611	1.737	1.3108	1.9208	1.6451	1.4138	2.2672	1.4849	2.1975
65	1.8399	1.4569	2.6226	2.2771	0.896	1.9153	1.2816	1.5423	1.5399	1.4328	1.739	1.1909	1.6702	1.1219	1.7987	1.3809	1.7741	1.6047	1.4197	2.1947	1.6256	2.1202
65.1	1.6365	1.3348	2.729	2.1736	1.0965	1.7826	1.2936	1.2989	1.4783	1.2385	1.9212	1.0664	2.1026	1.1745	1.802	1.4547	1.8828	1.3952	1.2865	2.212	1.4171	2.4726
65.2	1.6281	1.455	2.6694	2.1712	1.0617	1.9294	1.2842	1.3962	1.5241	1.5519	1.6793	1.1949	1.8312	1.0867	1.7701	1.393	1.8677	1.5097	1.3451	2.1749	1.5365	2.1381
65.3	1.651	1.5406	2.7205	2.1688	1.191	2.0429	1.2073	1.5672	1.4377	1.7523	1.8448	1.326	1.9388	1.2755	1.5242	1.3462	1.6207	1.4503	1.5518	2.1284	1.5349	2.3503
65.4	1.6622	1.4537	2.6207	2.2433	0.9765	1.8764	1.1657	1.3754	1.3767	1.5235	1.8252	1.0962	1.6086	1.207	1.6385	1.1421	1.7445	1.4655	1.4655	2.1701	1.6199	2.1617
65.5	1.5613	1.5428	2.683	2.3373	0.9036	2.0104	1.2929	1.3573	1.4572	1.341	1.8195	1.3829	1.9945	1.2378	1.5968	1.5332	1.582	1.7226	1.5374	2.7534	1.4688	2.2542
65.6	1.5487	1.3643	2.6209	2.2597	1.1229	1.6937	1.3069	1.5159	1.5093	1.1192	1.9362	1.1345	1.8298	1.3713	1.5546	1.2531	1.6921	1.6511	1.6418	2.3321	1.508	2.1718
65.7	1.6054	1.3529	2.871	2.4112	0.9059	1.9475	1.2358	1.5675	1.4807	1.2499	1.9023	1.1815	1.7743	1.2614	1.6407	1.3102	1.8002	1.3833	1.6678	2.004	1.324	2.1523
65.8	1.5918	1.3072	2.5813	2.4195	0.9667	2.4632	1.3599	1.5596	1.5778	1.2401	2.0368	1.2714	1.8098	1.182	1.6362	1.3853	1.8169	1.3668	1.47	2.1176	1.768	2.079
65.9	1.6713	1.4792	2.7503	2.5681	0.9244	2.3144	1.2972	1.4729	1.5121	1.0987	1.9803	1.379	1.7325	1.1832	1.6025	1.4114	1.8682	1.4448	1.7167	1.9618	1.3618	2.3195
66	1.599	1.2099	2.6949	2.5702	0.8754	2.056	1.1735	1.3671	1.4709	1.0281	1.9328	1.2674	1.7211	1.3055	1.5639	1.2715	1.8127	1.3434	1.4362	2.2055	1.4817	2.1953
66.1	1.6506	1.3788	2.441	2.4941	0.9723	2.2061	1.2252	1.5163	1.3422	1.1279	1.923	1.1811	1.7746	1.4162	1.5766	1.4826	1.9214	1.4741	1.5527	2.2563	1.6157	2.183
66.2	1.465	1.3095	2.5968	2.4334	1.0323	2.2737	1.2087	1.3439	1.4806	0.9126	1.828	1.2049	1.7732	1.2812	1.7064	1.5381	1.8439	1.4275	1.5593	2.0719	1.417	2.1671
66.3	1.348	1.3295	2.3656	2.4031	1.1664	2.0768	1.2175	1.4543	1.3477	0.9863	1.8667	1.3739	1.9906	1.4705	1.7216	1.7139	1.9054	1.6436	1.6371	1.9924	1.3626	2.2762
66.4	1.5741	1.4106	2.6034	2.7354	0.9272	2.1407	1.3203	1.5154	1.479	1.1554	1.9121	1.2071	1.8638	1.3172	1.5307	1.2816	1.6187	1.5659	1.4275	2.1718	1.4955	2.2223
66.5	1.5221	1.3191	2.8032	2.5362	0.8443	2.1189	1.3599	1.3578	1.4503	1.1478	1.9043	1.2497	1.8054	1.3966	1.6304	1.3461	1.8387	1.5093	1.5597	1.9869	1.4135	2.2762
66.6	1.4835	1.3644	2.5126	2.2929	0.8227	2.2498	1.0647	1.5187	1.4675	1.0379	1.8007	1.0968	1.6783	1.4969	1.4521	1.2034	1.7428	1.3857	1.6285	2.1307	1.7254	2.3317
66.7	1.5486	1.301	2.603	2.556	0.9515	2.0341	1.1251	1.3742	1.5146	1.1776	1.8901	1.4047	1.5452	1.3663	1.6668	1.4085	1.8105	1.4639	1.6878	1.9895	1.4071	2.3565
66.8	1.8075	1.5939	2.6339	2.3382	0.8087	2.0585	1.2647	1.3735	1.5317	0.9794	1.708	1.1044	1.9559	1.5334	1.5667	1.5645	1.6462	1.4572	1.5646	2.1271	1.323	2.3716
66.9	1.7181	1.5402	2.7927	2.405	0.7806	1.8117	1.1841	1.4088	1.5208	0.959	1.5929	1.2344	1.8134	1.3757	1.6258	1.5038	1.6034	1.613	1.5149	2.3078	1.4076	2.4302
67	2.1053	1.408	2.5726	2.2236	0.8422	1.8395	1.2873	1.4566	1.4744	1.0391	1.67	1.3232	1.7209	1.3269	1.6203	1.3666	1.6854	1.7164	1.6135	2.1849	1.506	2.3117
67.1	1.7033	1.4573	2.8173	2.2694	0.9584	1.7391	1.2219	1.5366	1.4202	1.2548	1.6519	1.1753	1.8287	1.3607	1.5545	1.5288	1.6558	1.5487	1.7561	1.884	1.6812	2.2673
67.2	1.7773	1.3445	2.4643	2.2997	0.9486	1.6105	1.2307	1.3389	1.47	1.2064	1.8556	1.2494	1.8914	1.4762	1.4207	1.7159	1.4685	1.6129	1.5443	2.3822	1.4566	2.0914
67.3	1.7049	1.528	2.7735	2.5175	0.8802	1.8089	1.2003	1.4646	1.5981	1.2085	1.7888	1.0474	2.0116	1.283	1.7112	1.4315	1.6046	1.68	1.4803	2.2143	1.4175	2.2137
67.4	1.718	1.5673	2.7449	2.5412	1.0264	1.8649	1.2019	1.4496	1.6346	1.1219	1.6137	1.2622	1.8644	1.2398	1.5924	1.4981	1.6376	1.5677	1.596	2.1885	1.3376	2.213
67.5	1.6463	1.6231	2.876	2.3676	0.8232	1.8549	1.1919	1.7645	1.4631	1.0643	1.7592	1.0523	1.7628	1.1998	1.4956	1.2809	1.8389	1.6451	1.6392	1.9665	1.2336	2.1755
67.6	1.5508	1.5518	2.9194	2.1779	0.9822	1.8573	1.296	1.544	1.592	1.1245	1.9839	1.0868	1.6819	1.2841	1.5449	1.5038	1.6802	1.5595	1.4849	2.0624	1.2463	2.0986
67.7	1.4746	1.3336	2.8625	2.3551	0.7944	1.9805	1.352	1.5851	1.5254	1.0738	2.0026	1.1202	1.7746	1.2933	1.5654	1.4043	1.9268	1.5998	1.4199	2.0161	1.4568	2.0956
67.8	1.482	1.7001	2.7272	2.5343	0.9342	2.0553	1.2447	1.4198	1.4997	1.1626	1.8579	1.2171	1.8573	1.1635	1.5965	1.4179	1.7757	1.6174	1.5768	1.9647	1.2492	2.095
67.9	1.7004	1.5708	2.6688	2.3585	0.8405	1.9423	1.2365	1.6788	1.5102	1.1369	2.1441	1.3279	1.7833	1.174	1.5537	1.4773	1.5758	1.5651	1.3226	1.9978	1.4423	2.4306
68	1.8566	1.4356	2.7312	2.4446	0.7391	1.7891	1.2205	1.4263	1.5647	1.1208	1.8245	1.0578	1.8838	1.136	1.5393	1.4067	1.6339	1.6213	1.2014	2.0452	1.3559	2.1063
68.1	1.7452	1.5906	2.8303	2.4724	0.8365	1.6688	1.1009	1.6262	1.5312	1.2211	1.9436	0.9781	1.8904	1.1823	1.6915	1.4821	1.6588	1.7404	1.3646	2.0213	1.5737	2.4342
68.2	1.7305	1.4942	2.4443	2.2554	0.8852	1.7507	1.1431	1.5831	1.621	1.3904	2.0402	1.0016	1.8482	1.1076	1.4687	1.7061	1.7019	1.4978	1.4117	2.3095	1.369	2.2488
68.3	1.5213	1.4697	2.5459	2.3367	0.9201	1.9555	1.1419	1.4252	1.6454	1.3278	2.1726	1.1137	1.8121	1.044	1.4855	1.5193	1.8047	1.4934	1.5569	1.9741	1.5506	2.2423
68.4	1.6948	1.5487	2.555	2.4627	0.8486	2.2266	1.2996	1.5391	1.4988	1.5246	2.1658	0.992	1.7468	1.1899	1.6231	1.4645	1.8896	1.5069	1.5021	2.3055	1.3102	2.0865
68.5	1.5419	1.5782	2.8983	2.4215	0.7269	2.5422	1.2442	1.7038	1.6287	1.2461	1.8661	1.0638	1.8815	1.081	1.4865	1.6369	2.0348	1.5519	1.5922	2.4065	1.7097	1.8065
68.6	1.6646	1.4104	2.6728	2.4277	0.9658	1.8899	1.1971	1.614	1.5385	1.4201	1.9322	1.057	1.753	1.1448	1.5307	1.7978	1.7237	1.4725	1.4933	2.0669	1.5471	1.8849
68.7	1.5963	1.2441	2.7856	2.3269	0.7799	1.9027	1.3078	1.8516	1.5049	1.2575	1.9615	1.0529	1.6416	1.0232	1.5277	1.754	1.6884	1.5921	1.375	2.1071	1.5681	1.8484
68.8	1.8672	1.5096	2.5087	2.3446	0.9557	2.0509	1.122	1.7678	1.5649	1.3385	2.0905	1.0012	1.8149	1.1252	1.5778	1.8407	1.7262	1.6286	1.4972	2.2362	1.1738	1.8665
68.9	1.9098	1.3684	2.7317	2.3918	0.7853	2.2386	1.2875	1.5307	1.4956	1.1368	2.0554	1.0859	1.7828	1.2163	1.5703	1.7575	1.673	1.5355	1.2612	2.2991	1.6775	1.9554
69	1.565	1.123	2.5741	2.0376	0.8196	2.0157	1.2602	1.5606	1.5392	1.1626	2.0032	1.1439	1.812	1.2337	1.5292	1.8117	1.6702	1.4713	1.1857	2.2382	1.4765	2.1116
69.1	1.5887	1.2636	2.6335	2.3674	0.7375	2.1973	1.2738	1.4358	1.603	1.3095	2.1247	1.2252	1.8684	1.5444	1.545	1.8731	1.7426	1.479	1.4219	2.1463	1.3432	2.0397
69.2	1.5981	1.3435	2.7291	2.3535	0.725	2.0022	1.2781	1.5925	1.6749	1.198	2.2307	0.9835	1.9633	1.3536	1.496	1.7768	1.7553	1.5159	1.342	1.9664	1.2639	2.3681
69.3	1.4491	1.3963	2.8015	2.6458	0.836	2.0897	1.2791	1.6064	1.4166	1.1243	2.1519	1.075	1.9194	1.1629	1.7572	1.6639	1.9409	1.4384	1.4463	2.036	1.6819	2.1245
69.4	1.913	1.4916	2.6519	2.7144	0.6999	1.9733	1.2408	1.5351	1.4925	1.1712	2.1629	1.2154	1.7262	1.1316	1.4651	1.69	1.6256	1.4936	1.374	2.2208	1.5639	1.9847
69.5	1.5925	1.5241	2.4399	2.6333	0.7845	2.1036	1.2344	1.612	1.5128	1.1285	2.1348	1.3985	1.619	1.1612	1.6016	1.5584	1.6733	1.4778	1.2546	2.2145	1.7254	2.019
69.6	1.6798	1.328	2.6841	2.6478	1.0056	1.8621	1.2058	1.777	1.5428	1.437	1.9955	1.4142	1.8117	1.2273	1.4216	1.6901	1.7072	1.4618	1.5291	2.1334	1.7354	1.83
69.7	1.6713	1.2395	2.6773	2.3001	0.7626	1.9045	1.2684	1.6758	1.4506	1.1029	2.2374	1.4055	1.7207	1.2488	1.3811	1.4162	1.5701	1.4611	1.363	2.1118	1.7064	1.6625
69.8	1.6338	1.2403	2.6063	2.4041	0.6963	2.1419	1.2404	1.649	1.3971	1.1483	2.1936	1.3808	1.9601	1.1836	1.3793	1.4356	1.6283	1.5291	1.2084	2.1586	1.5276	1.7612
69.9	1.6982	1.5518	2.5172	2.3471	1.0075	1.6653	1.1388	1.5502	1.5453	1.1246	2.1834	1.3768	1.6251	1.2288	1.5389	1.7339	1.5884	1.6087	1.3821	2.0487	1.4571	1.7696
70	1.609	1.4389	2.7429	2.3703	0.8086	1.7033	1.1504	1.3684	1.4214	1.2853	1.9344	1.4751	1.5848	1.1497	1.4565	1.8253	1.4295	1.4087	1.2873	2.0073	1.5287	1.8016
70.1	1.5964	1.3701	2.4784	1.9739	0.8527	1.8575	1.0922	1.5999	1.6359	1.368	2.0468	1.4881	1.934	1.1549	1.428	1.663	1.4649	1.3213	1.2659	2.0576	1.5209	1.6276
70.2	1.6219	1.3908	2.5832	1.9853	0.7405	2.0507	1.242	1.3429	1.6061	1.1748	2.1344	1.3715	1.9816	1.0745	1.5346	1.6961	1.5886	1.2943	1.2359	2.202	1.4699	1.5864
70.3	1.667	1.2299	2.3014	2.1573	0.7975	1.9782	1.079	1.5508	1.6349	0.9019	2.0219	1.2962	1.8806	1.0836	1.3845	1.6062	1.4825	1.3551	1.5467	2.0862	1.3979	1.5858
70.4	1.6412	1.2781	2.8749	2.1809	0.7819	1.7847	1.1904	1.6541	1.5848	1.0315	1.978	1.2861	2.0078	1.1583	1.4437	1.5839	1.3804	1.4021	1.4336	2.0171	1.3301	1.6071
70.5	1.5365	1.3679	2.4864	2.3846	0.7426	1.907	1.1962	1.5427	1.5722	0.9645	1.9407	1.5184	1.8347	1.1478	1.5734	1.5622	1.7613	1.4849	1.4614	1.7903	1.8044	1.9772
70.6	1.5076	1.4278	2.8662	2.2668	1.0033	1.9341	1.2382	1.6013	1.6116	1.2547	1.9422	1.3745	1.9675	1.0717	1.4918	1.4968	1.5103	1.3411	1.3629	1.7034	1.4387	2.0707
70.7	1.7137	1.3536	2.804	2.2852	0.9691	2.0604	1.2044	1.6808	1.4736	0.9389	1.9829	1.2355	1.6479	1.0173	1.461	1.7015	1.4823	1.4772	1.6361	1.8476	1.4484	1.8599
70.8	1.4072	1.3319	2.6914	2.5098	0.8702	1.9992	1.1725	1.5961	1.5456	0.9064	1.9653	1.6755	1.8045	1.2147	1.479	1.719	1.6217	1.5627	1.2963	1.8753	1.4518	1.9407
70.9	1.4114	1.414	2.9704	2.4271	0.7728	2.1572	1.2135	1.6635	1.3655	0.9139	1.8468	1.5435	2.1821	1.1655	1.472	1.9158	1.7013	1.7957	1.4088	2.0019	1.6673	2.0814
71	1.3107	1.4419	2.9606	2.4125	0.8148	1.8252	1.0868	1.6355	1.4175	0.9636	1.9539	1.2555	1.8317	1.1926	1.6274	1.5232	1.6233	1.5424	1.5834	1.9187	1.5168	1.7391
71.1	1.3783	1.5514	2.7755	2.568	0.8336	1.7797	1.3101	1.3954	1.667	1.2018	2.0881	1.6341	1.7085	1.1697	1.5817	1.636	1.7334	1.547	1.3291	1.9573	1.53	2.0115
71.2	1.5967	1.4571	2.6864	2.2341	0.8649	1.6524	1.2597	1.674	1.6984	1.1577	1.9721	1.4842	1.7575	1.1046	1.4984	1.6521	1.5511	1.3363	1.2733	1.8314	1.4049	2.0955
71.3	1.3923	1.4783	2.7178	2.1716	0.8604	1.6634	1.2607	1.581	1.6178	0.9533	2.1473	1.3969	1.9179	1.2155	1.5651	1.6862	1.5705	1.3668	1.2992	2.1115	1.6024	2.0083
71.4	1.6663	1.3087	2.3973	2.3252	0.7168	1.7348	1.3563	1.6997	1.486	1.1331	2.0234	1.3087	1.8943	1.2093	1.4249	1.6019	1.7361	1.456	1.5647	1.7688	1.5883	2.1627
71.5	1.5373	1.223	2.5952	2.2996	0.8479	1.8476	1.244	1.7212	1.6335	1.0438	1.9654	1.3166	2.0334	1.2836	1.4215	1.7387	1.478	1.4993	1.3202	1.8069	1.5848	1.9985
71.6	1.4847	1.223	2.7814	2.2576	0.8817	1.8527	1.3006	1.5659	1.6578	1.1404	1.9827	1.3607	1.7107	1.1854	1.4388	1.7821	1.492	1.51	1.3369	1.9479	1.7486	1.8071
71.7	1.5598	1.343	2.7532	2.2829	0.7607	1.8286	1.2321	1.4188	1.5753	1.0826	1.8967	1.2804	1.8593	1.2534	1.4074	1.5895	1.538	1.6839	1.4129	1.887	1.3974	1.9481
71.8	1.4049	1.3598	2.6848	2.2731	0.918	1.917	1.2749	1.5711	1.6765	1.1994	2.0781	1.3529	1.7448	1.1171	1.449	1.5913	1.6661	1.531	1.3568	1.7989	1.6335	2.0164
71.9	1.6585	1.3212	2.5128	2.2604	0.8022	1.7324	1.3647	1.4529	1.5932	1.0483	2.0231	1.391	1.7249	1.2974	1.4593	1.5959	1.4628	1.8288	1.2519	1.9179	1.7715	2.053
72	1.4451	1.2905	2.7949	2.2566	0.9093	1.8202	1.2042	1.6151	1.6004	1.3571	1.9896	1.1729	1.7991	1.1492	1.6254	1.7134	1.4568	1.7383	1.4234	1.9175	1.6151	1.7657
72.1	1.4733	1.377	2.9138	2.1918	0.8693	1.658	1.3931	1.556	1.5238	1.0932	1.9915	1.2959	1.8535	1.1931	1.5544	1.5345	1.7063	1.7947	1.6427	1.6177	1.7128	2.0446
72.2	1.4536	1.3432	2.7721	2.2184	0.9029	1.7497	1.2909	1.5354	1.4372	1.2309	1.9351	1.3593	1.8436	1.202	1.6713	1.4808	1.3868	1.9175	1.6064	1.8408	1.6398	1.9854
72.3	1.6266	1.2039	2.7336	2.1621	0.7535	1.7141	1.28	1.5461	1.5646	1.2443	2.0509	1.2354	1.889	1.2695	1.5228	1.4371	1.7348	1.57	1.6586	1.8807	1.6587	2.0716
72.4	1.395	1.214	2.6205	2.1161	0.861	1.5834	1.3018	1.4573	1.6361	1.1009	2.0705	1.1059	1.7831	1.5195	1.4864	1.5382	1.7309	1.6825	1.5513	2.0386	1.5607	1.9219
72.5	1.4005	1.3225	2.5604	2.277	0.8325	1.6626	1.2006	1.6075	1.6413	1.2965	2.3607	1.1599	1.7134	1.2738	1.4957	1.4805	1.4737	1.5338	1.6261	1.9986	1.7048	1.7739
72.6	1.1357	1.3168	2.5236	2.2358	0.8977	1.9687	1.3273	1.5543	1.5062	1.1628	2.0821	1.0979	1.6793	1.2086	1.4136	1.5775	1.7391	1.7272	1.5154	2.1778	1.7836	1.8163
72.7	1.3046	1.243	2.9105	2.2516	0.8542	1.9591	1.2421	1.7381	1.5628	1.1674	2.1364	1.3547	1.7536	1.0553	1.7339	1.6682	1.9118	1.6087	1.4657	2.0732	1.7004	1.6603
72.8	1.4164	1.2611	2.7968	2.2682	1.177	1.7524	1.2838	1.6142	1.5572	0.9956	2.2836	1.0595	1.8458	1.3219	1.5863	1.6788	1.6617	1.6449	1.5539	2.0339	1.7219	1.928
72.9	1.2932	1.3496	3.1578	2.3929	0.8059	1.675	1.4758	1.785	1.543	1.0879	2.3025	0.9399	1.8125	1.2958	1.4769	1.5177	1.9766	1.5064	1.4049	1.9725	1.8076	1.772
73	1.4273	1.4508	2.9629	2.417	0.8868	1.7017	1.3761	1.5789	1.4446	1.1241	2.2716	1.1906	1.8354	1.7042	1.7005	1.6883	1.5204	1.6308	1.3455	1.9454	1.8809	2.2959
73.1	1.4601	1.3948	3.1256	2.1172	0.8392	1.8424	1.4092	1.6994	1.4607	1.108	1.8059	1.1302	1.7166	1.4956	1.8041	1.7333	1.6665	1.7762	1.3338	1.863	1.501	2.0044
73.2	1.4043	1.4022	2.6812	2.3255	0.9592	1.6999	1.4906	1.4155	1.4265	1.0762	1.871	1.1119	1.6336	1.1778	1.602	1.5854	1.5725	1.5933	1.3153	2.0617	1.6957	1.9927
73.3	1.4564	1.4607	2.4773	2.3148	1.0172	1.9085	1.4127	1.8783	1.3915	1.0838	2.055	1.2692	1.7559	1.1461	1.2529	1.5804	1.5286	1.5074	1.5666	2.1692	1.4702	1.8553
73.4	1.5744	1.441	2.3846	2.1033	0.8827	1.8108	1.3118	1.8924	1.4149	1.1042	1.963	1.1933	1.8256	1.3746	1.2875	1.624	1.4542	1.3543	1.4034	1.876	1.4878	1.8178
73.5	1.3136	1.3677	2.426	2.3767	0.9216	1.8855	1.3215	1.646	1.4863	0.9935	2.1305	1.2942	1.6167	1.3182	1.3915	1.5077	1.6206	1.5294	1.4876	1.9454	1.5596	1.6299
73.6	1.5592	1.2448	2.5101	2.3966	0.9139	1.9449	1.3365	1.7397	1.3199	0.9598	1.9803	1.3439	1.9699	1.1852	1.3148	1.5714	1.6999	1.4591	1.4069	1.9892	1.7447	1.6452
73.7	1.4335	1.3422	2.2629	2.1873	0.8565	1.744	1.3391	1.8306	1.2944	0.9717	1.9645	1.1929	1.7878	1.064	1.6605	1.4699	1.592	1.326	1.2575	1.9616	1.6669	1.6505
73.8	1.4581	1.5689	2.4839	2.3135	0.9489	1.9911	1.2681	1.8298	1.3075	0.8704	1.8106	1.1906	1.7116	1.1176	1.4431	1.4711	1.6604	1.4233	1.3549	2.0605	1.6696	1.6846
73.9	1.4987	1.3918	2.2337	2.4372	0.7717	1.9359	1.374	1.7912	1.4745	0.9696	1.8678	1.588	1.6852	1.133	1.5339	1.5112	1.7441	1.4202	1.3001	1.8067	1.47	1.6772
74	1.547	1.5931	2.1215	2.6656	0.8493	1.8812	1.2347	1.7932	1.5754	0.9499	1.7953	1.4646	1.928	1.1307	1.346	1.5785	1.538	1.4386	1.4948	1.8112	1.628	1.5904
74.1	1.6177	1.3911	2.3986	2.4491	0.9625	1.732	1.3095	1.5303	1.4422	0.9933	1.9109	1.3302	1.7778	1.273	1.636	1.5719	1.4628	1.6251	1.4479	1.8024	1.7746	1.9901
74.2	1.4021	1.4419	2.405	2.3082	0.8327	1.6698	1.4045	1.873	1.558	1.1056	2.1075	1.2999	1.7891	1.5028	1.5254	1.647	1.7093	1.7138	1.4077	1.8077	1.7818	1.807
74.3	1.4338	1.4292	2.7621	2.4453	0.9903	1.6588	1.4124	1.7094	1.5547	0.943	2.1219	1.4007	2.0254	1.1534	1.6765	1.5373	1.5141	1.6333	1.5006	1.8384	1.6175	1.8029
74.4	1.774	1.656	2.5326	2.569	0.8079	1.7955	1.5031	1.6615	1.5567	0.9842	1.9746	1.2753	1.9254	1.2048	1.4932	1.4792	1.5438	1.6524	1.5822	1.9036	1.7658	1.7359
74.5	1.5815	1.4942	3.0645	2.4621	0.8498	1.6018	1.4356	1.5845	1.66	1.0859	2.0114	1.265	1.7885	1.2129	1.3203	1.2887	1.602	1.4775	1.499	2.0347	1.6765	1.6683
74.6	1.3251	1.3228	2.8522	2.5124	0.7994	1.4911	1.371	1.6385	1.5292	1.0632	2.1773	1.1881	1.8041	1.2287	1.4625	1.5086	1.5471	1.3785	1.4933	1.9378	1.8736	1.82
74.7	1.3461	1.251	3.1213	2.5902	0.7852	1.6245	1.3117	1.4783	1.5495	1.043	2.0992	1.3536	2.0941	1.1175	1.4512	1.5644	1.436	1.336	1.8667	1.8669	1.6289	1.6108
74.8	1.3131	1.4635	3.2533	2.3495	0.7783	1.8355	1.4233	1.5829	1.4397	1.1182	1.9532	1.3542	1.9871	1.158	1.3294	1.4923	1.773	1.347	1.4215	1.7751	1.8575	1.7454
74.9	1.4395	1.3367	2.841	2.5624	0.7737	1.7867	1.339	1.6046	1.5064	0.8578	2.0846	1.1347	2.0115	1.0579	1.4257	1.3955	1.497	1.3952	1.4417	1.8871	1.5533	1.76
75	1.2536	1.4129	2.7208	2.329	0.8408	1.7385	1.3534	1.6665	1.4019	1.0769	2.0715	1.2045	1.805	1.0475	1.3789	1.4421	1.546	1.4881	1.3195	1.8605	1.5976	1.7101
75.1	1.4096	1.5504	2.5687	2.3174	0.8342	1.6623	1.4245	1.5597	1.4639	1.0412	2.0033	1.3404	1.6977	1.1146	1.3162	1.5685	1.6396	1.4432	1.4356	1.7932	1.5714	1.6651
75.2	1.5221	1.4829	2.7746	2.3012	0.8763	1.6893	1.4048	1.6695	1.5271	0.9418	2.1936	1.2432	1.8478	1.2651	1.3665	1.6361	1.393	1.5286	1.6516	1.8384	1.5387	1.6032
75.3	1.4613	1.5584	2.9107	2.4029	0.9269	1.6234	1.5167	1.6282	1.3537	0.9214	1.9508	1.0285	1.8484	1.164	1.3957	1.5188	1.6216	1.679	1.4972	1.7939	1.5895	1.5634
75.4	1.3461	1.6376	2.6169	2.7297	0.8404	1.7223	1.4258	1.6495	1.5543	0.9468	1.9024	1.1165	1.8869	1.24	1.5706	1.5621	1.4984	1.5033	1.4065	1.7344	1.747	1.6725
75.5	1.3391	1.639	2.4312	2.5686	1.0046	1.5478	1.4596	1.6735	1.51	1.1992	1.9017	1.1313	1.9277	1.1247	1.4693	1.6246	1.6833	1.4753	1.793	1.8013	1.8324	1.6069
75.6	1.2937	1.6068	2.7565	2.7479	0.8746	1.6108	1.2497	1.6609	1.4819	0.9714	1.8659	1.1435	1.7867	1.1191	1.3182	1.6667	1.7048	1.5047	1.7137	1.8236	1.5595	1.5845
75.7	1.3586	1.5764	2.7857	2.6976	0.9348	1.7394	1.3864	1.7203	1.531	1.1985	2.0961	1.2281	1.8825	1.0985	1.6005	1.7043	1.5192	1.4087	1.6412	1.7628	1.7562	1.6201
75.8	1.4063	1.4879	2.502	2.4931	0.7768	1.5285	1.2828	1.6431	1.5306	0.8817	2.2238	1.1882	2.0088	1.1445	1.5053	1.4913	1.5208	1.5667	1.4465	1.9997	1.8455	1.4881
75.9	1.4573	1.7185	2.5528	2.5723	0.8414	1.6018	1.2255	1.8541	1.5475	0.9615	1.9318	1.2471	1.7942	0.9193	1.2704	1.3199	1.6492	1.3978	1.5034	2.0378	1.6167	1.6985
76	1.3589	1.7153	2.4043	2.5653	0.7908	1.5623	1.2459	1.8209	1.4703	0.9398	1.8398	1.5067	1.8685	1.1424	1.5189	1.6237	1.6082	1.8032	1.427	1.9932	1.6737	1.681
76.1	1.2987	1.6012	2.376	2.2782	0.7812	1.563	1.377	1.6588	1.3621	1.1071	1.8734	1.2918	1.8693	0.9528	1.5399	1.6589	1.6404	1.5391	1.6882	1.8835	1.5497	1.9256
76.2	1.3815	1.7102	2.32	2.3215	0.9019	1.6971	1.2796	1.6533	1.5109	1.1117	1.7048	1.323	1.9257	1.1771	1.4359	1.768	1.7271	1.4189	1.5272	1.8429	1.5702	1.5225
76.3	1.3543	1.4494	2.3593	2.27	0.9507	1.5608	1.2281	1.5623	1.4889	0.8676	1.85	1.2974	1.904	1.047	1.2983	1.6317	1.531	1.6789	1.6493	1.9243	1.8634	1.4442
76.4	1.5251	1.5967	2.356	2.2296	0.9453	1.6204	1.4188	1.6547	1.4334	0.9274	1.9433	1.3648	1.8327	1.1078	1.3871	1.5468	1.6279	1.4335	1.7199	1.8415	1.7746	1.592
76.5	1.3167	1.5999	2.3058	2.2522	0.8442	1.6046	1.3362	1.4741	1.5557	0.9632	1.8887	1.2681	1.7601	1.2534	1.348	1.8997	1.3795	1.689	1.6194	1.7387	1.6387	1.8192
76.6	1.3875	1.5074	2.3532	2.1382	0.921	1.638	1.4231	1.7412	1.4795	0.8734	2.0749	1.2344	1.8175	1.1097	1.3351	1.573	1.7126	1.3165	1.4337	1.8149	1.7768	1.7033
76.7	1.3872	1.3843	2.5684	2.1574	0.9216	1.6595	1.3474	1.7383	1.4622	0.9832	1.9146	1.1961	1.9268	1.065	1.4942	1.4834	1.5805	1.3495	1.5093	1.9525	1.7734	1.591
76.8	1.3334	1.5254	2.4242	2.3062	1.0084	1.8034	1.2762	1.5401	1.4919	1.0723	1.9988	1.197	1.5194	1.2293	1.4623	1.6591	1.4581	1.4212	1.8518	1.8881	1.5065	1.7644
76.9	1.3648	1.3556	2.2118	2.2448	0.9115	1.579	1.4982	1.7672	1.3638	1.0623	1.7663	1.1845	1.6318	0.9948	1.5357	1.7114	1.6773	1.4396	1.5942	1.9406	1.6893	1.7005
77	1.2523	1.3719	2.4851	2.2385	1.0172	1.6187	1.3252	1.7395	1.3471	1.1829	1.8507	0.9521	1.9259	1.0365	1.4125	1.7685	1.3952	1.2764	1.4419	1.8305	1.7861	1.5704
77.1	1.5519	1.3997	2.9205	2.2328	0.9783	1.7074	1.3546	1.6885	1.513	0.8598	2.008	0.9565	1.8135	1.1897	1.4644	1.6572	1.476	1.4003	1.5196	1.8666	1.6188	1.6896
77.2	1.4705	1.301	2.4112	2.2834	0.929	1.7337	1.3631	1.6509	1.4918	0.9483	1.964	1.0416	1.6788	1.1819	1.3266	1.8429	1.5227	1.2956	1.4154	1.7849	1.6351	1.733
77.3	1.3468	1.5052	2.616	2.4139	0.8298	1.8051	1.3363	1.7019	1.4535	0.8755	2.2178	0.9612	1.7291	1.1863	1.4483	1.7036	1.4735	1.4018	1.3694	1.8732	1.6273	2.0223
77.4	1.4916	1.4673	2.4141	2.3297	0.8859	1.5456	1.3184	1.5038	1.3132	0.9625	2.0419	0.9904	1.5358	1.0992	1.4699	1.5194	1.4154	1.4514	1.5111	1.7983	1.5859	1.9166
77.5	1.5832	1.5569	2.3624	2.3558	0.9539	1.6548	1.1691	1.6119	1.5789	0.8929	2.1306	0.924	1.8125	1.0525	1.5286	1.4044	1.5699	1.4374	1.7056	1.7825	1.7399	1.7129
77.6	1.561	1.4596	2.2105	2.3663	0.833	1.551	1.3538	1.8595	1.524	0.953	1.8472	0.9009	1.6588	1.0518	1.56	1.5315	1.5803	1.4943	1.6556	1.9258	1.4173	1.8665
77.7	1.4202	1.497	2.2358	2.2668	0.8139	1.6697	1.3129	1.6839	1.3952	0.9988	1.8742	0.8765	1.7371	1.4256	1.3204	1.3492	1.6783	1.4651	1.4392	1.8456	1.7115	1.648
77.8	1.4049	1.4343	2.0268	2.5532	0.856	1.6343	1.2862	1.7134	1.4229	0.9667	1.7815	1.0446	1.724	1.1512	1.4033	1.5814	1.6921	1.6414	1.5304	1.9553	1.5684	1.8053
77.9	1.4835	1.4701	2.4627	2.3132	1.0081	1.4888	1.2948	1.7485	1.5779	0.9285	1.8036	0.9409	1.6967	1.032	1.3677	1.5249	1.7365	1.4947	1.5032	1.7975	1.6563	1.7879
78	1.2588	1.3738	2.5105	2.5121	0.9375	1.7134	1.3877	1.7932	1.4557	0.9002	1.8308	0.8945	1.7113	1.0993	1.3694	1.3839	1.8073	1.5986	1.6247	1.8907	1.5907	1.602
78.1	1.5777	1.3708	2.2205	2.3092	0.754	1.6168	1.3222	1.6279	1.3649	1.0592	2.1254	0.9861	1.8451	1.0876	1.3177	1.4681	1.6604	1.5603	1.5431	2.0682	1.6646	1.6948
78.2	1.6784	1.4599	2.4152	2.3444	0.9913	1.5731	1.3677	1.7563	1.4059	1.0835	1.9447	1.0209	1.6274	1.0555	1.5861	1.4123	1.5794	1.5669	1.4075	1.8633	2.0024	1.6314
78.3	1.6632	1.356	2.5028	2.3371	0.8624	1.4495	1.2344	1.6936	1.3905	1.1446	1.955	1.0737	1.6299	1.0685	1.512	1.4336	1.7866	1.6721	1.6025	1.7425	1.5493	1.7441
78.4	1.4572	1.3512	2.6469	2.4032	0.9567	1.8141	1.2956	1.6752	1.4109	0.8962	2.1542	1.1626	1.6356	1.2243	1.5107	1.3516	1.8008	1.4219	1.4881	1.6805	1.6497	1.548
78.5	1.5399	1.4309	2.6373	2.3712	0.9772	1.7258	1.3301	1.6298	1.3955	0.9274	1.8658	1.1202	1.2816	1.1161	1.5319	1.3955	1.622	1.3765	1.4341	1.9399	1.7686	1.6063
78.6	1.5201	1.5104	2.5456	2.241	0.9338	1.6596	1.332	1.597	1.4778	0.8919	1.9235	0.9523	1.4196	1.0501	1.3853	1.4305	1.6038	1.5425	1.3463	1.8829	1.7689	1.6189
78.7	1.7908	1.4443	2.3675	2.4382	0.8289	1.4272	1.1707	1.716	1.4651	0.8859	1.952	1.0569	1.4953	1.1562	1.5581	1.5343	1.5759	1.442	1.7101	1.9284	1.6046	1.8187
78.8	1.5354	1.5952	2.2731	2.2429	0.8014	1.709	1.2541	1.7003	1.3524	0.9187	1.9588	1.025	1.5769	1.2059	1.5194	1.4475	1.7235	1.4705	1.6361	1.914	1.4877	1.669
78.9	1.5436	1.5585	2.2879	2.3892	0.9558	1.5592	1.3615	1.814	1.4267	0.897	2.2101	0.9504	1.7496	1.2048	1.5384	1.441	1.336	1.5098	1.586	1.8681	1.6565	1.4828
79	1.6723	1.6585	2.2968	2.4329	0.8417	1.6209	1.4113	1.7752	1.6246	1.0454	2.3162	0.9759	1.614	1.0738	1.571	1.486	1.5222	1.4811	1.4878	1.7173	1.6516	1.6114
79.1	1.6305	1.7668	2.5164	2.5246	0.8401	1.5724	1.2521	1.7797	1.373	0.9143	2.2058	0.9102	1.7029	1.1237	1.431	1.5205	1.6849	1.5653	1.7436	1.8613	1.6233	1.5219
79.2	1.6312	1.6511	2.3975	2.4444	0.8617	1.6181	1.3523	1.8335	1.4602	1.1686	2.5549	1.0181	1.6184	1.0629	1.6409	1.5389	1.6477	1.5769	1.431	1.8677	1.7166	1.3959
79.3	1.6258	1.5263	2.0901	2.5091	0.7654	1.7768	1.3228	1.7874	1.4193	1.0806	2.3723	1.0294	1.6493	1.2868	1.7053	1.3671	1.5993	1.4359	1.6094	1.9035	1.6353	1.5774
79.4	1.6979	1.6322	2.6188	2.287	0.9159	1.4898	1.1518	1.7276	1.4136	1.1028	2.025	1.117	1.5817	1.2651	1.4889	1.3549	1.6825	1.5396	1.7081	1.8923	1.5765	1.3943
79.5	1.7571	1.7575	2.4878	2.4278	1.0326	1.5849	1.0383	1.7014	1.3805	0.9784	1.8648	0.9057	1.4314	1.4201	1.7422	1.3917	1.6119	1.5896	1.5243	1.8968	1.6409	1.666
79.6	1.801	1.5468	2.5602	2.3161	0.9572	1.7103	1.3215	1.6754	1.6025	1.2948	1.9353	0.9664	1.4689	1.3476	1.6918	1.5731	1.679	1.7525	1.5	1.9077	1.8184	1.6124
79.7	1.6501	1.7075	2.427	2.4368	0.9355	1.7572	1.2471	1.7655	1.5839	1.108	1.8167	0.91	1.5144	1.3005	1.8251	1.8136	1.8008	1.569	1.6684	1.8127	1.7777	1.6801
79.8	1.5694	1.4337	2.4795	2.3596	0.7944	1.744	1.3463	1.7335	1.4628	1.1674	1.9697	1.0017	1.7328	1.2948	1.7646	1.6566	1.672	1.5	1.5129	1.8892	1.8134	1.7829
79.9	1.6159	1.6722	2.3691	2.6038	1.0037	1.7886	1.2511	1.7097	1.6007	0.9844	2.0009	1.0317	1.6071	1.1119	1.5915	1.7468	1.6166	1.4952	1.3929	1.8777	1.6805	1.7002
80	1.4747	1.6399	2.7183	2.5238	0.8844	1.6323	1.2177	1.5214	1.4642	0.9617	1.9205	1.1227	1.7847	1.3774	1.5616	1.7116	1.5826	1.5535	1.5486	2.1323	1.5661	1.7534
80.1	1.4944	1.5519	2.4292	2.6239	0.7894	1.9777	1.2067	1.6596	1.5555	0.9522	1.9201	1.024	1.4147	1.2624	1.6171	1.5633	1.648	1.5857	1.6311	2.2656	1.9408	1.4992
80.2	1.5323	1.3975	1.9741	2.3931	0.9335	1.9908	1.2039	1.6577	1.493	0.8523	1.9278	0.9703	1.2832	1.0926	1.7282	1.7022	1.5799	1.6641	1.4401	1.9561	1.6484	1.7155
80.3	1.5065	1.4904	2.142	2.7151	0.8393	2.0414	1.1467	1.7321	1.5236	0.9549	1.8018	1.1917	1.119	1.1377	1.7808	1.8533	1.6809	1.5292	1.4645	1.9133	1.7869	1.7881
80.4	1.5779	1.3788	2.0294	2.7562	0.8873	2.0423	1.229	1.722	1.593	1.0122	1.9592	1.0625	1.5253	1.3438	1.7246	1.4232	1.6809	1.6723	1.6185	1.9408	1.9078	1.5817
80.5	1.6109	1.445	2.3459	2.7494	0.8715	1.9584	1.1978	1.8155	1.5405	1.0408	1.8025	1.1832	1.5285	1.2165	1.6588	1.5845	1.5029	1.6104	1.6955	1.8422	1.568	1.5885
80.6	1.5025	1.5181	2.1848	2.6479	0.9196	1.7742	1.2954	1.9389	1.5862	1.0519	1.8569	1.1722	1.4299	1.035	1.6593	1.4222	1.6769	1.5356	1.38	1.9085	1.7392	1.7149
80.7	1.7058	1.3824	2.2364	2.6952	0.918	1.8686	1.2945	1.8235	1.5069	0.9264	1.7708	1.0061	1.4043	1.2192	1.651	1.4211	1.5949	1.5492	1.4633	1.9403	1.7697	1.4943
80.8	1.7522	1.5501	2.4119	2.7105	0.8815	1.7164	1.2785	1.7635	1.6608	0.9279	1.8533	1.0843	1.4926	1.1475	1.596	1.4224	1.5669	1.4725	1.2909	1.8963	1.59	1.6373
80.9	1.7393	1.3597	2.2453	2.5921	0.9151	1.6606	1.2052	1.7845	1.4873	1.0657	1.866	0.8985	1.4924	1.1792	1.6427	1.5519	1.6575	1.4995	1.2534	2.0165	1.688	1.6463
81	1.6359	1.4447	2.0364	2.7497	0.8986	1.712	1.172	1.7553	1.6033	1.1469	1.9406	1.1502	1.5986	1.0584	1.6169	1.7426	1.5919	1.5921	1.2152	2.1426	1.7862	1.8302
81.1	1.5829	1.607	2.3533	2.6692	0.9762	1.8306	1.3964	1.7044	1.3861	1.1443	2.0998	0.9922	1.4952	1.106	1.733	1.7604	1.6919	1.5335	1.1548	2.1146	1.8068	1.8686
81.2	1.6708	1.2036	2.171	2.6775	0.9799	1.736	1.1388	1.7992	1.5294	1.4779	1.8033	1.0069	1.4443	1.1061	1.8931	1.7128	1.7816	1.368	1.2144	1.8825	1.5859	1.8859
81.3	1.7825	1.277	2.1127	2.75	0.8432	1.5604	1.0775	1.8937	1.4726	1.2559	2.0207	1.0739	1.565	1.3205	1.8283	1.5523	1.5997	1.5045	1.1471	1.725	1.8048	1.9036
81.4	1.8468	1.2614	2.6275	2.568	1.0398	1.5636	1.1733	1.6458	1.4348	1.2943	2.1925	1.2434	1.6273	1.221	1.679	1.8155	1.562	1.4372	1.4077	1.8752	1.8257	1.9367
81.5	1.9677	1.2843	2.7801	2.5248	0.9654	1.6076	1.2223	1.744	1.4167	1.115	2.0301	1.2839	1.8122	1.0931	1.7621	1.7423	1.5679	1.4578	1.3618	1.8399	1.4954	1.6656
81.6	1.8978	1.4333	2.469	2.4659	1.0059	1.5971	1.1844	1.7775	1.5228	1.0217	1.874	1.1998	1.727	1.1639	1.7125	1.4548	1.5388	1.4116	1.4308	1.7126	2.0473	1.3377
81.7	1.7843	1.3909	2.9141	2.5057	0.9481	1.6427	1.1459	1.781	1.4453	0.9229	2.0126	1.2308	1.8497	1.1105	1.6746	1.4433	1.442	1.5242	1.2249	1.7272	1.7251	1.7237
81.8	1.7733	1.3613	2.6605	2.5577	0.8561	1.4989	1.3172	1.7421	1.5648	1.1526	2.0183	1.2296	1.7176	1.1656	1.9132	1.3956	1.7799	1.6644	1.2717	1.6247	1.9048	1.6588
81.9	1.7539	1.4584	2.9709	2.7186	0.9797	1.5484	1.1934	1.9978	1.503	0.977	1.9841	1.1849	1.7504	1.0577	1.9022	1.348	2.0501	1.6963	1.5606	1.7371	1.749	1.7364
82	1.5176	1.3756	2.8569	2.441	0.7782	1.6847	1.2023	1.8575	1.5486	0.9748	1.814	0.8986	1.4494	1.0455	1.7874	1.3916	2.0642	1.6775	1.4381	1.6444	2.0378	1.6163
82.1	1.5378	1.332	2.6567	2.6091	0.7973	1.9426	1.2815	1.9082	1.5817	1.0974	1.7808	1.0661	1.6393	1.125	1.7785	1.4505	1.9443	1.668	1.5484	1.7214	1.5854	1.8328
82.2	1.7629	1.3436	2.4561	2.6125	1.0479	1.3629	1.2867	1.9479	1.5768	1.3692	1.7813	1.2127	1.5902	1.1973	1.9582	1.3765	1.7144	1.6553	1.4673	1.799	1.7164	1.7361
82.3	1.8006	1.2471	2.446	2.4321	0.9911	1.3812	1.362	1.8019	1.4819	1.3726	1.5777	1.0761	1.7576	1.1731	1.8588	1.3321	1.462	1.5808	1.4681	1.7759	1.7922	1.5561
82.4	1.6252	1.4591	2.3012	2.5079	0.9832	1.4248	1.2066	2.0311	1.442	1.1284	1.7384	1.1206	2.0065	1.2137	1.6874	1.5017	1.6343	1.6415	1.3329	1.7112	2.0134	1.8175
82.5	1.7285	1.302	2.2203	2.4106	0.9185	1.2102	1.3112	1.9192	1.5231	1.0127	1.779	1.0896	1.6013	1.1661	1.7243	1.4245	1.6762	1.5604	1.4882	1.7965	1.8511	1.9182
82.6	1.6637	1.3351	2.4381	2.7251	0.9218	1.3568	1.2169	1.9793	1.2968	1.0086	1.6772	1.1273	1.7591	1.1217	1.5099	1.5952	1.4448	1.7234	1.2856	1.843	1.8739	1.8022
82.7	2.0527	1.564	1.9544	2.5753	0.9674	1.3517	1.2354	1.9242	1.478	1.0821	1.6598	1.2307	1.8425	1.2529	1.5715	1.471	1.5764	1.6016	1.4749	1.9102	1.7569	1.7825
82.8	1.6931	1.4655	2.0544	2.468	1.0629	1.4962	1.1532	1.9556	1.4152	0.8843	1.7108	1.139	1.7091	1.1923	1.5183	1.5284	1.4274	1.6006	1.5234	1.8348	1.9413	2.0272
82.9	1.6613	1.653	2.4054	2.3662	0.9307	1.2288	1.2889	1.9911	1.4717	0.9072	1.7133	1.626	1.7723	1.2226	1.4759	1.4794	1.5963	1.718	1.5773	1.7752	1.6372	1.8172
83	1.6266	1.6566	2.2728	2.5	0.8814	1.5333	1.3319	1.9956	1.4497	1.1508	1.8644	1.1919	1.8805	1.2451	1.5322	1.5063	1.4269	1.7329	1.6722	1.9799	1.7964	1.8786
83.1	1.7508	1.4968	2.2579	2.3406	1.0015	1.4313	1.3351	1.7277	1.646	0.895	1.5779	1.1868	1.7071	1.1489	1.3527	1.3836	1.4887	1.7407	1.5991	1.8111	1.8096	1.6988
83.2	1.7295	1.6558	2.071	2.5128	0.9661	1.4811	1.3138	1.6884	1.6064	1.1712	1.9083	1.3424	1.5855	1.171	1.546	1.4917	1.4189	1.8749	1.6505	1.8341	1.8631	1.7428
83.3	1.7037	1.6589	2.3832	2.4557	1.0056	1.5204	1.4266	1.7591	1.4532	1.0247	1.9869	1.2604	1.666	1.1134	1.7235	1.4831	1.4059	1.6709	1.774	1.8392	1.7179	1.6559
83.4	1.8357	1.8311	2.2744	2.2815	1.0341	1.4892	1.2575	1.8693	1.3722	0.8908	1.7757	1.2726	1.8652	1.1301	1.56	1.4035	1.6429	1.6445	1.7576	1.9504	1.9566	1.9226
83.5	1.7333	1.5369	2.2163	2.542	0.9059	1.2912	1.3367	1.9388	1.6081	1.1725	1.8653	1.2749	1.917	1.2632	1.5289	1.3139	1.4006	1.7282	1.6396	1.7527	1.7926	1.9107
83.6	1.6997	1.4423	2.3201	2.3774	0.9796	1.6558	1.1609	1.9024	1.5593	1.2426	1.8293	1.2588	1.6828	1.2409	1.731	1.4962	1.5763	1.5871	1.8807	1.9049	1.6598	1.8201
83.7	1.7122	1.4312	2.755	2.3254	0.7763	1.4582	1.1876	2.0022	1.5417	1.6519	1.6758	1.1725	1.7601	1.1933	1.5721	1.3505	1.3842	1.7911	1.6493	2.1485	1.8262	2.0711
83.8	1.6432	1.3673	2.3547	2.6884	0.9183	1.3756	1.3884	1.7991	1.433	1.0617	1.7098	1.2802	1.8523	1.2063	1.478	1.3752	1.4997	1.727	1.667	2.0602	1.6046	1.5903
83.9	1.6837	1.3782	2.4067	2.3162	1.0196	1.2941	1.3073	1.7936	1.6272	1.1412	1.7334	1.3468	1.8071	1.2435	1.6405	1.3473	1.5249	1.5645	1.6177	2.1106	1.9218	1.8762
84	1.6961	1.4024	2.4924	2.6742	0.8509	1.4054	1.416	1.6828	1.5122	1.3207	1.638	1.3201	1.6185	1.2643	1.6875	1.3548	1.6534	1.6563	1.725	1.9433	1.6976	1.7148
84.1	1.5032	1.5907	2.4539	2.5624	0.7571	1.5097	1.2482	1.7872	1.5893	1.1462	1.6385	1.2212	1.6997	1.1681	1.6701	1.526	1.6367	1.5669	1.8683	1.7748	1.8978	1.7678
84.2	1.6616	1.3236	2.4985	2.6471	0.8561	1.5604	1.3542	1.6248	1.5939	1.0654	1.7671	1.2014	1.5392	1.1043	1.529	1.3818	1.5338	1.6348	1.5006	2.0881	1.7792	1.708
84.3	1.7629	1.3111	2.2553	2.4095	0.9311	1.3583	1.4317	1.7298	1.5978	0.9413	1.8224	1.2549	1.5268	1.2251	1.6174	1.7381	1.4435	1.7015	1.5911	1.7929	1.839	1.7378
84.4	1.6958	1.4493	2.3478	2.3943	0.9553	1.5721	1.2849	1.8594	1.5405	1.0802	1.6925	1.2204	1.5996	1.1988	1.5857	1.5219	1.5115	1.8332	1.6416	1.8468	1.6301	1.5121
84.5	1.8802	1.341	2.5254	2.6046	1.0309	1.3339	1.1775	1.9947	1.6358	1.2036	1.6426	1.1806	1.5969	1.2382	1.5372	1.712	1.6062	1.549	1.5446	1.9094	1.6613	1.7266
84.6	1.767	1.4958	1.9625	2.528	1.1495	1.5103	1.2895	1.7208	1.6224	1.1514	1.7851	1.4625	1.4544	1.3366	1.5674	1.609	1.7381	1.6542	1.5234	1.9789	1.7736	1.8188
84.7	1.7426	1.4927	1.9238	2.5445	1.0394	1.496	1.3144	1.9807	1.5305	1.0772	1.7512	1.4133	1.4944	1.1814	1.5907	1.4769	1.6972	1.6206	1.6294	1.8171	1.8286	2.0893
84.8	1.6819	1.4655	2.2302	2.4622	0.9045	1.5416	1.3026	1.8001	1.623	1.1137	1.8536	1.2971	1.1312	1.169	1.4995	1.7822	1.5987	1.8023	1.6443	1.7414	1.5741	2.1392
84.9	1.4408	1.5801	2.1897	2.5167	0.9611	1.7408	1.4841	1.787	1.4903	1.3607	1.9159	1.205	1.6572	1.4322	1.6317	1.6167	1.5944	1.669	1.5479	1.8846	1.9688	1.7744
85	1.7277	1.6663	2.0339	2.8547	1.1986	1.6347	1.3384	1.828	1.3872	1.1283	1.8981	1.322	1.3808	1.343	1.6247	1.4625	1.8317	1.6876	1.378	1.7396	1.5455	1.8825
85.1	1.8194	1.3457	2.1386	2.5569	1.0922	1.4972	1.309	1.8181	1.5841	1.0544	1.9052	1.2564	1.2065	1.2224	1.474	1.5415	1.5171	1.5895	1.7353	1.8758	1.7112	2.118
85.2	1.699	1.5263	2.1994	2.6233	0.998	1.5371	1.2641	1.6642	1.5284	1.0238	1.787	1.226	1.3185	1.3595	1.5994	1.4579	1.7138	1.6078	1.859	1.9583	1.6419	1.9626
85.3	1.5959	1.214	2.4833	2.5211	1.131	1.3226	1.3306	1.6677	1.3212	1.0229	1.8258	1.1164	1.2288	1.1546	1.5025	1.3783	1.6129	1.7251	1.7602	1.7927	1.5558	1.8999
85.4	1.6265	1.2109	2.5436	2.5952	1.3614	1.5898	1.1686	1.7602	1.4695	1.187	1.9608	1.3059	1.7258	1.2766	1.5427	1.6417	1.6126	1.6539	1.5364	1.7456	1.7903	2.1178
85.5	1.6048	1.4461	2.5196	2.6852	1.2288	1.7067	1.4027	1.7218	1.5358	1.2469	1.8643	1.3226	1.5645	1.2163	1.5919	1.4756	1.547	1.5266	1.5204	1.9516	1.783	1.5872
85.6	1.7051	1.3838	2.4331	2.4702	1.1528	1.5759	1.1546	1.8566	1.3469	1.1151	1.7939	1.5002	1.4497	1.259	1.5245	1.4366	1.5106	1.8345	1.7892	1.8256	1.6631	1.6424
85.7	2.0908	1.5873	2.3837	2.5215	1.1438	1.5204	1.0963	2.0674	1.4544	1.1799	1.7882	1.4103	1.5298	1.284	1.6008	1.6722	1.614	1.7333	1.5181	1.8849	1.7661	1.6297
85.8	1.883	1.4124	2.4785	2.6384	1.0045	1.4695	1.2127	1.6729	1.5093	1.0075	1.6943	1.3994	1.408	1.1335	1.4775	1.6668	1.661	1.7799	1.4582	1.713	1.5194	1.4081
85.9	1.8384	1.4641	2.2341	2.6789	1.0022	1.4541	1.1181	1.9328	1.5114	1.0595	1.9168	1.1498	1.5922	1.165	1.4824	1.8574	1.5257	1.7547	1.5271	1.8528	1.7687	1.6425
86	1.709	1.4011	2.8657	2.6378	1.0939	1.4912	1.2768	1.8478	1.337	1.0607	2.0509	1.499	1.6344	1.2968	1.6035	1.5781	1.5706	1.6739	1.7227	1.75	1.6763	1.6654
86.1	1.554	1.33	2.7484	2.5691	0.9894	1.598	1.2402	1.6786	1.3548	1.2394	1.8863	1.4829	1.6166	1.1341	1.6074	1.5746	1.6671	1.7427	1.8795	1.8372	1.4948	1.7263
86.2	1.8696	1.4398	2.1753	2.845	1.0219	1.5907	1.2677	2.0374	1.4913	1.3092	2.0015	1.4092	1.4523	1.2404	1.6276	1.6372	1.5103	1.6647	1.5141	1.8597	1.5339	1.9848
86.3	1.8412	1.5527	2.0159	2.602	0.9762	1.7326	1.2124	1.9194	1.4818	0.9479	1.9031	1.4048	1.6234	1.2698	1.6646	1.5737	1.4448	1.5326	1.742	1.8907	1.8403	2.2534
86.4	1.8726	1.3378	2.2957	2.431	1.0986	1.4785	1.4194	1.787	1.5032	1.1202	1.872	1.34	1.7692	1.2415	1.5424	1.6696	1.6425	1.7154	1.6718	1.8968	1.5469	2.0832
86.5	1.6359	1.2826	2.3173	2.696	0.9432	1.3771	1.3407	1.736	1.444	1.3311	1.7265	1.4421	1.515	1.2034	1.6344	1.6501	1.5031	1.6245	1.4582	1.8075	1.7974	2.6633
86.6	1.6985	1.1963	2.459	2.6559	0.9388	1.392	1.488	1.5213	1.4528	1.0139	1.9723	1.1102	1.6585	1.3479	1.5933	1.9094	1.5189	1.6218	1.5783	1.7368	1.8613	2.4942
86.7	1.9273	1.3861	2.7332	2.495	0.9721	1.6753	1.314	1.8314	1.5596	0.9543	1.8611	1.1367	1.6078	1.2297	1.5016	1.835	1.565	1.569	1.7098	1.7063	1.769	1.9836
86.8	1.6901	1.2926	2.7839	2.5159	0.9183	1.7713	1.2235	1.6885	1.5098	0.9809	1.7642	1.3349	1.575	1.2267	1.8257	1.7236	1.4965	1.4299	1.5181	1.7142	1.8307	2.2891
86.9	1.6042	1.439	2.5708	2.5053	0.9243	1.7832	1.086	1.6576	1.651	1.1824	1.9911	1.2649	1.5776	1.2129	1.5823	1.6316	1.5118	1.673	1.473	1.7414	1.9432	2.1936
87	1.7139	1.3746	2.2204	2.6614	1.0361	1.6472	1.0381	1.7536	1.6528	1.0423	1.8993	1.2376	1.5003	1.1813	1.5197	1.6062	1.5959	1.6308	1.4711	1.7682	1.8676	1.8909
87.1	1.5885	1.3263	2.1509	2.6378	1.0131	1.7041	1.1007	1.7116	1.5343	1.0029	1.8261	1.2772	1.658	1.1852	1.6072	1.7123	1.5787	1.6498	1.6455	1.861	2.0384	2.1159
87.2	1.6039	1.244	2.2461	2.6793	0.9035	2.0211	1.0707	1.7253	1.4675	1.0848	1.7643	1.3409	1.8232	1.3233	1.5636	1.4694	1.4505	1.7532	1.4072	1.7117	1.3997	1.9474
87.3	1.7349	1.5539	2.2831	2.6444	1.2469	1.859	1.1164	1.6729	1.5141	0.9864	1.8453	1.2763	1.7688	1.1644	1.6258	1.4755	1.4421	1.558	1.547	1.9797	1.6032	2.2646
87.4	1.7116	1.3693	2.031	2.6102	1.1887	1.7399	1.1576	1.7655	1.4008	1.0019	2.0692	1.6328	1.5501	1.1699	1.5925	1.4054	1.5696	1.6997	1.3801	1.9598	1.4643	2.1808
87.5	1.6331	1.3569	2.0885	2.487	1.04	1.5931	1.3028	1.9604	1.279	1.264	1.9771	1.2314	1.7568	1.1976	1.412	1.5825	1.479	1.5793	1.6214	1.9674	1.7149	2.3943
87.6	1.685	1.2205	2.1518	2.7104	1.0452	1.8858	1.0856	1.8133	1.4243	1.292	1.9348	1.108	1.6093	1.0857	1.778	1.3849	1.469	1.5725	1.5983	2.0251	1.5714	2.289
87.7	1.6902	1.4664	1.998	2.5998	1.0359	1.8619	1.0369	1.8216	1.4294	1.2905	2.0038	1.1571	1.8321	1.2366	1.7382	1.5517	1.4112	1.6793	1.5933	2.1292	1.7289	2.3238
87.8	1.6121	1.281	1.5717	2.5062	0.909	1.7255	1.2711	1.8347	1.4746	1.2545	1.896	1.2398	1.7278	1.2245	1.661	1.5757	1.3774	1.643	1.4513	1.6984	1.8264	2.1706
87.9	1.6363	1.2361	1.6188	2.7202	0.9709	1.76	1.1833	1.6647	1.4752	1.2756	1.8649	1.2118	1.5875	1.1193	1.8076	1.7402	1.481	1.5217	1.8043	1.8731	1.7364	2.4017
88	1.7445	1.2877	1.8665	2.813	0.9197	1.6792	1.1184	1.6649	1.5373	0.9739	2.0947	1.1465	1.8387	1.2598	1.8613	1.75	1.5837	1.4631	1.6606	1.9173	1.9177	2.18
88.1	1.6527	1.2617	2.0531	2.615	1.1094	1.7261	1.2046	1.6751	1.505	1.0576	1.889	1.2377	1.6882	1.0468	1.5675	1.7171	1.4789	1.739	1.6183	1.8034	1.6109	2.1334
88.2	1.7468	1.4077	2.1937	2.6227	0.8868	1.8031	1.2013	1.7163	1.385	1.3237	1.9376	1.436	1.7678	1.2483	1.6812	1.7541	1.8122	1.676	1.4798	1.6985	1.8044	2.104
88.3	1.8089	1.4792	1.8884	2.7155	0.8317	1.7398	0.9647	2.075	1.4	1.1845	1.9025	1.2213	1.6735	1.1641	1.6034	1.5665	1.7205	1.7218	1.5349	1.926	1.7063	2.279
88.4	1.6901	1.2843	2.3509	2.7914	0.9507	1.7891	1.002	2.0042	1.4659	1.0669	1.8965	1.2794	1.6272	1.1521	1.6476	1.9338	1.6309	1.5828	1.5147	1.7772	1.6171	2.0518
88.5	1.6911	1.2625	2.3726	2.8635	0.7921	1.9707	1.1261	1.826	1.4193	1.0157	1.8145	1.1431	1.7777	1.2796	1.9302	1.6938	1.7232	1.6696	1.6722	1.7385	1.9034	2.1675
88.6	1.9127	1.2975	2.034	2.6741	0.6998	1.892	1.2442	1.738	1.3908	0.9635	1.947	1.3103	1.4749	1.2247	1.9083	1.7532	1.673	1.8293	1.6407	1.8639	1.7746	2.4476
88.7	1.7331	1.2832	2.1045	2.6626	0.831	1.9176	1.2663	1.7304	1.3754	1.0686	1.8246	1.1334	1.4765	0.9487	1.5763	1.6022	1.6735	1.7352	1.526	1.8173	1.7263	2.3093
88.8	1.5287	1.3831	2.1566	2.7496	0.7907	1.9302	1.2547	1.8747	1.6087	1.2742	1.9414	1.0906	1.6124	0.9937	1.8561	1.525	1.4502	1.6332	1.6089	1.7429	1.6523	1.887
88.9	1.7065	1.0979	2.6397	2.7678	0.7969	1.7329	1.0506	1.619	1.3537	0.9807	1.8594	1.3333	1.479	0.9974	1.5719	1.719	1.7357	1.8523	1.7843	1.7914	1.5375	1.8198
89	1.7436	1.2914	2.5264	2.6412	0.7676	1.8097	1.2328	1.8361	1.4214	1.0612	2.0332	1.2231	1.7617	1.1081	1.7124	1.635	1.5217	1.905	1.611	1.8236	1.8039	1.9018
89.1	1.6588	1.1481	2.6384	2.6076	1.0914	1.414	1.3117	1.8327	1.4087	0.9518	1.9443	1.3343	1.7146	1.0635	1.7437	1.6394	1.7278	1.5944	1.6118	1.8316	1.6926	1.6479
89.2	2.0747	1.2472	2.5296	2.6574	0.9752	1.6758	1.0336	1.7774	1.4813	0.9415	1.8582	1.0824	1.4511	1.1091	1.6328	1.745	1.6185	1.6637	1.7635	1.7109	1.5931	2.1021
89.3	1.6936	1.1372	2.664	2.6992	0.8839	1.6466	1.2032	1.763	1.4547	0.878	1.7591	1.225	1.4992	1.1453	1.6323	1.5894	1.8401	1.7301	1.6696	1.6997	1.4966	2.1225
89.4	1.8319	1.2997	2.7017	2.5447	0.7935	1.527	1.2494	1.8461	1.2865	1.0993	1.7821	1.078	1.5964	1.1098	1.5562	1.47	1.7846	1.681	1.67	1.8122	1.6008	1.9374
89.5	1.8458	1.0519	2.7267	2.7589	0.8367	1.8594	1.503	1.953	1.4514	1.1473	2.2046	1.1456	1.5854	1.0329	1.5396	1.5549	1.8051	1.6577	1.5359	1.9086	1.812	2.0901
89.6	1.8151	1.3173	3.0019	2.7092	0.9629	1.5213	1.4731	1.6815	1.4272	0.9338	2.0464	1.2627	1.4138	1.107	1.5368	1.5607	1.681	1.6607	1.5391	1.8074	1.8973	2.2429
89.7	1.7397	1.4186	2.4877	2.6631	1.0038	1.6073	1.5184	1.7526	1.4121	0.9868	1.9662	1.1753	1.5357	1.1949	1.7654	1.5409	1.7629	1.7577	1.4513	1.7755	1.7021	2.0418
89.8	1.5143	1.1528	2.3938	2.5902	0.8439	1.6155	1.4822	1.7254	1.5403	0.8973	1.8445	1.1846	1.6925	1.0669	1.7355	1.4568	1.5273	1.7969	1.3224	1.723	1.9093	2.077
89.9	1.5276	1.2065	2.5805	2.5576	0.9247	1.7425	1.4447	1.6528	1.4039	0.8611	1.9282	1.1528	1.5137	1.2183	1.7021	1.6515	1.5887	1.8701	1.5	1.7111	1.8433	2.0359
90	1.8882	1.3597	2.5359	2.7733	0.9133	1.5735	1.3762	1.7832	1.4544	0.9026	1.9201	1.1078	1.4489	1.219	1.7577	1.8771	1.8103	2.1246	1.4841	1.6707	1.7952	1.9309
90.1	1.8063	1.3155	2.4288	2.9106	0.9336	1.6905	1.2404	1.7287	1.3293	0.834	1.811	1.1559	1.4182	1.144	1.6419	1.721	1.7453	1.6283	1.4959	1.6444	1.8285	2.1236
90.2	1.6813	1.4051	2.7495	2.7674	0.8989	1.7686	1.1598	1.9618	1.3586	1.0638	1.7522	1.1167	1.439	0.96	1.7561	1.7309	1.6112	1.7372	1.558	1.7512	1.7195	1.7873
90.3	1.7708	1.41	2.4566	2.5258	0.8813	1.6964	1.1912	1.8574	1.3442	0.9022	1.8387	1.2118	1.3624	1.3314	1.8153	1.597	1.5521	1.6946	1.5322	1.7521	1.641	1.9935
90.4	1.5311	1.3529	2.4519	2.6147	0.926	1.7273	1.2582	1.801	1.3742	1.0296	1.7306	1.1582	1.224	1.1273	1.7504	1.5107	1.8101	1.6882	1.3739	1.6475	1.8104	2.0032
90.5	1.7972	1.2526	2.6159	2.518	0.9819	1.5726	1.2459	1.9159	1.3659	0.9468	1.8362	1.2259	1.4814	1.1931	1.9576	1.5728	1.5719	1.6917	1.4873	1.7357	1.5519	1.8788
90.6	1.6414	1.3225	1.9529	2.3703	0.8624	1.6883	1.2434	1.9461	1.3036	0.974	1.826	1.2852	1.6646	1.0978	1.8747	1.4663	1.4911	1.6624	2.0084	1.681	1.6808	1.7684
90.7	1.8335	1.2967	2.112	2.6125	0.8956	1.4336	1.1243	1.8728	1.3271	0.9557	1.8641	1.1148	1.7265	1.1435	1.8195	1.6712	1.5309	1.6043	1.7631	1.7128	1.4702	2.0034
90.8	1.8469	1.2856	2.6158	2.5842	0.9921	1.6645	1.0542	1.6336	1.44	0.9255	1.8393	1.1879	1.6566	1.0857	1.44	1.5615	1.4539	1.7579	1.7424	1.5911	1.8498	2.0298
90.9	1.9952	1.5362	2.8011	2.4476	0.8847	1.5646	1.0464	1.8451	1.2525	0.9185	1.9246	1.164	1.5667	1.0429	1.7016	1.6289	1.3806	1.7046	1.4605	1.874	1.6042	1.9283
91	1.8905	1.2825	2.5736	2.4055	1.1032	1.4506	1.1056	1.7437	1.3994	0.8891	1.9555	1.2627	1.4539	1.0419	1.8361	1.6598	1.4863	1.7256	1.5404	1.7248	1.5715	1.9569
91.1	1.7854	1.2698	2.8331	2.5639	0.9811	1.8559	1.1494	1.8899	1.3038	1.2024	1.7009	1.2181	1.3738	1.1637	1.7138	1.6509	1.721	1.6365	1.5147	1.7711	1.5851	1.9277
91.2	1.8297	1.3696	2.6324	2.3516	1.173	1.6159	1.0056	1.7634	1.3308	0.9965	1.8341	1.3173	1.4711	1.1734	1.8175	1.6667	1.3697	1.7269	1.7097	1.7617	1.5603	1.9777
91.3	1.8293	1.2099	2.6181	2.4377	1.0073	1.5639	0.9158	2.0459	1.5192	1.3399	1.7925	1.1159	1.7645	1.0367	1.6804	1.7035	1.4983	1.5729	1.5747	1.8877	1.5541	1.8067
91.4	1.8286	1.3056	2.683	2.3846	0.8904	1.6692	1.0036	1.7931	1.422	0.9077	1.8381	1.1708	1.856	0.9722	1.5473	1.6817	1.6638	1.745	1.6463	1.7631	1.6769	1.9403
91.5	1.8925	1.3073	2.4463	2.4902	0.93	1.7645	1.0384	1.8135	1.5745	1.0894	1.7306	1.4926	1.7248	1.1189	1.6191	1.672	1.4766	1.5537	1.4464	1.8818	1.7292	1.8873
91.6	1.6364	1.4608	2.3649	2.7311	0.884	1.7405	1.1731	1.9487	1.4225	1.0734	1.9118	1.4442	1.8169	0.9993	1.6506	1.5758	1.4006	1.683	1.5751	1.9135	1.3278	2.1736
91.7	1.9331	1.4595	1.8335	2.6171	1.0058	1.6304	1.3479	1.8026	1.4437	1.0151	1.9599	1.3294	1.7264	1.2236	1.7722	1.7373	1.6231	1.7252	1.6472	2.0167	1.5165	1.9213
91.8	1.7408	1.3906	1.756	2.3426	1.0018	1.9447	1.5268	1.7985	1.3728	1.0674	2.0535	1.4994	1.7445	1.1115	2.1276	1.7342	1.4505	1.6999	1.6922	1.8265	1.6004	1.8248
91.9	1.5478	1.3465	1.8795	2.6388	1.0997	1.9513	1.2361	1.9359	1.4085	0.9619	1.9165	1.2909	1.8314	0.9777	1.7855	1.6431	1.5558	1.6008	1.5012	1.8427	1.5103	1.7465
92	1.7349	1.3556	2.237	2.439	1.1013	1.8621	1.1355	1.8014	1.3895	1.1968	1.9579	1.471	1.418	1.0011	1.7198	1.7369	1.3805	1.6846	1.2849	1.8743	1.6598	1.9925
92.1	1.7876	1.226	2.2984	2.6097	1.4344	1.9106	1.2214	1.9626	1.4462	1.1405	1.8272	1.3276	1.6719	1.1492	1.6994	1.6707	1.4352	1.6536	1.4144	1.809	1.5325	1.8965
92.2	1.8542	1.5201	1.9549	2.5682	1.1553	1.6969	1.6642	1.8404	1.3467	1.1033	1.8173	1.3014	1.9961	0.9852	1.5881	1.9457	1.3789	1.6758	1.5809	1.7965	1.4668	1.9884
92.3	1.7643	1.2887	2.444	2.5285	1.1124	1.7402	1.3336	1.9349	1.3991	1.0374	1.9864	1.1014	1.5887	1.1018	1.597	1.6603	1.3942	1.6072	1.3371	1.8235	1.56	1.8618
92.4	1.9589	1.1984	2.0268	2.5551	1.0006	1.8313	1.1502	1.6977	1.3533	0.9927	1.9863	1.1773	1.5543	1.3393	1.7666	1.5664	1.5214	1.7247	1.6523	1.7572	1.3766	1.7797
92.5	1.6769	1.2796	1.945	2.7451	1.186	1.8531	1.2551	1.8919	1.3467	1.1126	1.7299	1.097	1.4313	1.1687	1.7898	1.5493	1.4949	1.6438	1.6888	1.902	1.7141	1.7576
92.6	1.7621	1.4319	1.9021	2.4614	1.0795	2.0396	1.3239	1.8578	1.5207	1.0433	1.9199	1.1866	1.3008	1.2375	1.6271	1.4525	1.2951	1.6484	1.57	1.7534	1.6051	1.9184
92.7	1.8491	1.3207	2.2157	2.3453	1.0972	2.0088	1.1857	1.8514	1.349	0.9939	1.7864	1.2126	1.5287	1.3658	1.8009	1.5187	1.387	1.5998	1.5773	1.8806	1.7192	2.0298
92.8	1.7301	1.2899	1.8641	2.5419	1.2205	1.7792	1.416	1.8207	1.3708	0.9892	1.7569	1.1939	1.5059	1.2074	1.7996	1.606	1.4371	1.6427	1.7338	1.9695	1.4221	2.012
92.9	1.9223	1.3901	1.9904	2.6614	1.0718	1.6505	1.2333	1.9353	1.4155	1.002	1.813	1.4045	1.2673	1.3102	1.5839	1.716	1.4754	1.6127	1.7645	1.8293	1.389	2.0787
93	1.9441	1.5935	1.7977	2.3972	1.0469	1.8373	1.0685	1.8218	1.4442	0.9922	1.8127	1.2218	1.4351	1.571	1.7668	1.8261	1.6257	1.7778	1.556	1.8432	1.4402	1.7903
93.1	1.6953	1.1005	1.7931	2.6002	1.1725	1.8731	1.2044	1.7573	1.3095	1.1874	2.0772	1.0793	1.7319	1.3849	1.9762	1.6506	1.5129	1.6889	1.8172	1.9061	1.6415	2.1053
93.2	1.9493	1.0902	1.8032	2.4413	1.4528	2.0666	1.1499	1.8125	1.5554	1.036	1.8506	1.2473	1.6525	1.427	1.8484	1.5008	1.5913	1.7215	1.4502	1.9686	1.4019	1.8046
93.3	1.7249	1.1637	1.8447	2.4381	1.0834	1.9447	1.2521	1.5983	1.3102	0.9898	1.9343	1.2911	1.3781	1.3932	1.7368	1.4468	1.6995	1.9115	1.6498	1.8545	1.2837	2.0018
93.4	1.9128	1.1179	1.6505	2.4309	1.0896	2.0407	1.2064	1.7913	1.418	1.0498	2.1532	1.125	1.6514	1.6047	1.6662	1.4514	1.5148	1.8559	1.583	1.779	1.3841	2.0629
93.5	1.9621	1.5694	1.7589	2.3311	1.3314	1.7609	1.0926	1.778	1.3803	1.0102	2.0039	1.2384	1.6025	1.3475	1.8938	1.443	1.5702	1.7906	1.5973	1.7777	1.4709	2.0148
93.6	1.9215	1.2846	1.7755	2.7496	1.2481	2.1349	1.4617	1.739	1.4484	0.954	1.8533	1.1158	1.5286	1.3031	1.8484	1.5469	1.5709	1.7083	1.484	1.8649	1.317	1.6371
93.7	2.0202	1.3545	1.8394	2.5284	1.1498	1.5574	1.3966	1.7456	1.459	1.0682	1.8491	1.0295	1.5896	1.3708	1.763	1.5833	1.4674	1.7507	1.6452	1.9029	1.249	2.052
93.8	1.9527	1.6035	2.0827	2.526	1.0979	1.998	1.137	1.8164	1.4804	0.9716	1.839	1.0833	1.5336	1.2591	1.6202	1.7093	1.4741	1.763	1.7132	2.0241	1.4263	1.8965
93.9	1.6513	1.347	1.7915	2.6775	1.0356	1.6042	1.1569	1.8399	1.4659	1.3413	1.925	1.1184	1.5327	1.3958	1.7956	1.7287	1.4058	1.6963	1.6338	1.9135	1.3123	1.9684
94	1.9964	1.6459	2.1297	2.6462	1.24	1.7224	1.1187	1.7925	1.3934	1.049	1.9038	1.0572	1.6377	1.281	1.8183	1.5362	1.4504	1.7655	1.9801	1.8716	1.3567	1.8145
94.1	2.0311	1.8177	1.8189	2.5123	1.1235	1.5652	1.1858	1.6401	1.416	0.8624	1.8444	1.079	1.5857	1.0757	1.7673	1.7687	1.5901	1.5881	1.9237	1.8902	1.3558	2.1632
94.2	1.9347	1.742	1.8319	2.6675	1.0733	1.606	1.137	1.6467	1.5252	1.04	1.8216	1.1051	1.6052	1.3379	1.697	1.4773	1.6792	1.665	2.0456	1.9472	1.3993	2.1175
94.3	2.0364	1.5269	1.8584	2.3637	1.1479	1.4733	1.173	1.6609	1.4486	0.9551	1.7336	1.1069	1.5059	1.28	1.6532	1.5779	1.7265	1.5794	1.8704	1.9173	1.2201	2.0701
94.4	1.8068	1.5907	1.8276	2.4293	1.1011	1.4737	1.1732	1.594	1.4364	1.0061	1.7761	1.046	1.6482	1.446	1.88	1.5378	1.599	1.7261	2.0402	1.8749	1.5639	2.2145
94.5	1.6279	1.5937	1.7028	2.3861	1.073	1.7355	1.1047	1.5859	1.3555	1.1528	2.0049	1.3558	1.5168	1.4227	1.7574	1.4785	1.6897	1.6976	1.9877	1.8786	1.4494	2.0644
94.6	1.768	1.3195	1.4859	2.4142	1.0733	1.572	1.3072	1.563	1.4124	1.4401	1.8714	1.1164	1.4331	1.2413	1.8327	1.4233	1.6718	1.771	2.1452	1.8059	1.3504	2.1841
94.7	2.0991	1.3461	1.6875	2.5273	1.3229	1.6337	1.1368	1.6974	1.5828	1.1664	1.7546	1.2687	1.7087	1.1272	1.6166	1.4841	1.7272	1.8789	1.7314	1.9541	1.2952	2
94.8	1.8409	1.3543	1.3886	2.5457	1.2476	1.8203	1.0854	1.637	1.4745	1.1344	1.7793	1.0972	1.7248	1.1906	1.8369	1.5178	1.8304	1.7822	1.867	1.6698	1.2972	1.7981
94.9	1.9242	1.4581	1.5102	2.4205	1.3096	1.6639	1.1512	1.6811	1.5221	1.347	1.7817	1.3121	1.7598	1.1407	1.715	1.4454	1.947	1.5362	1.8652	1.9552	1.4668	2.0861
95	1.6001	1.5073	1.4773	2.7475	1.1312	1.8034	1.2557	1.7289	1.5821	1.2414	2.1828	1.1586	1.5918	1.2899	1.6002	1.3604	1.64	1.7119	1.9806	1.8623	1.3476	1.8675
95.1	1.7915	1.4298	1.4024	2.6095	1.2185	1.8451	1.0836	1.8924	1.383	1.3619	1.9016	1.1563	1.602	1.1563	1.5538	1.5169	1.6996	1.8813	1.8756	1.9349	1.2617	1.988
95.2	1.7613	1.5156	1.4239	2.8001	0.946	1.6773	1.1737	1.8047	1.3979	1.3335	1.9844	1.0722	1.2672	1.1718	1.7226	1.6311	1.7994	1.6689	1.7072	1.8781	1.6918	1.8667
95.3	1.9527	1.5327	1.48	2.6489	1.0186	1.69	1.0762	1.9566	1.4999	1.2575	2.1499	1.1884	1.3981	1.2888	1.557	1.4747	1.4347	1.7381	1.713	1.8396	1.3779	1.8472
95.4	1.8255	1.6237	1.5399	2.5717	1.0111	2.0408	1.24	2.0528	1.4244	1.2067	1.7862	1.1194	1.3316	1.2831	1.5056	1.6746	1.5384	1.6035	1.6636	1.9792	1.7913	1.7125
95.5	1.69	1.7574	1.561	2.8596	1.0142	2.0463	1.4228	1.9713	1.5341	1.0438	1.8804	1.1294	1.5323	1.3651	1.7817	1.5369	1.5871	1.7807	1.9384	1.7613	1.6531	1.877
95.6	1.9682	1.4347	1.4699	2.6688	1.0574	1.8742	1.3365	1.8511	1.4917	1.1053	1.9132	1.1493	1.458	1.3424	1.5233	1.4539	1.9407	1.6713	1.8334	1.9051	1.7556	1.9292
95.7	2.1826	1.5824	1.6275	2.6416	1.0465	1.7756	1.4083	1.9581	1.4716	1.0982	1.8713	1.1627	1.3454	1.4354	1.7642	1.4889	2.1703	1.5777	1.875	1.898	1.5787	1.9219
95.8	2.1876	1.5904	1.7384	2.5285	1.0976	1.907	1.2509	1.9488	1.533	0.9068	1.8516	1.1628	1.5131	1.325	1.5493	1.4447	2.3403	1.6161	1.5384	2.0101	1.2598	1.7409
95.9	2.0267	1.4005	1.5549	2.7715	1.1244	1.9375	1.3227	2.0615	1.5897	1.0099	1.7227	1.5586	1.6063	1.239	1.5237	1.4794	2.0689	1.7108	1.6346	1.749	1.3609	1.8059
96	2.1031	1.4858	1.5871	2.625	1.0968	1.884	1.2439	1.8821	1.366	1.1026	1.8177	1.4807	1.7257	1.0922	1.4057	1.4959	2.138	1.7292	1.7858	1.7354	1.4031	2.0233
96.1	1.9775	1.5236	1.6157	2.5592	1.1739	1.7678	1.3157	2.0386	1.4811	1.0077	1.7566	1.6386	1.6918	1.1452	1.4421	1.405	2.3467	1.5411	1.3813	1.9117	1.1701	2.0705
96.2	1.7654	1.5596	1.7198	2.532	1.1157	1.8472	1.2439	1.7888	1.5532	1.0961	1.7632	1.2858	1.4803	1.0079	1.5253	1.4503	2.548	1.7599	1.7835	1.9813	1.284	1.9458
96.3	2.0511	1.6985	1.721	2.4759	1.0271	1.6614	1.3323	1.8404	1.3414	1.0223	1.7697	1.2271	1.5252	1.2232	1.4891	1.5432	2.5167	1.5925	1.5099	1.7061	1.6173	1.9613
96.4	1.8865	1.6748	1.4671	2.4999	1.3632	1.7955	1.2866	1.915	1.6562	0.8103	2.0119	1.2752	1.5019	1.2004	1.6389	1.4755	2.2041	1.5983	1.7451	1.7949	1.34	1.7609
96.5	1.7202	1.5479	1.4952	2.5378	1.1077	2.0495	1.3303	1.9471	1.2737	0.9133	1.7067	1.1368	1.4568	1.3053	1.7093	1.467	2.5265	1.5786	1.3219	1.8402	1.4908	1.7514
96.6	2.0446	2.0479	1.6264	2.5553	1.0691	1.9858	1.3444	2.0659	1.3711	0.8653	1.8119	1.2455	1.4802	1.2249	1.5176	1.5103	2.7217	1.6671	1.6227	1.8336	1.2111	1.9257
96.7	2.1873	1.4028	1.6658	2.4437	1.1051	1.8798	1.1839	2.0206	1.2644	1.094	1.8856	1.1686	1.4575	1.1537	1.3289	1.5447	2.4751	1.6954	1.5827	1.9608	1.1759	1.6834
96.8	1.6814	1.523	1.5348	2.3744	1.1428	1.8808	1.2161	2.0268	1.437	1.0798	1.9602	1.1908	1.4916	1.1551	1.2826	1.6774	2.4817	1.4773	1.4588	1.8125	1.2621	1.8519
96.9	1.8533	1.6406	1.5408	2.4329	1.24	1.7812	1.2031	2.191	1.3811	0.9607	1.8239	1.2177	1.5329	1.5902	1.8471	1.4706	2.2819	1.7136	1.6376	1.7911	1.3255	2.1258
97	1.8034	1.5222	1.792	2.2703	1.3218	2.0119	1.0815	2.0136	1.4935	0.998	1.832	1.3413	1.562	1.2651	1.4082	1.4209	2.4631	1.5682	1.6522	1.8323	1.4059	2.2413
97.1	2.1234	1.6273	1.6514	2.4196	1.0704	1.7882	1.1292	1.8738	1.1879	1.2029	1.778	1.324	1.3517	1.1244	1.5262	1.5338	2.4488	1.5576	1.2333	1.8098	1.4952	2.1992
97.2	2.1803	1.4559	1.5485	2.4286	1.0726	1.6595	1.1111	2.1277	1.2606	1.0821	1.6496	1.4589	1.3315	1.4113	1.4943	1.5556	2.6223	1.5868	1.4353	1.9469	1.2777	2.0216
97.3	1.935	1.5734	1.7273	2.3417	0.8835	1.5276	1.2096	2.2376	1.13	1.0745	1.8915	1.4453	1.6926	1.0974	1.7037	1.5568	2.9061	1.5495	1.3659	2.0816	1.4152	2.1399
97.4	1.7442	1.6621	1.5859	2.4304	1.0221	1.6774	1.2259	1.9482	1.5172	0.9891	1.8527	1.526	1.5479	1.1821	1.3462	1.5433	2.5791	1.5319	1.6082	1.9104	1.5646	2.1723
97.5	1.6598	1.5755	1.6603	2.5429	0.991	1.8642	1.1094	1.9248	1.4305	1.1672	1.8875	1.4794	1.5379	1.3057	1.3355	1.5551	2.5517	1.6012	1.603	1.718	1.6253	2.3892
97.6	1.8293	1.632	1.531	2.4785	1.1029	1.6284	1.0116	1.9857	1.3689	0.9197	1.9198	1.3392	1.6453	1.1271	1.5881	1.4985	2.7247	1.5577	1.589	1.824	1.3622	2.3245
97.7	1.8471	1.4203	1.5453	2.5456	0.9073	1.5987	0.9554	1.9964	1.205	1.1344	1.8966	1.2614	1.6974	1.1241	1.5491	1.5347	2.5288	1.6048	1.5214	1.864	1.4878	2.1878
97.8	1.8431	1.5125	1.487	2.0386	0.9661	1.6027	1.0646	1.8696	1.359	1.1134	1.9623	1.5023	1.428	1.1767	1.4428	1.4417	2.6918	1.601	1.9031	1.7677	1.7154	2.304
97.9	1.911	1.4829	1.5701	2.3372	0.8793	1.5886	1.0744	1.8905	1.3281	1.3261	1.9277	1.5039	1.5479	1.3398	1.5069	1.4923	2.6592	1.62	1.6056	1.8474	1.4149	2.3229
98	1.6006	1.3033	1.5367	2.5282	0.8717	1.762	1.0117	2.0201	1.3271	1.2295	1.9632	1.2963	1.7239	1.2855	1.3798	1.6711	2.3173	1.5056	1.5583	1.7515	1.4722	2.4415
98.1	1.6068	1.5023	1.4543	2.5241	0.9493	1.3531	1.1967	1.9095	1.1427	1.2758	2.0229	1.5106	1.9552	1.2698	1.6937	1.5803	2.4047	1.5347	1.5387	1.7198	1.346	2.1755
98.2	1.7334	1.6173	1.6851	2.5174	0.8123	2.0318	1.46	1.9801	1.4027	1.3855	1.8303	1.4667	2.0887	1.1322	1.4982	1.6664	1.9691	1.5558	1.5731	1.8928	1.3687	2.0495
98.3	1.7859	1.6877	1.7989	2.2597	1.0087	1.6532	1.2351	1.9459	1.4066	1.1068	1.9405	1.5364	1.9044	1.3747	1.597	1.7472	2.7232	1.5121	1.3565	1.7297	1.7857	1.9353
98.4	1.8163	1.4198	1.8057	2.4711	0.9944	1.7676	1.1598	1.9202	1.3674	1.1023	2.0215	1.4629	2.0485	1.2516	1.5334	1.7612	2.7502	1.5001	1.622	1.6795	1.4172	2.0509
98.5	1.9331	1.515	1.4305	2.3839	0.8477	1.7094	1.2801	2.1221	1.4957	1.1342	1.9415	1.3778	2.178	1.5199	1.3517	1.645	2.6868	1.5659	1.5764	1.5837	1.5969	1.9497
98.6	1.7582	1.6646	1.6527	2.3634	1.2013	1.5657	1.2689	1.999	1.4114	1.3007	2.1757	1.3056	2.2836	1.2936	1.4692	2.0035	2.7488	1.6239	1.4484	1.7146	1.4522	2.0138
98.7	1.6299	1.9283	1.5043	2.5939	0.9956	1.9232	1.201	1.887	1.4434	1.2812	2.0241	1.1006	1.9796	1.3007	1.4774	2.1151	2.5963	1.6161	1.4851	1.8595	1.4231	1.9915
98.8	1.7062	1.7304	1.6403	2.6807	0.9731	1.7384	1.3364	1.8725	1.4046	1.0876	2.0468	1.2354	2.2695	1.7162	1.601	2.3223	2.6336	1.6514	1.2827	1.8851	1.579	2.0717
98.9	1.761	1.8177	1.7034	2.4252	1.0012	1.6813	1.1706	1.9718	1.3136	1.0725	2.021	1.0395	2.28	1.3892	1.3473	2.0559	2.6293	1.7472	1.5204	1.6475	1.4815	1.8853
99	1.7286	1.6402	1.5112	2.5085	0.9237	1.6014	1.0977	1.9134	1.3643	1.2829	1.9557	1.4224	2.0912	1.5317	1.4833	1.9562	2.6555	1.6764	1.5094	1.8197	1.5442	1.8486
99.1	1.7961	1.8594	1.7096	2.4311	0.9925	1.7052	1.0528	2.0978	1.5222	1.1564	1.8965	1.4336	2.1748	1.345	1.4239	1.9267	2.5145	1.5771	1.3954	1.8668	1.5398	1.692
99.2	2.1977	1.9287	1.9173	2.4831	0.9891	1.7297	1.4885	1.8701	1.3314	1.1017	1.7258	1.1728	2.2208	1.2161	1.3766	1.9797	2.6259	1.6865	1.5851	1.8238	1.6521	1.9605
99.3	1.5533	1.567	1.6699	2.6026	0.9159	1.5375	1.3936	1.9572	1.7652	1.051	1.9615	1.3052	2.2749	1.518	1.4671	1.8114	2.6302	1.6944	1.7712	1.9571	1.2015	1.8674
99.4	1.7313	1.748	1.8171	2.7041	1.0295	1.5951	1.3767	1.8291	1.782	0.9414	2.0191	1.1183	2.3588	1.4442	1.383	1.6777	2.7144	1.6872	1.617	1.8776	1.3776	1.8821
99.5	1.6627	1.6973	1.5611	2.4341	1.0676	1.6288	1.3856	1.7963	1.6738	1.0658	2.0824	1.273	2.1316	1.2141	1.6766	1.7761	2.3446	1.6615	1.7279	1.6806	1.2409	2.0231
99.6	1.8293	1.6883	1.8376	2.4715	0.927	1.4998	1.1945	2.1081	1.8585	0.9938	1.9802	1.0773	2.0896	1.1521	1.8384	1.8267	2.3583	1.5713	1.6183	1.9339	1.3333	1.7447
[truncated: 2,008 more rows]

## Sheet: RMSFs
	REPLICA 1; RMSF VALUES ARE GIVEN IN ANGSTROM
residue index	0G0	C5P	0FT	U2S	UM3	C2P	PUA	139	UA3	ATR	A3P	PAP	U1S	PAX	ADP	U3P	0EY	U2P	TXS	AMP	C3P	UMF
1	4.6046	4.3322	3.9527	5.0605	2.3723	2.3819	2.9601	2.3697	2.2904	2.629	3.0987	2.9833	4.2073	2.386	2.7825	2.5434	7.0255	3.0616	5.3663	3.5891	7.1456	2.5593
2	2.9696	2.7937	2.5257	3.6312	1.0256	1.2536	2.1409	0.9732	1.2785	1.6771	1.9228	1.9731	2.6678	1.2401	1.942	1.305	4.7245	1.6333	3.835	2.2133	4.7094	1.3456
3	2.1827	1.9977	1.7123	2.7954	0.8113	1.0996	1.5095	0.7992	1.1963	1.2996	2.1916	1.7686	2.014	1.046	1.9552	1.127	3.4009	1.4394	3.2344	2.2673	3.6828	1.0348
4	1.5321	1.5011	1.2018	2.1821	0.6678	0.9291	1.4265	0.7106	1.0728	1.3623	1.8896	1.5968	1.5921	0.897	1.731	0.9155	2.5368	0.9385	2.501	2.0099	3.004	0.8515
5	1.7001	1.1068	0.9128	1.1137	0.6097	0.9051	1.6412	0.6427	0.8916	1.2284	1.7493	1.2603	1.1541	0.8428	1.4513	0.795	1.6529	0.7961	1.6543	1.6891	1.2877	0.7462
6	1.0397	1.0093	1.0295	1.2115	0.598	0.8625	1.0532	0.6147	0.8128	1.0007	1.4724	1.2545	1.1491	0.7615	1.2351	0.7989	1.4283	0.9099	1.649	1.4388	1.324	0.76
7	1.0291	1.0449	1.0673	1.3308	0.5242	0.6394	1.1318	0.5362	0.7185	0.8527	0.9049	1.1448	1.118	0.601	1.0235	0.6602	1.5939	0.867	1.4414	1.0849	1.489	0.6904
8	0.7726	0.7388	0.6491	0.8051	0.4872	0.5309	0.9091	0.4761	0.588	0.68	0.7128	0.7308	0.824	0.5115	0.688	0.5146	0.8485	0.5802	0.8678	0.7188	0.7838	0.5229
9	0.673	0.6546	0.8396	0.6891	0.5026	0.5693	0.7762	0.5029	0.5782	0.6386	0.6838	0.7008	0.6961	0.5639	0.6235	0.5656	0.8445	0.6942	0.8031	0.7212	0.8192	0.5441
10	0.7245	0.7839	1.0624	0.9817	0.4929	0.5458	0.7502	0.4881	0.6362	0.76	0.6601	0.8515	0.7845	0.5478	0.6104	0.5548	1.1964	0.9719	0.9953	0.6554	1.1196	0.5406
11	0.5727	0.6391	0.7712	0.6957	0.4796	0.4743	0.6519	0.4582	0.7442	0.588	0.5723	0.8377	0.744	0.5047	0.6859	0.513	0.7087	0.9178	0.9525	0.5956	0.6006	0.4673
12	0.4766	0.51	0.573	0.573	0.5832	0.5473	0.5864	0.4667	0.8318	0.5315	0.5614	0.7395	0.6477	0.487	0.5626	0.4619	0.5771	0.7939	0.6691	0.5178	0.5481	0.4906
13	0.5112	0.5191	0.6278	0.6236	0.5351	0.5541	0.651	0.5273	0.8277	0.5745	0.5308	0.6663	0.6779	0.5298	0.5529	0.4835	0.6612	0.76	0.6808	0.6101	0.6194	0.5429
14	0.5648	0.5503	0.7278	0.8071	0.5294	0.4454	0.602	0.457	0.7868	0.4809	0.5844	0.6679	0.6813	0.5097	0.5114	0.4423	0.6936	0.6204	0.6608	0.6797	0.7744	0.4759
15	1.1967	1.4536	1.5213	2.0869	0.8045	0.5201	1.1634	1.2122	1.39	0.6091	1.4525	1.1693	1.33	0.6842	1.3905	0.4884	0.885	0.6154	1.3629	1.2966	1.702	0.6199
16	1.3024	1.5897	1.2049	2.0904	1.0626	0.7793	1.0616	1.5213	1.8326	0.8651	1.6861	1.968	1.2792	0.838	1.3997	0.7138	1.3408	1.0849	1.5122	1.5244	1.5026	0.8065
17	1.2409	1.9324	1.0028	2.4497	0.8021	0.738	0.8105	1.1046	1.6659	0.7022	1.5773	1.6203	0.9033	1.3177	1.2541	0.6701	2.7164	0.9884	2.1188	2.1524	0.9508	0.86
18	1.1782	2.4118	1.231	2.6309	1.317	1.3876	1.638	1.3027	1.5387	1.2158	1.6948	2.7678	1.2845	1.8383	1.1262	0.8998	2.2447	1.8225	3.3704	2.8639	1.5437	1.104
19	1.1927	2.6216	1.2973	3.3174	1.6986	1.5547	1.8662	1.4734	1.4714	1.4012	1.8829	2.7491	1.2701	2.278	1.1955	0.8374	2.9205	2.5767	3.4708	3.0305	1.6343	1.1502
20	1.1586	0.898	1.0219	2.7625	1.9575	0.9271	1.1248	1.0688	1.1941	0.9258	1.8108	1.5652	0.9528	1.3294	1.124	1.0148	2.6991	1.8079	2.7941	2.6356	1.2229	1.1279
21	1.9666	1.914	1.9577	2.8122	1.828	1.6138	1.6107	2.1455	2.2596	1.4989	1.4382	1.8586	2.0275	1.7706	0.8674	1.181	1.7987	1.739	2.2303	1.9193	2.2097	2.3643
22	1.3476	1.1681	1.3644	2.4902	1.8891	1.3712	1.0753	1.5432	1.6111	1.5065	1.1785	1.4648	1.2214	1.4178	1.0119	1.6132	1.1921	1.2006	1.8574	1.2359	1.6128	1.466
23	1.4351	1.0038	1.5435	2.2476	1.6347	1.2898	1.1306	1.7051	1.6619	1.5343	1.1821	1.6707	1.4134	1.4395	1.1487	1.8737	1.2696	1.192	1.7401	1.3048	1.7118	1.5598
24	0.9901	0.7658	1.0963	1.1032	0.7767	0.902	0.9084	1.0246	1.1306	0.9971	1.0293	1.3112	0.977	0.9335	0.9605	0.9961	0.9967	0.9898	1.2344	1.0225	1.0285	0.9087
25	0.6157	0.5149	0.6894	0.7977	0.6065	0.6599	0.6039	0.5908	0.8206	0.7146	0.6237	0.8888	0.7053	0.6586	0.5919	0.7114	0.6353	0.5603	0.7203	0.6534	0.6855	0.5454
26	0.5087	0.457	0.5561	0.5916	0.525	0.6184	0.4895	0.5143	0.7309	0.6577	0.4652	0.6969	0.5705	0.6046	0.566	0.615	0.5167	0.5642	0.5101	0.508	0.5941	0.526
27	0.6629	0.5965	0.7181	0.7691	0.6982	0.8279	0.6588	0.6625	1.0715	0.9624	0.6077	1.0392	0.6703	0.7543	0.8055	0.8849	0.7068	0.8518	0.7428	0.6827	0.676	0.7204
28	0.7169	0.5833	0.6963	0.8961	0.6599	0.6279	0.6706	0.653	0.9442	0.7756	0.6525	0.9178	0.7468	0.7182	0.7004	0.7747	0.7088	0.6375	0.8677	0.6715	0.7294	0.6615
29	0.6009	0.5184	0.5435	0.7543	0.5143	0.5016	0.5687	0.5052	0.7102	0.6316	0.5354	0.6625	0.6274	0.609	0.5365	0.6042	0.6045	0.5372	0.7684	0.5587	0.5946	0.54
30	0.5803	0.5085	0.5068	0.7197	0.5671	0.5994	0.5405	0.4664	0.804	0.8038	0.5009	0.8392	0.5449	0.5531	0.5367	0.744	0.5678	0.568	0.7686	0.537	0.5695	0.5068
31	0.7719	0.6598	0.6438	0.9308	0.6728	0.6611	0.6809	0.5706	0.9401	0.9457	0.5986	0.9135	0.6925	0.7006	0.6648	0.9101	0.7463	0.647	0.9562	0.6574	0.7365	0.5938
32	0.8127	0.798	0.8147	1.0995	0.6773	0.6276	0.7739	0.6444	0.9817	0.9028	0.685	0.8285	0.869	0.796	0.7077	0.8334	0.8789	0.7041	1.192	0.7155	0.8168	0.7043
33	0.7377	0.7626	0.7876	1.0265	0.5887	0.5865	0.7046	0.561	0.8132	0.7774	0.6422	0.8386	0.9136	0.6799	0.7104	0.6527	0.8573	0.6482	1.2841	0.6596	0.835	0.6003
34	0.9887	0.8191	0.9506	1.1184	0.7	0.687	0.8485	0.6491	0.9213	0.8389	0.7118	0.9169	0.9131	0.7193	0.853	0.7591	0.9165	0.8648	1.389	0.802	0.9749	0.6295
35	1.1808	0.7182	0.9831	0.9163	0.6211	0.7732	0.8222	0.624	0.8256	0.8612	0.6125	1.0229	1.0687	0.6736	0.8611	0.9559	0.8698	0.8017	1.2901	0.7739	1.019	0.5668
36	1.9578	0.8848	1.0999	0.9768	0.7687	0.9005	1.0527	0.7449	0.9985	1.013	0.7126	1.4069	1.2927	0.8729	0.9784	1.7911	0.9115	0.9668	1.2876	0.9305	1.393	0.6731
37	1.665	1.1126	1.3265	1.4676	1.3029	1.0066	1.3409	0.9511	1.3703	1.2949	0.9465	1.3643	1.4142	1.2425	1.2605	1.916	1.1329	1.1705	1.6005	1.1751	1.5405	0.7719
38	1.4603	1.3654	1.4358	1.8727	1.5147	1.7201	1.3849	1.2364	1.8764	1.8384	1.1388	1.7819	1.8071	1.4546	1.2965	2.3031	1.3216	1.428	1.8024	1.3573	1.4457	1.5964
39	1.1417	1.0447	1.1017	1.5928	1.16	1.2015	1.1282	1.1486	1.559	1.3954	0.994	1.1702	1.5318	1.0257	1.0321	1.79	1.0555	1.1781	1.512	1.1211	1.1461	1.406
40	0.8042	0.8063	0.8785	1.1622	0.7758	0.8057	0.9023	0.9188	1.1576	1.0302	0.8631	0.8266	1.2237	0.8604	0.8184	1.2651	0.8213	0.9772	1.1947	0.899	0.8377	0.9489
41	0.8165	0.9172	0.9063	1.1242	0.6972	0.719	0.8777	0.9522	1.2467	0.953	0.9425	0.9104	1.2127	0.8567	0.9183	1.0642	0.7984	1.0434	1.2186	0.9306	0.9343	1.0592
42	0.8098	0.8722	0.9733	1.0663	0.7927	0.8247	0.939	0.9135	1.321	0.8691	0.9567	0.8296	1.2375	0.7691	0.9296	0.8602	0.846	1.0432	1.2282	0.9329	0.8829	0.9623
43	0.6513	0.6861	0.7775	0.8749	0.6842	0.708	0.7833	0.7225	1.1162	0.717	0.6979	0.6979	0.9489	0.6824	0.7544	0.7233	0.6736	0.8318	0.9791	0.7416	0.7195	0.6926
44	0.5369	0.5374	0.6221	0.6779	0.5643	0.5543	0.6151	0.5149	0.912	0.5511	0.5268	0.5749	0.6797	0.5169	0.6036	0.5594	0.5327	0.6222	0.7567	0.5564	0.5375	0.505
45	0.4894	0.5074	0.6239	0.6287	0.5799	0.5159	0.5903	0.4916	0.7583	0.5204	0.5322	0.5735	0.7125	0.4643	0.5752	0.4969	0.5036	0.6036	0.6279	0.5148	0.4973	0.483
46	0.4606	0.4713	0.6135	0.5823	0.5547	0.4891	0.5626	0.4624	0.8386	0.5021	0.5838	0.5834	0.6021	0.465	0.5393	0.4667	0.5622	0.605	0.6027	0.5247	0.5283	0.4335
47	0.4604	0.4557	0.5536	0.5316	0.5358	0.4946	0.5204	0.4684	0.7143	0.4721	0.5585	0.6226	0.586	0.4373	0.5203	0.4249	0.5395	0.623	0.5836	0.5048	0.5159	0.4585
48	0.4607	0.5268	0.6073	0.6174	0.5474	0.4807	0.5485	0.4894	0.7202	0.4976	0.5911	0.653	0.6348	0.4842	0.5563	0.4297	0.6338	0.6034	0.6168	0.5719	0.5621	0.5052
49	0.6923	0.6761	0.6193	0.734	0.5504	0.5057	0.6885	0.5522	0.675	0.5852	0.6726	0.7441	0.6655	0.5621	0.5679	0.5092	0.606	0.587	0.6113	0.6551	0.6275	0.497
50	0.924	0.8163	0.6521	0.8883	0.5693	0.5553	0.8481	0.5783	0.6958	0.6367	0.8121	0.8914	0.7581	0.6748	0.6493	0.5873	0.7151	0.6792	0.7178	0.8042	0.6858	0.539
51	0.8738	0.747	0.6215	0.8149	0.5456	0.5729	0.7412	0.5784	0.664	0.6363	0.7901	0.8466	0.7012	0.6337	0.6613	0.5809	0.7111	0.6486	0.7075	0.782	0.6864	0.5677
52	0.8656	0.7816	0.703	0.8647	0.5928	0.6197	0.7825	0.5832	0.6876	0.6579	0.81	0.8717	0.7263	0.6788	0.7112	0.6002	0.7626	0.6841	0.7453	0.8036	0.7259	0.6012
53	0.7406	0.6916	0.6364	0.7595	0.518	0.535	0.7105	0.5079	0.5729	0.5602	0.6667	0.7235	0.6494	0.5937	0.5965	0.5113	0.6596	0.5855	0.6453	0.6561	0.6344	0.534
54	0.5906	0.592	0.5568	0.6217	0.4463	0.4588	0.5574	0.4711	0.4976	0.4936	0.5638	0.6394	0.5409	0.4692	0.5165	0.4444	0.5529	0.4776	0.5771	0.5539	0.5775	0.4567
55	0.6281	0.6789	0.6457	0.6573	0.4933	0.5501	0.5617	0.5308	0.5739	0.5613	0.648	0.6992	0.6025	0.5039	0.6188	0.4962	0.639	0.5435	0.6665	0.6407	0.6482	0.5365
56	0.6396	0.6902	0.7205	0.7481	0.5238	0.5791	0.6335	0.5502	0.5938	0.604	0.6281	0.6668	0.7248	0.5254	0.6323	0.5336	0.6985	0.6451	0.7125	0.617	0.6451	0.5954
57	0.4966	0.5399	0.5672	0.5837	0.4492	0.4762	0.539	0.4663	0.5196	0.4765	0.5164	0.5328	0.5802	0.4471	0.4982	0.4603	0.5519	0.526	0.57	0.5003	0.5336	0.489
58	0.517	0.58	0.6279	0.5991	0.4856	0.5178	0.5431	0.4951	0.5906	0.5108	0.5651	0.5604	0.6928	0.4697	0.5475	0.5184	0.5589	0.5982	0.6036	0.5571	0.5609	0.538
59	0.7112	0.8256	0.8465	0.8261	0.7343	0.7182	0.8294	0.7472	0.7764	0.7175	0.8063	0.7148	0.9285	0.6813	0.7189	0.7301	0.7663	0.8681	0.815	0.7514	0.7277	0.7357
60	0.6666	0.7391	0.7251	0.6967	0.6581	0.6312	0.7256	0.6801	0.7255	0.6686	0.7262	0.7183	0.8104	0.6219	0.6433	0.6524	0.6819	0.6773	0.7843	0.6997	0.6542	0.6646
61	0.7678	0.8599	0.784	0.9131	0.7831	0.6701	0.8773	0.7579	0.9286	0.7721	0.814	0.8769	1.0361	0.727	0.7426	0.7452	0.8446	0.8887	0.9292	0.8408	0.743	0.7441
62	0.6852	0.7583	0.7635	0.7895	0.7082	0.6638	0.7821	0.724	0.836	0.7072	0.8097	0.7922	0.9643	0.6588	0.7253	0.7283	0.729	0.77	0.8793	0.7502	0.6634	0.7199
63	0.7149	0.7698	0.7916	0.8176	0.6832	0.6598	0.7905	0.753	0.8648	0.719	0.8001	0.7703	1.0008	0.6557	0.7798	0.7655	0.7109	0.7811	0.9276	0.7264	0.6631	0.7481
64	0.8696	0.9713	0.9538	0.9183	0.8131	0.823	0.8855	0.8789	0.9857	0.8708	0.9713	0.947	1.1467	0.8106	0.9342	0.9019	0.832	0.9217	1.1254	0.8971	0.8271	0.8918
65	0.8338	0.9583	0.8651	0.8281	0.822	0.8158	0.7948	0.8347	0.9321	0.799	0.9766	0.9061	1.043	0.799	0.8864	0.8626	0.7691	0.8929	1.1093	0.87	0.8286	0.8943
66	1.1413	1.3927	1.1656	1.0676	1.1656	1.1505	1.0133	1.1278	1.2083	1.0919	1.3377	1.2469	1.3113	1.0485	1.1875	1.144	1.0445	1.1787	1.4585	1.1501	1.1482	1.2159
67	1.368	1.6394	1.3963	1.332	1.4314	1.3575	1.2942	1.3193	1.4164	1.3035	1.6151	1.5214	1.5406	1.2648	1.4187	1.3605	1.2875	1.4567	1.7312	1.3266	1.405	1.4762
68	1.3375	1.5753	1.4056	1.3365	1.4289	1.3204	1.3736	1.3124	1.3968	1.3127	1.6036	1.5021	1.568	1.3163	1.4205	1.3661	1.2547	1.4364	1.6643	1.3566	1.3696	1.4309
69	1.1756	1.3715	1.2656	1.2014	1.1232	1.1283	1.1653	1.0895	1.2238	1.1475	1.4177	1.3476	1.4128	1.1355	1.2338	1.193	1.1357	1.24	1.49	1.1506	1.1907	1.2661
70	0.9478	1.065	1.0654	1.0044	0.8895	0.9271	1.0173	0.9081	1.0247	0.9547	1.1608	1.1572	1.2674	0.9391	1.0257	1.0102	0.9381	1.0398	1.2081	0.9924	0.9588	1.0041
71	0.7641	0.9402	0.9329	0.8258	0.7217	0.7984	0.7433	0.7986	0.9547	0.855	0.977	1.0112	0.9665	0.9063	0.8526	0.8736	0.8654	0.9468	0.9256	0.8634	0.8094	0.8064
72	0.5249	0.5592	0.6131	0.6004	0.4942	0.4847	0.5739	0.5282	0.6761	0.5282	0.6112	0.5786	0.7178	0.5134	0.5856	0.5993	0.5257	0.6198	0.6886	0.5497	0.5239	0.5903
73	0.4696	0.4741	0.5364	0.5531	0.4554	0.4234	0.5348	0.4793	0.6072	0.4605	0.5348	0.489	0.6027	0.4218	0.5038	0.5143	0.4723	0.5427	0.5916	0.4673	0.4662	0.5284
74	0.5266	0.5114	0.5449	0.6007	0.5345	0.4811	0.5785	0.5175	0.6279	0.506	0.5692	0.5411	0.5822	0.4796	0.5514	0.5278	0.5236	0.5822	0.6488	0.5025	0.5017	0.5316
75	0.4891	0.5362	0.5232	0.5829	0.4953	0.4978	0.5507	0.5071	0.5627	0.4822	0.5452	0.5379	0.4958	0.4818	0.5139	0.4744	0.5646	0.502	0.6014	0.4969	0.5292	0.4744
76	0.6918	0.7635	0.7164	0.8474	0.7112	0.6898	0.7548	0.6835	0.8028	0.6979	0.746	0.7546	0.7109	0.6848	0.6523	0.6754	0.8028	0.7361	0.879	0.7306	0.7065	0.639
77	0.7295	0.8163	0.8198	0.944	0.7954	0.7993	0.8425	0.7731	0.8842	0.7774	0.8687	0.8164	0.8521	0.8611	0.7845	0.7803	0.8306	0.831	0.9799	0.837	0.7902	0.7658
78	0.5352	0.586	0.5837	0.692	0.6043	0.5707	0.6006	0.5495	0.6284	0.5757	0.635	0.6407	0.5849	0.6146	0.5995	0.5349	0.61	0.6035	0.7067	0.6317	0.5897	0.5339
79	0.4485	0.4443	0.4557	0.5458	0.4691	0.4576	0.4692	0.4263	0.5041	0.4806	0.5221	0.5494	0.4697	0.5189	0.5219	0.4112	0.5071	0.4802	0.5663	0.5102	0.4991	0.4895
80	0.5074	0.4675	0.5638	0.5986	0.5182	0.507	0.5357	0.5205	0.5794	0.5044	0.5141	0.5936	0.5439	0.4983	0.5793	0.4504	0.551	0.5094	0.654	0.533	0.5795	0.5437
81	0.5295	0.4869	0.6068	0.5635	0.57	0.5184	0.5671	0.5976	0.6851	0.5169	0.4919	0.6455	0.6024	0.4525	0.567	0.4432	0.5802	0.5738	0.6324	0.5203	0.5738	0.5825
82	0.4675	0.4536	0.5748	0.6031	0.55	0.4614	0.5891	0.4509	0.5943	0.5263	0.5869	0.6334	0.7447	0.4727	0.5144	0.5636	0.5298	0.5265	0.5434	0.5759	0.4923	0.4411
83	0.5118	0.6046	0.6303	0.6771	0.6559	0.6643	0.6652	0.5262	0.6568	0.6682	0.605	0.6696	0.7211	0.6009	0.6717	0.6134	0.5589	0.7354	0.6201	0.6603	0.5819	0.5034
84	0.5263	0.5474	0.6104	0.5741	0.61	0.615	0.5982	0.5449	0.6964	0.5537	0.5302	0.566	0.558	0.6148	0.6362	0.5434	0.528	0.6982	0.6423	0.578	0.6085	0.507
85	0.6875	0.7342	0.8193	0.807	0.7558	0.8121	0.7767	0.6919	1.0224	0.7443	0.7899	0.7883	0.7837	0.6468	0.7397	0.7347	0.6708	0.7982	0.9337	0.7791	0.7159	0.6962
86	0.736	0.6636	0.8693	0.9877	0.8389	0.908	0.8633	0.7448	1.1965	0.8579	0.8262	0.8393	0.9291	0.712	0.7392	0.8222	0.7354	0.8375	0.9818	0.7634	0.7559	0.8032
87	0.9037	0.8026	0.9832	1.1112	2.1277	1.6125	1.092	0.8607	1.4465	1.1873	0.9601	1.1355	1.0516	0.9323	0.8984	1.169	0.885	0.9396	1.128	0.8825	0.892	0.8479
88	2.1484	1.1788	1.4895	1.6509	2.1163	1.4354	1.9767	1.2773	2.0523	1.7992	1.458	1.649	1.6128	1.8742	1.2656	1.8137	1.4065	1.2658	1.6054	1.3059	1.5847	1.5949
89	1.7768	1.211	1.5901	1.4785	1.6951	1.6965	2.2145	1.3293	1.6198	2.0355	1.4825	1.7019	1.6734	1.9205	1.3228	1.7675	1.7364	1.2925	1.4886	1.3196	1.3961	2.09
90	1.7975	0.8065	1.088	1.5943	1.055	0.9777	2.322	0.9343	1.7983	1.9317	1.0094	1.0525	1.2927	1.676	0.917	1.4577	1.1408	0.9448	1.0789	0.9047	0.9451	1.7649
91	1.652	1.0019	1.3377	1.4802	1.2338	1.0828	1.7907	1.1618	1.5497	1.3709	1.1846	1.1535	1.5382	1.6779	1.1299	1.5399	1.1762	1.1417	1.3456	1.1372	1.162	1.5708
92	1.6363	1.0145	1.3018	1.5523	1.2971	1.3376	1.4533	1.1744	1.6715	1.3959	1.0638	1.3023	1.528	1.2127	1.0748	1.9017	1.0317	1.1143	1.3788	1.0912	1.1783	1.2686
93	1.8828	1.1349	1.3637	1.6955	1.4676	1.6034	1.6187	1.2294	1.8981	1.5651	1.092	1.544	1.5825	1.2413	1.1322	2.1554	1.0896	1.1771	1.4065	1.1265	1.2165	1.3418
94	1.6355	1.0817	1.3844	1.495	1.3699	1.4829	1.5495	1.2026	1.6356	1.4939	1.1082	1.4531	1.5495	1.4246	1.1099	1.9517	1.1137	1.1602	1.2393	1.146	1.1162	1.2931
95	0.8813	0.7153	0.8452	1.096	0.9657	0.9887	0.8997	0.8144	1.188	1.1176	0.8063	1.0598	1.1	0.9884	0.7417	1.4346	0.7405	0.8259	0.9142	0.7841	0.7676	0.9239
96	0.7281	0.6487	0.797	0.9934	1.0534	1.0784	0.7725	0.7145	1.1973	1.0927	0.7694	1.0887	0.942	0.7391	0.6886	1.2646	0.704	0.7638	0.7531	0.7102	0.7343	0.7622
97	0.5856	0.5356	0.6857	0.7478	0.696	0.7942	0.6583	0.6006	0.9303	0.7161	0.6478	1.0025	0.7132	0.6035	0.6346	0.7105	0.6053	0.6441	0.6677	0.591	0.6432	0.6139
98	0.6948	0.6628	0.803	0.9996	0.9801	1.1074	0.8351	0.6859	1.1651	1.0471	0.6871	1.227	0.726	0.7233	0.802	1.0776	0.7063	0.7098	0.8422	0.745	0.7238	0.6291
99	0.5489	0.5654	0.5798	0.9183	0.8978	0.7223	0.8629	0.5265	0.8404	1.0648	0.5711	0.7429	0.5779	0.6428	0.5392	0.9324	0.6304	0.5646	0.6764	0.5989	0.5525	0.4942
100	0.5961	0.6739	0.7022	1.1791	0.8083	0.6638	0.7323	0.5919	0.908	0.928	0.6856	0.7725	0.9054	0.6397	0.6636	0.8928	0.7074	0.6703	0.742	0.7332	0.5952	0.558
101	0.7245	0.6821	0.7312	0.908	0.7211	0.7066	0.6639	0.6966	0.7703	0.7009	0.6959	0.8011	0.8237	0.6042	0.7746	0.5859	0.7518	0.6872	0.7984	0.6442	0.7482	0.6661
102	0.6838	0.6202	0.6599	0.769	0.6796	0.6073	0.6489	0.6509	0.7414	0.6312	0.6367	0.7767	0.6641	0.5623	0.7711	0.5426	0.6631	0.6406	0.7686	0.6255	0.7391	0.6054
103	0.5584	0.5539	0.5848	0.6465	0.6	0.5489	0.5989	0.5264	0.6027	0.5552	0.6079	0.6739	0.5505	0.5253	0.7087	0.4847	0.5902	0.5921	0.6835	0.5736	0.6366	0.5332
104	0.5602	0.579	0.5591	0.6222	0.6267	0.5513	0.6057	0.5354	0.5854	0.5688	0.6032	0.646	0.5463	0.5414	0.7105	0.5021	0.6026	0.5907	0.648	0.5954	0.6113	0.5169
105	0.5097	0.553	0.5263	0.5837	0.5777	0.5312	0.5437	0.5054	0.5643	0.5422	0.567	0.629	0.5237	0.5576	0.5623	0.4999	0.5377	0.5678	0.6477	0.5459	0.5603	0.4853
106	0.5125	0.4885	0.4982	0.5045	0.5457	0.4988	0.5209	0.4831	0.5872	0.4975	0.5411	0.5827	0.5501	0.494	0.546	0.4923	0.5103	0.5843	0.5793	0.501	0.5042	0.49
107	0.4555	0.4389	0.4767	0.4987	0.4839	0.4241	0.4952	0.4558	0.5911	0.4444	0.5189	0.4869	0.5255	0.4307	0.5084	0.4922	0.452	0.5483	0.5785	0.4476	0.4425	0.4815
108	0.4411	0.4749	0.47	0.5279	0.47	0.4404	0.4893	0.4499	0.5839	0.4523	0.5117	0.4681	0.5249	0.4391	0.5063	0.502	0.4838	0.5596	0.554	0.4429	0.4772	0.5026
109	0.5221	0.598	0.6394	0.5913	0.4888	0.5024	0.5388	0.4826	0.6218	0.5552	0.5983	0.5647	0.6552	0.4976	0.5913	0.5891	0.5393	0.6167	0.624	0.5505	0.5748	0.581
110	0.5637	0.6679	0.7514	0.5804	0.4885	0.5451	0.5407	0.4888	0.6218	0.5859	0.6363	0.6172	0.6703	0.5033	0.6443	0.5674	0.5795	0.6304	0.6316	0.598	0.6227	0.5587
111	0.7447	1.0022	0.9796	0.871	0.6089	0.714	0.7424	0.5617	0.7391	0.7352	0.8819	0.9377	0.9587	0.6251	0.8018	0.6846	0.7832	0.7763	0.7749	0.781	0.8066	0.6308
112	1.0409	2.2247	1.3115	1.3644	0.9776	1.1303	1.1319	0.9314	1.1403	1.0995	1.3442	1.3368	1.3554	1.0172	1.1287	1.0614	1.2403	1.1466	1.1482	1.1656	1.1195	0.9252
113	1.473	1.8429	1.7537	1.8925	1.5707	1.6348	1.7221	1.4907	1.701	1.6685	2.0236	1.8707	1.8308	1.6182	1.7174	1.5984	1.7804	1.5236	1.7725	1.7577	1.6878	1.3742
114	1.5551	1.3702	1.7639	1.7767	1.6632	1.6389	1.7324	1.6166	1.6768	1.7241	2.1066	1.7478	1.7435	1.6246	1.8688	1.6355	1.775	1.4126	1.9092	1.7334	1.7253	1.4722
115	0.9514	1.0079	1.0897	1.0261	0.9177	1.0318	1.031	0.8786	0.9858	0.9755	1.214	0.9666	1.0713	0.923	1.0802	0.8993	1.0912	0.9874	1.0344	0.9742	1.0734	0.8738
116	0.7564	0.8582	0.8496	0.8151	0.5708	0.7154	0.7032	0.5713	0.6964	0.6894	0.8702	0.9262	0.8393	0.6261	0.751	0.6029	0.7838	0.6998	0.8186	0.7713	0.8108	0.5997
117	0.5154	0.6745	0.6586	0.5678	0.4543	0.5197	0.4932	0.4621	0.5616	0.4941	0.5735	0.6079	0.603	0.4535	0.5854	0.4845	0.5502	0.5176	0.6298	0.5519	0.5837	0.4756
118	0.5536	0.8468	0.6643	0.7356	0.5237	0.5463	0.59	0.4714	0.5916	0.5487	0.6817	0.7338	0.6595	0.4938	0.6386	0.5548	0.6129	0.545	0.6258	0.6308	0.6537	0.4882
119	0.5406	0.6561	0.5633	0.6439	0.6249	0.595	0.6119	0.5311	0.6599	0.605	0.6922	0.6268	0.6797	0.5821	0.6087	0.6478	0.6539	0.6495	0.6229	0.6146	0.6162	0.5783
120	0.5432	0.5997	0.5058	0.6051	0.6331	0.5725	0.5733	0.5482	0.6647	0.5839	0.6583	0.5847	0.6444	0.5951	0.5953	0.6003	0.5912	0.6638	0.6201	0.5695	0.5615	0.5585
121	0.6539	0.6166	0.6064	0.644	0.6065	0.5757	0.6259	0.6445	0.7359	0.6198	0.7192	0.622	0.7655	0.6376	0.6494	0.6641	0.6125	0.6987	1.6642	0.6085	0.6081	0.6841
122	0.7699	0.7094	0.6746	0.7041	0.6969	0.6081	0.707	0.6914	0.8203	0.6683	0.7707	0.7241	0.8387	0.6602	0.7317	0.671	0.6507	0.7734	0.8722	0.6636	0.6506	0.6607
123	0.8299	0.7569	0.7421	0.7337	0.8232	0.6925	0.7511	0.7743	0.8445	0.7563	0.7974	0.8428	0.8596	0.724	0.8081	0.679	0.7056	0.8585	0.8607	0.76	0.7253	0.6832
124	1.226	1.1247	1.12	1.1589	1.1667	0.9911	1.0937	1.1248	1.1606	1.1009	1.0232	1.2382	1.3295	1.0435	1.2321	0.9908	1.1468	1.4665	1.1386	1.1173	1.0051	0.9653
	REPLICA 2; RMSF VALUES ARE GIVEN IN ANGSTROM
residue index	0G0	C5P	0FT	U2S	UM3	C2P	PUA	139	UA3	ATR	A3P	PAP	U1S	PAX	ADP	U3P	0EY	U2P	TXS	AMP	C3P	UMF
1	2.6127	3.0461	5.433	7.0784	2.4104	2.7882	2.6748	2.3817	2.2518	2.3625	2.3391	2.2934	2.7773	2.3701	4.2297	2.9281	4.0657	2.4045	2.7856	2.8333	2.5861	4.0428
2	1.7596	1.9654	3.7525	4.7835	1.0349	1.7834	1.4119	1.2201	1.0106	1.2623	1.2665	1.2774	1.8813	1.3099	2.5694	1.6774	2.5046	1.0801	1.752	1.777	1.25	2.944
3	1.6618	1.1813	2.6894	2.5334	0.8075	1.8118	1.0949	1.012	0.8484	1.125	1.193	1.2798	1.8279	0.797	2.7793	1.4404	2.2784	0.8976	1.699	1.8825	1.2173	2.8224
4	1.4944	1.0559	1.9761	1.5988	0.6965	1.7184	1.0041	0.9565	0.7199	0.9906	1.0377	1.2022	1.5702	0.6073	2.112	1.3574	1.9802	0.779	1.5063	1.6898	1.0863	2.3293
5	1.3052	0.9449	1.2141	1.221	0.6669	1.4976	0.8972	0.8995	0.6456	0.8835	0.9499	1.1067	1.3626	0.5808	1.8782	1.1655	1.4745	0.6812	1.3306	1.517	1.0502	1.7027
6	1.1225	0.8997	1.2513	1.0464	0.6394	1.2013	0.7459	0.7722	0.6275	0.8109	0.8782	0.9093	1.1637	0.6554	1.7802	0.9348	1.2241	0.6591	1.1091	1.2671	0.9394	1.5493
7	0.9235	0.7814	1.2972	1.0517	0.5301	0.9832	0.6973	0.6199	0.5404	0.6664	0.6884	0.6942	0.8505	0.5787	0.8752	0.762	1.0528	0.5454	0.8524	0.9475	0.7403	1.4193
8	0.7421	0.5704	0.8066	0.7765	0.4638	0.7444	0.5136	0.5297	0.4806	0.5432	0.5456	0.606	0.6515	0.46	0.6716	0.5821	0.8128	0.4605	0.6476	0.722	0.7415	0.8469
9	0.7125	0.6623	0.7312	0.6226	0.5048	0.7751	0.5212	0.5472	0.5194	0.5515	0.6073	0.5358	0.6653	0.5475	0.6402	0.6584	0.7749	0.5057	0.651	0.7229	0.7041	0.6741
10	0.6818	0.7846	1.0133	0.6568	0.4773	0.794	0.5055	0.523	0.5625	0.517	0.5977	0.476	0.6512	0.7022	0.638	0.7231	0.7818	0.524	0.6037	0.6318	0.612	0.7058
11	0.6171	0.6494	0.702	0.5511	0.4397	0.7782	0.4753	0.5166	0.4824	0.5009	0.5533	0.4197	0.6247	0.6608	0.5896	0.5952	0.7325	0.5509	0.505	0.6416	0.6012	0.8558
12	0.5632	0.6113	0.5673	0.4625	0.5196	0.929	0.4641	0.509	0.438	0.5422	0.5291	0.4469	0.5473	0.6093	0.5852	0.55	0.635	0.7139	0.515	0.6525	0.6607	0.6205
13	0.5674	0.6266	0.6287	0.4868	0.4801	0.9419	0.5804	0.565	0.4437	0.5958	0.5899	0.4834	0.574	0.5446	0.5967	0.6418	0.6644	0.6137	0.5093	0.6544	0.6563	0.6348
14	0.527	0.5885	0.9394	0.5344	0.4267	0.874	0.5344	0.4901	0.4019	0.4915	0.5632	0.4544	0.6293	0.6022	0.6039	0.5872	0.6469	0.5724	0.4673	0.6562	0.4781	0.7085
15	0.9723	1.2069	2.536	1.6323	0.4813	1.7057	1.3021	0.5607	0.4775	1.2355	1.4674	1.355	0.6828	0.7193	1.4555	1.1624	1.157	0.5692	1.544	1.8953	0.5712	1.1258
16	1.1924	1.3515	2.0555	1.8617	0.7238	2.0636	1.4207	0.7979	0.7099	0.9749	1.7761	1.5824	0.8802	1.3866	1.4864	1.6839	1.2732	1.0664	2.2585	2.0369	0.7867	1.0385
17	1.5923	0.9492	2.9388	1.7737	0.7333	1.8099	1.3311	1.4687	0.776	0.9005	1.8927	1.6103	0.9352	2.4922	1.8739	1.7806	1.3624	1.0494	1.7402	1.9629	0.62	1.1578
18	2.1614	1.3875	4.3497	2.6665	0.6988	2.3679	1.6446	1.4889	1.1978	1.0316	2.602	1.8425	2.191	2.469	2.1545	2.6158	1.2231	2.0745	1.4266	2.3513	1.0323	0.9872
19	2.4273	1.4048	4.0587	3.5868	0.7211	2.4771	1.68	1.4807	1.2536	1.161	2.8868	1.8831	2.3432	2.7341	2.2476	3.1362	1.1996	2.5287	1.289	2.533	1.1434	0.828
20	0.992	1.1635	2.9225	3.3968	0.6201	2.7433	0.9261	1.1996	0.8766	0.9033	2.8167	1.0045	1.8882	1.8459	2.4127	2.5901	1.5971	2.0654	1.1989	1.7538	0.8024	0.6938
21	1.6898	2.2973	2.0927	2.0502	0.9627	2.403	1.7465	2.5466	1.4117	1.7518	2.1779	2.0781	2.4835	2.0725	1.9765	2.0558	1.4087	1.816	0.829	0.9625	2.0492	0.9583
22	1.3032	1.5848	1.3492	1.3775	0.809	1.6764	1.3726	1.8934	1.4591	1.0622	1.5299	1.4561	1.9092	1.3625	1.4587	1.5749	1.0977	1.973	0.9726	1.0073	1.3565	0.8342
23	1.4415	1.581	1.3295	1.3265	0.8871	1.5703	1.4776	2.3166	1.3888	1.1774	1.5344	1.5564	1.9199	1.4858	1.3548	1.6383	1.0742	2.2668	1.0623	1.0965	1.496	0.8962
24	0.9679	0.8534	1.017	0.9917	0.6659	1.1646	0.9303	1.5243	0.9162	0.842	1.1086	0.9378	1.3191	1.0863	0.8475	1.4565	0.9285	1.3072	0.9802	0.8579	0.9816	0.768
25	0.6764	0.5705	0.6644	0.6932	0.4264	0.659	0.6494	0.8654	0.6279	0.5237	0.6974	0.6014	0.8565	0.6395	0.6025	0.8963	0.6414	0.84	0.5893	0.7289	0.6011	0.5203
26	0.5915	0.5743	0.5732	0.5753	0.4101	0.69	0.5365	0.6673	0.626	0.47	0.6311	0.5242	0.6072	0.5056	0.5244	0.6538	0.5723	0.6093	0.447	0.5042	0.5253	0.4579
27	0.7575	0.7169	0.7003	0.7263	0.5356	0.9384	0.6358	1.0269	0.8551	0.599	0.8348	0.6448	0.7583	0.6279	0.6499	0.8204	0.778	0.9198	0.5734	0.6184	0.6448	0.6241
28	0.8111	0.7388	0.7819	0.7446	0.515	0.9311	0.6617	0.9185	0.6899	0.5803	0.7385	0.6075	0.7907	0.6194	0.5865	0.8716	0.8225	0.82	0.6079	0.7409	0.6009	0.6418
29	0.6807	0.6723	0.672	0.6034	0.4159	0.7726	0.5063	0.7597	0.6011	0.5017	0.6227	0.4525	0.6851	0.5212	0.5088	0.6629	0.7066	0.6418	0.5057	0.6492	0.4261	0.568
30	0.6936	0.5981	0.5121	0.5772	0.4283	0.7339	0.486	0.7299	0.6812	0.4985	0.6777	0.4599	0.5998	0.519	0.5803	0.585	0.8691	0.7214	0.4718	0.6282	0.4127	0.5914
31	0.836	0.6604	0.6936	0.7244	0.5328	0.8572	0.6695	0.8551	0.7665	0.5955	0.7755	0.5729	0.7617	0.6114	0.6925	0.8401	1.1412	0.8307	0.5919	0.7487	0.5081	0.7182
32	0.8995	0.7845	0.8218	0.8059	0.5455	0.9313	0.72	0.9343	0.7752	0.6241	0.8124	0.6352	0.8699	0.6689	0.7323	0.9994	1.1296	0.817	0.6455	0.7997	0.5617	0.8386
33	0.7782	0.7078	0.7481	0.7658	0.4864	0.8465	0.6305	0.7198	0.7168	0.5263	0.6944	0.5343	0.7221	0.5773	0.668	0.8793	1.0701	0.7075	0.5898	0.6968	0.4802	0.9782
34	1.0172	0.7511	0.8467	0.832	0.5723	0.9118	0.8231	0.7964	0.7436	0.6477	0.7652	0.6057	0.8497	0.6236	0.7805	1.0545	1.4609	0.774	0.7177	0.8326	0.5489	1.0297
35	0.9611	0.7289	0.7852	0.8586	0.585	0.9333	0.7013	0.902	0.714	0.6348	0.7155	0.5169	0.8583	0.5706	0.7617	1.0254	1.2239	0.7829	0.6619	0.7529	0.5313	1.0751
36	1.3464	0.7928	0.8855	1.2293	0.7122	1.3287	0.7984	1.6762	1.0427	0.7456	0.8434	0.638	1.4016	0.7405	1.0597	1.4258	1.6018	0.8661	0.7797	1.0565	0.5745	1.1648
37	1.3255	0.9405	1.1411	1.4329	0.8879	1.6687	1.2038	1.6244	1.5211	0.9185	1.2433	0.8331	1.5585	1.0129	1.2539	1.5541	1.5899	1.1541	1.0248	1.2619	0.7566	1.4881
38	1.2821	1.347	1.4016	1.6148	1.0355	1.9522	1.162	1.9823	1.8913	1.1081	1.9432	0.9041	1.5562	1.0975	1.4482	1.5691	1.6257	2.2765	1.1618	1.4106	0.8811	1.5183
39	1.0904	1.0845	1.1106	1.2724	0.8566	1.5985	0.9279	1.5679	1.3529	0.899	1.488	0.751	1.1363	0.9135	1.1695	1.2421	1.2452	1.7819	0.8841	1.1429	0.8392	1.2186
40	0.8953	0.7767	0.8616	0.9374	0.6971	1.2119	0.7301	1.132	0.852	0.7808	1.0803	0.6805	0.7593	0.6862	0.9095	0.9118	0.9288	1.2135	0.6949	0.887	0.7111	0.9031
41	0.8711	0.8393	0.8454	0.8974	0.7379	1.3259	0.7583	1.0022	0.8132	0.8236	1.0318	0.761	0.7614	0.6933	0.8952	0.9866	0.9686	1.0445	0.7452	0.8664	0.7258	0.9212
42	0.9594	0.8537	0.8522	0.8982	0.7411	1.2289	0.7859	0.83	0.6899	0.8622	0.9405	0.7824	0.784	0.7354	0.9296	1.0043	0.9061	0.8037	0.7719	0.8309	0.8634	0.8817
43	0.7418	0.675	0.706	0.6919	0.5673	0.9969	0.6424	0.663	0.5662	0.6923	0.7842	0.6403	0.6253	0.6648	0.7262	0.8507	0.8053	0.6561	0.6002	0.706	0.7747	0.7145
44	0.6082	0.4969	0.5759	0.486	0.4715	0.797	0.4848	0.5049	0.4293	0.5452	0.5856	0.4903	0.4958	0.6036	0.5487	0.584	0.666	0.5715	0.4877	0.5877	0.6057	0.6073
45	0.6259	0.4949	0.5514	0.4798	0.4897	0.7304	0.4656	0.4931	0.3774	0.5412	0.5332	0.4739	0.4848	0.531	0.5188	0.5314	0.6326	0.5527	0.4734	0.6178	0.5961	0.5117
46	0.5553	0.5041	0.553	0.4865	0.4584	0.7413	0.4599	0.4974	0.406	0.5124	0.5447	0.4643	0.5474	0.5334	0.506	0.5709	0.5811	0.4998	0.4879	0.639	0.4984	0.5704
47	0.4965	0.499	0.5196	0.4765	0.4206	0.7441	0.4518	0.5044	0.4028	0.5207	0.5562	0.4669	0.5053	0.4949	0.5085	0.535	0.5258	0.5121	0.5049	0.6143	0.5283	0.536
48	0.5277	0.5098	0.6073	0.5593	0.4302	0.7787	0.5415	0.5415	0.4045	0.5219	0.6128	0.5628	0.5294	0.522	0.5739	0.5969	0.5661	0.5075	0.5654	0.6996	0.5289	0.561
49	0.6015	0.56	0.6285	0.5989	0.4499	0.7072	0.6678	0.567	0.4484	0.5312	0.6598	0.6257	0.5844	0.5276	0.6174	0.6999	0.7076	0.4842	0.6197	0.7952	0.5432	0.5592
50	0.729	0.7202	0.7069	0.6895	0.5303	0.8113	0.8581	0.6328	0.4926	0.5755	0.7296	0.745	0.6879	0.6146	0.7027	0.8866	0.7541	0.5565	0.7119	0.9312	0.5952	0.69
51	0.7077	0.7005	0.6688	0.6746	0.5532	0.7636	0.8473	0.6318	0.5079	0.6086	0.7039	0.7493	0.6602	0.6106	0.6925	0.8649	0.7193	0.5561	0.7343	0.8331	0.6098	0.7072
52	0.7089	0.7063	0.7149	0.7496	0.5526	0.7541	0.7642	0.6376	0.556	0.6771	0.7218	0.7568	0.6786	0.6045	0.7543	0.8344	0.7558	0.5802	0.7612	0.8973	0.6367	0.7358
53	0.603	0.6053	0.6581	0.6456	0.477	0.6281	0.6515	0.5276	0.473	0.5803	0.6099	0.6306	0.5828	0.5454	0.6126	0.647	0.6432	0.5018	0.6306	0.714	0.5466	0.6368
54	0.5323	0.4965	0.5824	0.5605	0.4329	0.5568	0.5561	0.4587	0.4256	0.478	0.5204	0.5363	0.501	0.4729	0.5398	0.5659	0.53	0.4684	0.5263	0.5757	0.4768	0.5696
55	0.6433	0.5903	0.6236	0.6699	0.5092	0.622	0.6145	0.5548	0.4744	0.5356	0.6021	0.6474	0.5641	0.4967	0.6244	0.6267	0.6126	0.5056	0.6428	0.6866	0.5438	0.6498
56	0.6786	0.6529	0.6709	0.6785	0.5241	0.6869	0.6246	0.5888	0.4761	0.5856	0.6117	0.6581	0.5765	0.5116	0.6484	0.5848	0.6302	0.5216	0.643	0.6859	0.5812	0.6517
57	0.5521	0.5211	0.5588	0.5446	0.4365	0.5675	0.5108	0.4739	0.4147	0.4883	0.4948	0.5128	0.5038	0.4544	0.517	0.4757	0.5098	0.4639	0.4913	0.532	0.5196	0.5148
58	0.6191	0.5753	0.5714	0.5834	0.4771	0.6434	0.5104	0.5329	0.4575	0.5243	0.5153	0.5256	0.5302	0.472	0.5754	0.4963	0.5445	0.4916	0.5395	0.6019	0.5764	0.5697
59	0.7776	0.7894	0.7878	0.7432	0.6731	0.8938	0.7313	0.739	0.6443	0.7491	0.6969	0.6904	0.7598	0.6819	0.8165	0.7084	0.7587	0.6994	0.7113	0.8183	0.8811	0.7234
60	0.788	0.6862	0.6997	0.6769	0.5783	0.7698	0.6381	0.6522	0.6785	0.6698	0.6803	0.7297	0.6434	0.6255	0.7104	0.6471	0.6917	0.6463	0.6536	0.7594	1.1548	0.647
61	1.086	0.8118	0.8776	0.7255	0.6422	0.8718	0.7069	0.8393	0.7894	0.8017	0.8449	0.947	0.8194	0.7501	0.9359	0.7724	0.9159	0.7364	0.7288	0.8233	2.045	0.6868
62	0.9106	0.6817	0.7464	0.689	0.6135	0.8684	0.6116	0.7157	0.6395	0.7077	0.7356	0.7575	0.7205	0.6466	0.8	0.6957	0.7677	0.6705	0.6567	0.7861	1.0822	0.6133
63	0.8196	0.6687	0.7433	0.6655	0.6379	0.9285	0.6086	0.7077	0.6116	0.7416	0.7458	0.6792	0.6911	0.6567	0.778	0.7026	0.7829	0.6882	0.6853	0.8041	0.9333	0.6075
64	1.078	0.8012	0.8523	0.7882	0.7892	1.1419	0.7357	0.8406	0.7453	0.941	0.8878	0.8494	0.8327	0.7848	0.9889	0.8534	0.9942	0.8232	0.9655	1.0376	1.083	0.7893
65	1.0994	0.7787	0.8125	0.7338	0.7587	1.1168	0.6745	0.809	0.7044	0.9648	0.8477	0.8127	0.7969	0.7465	1.0388	0.8182	0.9873	0.8244	1.007	1.0643	1.0276	0.7798
66	1.5018	1.0818	1.1374	0.9916	1.0485	1.4778	0.9294	1.0876	0.9503	1.2884	1.1671	1.2275	1.1194	1.0049	1.4215	1.11	1.3576	1.1767	1.5245	1.4237	1.3282	1.0324
67	1.8189	1.3452	1.3944	1.2892	1.2983	1.6724	1.1365	1.2268	1.2047	1.5063	1.4458	1.5492	1.4186	1.2433	1.7175	1.3454	1.6315	1.3901	1.7861	1.6223	1.7585	1.2504
68	1.7676	1.4026	1.3474	1.2847	1.2968	1.658	1.2004	1.2008	1.2592	1.5261	1.3978	1.6843	1.4145	1.2657	1.6523	1.3737	1.6223	1.3803	1.6462	1.5736	1.8438	1.2748
69	1.5138	1.205	1.2035	1.167	1.1585	1.4336	1.0305	1.0517	1.081	1.2633	1.2668	1.4385	1.2914	1.0926	1.4597	1.2088	1.4304	1.1859	1.4349	1.3236	1.6975	1.086
70	1.2296	0.9837	0.9945	1.0101	0.9787	1.2135	0.826	0.8795	0.8689	1	1.0422	1.1822	1.0678	0.9021	1.1352	0.9838	1.1609	0.9506	1.1097	1.1286	1.3923	0.8927
71	1.0157	0.8612	0.8539	0.9008	0.8585	1.0229	0.765	0.7363	0.8332	0.8745	0.902	0.8712	0.9336	0.8029	0.9048	0.8696	1.0262	0.7847	0.8713	0.8833	1.1974	0.8185
72	0.6385	0.5192	0.5364	0.557	0.5083	0.7213	0.4419	0.496	0.4359	0.562	0.554	0.5084	0.5266	0.4927	0.6086	0.53	0.6274	0.4966	0.4971	0.6318	0.6527	0.5094
73	0.5074	0.4775	0.4802	0.494	0.4207	0.624	0.4129	0.4326	0.3673	0.5134	0.4847	0.4346	0.4558	0.4289	0.5309	0.4572	0.5124	0.4637	0.4075	0.5164	0.4993	0.4336
74	0.5296	0.5346	0.5339	0.5197	0.4577	0.6356	0.4612	0.476	0.4136	0.5716	0.5571	0.4898	0.5027	0.5042	0.5746	0.4985	0.5661	0.528	0.4786	0.5134	0.522	0.4504
75	0.5352	0.5345	0.54	0.523	0.4434	0.571	0.4862	0.4639	0.4346	0.5326	0.535	0.4942	0.4959	0.5204	0.5252	0.492	0.5456	0.4948	0.4959	0.5024	0.5192	0.4796
76	0.7248	0.7176	0.7715	0.7026	0.5872	0.7792	0.6689	0.6968	0.6459	0.7444	0.7417	0.7062	0.7063	0.7611	0.7366	0.6875	0.8106	0.6666	0.6885	0.7409	0.8463	0.7035
77	0.8572	0.7859	0.9143	0.8071	0.6971	0.8948	0.7655	0.7736	0.7723	0.783	0.9001	0.8984	0.7839	0.8012	0.8396	0.7893	0.9444	0.7677	0.7943	0.9537	0.8465	0.8775
78	0.6007	0.6293	0.6941	0.6005	0.5114	0.6488	0.5599	0.54	0.5322	0.5363	0.6832	0.6217	0.6126	0.586	0.6249	0.6007	0.7019	0.5921	0.586	0.7446	0.647	0.62
79	0.4664	0.4464	0.5518	0.5092	0.3986	0.5507	0.4574	0.4915	0.4079	0.4807	0.56	0.5261	0.5027	0.4923	0.4913	0.5142	0.535	0.4517	0.4547	0.5833	0.5081	0.4843
80	0.5104	0.4786	0.6216	0.5464	0.3933	0.6674	0.5494	0.5626	0.4173	0.5406	0.5825	0.5925	0.514	0.52	0.5134	0.5337	0.5464	0.511	0.469	0.5947	0.5558	0.539
81	0.5432	0.5086	0.5862	0.5547	0.4067	0.7293	0.5644	0.5644	0.4042	0.5672	0.5889	0.5842	0.4757	0.4846	0.5169	0.4889	0.5768	0.5385	0.5194	0.6263	0.5763	0.5042
82	0.5158	0.4935	0.5966	0.548	0.4188	0.5632	0.4609	0.5049	0.4085	0.48	0.5923	0.4762	0.5165	0.489	0.5257	0.5167	0.5796	0.4937	0.5588	0.7008	0.4772	0.4358
83	0.644	0.5854	0.6745	0.6852	0.5506	0.7277	0.5923	0.6017	0.4898	0.5791	0.7083	0.6506	0.6554	0.6162	0.6412	0.6439	0.7121	0.6338	0.6746	0.7122	0.5985	0.5289
84	0.6711	0.6	0.6464	0.6075	0.4916	0.7131	0.5631	0.5497	0.4779	0.5672	0.5842	0.5818	0.5838	0.6207	0.5776	0.682	0.6419	0.5478	0.5527	0.5394	0.6144	0.5251
85	0.8547	0.6354	0.7228	0.6993	0.6147	0.9619	0.6768	0.7129	0.6093	0.6962	0.7697	0.6528	0.6432	0.7424	0.7409	0.8115	0.8091	0.6819	0.6358	0.6965	0.7809	0.6576
86	0.9451	0.6749	0.7359	0.7303	0.6274	0.9846	0.7062	0.7544	0.6712	0.7336	0.9128	0.6893	0.6911	0.7114	0.7597	0.8298	0.8654	0.7412	0.6606	0.8657	0.8456	0.7066
87	1.122	0.7962	0.8791	1.0962	0.7383	1.1022	0.829	1.0621	1.0894	0.8234	2.0677	0.8171	0.8985	0.8225	0.9117	1.0439	1.0037	1.8985	0.8065	1.1002	1.0046	0.9191
88	2.0255	1.2025	1.2398	1.9713	1.0504	1.6407	1.1823	1.5266	1.4247	1.1899	2.6501	1.2837	1.457	1.442	1.6008	1.6929	1.4695	2.4156	1.2047	2.5492	1.4364	1.5639
89	2.0532	1.2576	1.3282	2.0053	1.1267	1.62	1.2479	1.7625	1.7662	1.2607	2.2932	1.3766	1.6045	1.4378	1.9805	1.3791	1.7861	2.0336	1.2597	2.437	1.487	1.8747
90	1.3837	0.8766	0.9366	1.0434	0.7699	1.2344	0.8317	1.5808	1.2199	0.8984	1.5131	1.0876	1.1374	0.9229	1.9869	0.8916	1.7239	1.1229	0.8301	1.8019	1.0111	1.1281
[truncated: 286 more rows]

## Sheet: ligand RMSDs
	REPLICA 1; RMSD VALUES ARE GIVEN IN ANGSTROM
[truncated: 4,007 more rows]

## Sheet: CONVERGENCE
	MM-PBSA RESULTS FOR REPLICA 1; BRIDGING SOLVENT IS NOT INCLUDED IN THE CALCULATIONS; ENERGIES ARE GIVEN IN KCAL/MOL
[truncated: 8,015 more rows]

[truncated: 3 more sheets: CONVERGENCE_WAT, BRIDGES, RDFs]
